# Supplementary material for: Pulmonary and Renal Long COVID at Two-year Revisit
Source: Research Square preprint supplement (doi:10.21203/rs.3.rs-1513873/v1), 2022-04-19
Supplement: Supplementary file 1 [file TableS1.xlsx]

## Sheet: Cohort details
		Date					Time intervalsb					Basic information					Clinical symptoms and signs												Underlying diseases									Chest CT on admission					Treatment
Patient seq	Groupa	Onset date	Admission date	Severe confirm date	Discharge date	Follow-up date	Admission since onset	Severe since admission	Follow-up since onset	Follow-up since discharge	Length of stay	Gender	Age	BMI	Severe	Family gathering	Fever	Sore throat	Cough	Expectoration	Nasal congestion	Fatigue	Headache	Nausea vomiting	Diarrhea	Chest tightness	Heart rate	Respiratory rate	Hypertension	Diabetes mellitus	Cardiovascular disease	Cerebrovascular diseases	Respiratory system diseases	Cancer	Hepatitis	Chronic kidney disease	Digestive system diseases	CT score	Lung lobes	Patchy/GGO	Consolidation	Fibrosis	Abidol	Antibiotic	Oseltamivir	ImmuNoglobulin	Methylprednisolone	Oxygen inhalation	Interferon
R001	COVID-19	2020-01-20	2020-01-20	2020-01-21	2020-02-15	2021-02-10	1	2	388	362	27	female	62	24.4	Yes	No	Yes	No	Yes	Yes	No	No	No	No	No	No	64	18	No	No	No	No	No	Yes	No	No	No	6	5	Yes	No	No	Yes	No	Yes	Yes	Yes	Yes	Yes
R002	COVID-19	2020-01-21	2020-01-23	2020-01-24	2020-02-08	NA	3	2	NA	NA	17	male	54	28.7	Yes	No	Yes	No	No	No	Yes	No	No	No	No	No	105	20	No	No	No	No	No	No	No	No	No	6	3	Yes	Yes	No	Yes	Yes	No	Yes	Yes	Yes	Yes
R003	COVID-19	2020-01-16	2020-01-23	2020-01-24	2020-02-02	NA	8	2	NA	NA	11	male	41	23.9	Yes	No	Yes	No	Yes	Yes	No	Yes	No	No	No	No	88	20	No	No	No	No	No	No	No	No	No	6	3	Yes	Yes	No	No	Yes	No	Yes	Yes	Yes	Yes
R004	COVID-19	2020-01-21	2020-01-23	NA	2020-02-14	2021-02-09	3	NA	386	362	23	female	45	23.2	No	No	Yes	No	Yes	Yes	Yes	No	No	No	No	No	89	19	No	No	No	No	No	No	No	No	No	3	2	Yes	No	No	Yes	Yes	Yes	No	No	No	Yes
R005	COVID-19	2020-01-23	2020-01-24	2020-01-27	2020-02-19	2021-02-08	2	4	383	356	27	female	35	27.1	Yes	No	Yes	Yes	Yes	Yes	No	No	No	No	No	No	100	18	No	No	No	No	No	No	No	No	No	2	1	Yes	No	No	Yes	Yes	No	Yes	Yes	Yes	Yes
R006	COVID-19	2020-01-09	2020-01-24	2020-01-25	2020-02-14	2021-02-08	16	2	397	361	22	male	74	31.3	Yes	No	No	No	Yes	Yes	No	No	No	No	No	No	68	20	Yes	No	Yes	No	No	No	No	No	No	9	5	Yes	No	Yes	Yes	Yes	No	Yes	Yes	Yes	Yes
R007	COVID-19	2020-01-19	2020-01-24	2020-01-23	2020-02-18	2021-02-08	6	0	387	357	26	male	47	26.9	Yes	No	Yes	No	Yes	No	No	No	No	No	No	Yes	95	18	Yes	No	No	No	No	No	No	Yes	No	6	5	Yes	No	No	Yes	Yes	Yes	Yes	Yes	Yes	Yes
R008	COVID-19	2020-01-12	2020-01-24	2020-01-24	2020-02-01	2021-02-09	13	1	395	375	9	male	50	25.6	Yes	No	Yes	No	Yes	No	No	No	No	No	No	Yes	106	20	No	No	No	No	No	No	No	No	No	8	5	Yes	Yes	No	No	Yes	No	Yes	Yes	Yes	Yes
R009	COVID-19	2020-01-23	2020-01-24	NA	2020-02-07	2021-02-09	2	NA	384	369	15	male	31	23.1	No	No	Yes	No	No	No	No	No	Yes	No	No	No	98	18	No	No	No	No	No	No	No	No	No	0	0	No	No	No	Yes	Yes	Yes	No	No	No	Yes
R010	COVID-19	2020-01-24	2020-01-25	NA	2020-02-23	2021-02-09	2	NA	383	353	30	female	34	26.7	No	No	Yes	No	Yes	Yes	Yes	No	Yes	No	No	No	87	18	No	No	No	No	No	No	No	No	No	0	0	No	No	No	Yes	Yes	No	No	No	Yes	Yes
R011	COVID-19	2020-01-25	2020-01-25	NA	2020-02-19	2021-02-09	1	NA	382	357	26	male	46	26.7	No	Yes	Yes	No	Yes	No	No	Yes	No	No	No	No	106	20	Yes	Yes	No	No	No	No	No	No	No	2	1	Yes	No	No	Yes	Yes	Yes	No	No	No	Yes
R012	COVID-19	2020-01-24	2020-01-25	NA	2020-02-11	NA	2	NA	NA	NA	18	male	33	25.9	No	No	Yes	No	No	No	No	Yes	Yes	No	No	No	90	18	No	No	No	No	No	No	No	No	No	6	5	Yes	No	No	No	Yes	Yes	No	No	No	Yes
R013	COVID-19	2020-01-22	2020-01-25	2020-01-31	2020-02-27	2021-02-07	4	7	383	347	34	female	56	27.3	Yes	Yes	Yes	No	No	No	No	No	Yes	No	No	No	83	19	Yes	No	No	No	No	No	No	No	No	2	1	Yes	No	No	Yes	Yes	Yes	Yes	Yes	Yes	Yes
R014	COVID-19	2020-01-25	2020-01-25	NA	2020-02-19	2021-02-20	1	NA	393	368	26	male	10	24.8	No	Yes	No	No	No	No	No	No	No	No	No	No	87	18	No	No	No	No	No	No	No	No	No	4	3	Yes	No	No	Yes	No	Yes	No	No	Yes	Yes
R015	COVID-19	2020-01-21	2020-01-26	NA	2020-02-01	NA	6	NA	NA	NA	7	female	43	23	No	Yes	No	No	No	No	No	No	No	No	No	No	84	18	No	No	No	No	No	No	Yes	No	No	8	2	Yes	Yes	Yes	No	No	No	No	No	Yes	Yes
R016	COVID-19	2020-01-16	2020-01-26	NA	2020-02-01	NA	11	NA	NA	NA	7	male	41	24.8	No	Yes	Yes	No	Yes	Yes	No	No	No	No	No	No	86	20	Yes	No	No	Yes	No	No	No	No	No	5	4	Yes	No	No	No	No	No	No	No	Yes	Yes
R017	COVID-19	2020-01-26	2020-01-26	NA	2020-03-09	2021-02-08	1	NA	380	337	44	male	50	17.3	No	No	Yes	No	Yes	Yes	No	No	No	No	No	No	70	19	Yes	No	No	No	No	No	No	No	No	6	5	Yes	No	No	No	Yes	Yes	No	No	Yes	Yes
R018	COVID-19	2020-01-22	2020-01-26	NA	2020-02-15	2021-02-10	5	NA	386	362	21	female	45	21.9	No	No	Yes	No	Yes	No	No	No	No	No	No	No	100	21	No	No	No	No	No	No	No	No	No	7	4	Yes	Yes	No	No	No	Yes	No	No	Yes	Yes
R019	COVID-19	2020-01-18	2020-01-27	NA	2020-02-08	2021-02-09	10	NA	389	368	13	female	57	20.7	No	No	Yes	No	Yes	No	No	No	No	No	No	No	102	20	No	No	No	No	No	No	No	No	No	8	2	Yes	Yes	Yes	No	Yes	No	No	No	Yes	Yes
R020	COVID-19	2020-01-15	2020-01-27	2020-01-28	2020-02-18	NA	13	2	NA	NA	23	male	51	22.7	Yes	No	Yes	No	Yes	Yes	No	No	No	No	No	No	99	20	No	Yes	No	No	No	No	No	No	No	6	3	Yes	Yes	No	No	No	Yes	Yes	Yes	Yes	Yes
R021	COVID-19	2020-01-21	2020-01-27	NA	2020-02-08	NA	7	NA	NA	NA	13	male	52	24.2	No	No	Yes	No	Yes	No	No	No	No	No	No	No	62	18	No	No	No	No	No	No	No	No	No	6	2	Yes	No	Yes	No	No	No	No	No	Yes	Yes
R022	COVID-19	2020-01-17	2020-01-27	NA	2020-02-18	NA	11	NA	NA	NA	23	female	55	20.7	No	Yes	Yes	No	No	No	No	No	No	No	No	Yes	80	20	No	No	No	No	No	No	No	No	No	8	5	Yes	Yes	No	Yes	No	No	Yes	Yes	Yes	Yes
R023	COVID-19	2020-01-21	2020-01-27	NA	2020-02-08	NA	7	NA	NA	NA	13	male	41	22	No	No	Yes	No	No	No	No	No	No	No	No	No	57	18	No	No	No	No	No	No	No	No	No	2	1	Yes	No	No	No	No	No	No	No	Yes	Yes
R024	COVID-19	2020-01-14	2020-01-27	NA	2020-02-16	NA	14	NA	NA	NA	21	female	61	28	No	No	Yes	Yes	Yes	Yes	No	No	No	No	No	Yes	79	19	No	No	No	No	Yes	No	No	No	Yes	6	5	Yes	No	No	No	No	No	No	No	Yes	Yes
R025	COVID-19	2020-01-21	2020-01-27	NA	2020-02-03	2021-02-08	7	NA	385	372	8	female	39	19.5	No	Yes	No	No	No	No	No	No	No	No	No	No	84	18	No	No	No	No	No	No	No	No	No	7	3	Yes	No	Yes	No	No	No	No	No	No	Yes
R026	COVID-19	2020-01-19	2020-01-27	NA	2020-02-03	2021-02-08	9	NA	387	372	8	male	39	27.7	No	Yes	No	Yes	Yes	No	No	No	No	No	No	No	73	20	No	No	No	No	No	No	No	No	No	8	4	Yes	No	Yes	No	No	No	No	No	No	Yes
R027	COVID-19	2020-01-19	2020-01-27	NA	2020-02-05	2021-02-09	9	NA	388	371	10	male	46	24.7	No	Yes	Yes	No	Yes	No	No	Yes	No	No	No	No	80	19	Yes	No	No	No	No	No	No	Yes	No	2	1	Yes	No	No	No	No	No	No	No	No	Yes
R028	COVID-19	2020-01-21	2020-01-27	NA	2020-02-10	2021-02-09	7	NA	386	366	15	male	43	21.2	No	No	Yes	No	No	No	No	No	No	No	No	No	82	18	No	No	No	No	No	No	No	No	No	7	3	Yes	No	Yes	No	No	No	No	Yes	Yes	Yes
R029	COVID-19	2020-01-15	2020-01-27	NA	2020-02-22	2021-02-09	13	NA	392	354	27	male	54	24.4	No	No	Yes	No	Yes	Yes	No	Yes	No	No	No	No	85	18	No	No	Yes	No	No	No	No	No	No	10	4	Yes	Yes	Yes	Yes	Yes	No	Yes	Yes	Yes	Yes
R030	COVID-19	2020-01-17	2020-01-27	NA	2020-02-21	2021-02-09	11	NA	390	355	26	male	41	26.1	No	No	Yes	No	Yes	Yes	No	No	No	No	No	Yes	83	18	No	No	No	No	No	No	No	No	No	8	4	Yes	No	Yes	No	No	No	No	No	Yes	Yes
R031	COVID-19	2020-01-19	2020-01-27	NA	2020-02-03	2021-02-09	9	NA	388	373	8	female	20	18.9	No	No	No	No	Yes	Yes	No	No	No	No	No	No	88	20	No	No	No	No	No	No	No	No	No	0	0	No	No	No	No	No	Yes	No	No	No	Yes
R032	COVID-19	2020-01-25	2020-01-28	2020-01-28	2020-03-05	NA	4	1	NA	NA	38	male	34	24.8	Yes	No	Yes	No	Yes	No	No	Yes	No	No	No	Yes	93	21	No	No	No	No	No	No	Yes	No	No	8	5	Yes	Yes	No	Yes	No	Yes	Yes	Yes	Yes	Yes
R033	COVID-19	2020-01-23	2020-01-28	NA	2020-02-10	2021-02-20	6	NA	395	377	14	female	33	21.8	No	No	Yes	No	No	No	Yes	No	No	No	No	No	72	20	No	No	No	No	No	No	No	No	No	4	3	Yes	No	No	No	No	No	No	No	No	Yes
R034	COVID-19	2020-01-24	2020-01-28	NA	2020-02-02	NA	5	NA	NA	NA	6	female	23	18.3	No	No	No	No	No	No	No	No	No	No	No	No	65	20	No	No	No	No	No	No	No	No	No	2	1	Yes	No	No	No	No	No	No	No	Yes	Yes
R035	COVID-19	2020-01-20	2020-01-28	NA	2020-02-10	NA	9	NA	NA	NA	14	female	64	25.1	No	No	No	No	Yes	Yes	No	No	No	No	No	No	86	20	No	No	No	No	No	No	No	No	No	8	2	Yes	Yes	Yes	No	Yes	No	No	No	Yes	Yes
R036	COVID-19	2020-01-18	2020-01-28	NA	2020-02-20	2021-02-09	11	NA	389	356	24	male	57	NA	No	No	Yes	No	Yes	Yes	No	No	No	No	No	No	75	17	No	No	No	No	Yes	No	No	No	No	9	5	Yes	No	Yes	No	No	No	No	Yes	Yes	Yes
R037	COVID-19	2020-01-19	2020-01-29	NA	2020-02-10	2021-02-08	11	NA	387	365	13	male	27	21.7	No	No	Yes	No	Yes	No	No	No	No	No	No	No	80	16	No	No	No	No	No	No	No	No	No	5	4	Yes	No	No	No	No	No	No	No	Yes	Yes
R038	COVID-19	2020-01-24	2020-01-29	NA	2020-02-10	NA	6	NA	NA	NA	13	male	36	24.5	No	No	Yes	No	Yes	No	No	No	No	No	Yes	No	92	18	No	No	No	No	No	No	No	No	No	9	3	Yes	Yes	Yes	No	No	No	No	No	Yes	Yes
R039	COVID-19	2020-01-28	2020-01-29	NA	2020-02-10	2021-02-09	2	NA	379	366	13	male	20	18.9	No	Yes	Yes	No	Yes	No	No	No	No	No	No	No	91	19	No	No	No	No	No	No	No	No	No	4	1	Yes	Yes	No	No	Yes	No	No	No	No	Yes
R040	COVID-19	2020-01-28	2020-01-29	NA	2020-02-22	2021-02-07	2	NA	377	352	25	male	59	20.3	No	No	Yes	No	No	No	No	No	No	No	No	No	71	18	No	No	No	No	No	No	No	No	No	4	3	Yes	No	No	Yes	No	No	No	No	Yes	Yes
R041	COVID-19	2020-01-24	2020-01-29	NA	2020-02-08	NA	6	NA	NA	NA	11	male	21	30.4	No	No	Yes	No	No	No	No	No	No	No	No	No	81	NA	No	No	No	No	No	No	No	No	No	2	1	Yes	No	No	No	No	No	No	No	No	Yes
R042	COVID-19	2020-01-25	2020-01-30	NA	2020-03-08	NA	6	NA	NA	NA	39	female	56	23.9	No	No	Yes	No	No	No	No	No	No	No	No	No	75	20	No	Yes	No	No	No	No	No	No	Yes	6	5	Yes	No	No	Yes	No	No	Yes	Yes	Yes	Yes
R043	COVID-19	2020-01-20	2020-01-30	NA	2020-02-28	2021-02-08	11	NA	386	347	30	female	49	23	No	No	Yes	No	Yes	Yes	No	No	No	No	No	No	73	19	No	No	No	No	No	No	No	No	No	11	5	Yes	Yes	Yes	Yes	No	No	No	No	Yes	Yes
R044	COVID-19	2020-01-26	2020-01-30	NA	2020-02-15	2021-02-09	5	NA	381	361	17	female	46	25.7	No	No	Yes	No	Yes	No	No	No	No	No	No	No	78	18	No	No	No	No	Yes	No	No	No	No	NA	NA	NA	NA	NA	Yes	No	No	No	No	No	Yes
R045	COVID-19	2020-01-18	2020-01-31	2020-01-31	2020-02-22	NA	14	1	NA	NA	23	male	47	28.3	Yes	No	Yes	No	No	No	No	No	No	No	No	No	83	18	Yes	Yes	No	No	No	No	No	No	No	8	5	Yes	Yes	No	Yes	No	Yes	Yes	Yes	Yes	Yes
R046	COVID-19	2020-01-25	2020-01-31	NA	2020-02-16	2021-02-09	7	NA	382	360	17	male	35	25.1	No	No	Yes	No	No	No	No	No	No	No	Yes	No	78	19	No	No	No	No	No	No	No	No	No	NA	NA	NA	NA	NA	No	No	No	No	No	No	Yes
R047	COVID-19	2020-01-28	2020-01-31	NA	2020-03-06	NA	4	NA	NA	NA	36	female	55	19.8	No	No	Yes	No	No	No	No	No	No	No	No	No	82	20	No	Yes	No	No	No	No	No	No	No	6	2	Yes	No	Yes	Yes	No	No	No	No	Yes	Yes
R048	COVID-19	2020-01-28	2020-01-31	NA	2020-02-07	NA	4	NA	NA	NA	8	male	27	22.5	No	Yes	Yes	No	No	No	No	No	No	No	No	No	65	NA	No	No	No	No	Yes	No	No	No	No	3	2	Yes	No	No	No	No	No	No	No	No	Yes
R049	COVID-19	2020-01-28	2020-01-31	NA	2020-02-08	2021-02-09	4	NA	379	368	9	male	37	22.8	No	No	No	No	No	No	No	No	No	No	No	No	86	18	No	No	No	No	No	No	No	No	No	0	0	No	No	No	No	No	No	No	No	No	Yes
R050	COVID-19	2020-01-24	2020-01-31	NA	2020-02-18	NA	8	NA	NA	NA	19	male	46	27.7	No	No	Yes	No	Yes	No	No	No	No	No	No	No	75	18	Yes	No	No	No	No	No	No	No	No	NA	NA	NA	NA	NA	Yes	No	No	No	No	Yes	Yes
R051	COVID-19	2020-01-19	2020-01-31	NA	2020-03-08	2021-02-08	13	NA	387	338	38	male	51	24.2	No	Yes	No	No	Yes	No	No	No	No	No	No	No	88	18	Yes	No	No	No	No	No	No	No	No	NA	NA	NA	NA	NA	Yes	Yes	No	No	No	Yes	Yes
R052	COVID-19	2020-01-26	2020-01-31	NA	2020-02-08	2021-02-09	6	NA	381	368	9	male	43	26.8	No	No	Yes	No	No	No	No	No	No	No	No	No	63	18	No	No	No	No	No	No	No	No	No	8	5	Yes	Yes	No	No	No	No	No	No	No	Yes
R053	COVID-19	2020-01-21	2020-01-31	2020-01-31	2020-02-20	NA	11	1	NA	NA	21	female	59	22.9	Yes	Yes	Yes	No	No	No	No	No	Yes	No	No	No	71	NA	No	No	No	No	No	No	No	No	No	11	5	Yes	Yes	Yes	No	Yes	No	No	No	Yes	Yes
R054	COVID-19	2020-01-28	2020-01-31	NA	2020-02-12	NA	4	NA	NA	NA	13	male	60	28.9	No	Yes	No	No	No	No	No	No	Yes	No	No	No	78	18	No	Yes	No	No	No	No	No	No	No	NA	NA	NA	NA	NA	No	No	No	No	No	Yes	Yes
R055	COVID-19	2020-01-31	2020-01-31	NA	2020-03-11	NA	1	NA	NA	NA	41	male	55	21.7	No	No	No	No	No	No	No	No	No	No	No	No	100	19	No	No	No	No	No	No	No	No	No	0	0	No	No	No	Yes	No	No	No	No	No	Yes
R056	COVID-19	2020-01-24	2020-02-01	2020-02-01	2020-02-12	2021-02-20	9	1	394	375	12	female	64	22.2	Yes	No	Yes	No	No	No	No	No	Yes	No	No	No	92	18	No	No	No	No	No	No	No	No	No	8	5	Yes	Yes	No	Yes	No	No	Yes	Yes	Yes	Yes
R057	COVID-19	2020-01-23	2020-02-01	NA	2020-02-14	2021-02-09	10	NA	384	362	14	male	39	28.5	No	No	Yes	No	No	No	No	No	No	No	No	No	93	19	No	No	No	No	No	No	No	No	No	NA	NA	NA	NA	NA	No	No	No	No	No	No	Yes
R058	COVID-19	2020-01-18	2020-02-01	NA	2020-02-07	NA	15	NA	NA	NA	7	male	67	26.4	No	Yes	Yes	No	No	No	No	No	No	No	No	No	84	20	Yes	No	No	No	No	No	No	No	No	5	4	Yes	No	No	No	No	No	No	No	Yes	Yes
R059	COVID-19	2020-01-28	2020-02-01	NA	2020-02-13	2021-02-09	5	NA	379	363	13	male	39	24.2	No	No	Yes	No	No	No	No	No	No	No	No	No	82	18	No	No	No	No	No	No	No	No	Yes	NA	NA	NA	NA	NA	No	No	No	No	No	No	Yes
R060	COVID-19	2020-01-24	2020-02-01	2020-02-04	2020-02-27	NA	9	4	NA	NA	27	male	55	27.3	Yes	Yes	Yes	No	No	No	No	No	No	No	No	No	75	18	Yes	Yes	No	No	No	No	No	No	No	10	4	Yes	Yes	Yes	Yes	No	Yes	Yes	Yes	Yes	Yes
R061	COVID-19	2020-01-27	2020-02-01	2020-02-04	2020-03-03	NA	6	4	NA	NA	32	female	52	24.5	Yes	Yes	Yes	No	Yes	No	No	No	No	No	No	No	80	18	No	No	No	No	No	No	No	No	No	8	5	Yes	Yes	No	Yes	No	Yes	Yes	Yes	Yes	Yes
R062	COVID-19	2020-01-24	2020-02-01	2020-02-04	2020-03-07	NA	9	4	NA	NA	36	female	65	23.4	Yes	Yes	Yes	No	Yes	No	No	No	No	No	No	No	77	18	No	No	No	No	No	No	No	No	No	10	4	Yes	Yes	Yes	Yes	Yes	Yes	Yes	Yes	Yes	Yes
R063	COVID-19	2020-01-28	2020-02-01	NA	2020-02-08	2021-02-09	5	NA	379	368	8	female	36	21.8	No	No	No	No	No	No	No	No	No	No	No	No	78	18	No	No	No	No	No	No	No	No	No	2	1	Yes	No	No	No	No	No	No	No	No	Yes
R064	COVID-19	2020-01-25	2020-02-01	NA	2020-02-13	2021-02-08	8	NA	381	362	13	male	39	27.7	No	Yes	No	Yes	No	No	No	No	No	No	No	No	97	18	No	No	No	No	No	No	No	No	No	NA	NA	NA	NA	NA	No	No	No	No	No	Yes	Yes
R065	COVID-19	2020-01-24	2020-02-02	2020-02-02	2020-03-09	NA	10	1	NA	NA	37	male	75	24.7	Yes	No	Yes	No	Yes	Yes	No	No	No	No	No	No	75	19	No	No	No	No	No	No	No	No	No	11	5	Yes	Yes	Yes	Yes	Yes	No	Yes	Yes	Yes	Yes
R066	COVID-19	2020-01-30	2020-02-02	NA	2020-02-12	2021-02-08	4	NA	376	363	11	female	48	23.1	No	Yes	No	No	No	No	No	No	No	No	No	No	68	18	No	No	No	No	No	No	No	No	No	NA	NA	NA	NA	NA	No	No	No	No	No	Yes	Yes
R067	COVID-19	2020-01-24	2020-02-02	NA	2020-02-15	NA	10	NA	NA	NA	14	female	45	19.6	No	No	No	No	Yes	No	No	No	No	No	No	No	75	18	No	No	No	No	No	No	No	No	No	NA	NA	NA	NA	NA	No	No	No	No	No	Yes	Yes
R068	COVID-19	2020-01-30	2020-02-02	NA	2020-02-18	2021-02-08	4	NA	376	357	17	male	47	30.7	No	Yes	Yes	No	No	No	No	No	No	No	No	No	89	19	No	No	No	No	No	No	No	No	No	NA	NA	NA	NA	NA	No	No	No	No	No	Yes	Yes
R069	COVID-19	2020-01-10	2020-02-02	2020-02-04	2020-02-23	NA	24	3	NA	NA	22	male	62	24.9	Yes	No	Yes	No	Yes	No	No	Yes	No	No	No	No	72	NA	No	No	No	No	No	No	No	No	No	7	4	Yes	Yes	No	Yes	Yes	Yes	Yes	Yes	Yes	Yes
R070	COVID-19	2020-01-17	2020-02-02	NA	2020-03-02	NA	17	NA	NA	NA	30	female	86	20.8	No	Yes	No	No	Yes	Yes	No	No	No	No	No	Yes	74	19	Yes	No	No	No	No	No	No	No	No	7	4	Yes	Yes	No	No	No	No	No	No	Yes	Yes
R071	COVID-19	2020-01-31	2020-02-02	NA	2020-02-19	NA	3	NA	NA	NA	18	male	57	22.9	No	Yes	No	No	No	No	No	No	No	No	No	No	66	20	No	No	No	No	No	No	No	No	No	NA	NA	NA	NA	NA	Yes	No	No	No	No	No	Yes
R072	COVID-19	2020-01-29	2020-02-02	NA	2020-02-11	NA	5	NA	NA	NA	10	female	40	22.6	No	No	No	No	Yes	No	No	Yes	No	No	No	No	105	20	No	No	No	No	No	No	No	No	No	NA	NA	NA	NA	NA	Yes	No	Yes	No	No	No	Yes
R073	COVID-19	2020-01-29	2020-02-02	NA	2020-02-22	NA	5	NA	NA	NA	21	male	44	22.8	No	Yes	No	No	No	No	No	No	No	No	No	Yes	76	18	No	No	No	No	No	No	No	No	Yes	NA	NA	NA	NA	NA	Yes	No	No	No	No	Yes	Yes
R074	COVID-19	2020-01-31	2020-02-02	NA	2020-02-12	NA	3	NA	NA	NA	11	male	36	24.9	No	No	No	No	Yes	No	No	No	No	No	No	No	73	NA	No	No	No	No	No	No	No	No	No	NA	NA	NA	NA	NA	No	No	No	No	No	Yes	Yes
R075	COVID-19	2020-01-29	2020-02-03	NA	2020-03-07	2021-02-10	6	NA	379	341	34	female	51	24.1	No	Yes	Yes	No	No	No	Yes	No	No	No	No	No	95	18	No	Yes	No	No	No	No	No	No	No	NA	NA	NA	NA	NA	No	No	No	No	No	Yes	Yes
R076	COVID-19	2020-01-26	2020-02-03	NA	2020-03-04	2021-02-09	9	NA	381	343	31	male	44	29.4	No	No	Yes	No	Yes	Yes	No	No	No	No	No	No	98	19	No	No	No	No	No	No	No	No	No	NA	NA	NA	NA	NA	Yes	No	No	No	No	Yes	Yes
R077	COVID-19	2020-01-31	2020-02-03	NA	2020-02-21	NA	4	NA	NA	NA	19	male	66	24.9	No	Yes	Yes	No	No	No	No	No	No	No	No	No	82	18	Yes	Yes	No	No	No	No	No	No	No	NA	NA	NA	NA	NA	No	No	No	No	No	Yes	Yes
R078	COVID-19	2020-01-31	2020-02-03	NA	2020-03-04	2021-02-08	4	NA	375	342	31	male	63	19.2	No	Yes	No	No	Yes	No	No	No	No	No	No	No	96	NA	No	No	No	No	No	No	No	No	No	5	4	Yes	No	No	Yes	Yes	No	No	No	Yes	Yes
R079	COVID-19	2020-01-28	2020-02-03	NA	2020-02-23	NA	7	NA	NA	NA	21	female	35	24.6	No	Yes	Yes	No	No	No	No	No	No	No	No	No	90	NA	No	No	No	No	No	No	No	No	No	4	1	Yes	Yes	No	Yes	No	No	No	No	Yes	Yes
R080	COVID-19	2020-01-31	2020-02-03	2020-02-08	2020-02-21	2021-02-08	4	6	375	354	19	male	51	25.8	Yes	Yes	Yes	No	Yes	No	No	No	No	No	No	No	83	18	Yes	No	No	No	No	No	No	No	No	11	5	Yes	Yes	Yes	No	No	Yes	No	No	Yes	Yes
R081	COVID-19	2020-01-31	2020-02-03	NA	2020-03-02	NA	4	NA	NA	NA	29	female	34	25.7	No	Yes	No	No	No	No	No	No	No	No	No	No	75	18	No	No	No	No	No	No	No	No	No	3	2	Yes	No	No	Yes	No	Yes	No	No	No	Yes
R082	COVID-19	2020-02-01	2020-02-04	2020-02-05	2020-02-23	2021-02-08	4	2	374	352	20	male	70	28.3	Yes	Yes	Yes	No	No	No	No	No	No	No	No	No	89	19	No	No	No	No	No	No	No	No	No	9	5	Yes	No	Yes	Yes	No	No	Yes	Yes	Yes	Yes
R083	COVID-19	2020-02-02	2020-02-04	NA	2020-03-03	NA	3	NA	NA	NA	29	male	70	25.9	No	No	Yes	No	No	No	No	No	No	No	No	No	74	NA	No	Yes	No	No	No	No	No	No	No	6	5	Yes	No	No	Yes	No	No	No	No	Yes	Yes
R084	COVID-19	2020-02-02	2020-02-04	2020-02-07	2020-03-01	2021-02-20	3	4	385	357	27	male	43	25.4	Yes	No	Yes	No	No	No	No	No	No	No	No	No	66	18	No	No	No	No	No	No	No	No	No	5	2	Yes	Yes	No	Yes	Yes	No	Yes	Yes	Yes	Yes
R085	COVID-19	2020-02-02	2020-02-05	NA	2020-03-03	2021-02-20	4	NA	385	355	28	female	37	22.5	No	No	Yes	No	No	No	No	No	No	No	No	No	84	18	No	No	No	No	No	No	No	No	No	2	1	Yes	No	No	Yes	No	No	No	No	Yes	Yes
R086	COVID-19	2020-01-29	2020-02-05	NA	2020-02-13	NA	8	NA	NA	NA	9	female	37	21.5	No	Yes	No	No	No	No	No	No	No	No	No	No	78	20	No	No	No	No	No	No	No	No	No	3	2	Yes	No	No	No	No	No	No	No	Yes	Yes
R087	COVID-19	2020-01-29	2020-02-05	NA	2020-03-02	NA	8	NA	NA	NA	27	female	44	29.1	No	Yes	No	No	No	No	No	No	No	No	No	No	82	20	No	No	No	No	No	No	No	No	No	4	3	Yes	No	No	Yes	No	No	No	No	Yes	Yes
R088	COVID-19	2020-02-01	2020-02-05	NA	2020-02-12	2021-02-20	5	NA	386	375	8	male	12	22	No	Yes	No	No	No	No	No	Yes	No	No	No	No	76	20	No	No	No	No	No	No	No	No	No	4	3	Yes	No	No	No	No	No	No	No	Yes	Yes
R089	COVID-19	2020-02-02	2020-02-05	NA	2020-02-23	NA	4	NA	NA	NA	19	male	66	21	No	No	Yes	No	No	No	No	No	No	No	No	No	104	20	Yes	No	No	No	No	No	No	No	Yes	8	2	Yes	Yes	Yes	No	No	No	No	No	Yes	Yes
R090	COVID-19	2020-02-03	2020-02-05	NA	2020-03-04	NA	3	NA	NA	NA	29	male	53	28.3	No	No	No	No	No	No	No	No	No	No	No	No	64	20	No	No	No	No	No	No	No	No	No	2	1	Yes	No	No	Yes	No	No	No	No	Yes	Yes
R091	COVID-19	2020-02-01	2020-02-06	NA	2020-02-26	NA	6	NA	NA	NA	21	female	53	26.7	No	No	Yes	No	Yes	No	No	No	No	No	No	Yes	81	19	No	No	No	No	No	No	No	No	No	7	4	Yes	Yes	No	Yes	No	No	No	No	Yes	Yes
R092	COVID-19	2020-02-03	2020-02-06	2020-02-08	2020-02-28	2021-02-09	4	3	373	348	23	female	36	24.7	Yes	No	Yes	No	No	No	No	No	No	No	No	No	100	20	No	No	No	No	No	No	No	No	No	11	5	Yes	Yes	Yes	Yes	No	No	Yes	No	Yes	Yes
R093	COVID-19	2020-01-30	2020-02-06	2020-02-07	2020-03-10	2021-02-09	8	2	377	337	34	female	68	NA	Yes	No	Yes	No	No	No	No	No	No	No	Yes	No	57	19	No	No	Yes	No	No	No	No	No	No	8	5	Yes	Yes	No	Yes	Yes	No	Yes	Yes	Yes	Yes
R094	COVID-19	2020-01-26	2020-02-07	NA	2020-02-16	2021-02-20	13	NA	392	371	10	male	31	23.2	No	No	Yes	No	Yes	No	No	No	No	No	No	No	71	19	No	No	No	No	No	No	No	No	No	4	3	Yes	No	No	Yes	No	No	No	No	No	Yes
R095	COVID-19	2020-01-30	2020-02-07	NA	2020-02-23	2021-02-08	9	NA	376	352	17	female	50	22.2	No	Yes	Yes	Yes	No	No	No	No	Yes	No	No	No	98	20	No	No	No	No	No	No	Yes	No	No	7	NA	Yes	Yes	No	Yes	No	No	No	Yes	Yes	Yes
R096	COVID-19	2020-02-01	2020-02-07	2020-02-09	2020-03-09	NA	7	3	NA	NA	32	male	56	26.6	Yes	Yes	Yes	No	No	No	No	No	No	No	No	No	86	20	No	No	No	No	No	No	No	No	No	8	5	Yes	Yes	No	Yes	Yes	No	Yes	Yes	Yes	Yes
R097	COVID-19	2020-01-24	2020-01-25	NA	2020-02-15	2021-02-09	2	NA	383	361	22	male	38	28	No	Yes	No	Yes	No	No	No	No	No	No	No	No	99	18	No	No	No	No	No	No	No	No	No	2	1	Yes	No	No	Yes	No	Yes	No	No	Yes	Yes
R098	COVID-19	2020-01-26	2020-02-01	NA	2020-02-10	NA	7	NA	NA	NA	10	male	33	27	No	Yes	Yes	No	No	No	No	Yes	No	No	No	No	86	NA	No	No	No	No	No	No	No	No	No	NA	NA	NA	NA	NA	No	No	No	No	No	No	Yes
R099	COVID-19	2020-01-26	2020-01-31	NA	2020-02-29	NA	6	NA	NA	NA	30	female	54	26.4	No	No	No	No	Yes	No	No	No	No	No	No	No	79	NA	No	No	No	No	No	No	No	No	No	3	2	Yes	No	No	No	No	No	No	No	Yes	Yes
R100	COVID-19	2020-01-26	2020-01-28	NA	2020-02-21	NA	3	NA	NA	NA	25	female	45	27	No	No	Yes	No	No	No	No	No	No	No	No	No	78	20	No	No	No	No	No	No	No	No	No	6	3	Yes	Yes	No	No	No	No	Yes	Yes	Yes	Yes
R101	COVID-19	2020-01-30	2020-02-01	NA	2020-03-05	NA	3	NA	NA	NA	34	female	18	20.1	No	Yes	Yes	Yes	No	No	No	No	No	No	No	No	94	NA	No	No	No	No	No	No	No	No	No	NA	NA	NA	NA	NA	Yes	No	No	No	No	No	Yes
R102	COVID-19	2020-01-22	2020-01-25	NA	2020-02-19	2021-02-20	4	NA	396	368	26	female	37	21.5	No	No	No	Yes	Yes	Yes	No	No	No	No	Yes	No	80	18	No	No	No	No	No	No	No	No	No	3	2	Yes	No	No	Yes	Yes	No	No	No	Yes	Yes
R103	COVID-19	2020-01-21	2020-01-23	NA	2020-02-02	NA	3	NA	NA	NA	11	male	32	30.1	No	No	Yes	No	Yes	No	No	Yes	No	No	No	No	68	22	No	No	No	No	No	No	No	No	No	4	1	Yes	Yes	No	No	Yes	No	No	No	Yes	Yes
R104	COVID-19	2020-01-20	2020-01-27	NA	2020-02-22	2021-02-09	8	NA	387	354	27	female	50	24.8	No	Yes	Yes	Yes	Yes	No	No	No	No	No	No	Yes	86	18	Yes	No	No	No	No	No	No	No	No	5	4	Yes	No	No	No	No	No	Yes	Yes	Yes	Yes
R105	COVID-19	2020-01-21	2020-01-30	NA	2020-03-10	NA	10	NA	NA	NA	41	female	64	29.6	No	No	No	No	Yes	No	No	No	No	No	No	No	78	20	Yes	No	No	No	No	No	No	No	No	8	5	Yes	Yes	No	Yes	Yes	No	Yes	Yes	Yes	Yes
R106	COVID-19	2020-01-18	2020-01-21	NA	2020-02-11	NA	4	NA	NA	NA	22	male	39	25.1	No	No	Yes	Yes	Yes	No	No	No	No	No	No	No	100	20	No	No	No	No	No	No	No	No	No	7	4	Yes	Yes	No	Yes	Yes	Yes	Yes	No	Yes	Yes
R107	COVID-19	2020-01-22	2020-01-23	NA	2020-02-15	2021-02-10	2	NA	386	362	24	male	67	NA	No	Yes	Yes	No	No	No	No	No	Yes	No	No	No	87	20	No	No	No	No	No	No	Yes	No	No	2	1	Yes	No	No	Yes	Yes	Yes	No	No	No	Yes
R108	COVID-19	2020-01-27	2020-01-30	NA	2020-02-22	NA	4	NA	NA	NA	24	male	48	31.2	No	Yes	Yes	Yes	Yes	No	No	No	No	No	No	No	88	18	Yes	No	No	No	No	No	No	No	No	4	3	Yes	No	No	Yes	Yes	No	No	No	Yes	Yes
R109	COVID-19	2020-01-26	2020-01-29	NA	2020-03-04	2021-02-20	4	NA	392	354	36	female	41	NA	No	No	Yes	No	Yes	No	No	No	No	No	No	No	112	18	No	Yes	No	No	No	No	No	No	No	6	3	Yes	Yes	No	Yes	No	No	No	No	Yes	Yes
R110	COVID-19	2020-01-14	2020-01-26	NA	2020-02-12	NA	13	NA	NA	NA	18	female	41	24.5	No	Yes	No	Yes	Yes	Yes	No	No	No	No	No	No	78	19	No	No	No	No	No	No	No	No	Yes	6	2	Yes	No	Yes	Yes	No	Yes	No	No	No	Yes
R111	COVID-19	2020-01-25	2020-01-30	NA	2020-02-22	NA	6	NA	NA	NA	24	female	26	25	No	No	No	Yes	Yes	No	Yes	No	No	No	No	No	147	26	No	No	No	No	No	No	No	No	No	NA	NA	NA	NA	NA	No	No	No	No	Yes	Yes	No
R112	COVID-19	2020-01-12	2020-01-26	NA	2020-03-04	2021-02-07	15	NA	393	341	39	male	43	20.8	No	Yes	No	No	Yes	Yes	No	No	No	No	No	No	70	18	No	Yes	No	No	No	No	Yes	No	No	7	3	Yes	No	Yes	Yes	No	Yes	No	No	Yes	Yes
R113	COVID-19	2020-01-17	2020-01-27	NA	2020-02-05	2021-02-08	11	NA	389	370	10	female	48	22.3	No	No	Yes	No	No	No	No	No	Yes	No	No	No	82	20	No	No	No	No	No	No	No	No	No	8	4	Yes	No	Yes	No	No	No	No	No	No	Yes
R114	COVID-19	2020-02-01	2020-02-02	NA	2020-03-10	NA	2	NA	NA	NA	38	female	56	20.4	No	No	No	No	No	No	No	No	No	No	No	No	78	19	No	No	No	No	No	No	No	No	No	0	0	No	No	No	Yes	No	No	No	No	No	Yes
R115	COVID-19	2020-01-27	2020-01-30	NA	2020-02-15	NA	4	NA	NA	NA	17	male	63	22.6	No	No	Yes	No	No	No	No	No	No	No	No	No	70	18	No	No	No	No	Yes	No	No	No	No	NA	NA	NA	NA	NA	Yes	No	No	No	No	Yes	Yes
R116	COVID-19	2020-01-17	2020-01-27	NA	2020-02-03	2021-02-09	11	NA	390	373	8	female	47	23	No	Yes	No	Yes	No	No	No	No	No	No	No	No	78	18	No	No	No	Yes	No	No	No	No	No	2	1	Yes	No	No	No	No	No	No	No	No	Yes
R117	COVID-19	2020-01-27	2020-01-30	NA	2020-03-04	2021-02-09	4	NA	380	343	35	male	38	25.7	No	Yes	Yes	No	No	No	No	No	No	No	No	No	92	19	No	No	No	No	No	No	Yes	No	No	NA	NA	NA	NA	NA	Yes	No	No	No	No	Yes	Yes
R118	COVID-19	2020-01-21	2020-02-01	NA	2020-02-21	2021-02-20	12	NA	397	366	21	male	36	19.6	No	No	Yes	No	Yes	Yes	No	No	No	No	No	No	83	19	No	No	No	No	No	No	No	No	No	4	1	Yes	Yes	No	Yes	No	No	No	No	No	Yes
R119	COVID-19	2020-01-25	2020-01-30	NA	2020-02-22	NA	6	NA	NA	NA	24	male	80	NA	No	Yes	Yes	No	No	No	No	No	No	No	No	No	75	19	No	No	No	No	Yes	No	No	No	No	NA	NA	NA	NA	NA	Yes	No	No	No	No	No	Yes
R120	COVID-19	2020-02-02	2020-02-03	NA	2020-03-02	NA	2	NA	NA	NA	29	female	4	16	No	No	Yes	No	No	No	Yes	No	No	No	No	No	115	21	No	No	No	No	No	No	No	No	No	0	0	No	No	No	No	No	Yes	No	No	No	Yes
R121	COVID-19	2020-01-23	2020-01-24	2020-01-27	2020-03-03	2021-02-10	2	4	385	345	40	female	52	NA	Yes	No	Yes	No	No	No	No	No	Yes	No	No	Yes	100	18	No	No	No	No	No	No	No	No	No	6	5	Yes	No	No	Yes	Yes	No	No	No	Yes	Yes
R122	COVID-19	2020-01-23	2020-01-30	NA	2020-02-10	2021-02-09	8	NA	384	366	12	female	56	21.4	No	Yes	Yes	No	Yes	No	No	No	No	No	No	No	74	NA	No	No	No	No	No	No	No	No	No	6	5	Yes	No	No	No	No	No	No	No	Yes	Yes
R123	COVID-19	2020-01-27	2020-01-30	NA	2020-03-10	2021-02-20	4	NA	391	348	41	female	40	21.1	No	Yes	Yes	No	No	No	No	No	No	No	No	No	90	18	No	No	No	No	No	No	No	No	No	5	2	Yes	Yes	No	Yes	Yes	No	Yes	Yes	Yes	Yes
R124	COVID-19	2020-01-09	2020-01-19	2020-01-19	2020-02-21	2021-02-08	11	1	397	354	34	female	55	NA	Yes	No	Yes	No	Yes	No	No	No	Yes	Yes	Yes	No	95	20	No	No	No	No	No	No	No	No	No	11	5	Yes	Yes	Yes	Yes	Yes	No	Yes	Yes	Yes	Yes
R125	COVID-19	2020-01-12	2020-01-17	2020-01-18	2020-01-31	NA	6	2	NA	NA	15	female	62	22.3	Yes	No	Yes	Yes	No	No	No	No	Yes	No	No	No	84	19	No	No	No	Yes	No	No	No	No	No	7	1	Yes	Yes	Yes	No	Yes	Yes	Yes	Yes	Yes	Yes
R126	COVID-19	2020-01-20	2020-01-30	NA	2020-02-09	2021-02-09	11	NA	387	367	11	female	43	23.7	No	No	Yes	No	No	No	No	No	No	No	No	No	94	16	No	No	No	No	No	No	No	No	No	4	1	Yes	Yes	No	No	No	No	No	No	Yes	Yes
R127	COVID-19	2020-01-23	2020-01-25	2020-01-27	2020-02-09	2021-02-20	3	3	395	378	16	male	30	28	Yes	No	Yes	No	No	No	No	No	Yes	No	Yes	No	83	18	No	No	No	No	No	No	Yes	No	No	11	5	Yes	Yes	Yes	Yes	Yes	No	Yes	Yes	Yes	Yes
R128	COVID-19	2020-02-14	2020-02-20	2020-02-22	2020-03-10	2021-02-10	7	3	363	338	20	male	79	21.6	Yes	No	Yes	No	No	No	No	Yes	No	No	No	No	81	18	Yes	Yes	No	No	No	No	No	No	No	5	4	Yes	No	No	Yes	No	No	Yes	Yes	Yes	Yes
R129	COVID-19	2020-02-12	2020-02-15	NA	2020-03-11	NA	4	NA	NA	NA	26	female	48	19.5	No	No	Yes	No	No	No	No	No	Yes	No	No	No	96	20	No	No	No	No	Yes	No	No	No	No	11	5	Yes	Yes	Yes	Yes	No	No	No	No	Yes	Yes
R130	COVID-19	2020-02-14	2020-02-15	2020-02-15	2020-03-07	2021-02-10	2	1	363	341	22	female	77	26.2	Yes	Yes	Yes	No	No	No	No	Yes	No	No	No	No	91	12	Yes	Yes	No	No	No	No	No	No	No	8	5	Yes	Yes	No	Yes	Yes	No	Yes	Yes	Yes	Yes
R131	COVID-19	2020-02-04	2020-02-13	NA	2020-02-28	2021-02-10	10	NA	373	349	16	female	74	21.4	No	Yes	Yes	No	No	No	No	No	No	No	No	No	80	18	No	No	No	No	No	No	No	No	No	6	5	Yes	No	No	Yes	No	No	No	No	Yes	Yes
R132	COVID-19	2020-01-30	2020-02-11	NA	2020-03-10	NA	13	NA	NA	NA	29	female	30	21	No	No	No	Yes	Yes	Yes	No	Yes	No	No	No	No	78	18	No	No	No	No	No	No	No	No	No	4	3	Yes	No	No	Yes	No	No	No	No	Yes	Yes
R133	COVID-19	2020-02-02	2020-02-10	NA	2020-03-03	NA	9	NA	NA	NA	23	female	51	24.8	No	Yes	Yes	No	No	No	No	No	No	No	No	No	60	18	No	No	No	No	No	No	No	No	No	8	2	Yes	Yes	Yes	Yes	No	No	No	No	Yes	Yes
R134	COVID-19	2020-01-27	2020-02-10	NA	2020-03-04	2021-02-09	15	NA	380	343	24	male	54	24.4	No	No	No	No	Yes	Yes	No	No	No	No	No	No	64	18	No	No	No	No	No	No	No	No	No	8	4	Yes	No	Yes	Yes	No	No	No	No	Yes	Yes
R135	COVID-19	2020-01-31	2020-02-10	2020-02-12	2020-03-03	NA	11	3	NA	NA	23	male	33	26.4	Yes	No	Yes	No	Yes	No	No	No	No	No	No	No	84	18	No	No	No	No	No	No	No	No	Yes	11	5	Yes	Yes	Yes	Yes	No	No	Yes	Yes	Yes	Yes
R136	COVID-19	2020-01-30	2020-02-09	2020-02-09	2020-03-07	2021-02-09	11	1	377	340	28	female	51	NA	Yes	No	Yes	No	Yes	No	No	Yes	No	No	No	No	65	22	No	No	No	No	No	No	No	No	No	8	4	Yes	No	Yes	Yes	No	No	Yes	Yes	Yes	Yes
R137	COVID-19	2020-01-26	2020-02-09	2020-02-11	2020-03-03	NA	15	3	NA	NA	24	male	55	24.5	Yes	No	Yes	No	Yes	No	No	No	No	No	No	No	105	19	No	No	No	No	No	No	No	No	No	11	5	Yes	Yes	Yes	Yes	No	No	Yes	Yes	Yes	Yes
R138	COVID-19	2020-01-23	2020-02-09	NA	2020-03-10	NA	18	NA	NA	NA	31	female	68	27.8	No	No	Yes	No	Yes	No	No	No	No	No	No	No	90	19	Yes	No	No	No	No	No	No	No	No	NA	NA	NA	NA	NA	Yes	No	No	No	No	Yes	Yes
R139	COVID-19	2020-02-01	2020-02-09	NA	2020-02-20	NA	9	NA	NA	NA	12	male	45	26.4	No	No	No	No	No	No	No	Yes	Yes	No	No	No	94	19	No	No	No	No	No	No	No	No	No	5	4	Yes	No	No	No	No	No	No	No	Yes	Yes
R140	COVID-19	2020-02-01	2020-02-09	2020-02-09	2020-02-26	NA	9	1	NA	NA	18	female	65	22.2	Yes	No	No	No	Yes	Yes	No	No	No	No	No	No	75	20	No	No	No	No	No	No	No	No	No	8	5	Yes	Yes	No	Yes	No	No	Yes	Yes	Yes	Yes
R141	COVID-19	2020-02-04	2020-02-08	NA	2020-02-21	NA	5	NA	NA	NA	14	female	42	20.1	No	No	Yes	No	No	No	No	No	No	No	No	No	78	18	No	No	No	No	No	Yes	No	No	No	NA	NA	NA	NA	NA	Yes	No	No	No	No	Yes	Yes
R142	COVID-19	2020-02-03	2020-02-08	2020-02-08	2020-02-26	2021-02-08	6	1	372	349	19	female	67	27.3	Yes	Yes	Yes	No	No	No	No	No	No	No	No	No	85	19	No	No	No	No	No	No	No	No	No	7	3	Yes	No	Yes	Yes	Yes	No	No	Yes	Yes	Yes
R143	COVID-19	2020-01-31	2020-02-08	NA	2020-03-03	NA	9	NA	NA	NA	25	male	64	23.7	No	No	Yes	Yes	No	No	No	No	No	No	No	No	76	18	No	No	No	No	No	No	No	No	No	7	3	Yes	No	Yes	Yes	Yes	No	No	Yes	Yes	Yes
R144	COVID-19	2020-01-31	2020-02-07	2020-02-09	2020-03-08	NA	8	3	NA	NA	31	male	65	25.7	Yes	Yes	Yes	No	No	No	No	No	No	No	No	No	72	20	No	No	No	No	No	No	No	No	No	11	5	Yes	Yes	Yes	Yes	No	No	Yes	No	Yes	Yes
HC1	HC	NA	NA	NA	NA	NA	NA	NA	NA	NA	NA	male	37	23.7011	NA	NA	NA	NA	NA	NA	NA	NA	NA	NA	NA	NA	NA	NA	NA	NA	NA	NA	NA	NA	NA	NA	NA	0	0	0	0	0	NA	NA	NA	NA	NA	NA	NA
HC2	HC	NA	NA	NA	NA	NA	NA	NA	NA	NA	NA	female	62	23.3937	NA	NA	NA	NA	NA	NA	NA	NA	NA	NA	NA	NA	NA	NA	NA	NA	NA	NA	NA	NA	NA	NA	NA	2	1	1	0	0	NA	NA	NA	NA	NA	NA	NA
HC3	HC	NA	NA	NA	NA	NA	NA	NA	NA	NA	NA	male	25	15.741	NA	NA	NA	NA	NA	NA	NA	NA	NA	NA	NA	NA	NA	NA	NA	NA	NA	NA	NA	NA	NA	NA	NA	NA	NA	NA	NA	NA	NA	NA	NA	NA	NA	NA	NA
HC4	HC	NA	NA	NA	NA	NA	NA	NA	NA	NA	NA	male	60	24.4983	NA	NA	NA	NA	NA	NA	NA	NA	NA	NA	NA	NA	NA	NA	NA	NA	NA	NA	NA	NA	NA	NA	NA	0	0	0	0	0	NA	NA	NA	NA	NA	NA	NA
HC5	HC	NA	NA	NA	NA	NA	NA	NA	NA	NA	NA	male	24	23.0045	NA	NA	NA	NA	NA	NA	NA	NA	NA	NA	NA	NA	NA	NA	NA	NA	NA	NA	NA	NA	NA	NA	NA	NA	NA	NA	NA	NA	NA	NA	NA	NA	NA	NA	NA
HC6	HC	NA	NA	NA	NA	NA	NA	NA	NA	NA	NA	female	73	23.2	NA	NA	NA	NA	NA	NA	NA	NA	NA	NA	NA	NA	NA	NA	NA	NA	NA	NA	NA	NA	NA	NA	NA	NA	NA	NA	NA	NA	NA	NA	NA	NA	NA	NA	NA
HC7	HC	NA	NA	NA	NA	NA	NA	NA	NA	NA	NA	male	58	27.7	NA	NA	NA	NA	NA	NA	NA	NA	NA	NA	NA	NA	NA	NA	NA	NA	NA	NA	NA	NA	NA	NA	NA	4	1	0	0	1	NA	NA	NA	NA	NA	NA	NA
HC8	HC	NA	NA	NA	NA	NA	NA	NA	NA	NA	NA	male	54	26.5684	NA	NA	NA	NA	NA	NA	NA	NA	NA	NA	NA	NA	NA	NA	NA	NA	NA	NA	NA	NA	NA	NA	NA	0	0	0	0	0	NA	NA	NA	NA	NA	NA	NA
HC9	HC	NA	NA	NA	NA	NA	NA	NA	NA	NA	NA	male	82	21.4629	NA	NA	NA	NA	NA	NA	NA	NA	NA	NA	NA	NA	NA	NA	NA	NA	NA	NA	NA	NA	NA	NA	NA	NA	NA	NA	NA	NA	NA	NA	NA	NA	NA	NA	NA
HC10	HC	NA	NA	NA	NA	NA	NA	NA	NA	NA	NA	male	47	24.2268	NA	NA	NA	NA	NA	NA	NA	NA	NA	NA	NA	NA	NA	NA	NA	NA	NA	NA	NA	NA	NA	NA	NA	4	1	0	0	1	NA	NA	NA	NA	NA	NA	NA
HC11	HC	NA	NA	NA	NA	NA	NA	NA	NA	NA	NA	male	63	22.8336	NA	NA	NA	NA	NA	NA	NA	NA	NA	NA	NA	NA	NA	NA	NA	NA	NA	NA	NA	NA	NA	NA	NA	5	2	0	0	1	NA	NA	NA	NA	NA	NA	NA
HC12	HC	NA	NA	NA	NA	NA	NA	NA	NA	NA	NA	female	34	22.6008	NA	NA	NA	NA	NA	NA	NA	NA	NA	NA	NA	NA	NA	NA	NA	NA	NA	NA	NA	NA	NA	NA	NA	NA	NA	NA	NA	NA	NA	NA	NA	NA	NA	NA	NA
HC13	HC	NA	NA	NA	NA	NA	NA	NA	NA	NA	NA	male	49	25.2344	NA	NA	NA	NA	NA	NA	NA	NA	NA	NA	NA	NA	NA	NA	NA	NA	NA	NA	NA	NA	NA	NA	NA	4	1	0	0	1	NA	NA	NA	NA	NA	NA	NA
HC14	HC	NA	NA	NA	NA	NA	NA	NA	NA	NA	NA	female	33	23.3876	NA	NA	NA	NA	NA	NA	NA	NA	NA	NA	NA	NA	NA	NA	NA	NA	NA	NA	NA	NA	NA	NA	NA	NA	NA	NA	NA	NA	NA	NA	NA	NA	NA	NA	NA
HC15	HC	NA	NA	NA	NA	NA	NA	NA	NA	NA	NA	female	50	21.6193	NA	NA	NA	NA	NA	NA	NA	NA	NA	NA	NA	NA	NA	NA	NA	NA	NA	NA	NA	NA	NA	NA	NA	4	1	0	0	1	NA	NA	NA	NA	NA	NA	NA
HC16	HC	NA	NA	NA	NA	NA	NA	NA	NA	NA	NA	female	49	27.1706	NA	NA	NA	NA	NA	NA	NA	NA	NA	NA	NA	NA	NA	NA	NA	NA	NA	NA	NA	NA	NA	NA	NA	0	0	0	0	0	NA	NA	NA	NA	NA	NA	NA
HC17	HC	NA	NA	NA	NA	NA	NA	NA	NA	NA	NA	female	51	25.5777	NA	NA	NA	NA	NA	NA	NA	NA	NA	NA	NA	NA	NA	NA	NA	NA	NA	NA	NA	NA	NA	NA	NA	0	0	0	0	0	NA	NA	NA	NA	NA	NA	NA
HC18	HC	NA	NA	NA	NA	NA	NA	NA	NA	NA	NA	male	61	25.4088	NA	NA	NA	NA	NA	NA	NA	NA	NA	NA	NA	NA	NA	NA	NA	NA	NA	NA	NA	NA	NA	NA	NA	4	1	0	0	1	NA	NA	NA	NA	NA	NA	NA
HC19	HC	NA	NA	NA	NA	NA	NA	NA	NA	NA	NA	female	41	22.5182	NA	NA	NA	NA	NA	NA	NA	NA	NA	NA	NA	NA	NA	NA	NA	NA	NA	NA	NA	NA	NA	NA	NA	4	1	0	0	1	NA	NA	NA	NA	NA	NA	NA
HC20	HC	NA	NA	NA	NA	NA	NA	NA	NA	NA	NA	female	43	25.6387	NA	NA	NA	NA	NA	NA	NA	NA	NA	NA	NA	NA	NA	NA	NA	NA	NA	NA	NA	NA	NA	NA	NA	2	1	1	0	0	NA	NA	NA	NA	NA	NA	NA
HC21	HC	NA	NA	NA	NA	NA	NA	NA	NA	NA	NA	female	26	24.3484	NA	NA	NA	NA	NA	NA	NA	NA	NA	NA	NA	NA	NA	NA	NA	NA	NA	NA	NA	NA	NA	NA	NA	0	0	0	0	0	NA	NA	NA	NA	NA	NA	NA
HC22	HC	NA	NA	NA	NA	NA	NA	NA	NA	NA	NA	male	32	27.1084	NA	NA	NA	NA	NA	NA	NA	NA	NA	NA	NA	NA	NA	NA	NA	NA	NA	NA	NA	NA	NA	NA	NA	0	0	0	0	0	NA	NA	NA	NA	NA	NA	NA
HC23	HC	NA	NA	NA	NA	NA	NA	NA	NA	NA	NA	male	38	24.2972	NA	NA	NA	NA	NA	NA	NA	NA	NA	NA	NA	NA	NA	NA	NA	NA	NA	NA	NA	NA	NA	NA	NA	4	1	0	0	1	NA	NA	NA	NA	NA	NA	NA
HC24	HC	NA	NA	NA	NA	NA	NA	NA	NA	NA	NA	female	43	22.4905	NA	NA	NA	NA	NA	NA	NA	NA	NA	NA	NA	NA	NA	NA	NA	NA	NA	NA	NA	NA	NA	NA	NA	4	1	0	0	1	NA	NA	NA	NA	NA	NA	NA
HC25	HC	NA	NA	NA	NA	NA	NA	NA	NA	NA	NA	female	29	21.2515	NA	NA	NA	NA	NA	NA	NA	NA	NA	NA	NA	NA	NA	NA	NA	NA	NA	NA	NA	NA	NA	NA	NA	0	0	0	0	0	NA	NA	NA	NA	NA	NA	NA
HC26	HC	NA	NA	NA	NA	NA	NA	NA	NA	NA	NA	male	58	25.1395	NA	NA	NA	NA	NA	NA	NA	NA	NA	NA	NA	NA	NA	NA	NA	NA	NA	NA	NA	NA	NA	NA	NA	0	0	0	0	0	NA	NA	NA	NA	NA	NA	NA
HC27	HC	NA	NA	NA	NA	NA	NA	NA	NA	NA	NA	male	50	25.2214	NA	NA	NA	NA	NA	NA	NA	NA	NA	NA	NA	NA	NA	NA	NA	NA	NA	NA	NA	NA	NA	NA	NA	NA	NA	NA	NA	NA	NA	NA	NA	NA	NA	NA	NA
HC28	HC	NA	NA	NA	NA	NA	NA	NA	NA	NA	NA	female	64	26.9808	NA	NA	NA	NA	NA	NA	NA	NA	NA	NA	NA	NA	NA	NA	NA	NA	NA	NA	NA	NA	NA	NA	NA	7	3	1	0	1	NA	NA	NA	NA	NA	NA	NA
HC29	HC	NA	NA	NA	NA	NA	NA	NA	NA	NA	NA	female	49	35.2	NA	NA	NA	NA	NA	NA	NA	NA	NA	NA	NA	NA	NA	NA	NA	NA	NA	NA	NA	NA	NA	NA	NA	5	2	0	0	1	NA	NA	NA	NA	NA	NA	NA
HC30	HC	NA	NA	NA	NA	NA	NA	NA	NA	NA	NA	male	45	22.6	NA	NA	NA	NA	NA	NA	NA	NA	NA	NA	NA	NA	NA	NA	NA	NA	NA	NA	NA	NA	NA	NA	NA	2	1	1	0	0	NA	NA	NA	NA	NA	NA	NA
HC31	HC	NA	NA	NA	NA	NA	NA	NA	NA	NA	NA	male	50	23.5	NA	NA	NA	NA	NA	NA	NA	NA	NA	NA	NA	NA	NA	NA	NA	NA	NA	NA	NA	NA	NA	NA	NA	0	0	0	0	0	NA	NA	NA	NA	NA	NA	NA
HC32	HC	NA	NA	NA	NA	NA	NA	NA	NA	NA	NA	female	47	22.5	NA	NA	NA	NA	NA	NA	NA	NA	NA	NA	NA	NA	NA	NA	NA	NA	NA	NA	NA	NA	NA	NA	NA	NA	NA	NA	NA	NA	NA	NA	NA	NA	NA	NA	NA
HC33	HC	NA	NA	NA	NA	NA	NA	NA	NA	NA	NA	male	55	26.7	NA	NA	NA	NA	NA	NA	NA	NA	NA	NA	NA	NA	NA	NA	NA	NA	NA	NA	NA	NA	NA	NA	NA	0	0	0	0	0	NA	NA	NA	NA	NA	NA	NA
HC34	HC	NA	NA	NA	NA	NA	NA	NA	NA	NA	NA	female	35	21.4	NA	NA	NA	NA	NA	NA	NA	NA	NA	NA	NA	NA	NA	NA	NA	NA	NA	NA	NA	NA	NA	NA	NA	NA	NA	NA	NA	NA	NA	NA	NA	NA	NA	NA	NA
HC35	HC	NA	NA	NA	NA	NA	NA	NA	NA	NA	NA	male	39	17.8	NA	NA	NA	NA	NA	NA	NA	NA	NA	NA	NA	NA	NA	NA	NA	NA	NA	NA	NA	NA	NA	NA	NA	4	1	0	0	1	NA	NA	NA	NA	NA	NA	NA
HC36	HC	NA	NA	NA	NA	NA	NA	NA	NA	NA	NA	male	56	25.7	NA	NA	NA	NA	NA	NA	NA	NA	NA	NA	NA	NA	NA	NA	NA	NA	NA	NA	NA	NA	NA	NA	NA	7	3	1	0	1	NA	NA	NA	NA	NA	NA	NA
HC37	HC	NA	NA	NA	NA	NA	NA	NA	NA	NA	NA	male	42	29.4	NA	NA	NA	NA	NA	NA	NA	NA	NA	NA	NA	NA	NA	NA	NA	NA	NA	NA	NA	NA	NA	NA	NA	0	0	0	0	0	NA	NA	NA	NA	NA	NA	NA
HC38	HC	NA	NA	NA	NA	NA	NA	NA	NA	NA	NA	female	35	23.9	NA	NA	NA	NA	NA	NA	NA	NA	NA	NA	NA	NA	NA	NA	NA	NA	NA	NA	NA	NA	NA	NA	NA	4	1	0	0	1	NA	NA	NA	NA	NA	NA	NA
HC39	HC	NA	NA	NA	NA	NA	NA	NA	NA	NA	NA	male	62	21.7	NA	NA	NA	NA	NA	NA	NA	NA	NA	NA	NA	NA	NA	NA	NA	NA	NA	NA	NA	NA	NA	NA	NA	9	5	1	0	1	NA	NA	NA	NA	NA	NA	NA
HC40	HC	NA	NA	NA	NA	NA	NA	NA	NA	NA	NA	male	70	23.9	NA	NA	NA	NA	NA	NA	NA	NA	NA	NA	NA	NA	NA	NA	NA	NA	NA	NA	NA	NA	NA	NA	NA	5	2	0	0	1	NA	NA	NA	NA	NA	NA	NA
[truncated: 67 more columns]
