# Supplementary material for: Pulmonary and Renal Long COVID at Two-year Revisit
Source: Research Square preprint supplement (doi:10.21203/rs.3.rs-1513873/v1), 2022-04-19
Supplement: Supplementary file 2 [file TableS2.xlsx]

## Sheet: Sheet1
Seq	PatientID	Identifier	Gender	Age	Severe type	Date				Time intervals		Chest CT					Omics dataa										RNA				Renal function
Seq	Patient ID	Identifier	Gender	Age	Severe type	Admission	Discharge	Onset	Sampling time	Sampling from admission	Sampling from onset	Lobes involved	Pathy/GGO	Consolidation	Fibrosis	CT score	SP1	SP2	SP3	SP4	SP5	SM1	UP1	UP2	UP3	UM1	Nasopharyngeal swab RNA	Sputum RNA	Stool RNA	Throat swab RNA	Creatinine(μmol/L)	Estimated glomerular filtration rate(mL/min/1.73m2)	Retinol binding protein(mg/L)	Urea (mmol/L)	Uric acid(μmol/L)	Urine PH	Urine specific gravity	Urine VitC	Urinary occult blood	Urine protein	Urine glucose	Urinary nitrite	Urine ketone	Urine leukocyte	Urobilinogen	Urobilirubin	Urine small round epithelial cells(/μL)	Urine white blood cell(/HP)	Urine white blood cells(/μL)
R001	50150498	R001_1	female	62	Severe	2020-01-20	2020-02-15	2020-01-20	2020-01-20	1	1	NA	NA	NA	NA	NA	NA	NA	NA	NA	NA	NA	NA	NA	NA	NA	NA	NA	NA	NA	NA	NA	NA	NA	NA	NA	NA	NA	NA	NA	NA	NA	NA	NA	NA	NA	NA	NA	NA
R001	50150498	R001_10	female	62	Severe	2020-01-20	2020-02-15	2020-01-20	2020-01-29	10	10	NA	NA	NA	NA	NA	NA	NA	NA	NA	NA	NA	NA	NA	NA	NA	NA	NA	NA	NA	NA	NA	NA	NA	NA	NA	NA	NA	NA	NA	NA	NA	NA	NA	NA	NA	NA	NA	NA
R001	50150498	R001_11	female	62	Severe	2020-01-20	2020-02-15	2020-01-20	2020-01-30	11	11	NA	NA	NA	NA	NA	NA	NA	NA	NA	NA	NA	NA	NA	NA	NA	NA	NA	NA	negative	NA	NA	NA	NA	NA	NA	NA	NA	NA	NA	NA	NA	NA	NA	NA	NA	NA	NA	NA
R001	50150498	R001_12	female	62	Severe	2020-01-20	2020-02-15	2020-01-20	2020-01-31	12	12	NA	NA	NA	NA	NA	NA	NA	NA	NA	NA	NA	NA	NA	NA	NA	NA	NA	NA	positive	NA	NA	NA	NA	NA	NA	NA	NA	NA	NA	NA	NA	NA	NA	NA	NA	NA	NA	NA
R001	50150498	R001_120	female	62	Severe	2020-01-20	2020-02-15	2020-01-20	2020-05-18	120	120	NA	NA	NA	NA	NA	NA	NA	NA	NA	NA	NA	NA	NA	NA	NA	NA	negative	NA	NA	69	81	NA	5.78	462	5	1.02	negative	1+	negative	negative	negative	negative	negative	negative	negative	0	2	10
R001	50150498	R001_14	female	62	Severe	2020-01-20	2020-02-15	2020-01-20	2020-02-02	14	14	NA	NA	NA	NA	NA	NA	Yes	Yes	Yes	NA	NA	NA	NA	NA	NA	NA	NA	NA	NA	53	98	52.4	7.99	220	NA	NA	NA	NA	NA	NA	NA	NA	NA	NA	NA	NA	NA	NA
R001	50150498	R001_17	female	62	Severe	2020-01-20	2020-02-15	2020-01-20	2020-02-05	17	17	NA	NA	NA	NA	NA	NA	NA	Yes	Yes	NA	NA	NA	NA	NA	NA	NA	NA	NA	negative	45	103	42.6	4.45	189	NA	NA	NA	NA	NA	NA	NA	NA	NA	NA	NA	NA	NA	NA
R001	50150498	R001_18	female	62	Severe	2020-01-20	2020-02-15	2020-01-20	2020-02-06	18	18	NA	NA	NA	NA	NA	NA	NA	Yes	Yes	NA	NA	NA	NA	NA	NA	NA	NA	NA	negative	50.5	99.5	42.15	4.405	193	NA	NA	NA	NA	NA	NA	NA	NA	NA	NA	NA	NA	NA	NA
R001	50150498	R001_19	female	62	Severe	2020-01-20	2020-02-15	2020-01-20	2020-02-07	19	19	NA	NA	NA	NA	NA	NA	NA	NA	NA	NA	NA	NA	NA	NA	NA	NA	NA	negative	NA	NA	NA	NA	NA	NA	NA	NA	NA	NA	NA	NA	NA	NA	NA	NA	NA	NA	NA	NA
R001	50150498	R001_2	female	62	Severe	2020-01-20	2020-02-15	2020-01-20	2020-01-21	2	2	5	Yes	No	No	6	NA	NA	NA	NA	NA	NA	NA	NA	NA	NA	NA	NA	NA	NA	73	76	34.2	3.95	257	6	1.015	3+	negative	negative	negative	negative	negative	negative	negative	negative	0	3	17
R001	50150498	R001_24	female	62	Severe	2020-01-20	2020-02-15	2020-01-20	2020-02-12	24	24	NA	NA	NA	NA	NA	NA	NA	NA	NA	NA	NA	NA	NA	NA	NA	NA	NA	NA	NA	48	101	NA	4.55	183	NA	NA	NA	NA	NA	NA	NA	NA	NA	NA	NA	NA	NA	NA
R001	50150498	R001_25	female	62	Severe	2020-01-20	2020-02-15	2020-01-20	2020-02-13	25	25	5	Yes	Yes	No	8	NA	NA	Yes	Yes	NA	NA	NA	NA	NA	NA	NA	NA	NA	NA	51	99	39.3	3.85	213	NA	NA	NA	NA	NA	NA	NA	NA	NA	NA	NA	NA	NA	NA
R001	50150498	R001_26	female	62	Severe	2020-01-20	2020-02-15	2020-01-20	2020-02-14	26	26	NA	NA	NA	NA	NA	NA	Yes	Yes	Yes	NA	NA	NA	NA	NA	NA	NA	NA	NA	NA	49	101	39.8	4.06	225	NA	NA	NA	NA	NA	NA	NA	NA	NA	NA	NA	NA	NA	NA
R001	50150498	R001_3	female	62	Severe	2020-01-20	2020-02-15	2020-01-20	2020-01-22	3	3	NA	NA	NA	NA	NA	NA	NA	NA	NA	NA	NA	NA	NA	NA	NA	NA	NA	NA	NA	NA	NA	NA	NA	NA	NA	NA	NA	NA	NA	NA	NA	NA	NA	NA	NA	NA	NA	NA
R001	50150498	R001_388	female	62	Severe	2020-01-20	2020-02-15	2020-01-20	2021-02-10	388	388	0	No	No	No	0	NA	Yes	NA	NA	NA	NA	NA	NA	NA	NA	NA	negative	NA	NA	54	97	61.3	5.18	345	7	1.013	NA	1+	NA	negative	negative	negative	1+	negative	negative	NA	NA	3
R001	50150498	R001_4	female	62	Severe	2020-01-20	2020-02-15	2020-01-20	2020-01-23	4	4	NA	NA	NA	NA	NA	NA	NA	NA	NA	NA	NA	NA	NA	NA	NA	NA	NA	NA	NA	NA	NA	NA	NA	NA	NA	NA	NA	NA	NA	NA	NA	NA	NA	NA	NA	NA	NA	NA
R001	50150498	R001_41	female	62	Severe	2020-01-20	2020-02-15	2020-01-20	2020-02-29	41	41	NA	NA	NA	NA	NA	NA	NA	NA	NA	NA	NA	NA	NA	NA	NA	NA	negative	negative	NA	50	100	NA	2.75	278	7	1.02	negative	3+	negative	negative	negative	negative	negative	negative	negative	0	3	14
R001	50150498	R001_5	female	62	Severe	2020-01-20	2020-02-15	2020-01-20	2020-01-24	5	5	NA	NA	NA	NA	NA	Yes	NA	Yes	NA	NA	NA	NA	NA	NA	NA	NA	NA	NA	NA	70	80	NA	5.15	170	NA	NA	NA	NA	NA	NA	NA	NA	NA	NA	NA	NA	NA	NA
R001	50150498	R001_57	female	62	Severe	2020-01-20	2020-02-15	2020-01-20	2020-03-16	57	57	NA	NA	NA	NA	NA	NA	NA	NA	NA	NA	NA	NA	NA	NA	NA	NA	negative	negative	NA	55	97	NA	3.17	311	6	1.02	negative	3+	negative	negative	negative	negative	+-	negative	negative	0	7	39
R001	50150498	R001_6	female	62	Severe	2020-01-20	2020-02-15	2020-01-20	2020-01-25	6	6	NA	NA	NA	NA	NA	NA	NA	NA	NA	NA	NA	NA	NA	NA	NA	NA	NA	NA	NA	NA	NA	NA	NA	NA	NA	NA	NA	NA	NA	NA	NA	NA	NA	NA	NA	NA	NA	NA
R001	50150498	R001_753	female	62	Severe	2020-01-20	2020-02-15	2020-01-20	2022-02-10	753	753	NA	NA	NA	NA	NA	NA	NA	NA	NA	NA	NA	NA	NA	NA	NA	NA	NA	NA	NA	67	83	46.3	5.65	367	5.5	1.005	negative	1+	negative	negative	negative	negative	1+	negative	negative	0	4	22
R001	50150498	R001_8	female	62	Severe	2020-01-20	2020-02-15	2020-01-20	2020-01-27	8	8	NA	NA	NA	NA	NA	NA	NA	NA	NA	NA	Yes	NA	NA	NA	NA	NA	NA	NA	negative	NA	NA	NA	NA	NA	NA	NA	NA	NA	NA	NA	NA	NA	NA	NA	NA	NA	NA	NA
R001	50150498	R001_9	female	62	Severe	2020-01-20	2020-02-15	2020-01-20	2020-01-28	9	9	NA	NA	NA	NA	NA	NA	NA	NA	NA	NA	NA	NA	NA	NA	NA	NA	NA	NA	negative	55	97	26.9	6.67	176	NA	NA	NA	NA	NA	NA	NA	NA	NA	NA	NA	NA	NA	NA
R002	50150697	R002_10	male	54	Severe	2020-01-23	2020-02-08	2020-01-21	2020-01-30	8	10	NA	NA	NA	NA	NA	NA	NA	Yes	Yes	NA	NA	NA	NA	NA	NA	NA	NA	NA	positive	NA	NA	NA	NA	NA	NA	NA	NA	NA	NA	NA	NA	NA	NA	NA	NA	NA	NA	NA
R002	50150697	R002_11	male	54	Severe	2020-01-23	2020-02-08	2020-01-21	2020-01-31	9	11	NA	NA	NA	NA	NA	NA	NA	NA	NA	NA	NA	NA	NA	NA	NA	NA	NA	NA	NA	NA	NA	NA	NA	NA	NA	NA	NA	NA	NA	NA	NA	NA	NA	NA	NA	NA	NA	NA
R002	50150697	R002_15	male	54	Severe	2020-01-23	2020-02-08	2020-01-21	2020-02-04	13	15	NA	NA	NA	NA	NA	NA	NA	NA	NA	NA	NA	NA	NA	NA	NA	NA	NA	NA	negative	NA	NA	NA	NA	NA	NA	NA	NA	NA	NA	NA	NA	NA	NA	NA	NA	NA	NA	NA
R002	50150697	R002_17	male	54	Severe	2020-01-23	2020-02-08	2020-01-21	2020-02-06	15	17	NA	NA	NA	NA	NA	NA	NA	Yes	Yes	NA	NA	NA	NA	NA	NA	NA	NA	positive	negative	69	102	37.6	3.29	276	NA	NA	NA	NA	NA	NA	NA	NA	NA	NA	NA	NA	NA	NA
R002	50150697	R002_18	male	54	Severe	2020-01-23	2020-02-08	2020-01-21	2020-02-07	16	18	3	Yes	No	No	4	NA	NA	NA	NA	NA	NA	NA	NA	NA	NA	NA	NA	positive	NA	NA	NA	NA	NA	NA	NA	NA	NA	NA	NA	NA	NA	NA	NA	NA	NA	NA	NA	NA
R002	50150697	R002_19	male	54	Severe	2020-01-23	2020-02-08	2020-01-21	2020-02-08	17	19	NA	NA	NA	NA	NA	NA	NA	NA	NA	NA	NA	NA	NA	NA	Yes	NA	NA	NA	NA	NA	NA	NA	NA	NA	NA	NA	NA	NA	NA	NA	NA	NA	NA	NA	NA	NA	NA	NA
R002	50150697	R002_3	male	54	Severe	2020-01-23	2020-02-08	2020-01-21	2020-01-23	1	3	3	Yes	Yes	No	6	NA	NA	NA	NA	NA	Yes	NA	NA	NA	NA	NA	positive	NA	NA	NA	NA	NA	NA	NA	NA	NA	NA	NA	NA	NA	NA	NA	NA	NA	NA	NA	NA	NA
R002	50150697	R002_33	male	54	Severe	2020-01-23	2020-02-08	2020-01-21	2020-02-22	31	33	NA	NA	NA	NA	NA	NA	NA	NA	NA	NA	NA	NA	NA	NA	NA	NA	positive	positive	NA	NA	NA	NA	NA	NA	NA	NA	NA	NA	NA	NA	NA	NA	NA	NA	NA	NA	NA	NA
R002	50150697	R002_36	male	54	Severe	2020-01-23	2020-02-08	2020-01-21	2020-02-25	34	36	NA	NA	NA	NA	NA	NA	NA	NA	NA	NA	NA	NA	NA	NA	NA	NA	NA	NA	NA	NA	NA	NA	NA	NA	NA	NA	NA	NA	NA	NA	NA	NA	NA	NA	NA	NA	NA	NA
R002	50150697	R002_38	male	54	Severe	2020-01-23	2020-02-08	2020-01-21	2020-02-27	36	38	NA	NA	NA	NA	NA	NA	NA	NA	NA	NA	NA	NA	NA	NA	NA	NA	positive	negative	NA	NA	NA	NA	NA	NA	NA	NA	NA	NA	NA	NA	NA	NA	NA	NA	NA	NA	NA	NA
R002	50150697	R002_4	male	54	Severe	2020-01-23	2020-02-08	2020-01-21	2020-01-24	2	4	NA	NA	NA	NA	NA	Yes	NA	Yes	Yes	NA	NA	NA	NA	NA	NA	NA	NA	NA	NA	69	102	26.6	4.19	217	5.5	1.03	3+	negative	+-	1+	negative	negative	negative	1+	negative	0	3	15
R002	50150697	R002_41	male	54	Severe	2020-01-23	2020-02-08	2020-01-21	2020-03-01	39	41	NA	NA	NA	NA	NA	NA	NA	NA	NA	NA	NA	NA	NA	NA	NA	NA	positive	positive	NA	NA	NA	NA	NA	NA	NA	NA	NA	NA	NA	NA	NA	NA	NA	NA	NA	NA	NA	NA
R002	50150697	R002_44	male	54	Severe	2020-01-23	2020-02-08	2020-01-21	2020-03-04	42	44	NA	NA	NA	NA	NA	NA	NA	NA	NA	NA	NA	NA	NA	NA	NA	NA	NA	NA	NA	78	97	37.9	2.69	369	NA	NA	NA	NA	NA	NA	NA	NA	NA	NA	NA	NA	NA	NA
R002	50150697	R002_45	male	54	Severe	2020-01-23	2020-02-08	2020-01-21	2020-03-05	43	45	NA	NA	NA	NA	NA	NA	NA	NA	NA	NA	NA	NA	NA	NA	NA	NA	positive	negative	NA	NA	NA	NA	NA	NA	NA	NA	NA	NA	NA	NA	NA	NA	NA	NA	NA	NA	NA	NA
R002	50150697	R002_46	male	54	Severe	2020-01-23	2020-02-08	2020-01-21	2020-03-06	44	46	NA	NA	NA	NA	NA	NA	NA	NA	NA	NA	NA	NA	NA	NA	NA	NA	positive	positive	NA	NA	NA	NA	NA	NA	NA	NA	NA	NA	NA	NA	NA	NA	NA	NA	NA	NA	NA	NA
R002	50150697	R002_47	male	54	Severe	2020-01-23	2020-02-08	2020-01-21	2020-03-07	45	47	NA	NA	NA	NA	NA	NA	NA	NA	NA	NA	NA	NA	NA	NA	NA	negative	NA	NA	NA	NA	NA	NA	NA	NA	NA	NA	NA	NA	NA	NA	NA	NA	NA	NA	NA	NA	NA	NA
R002	50150697	R002_48	male	54	Severe	2020-01-23	2020-02-08	2020-01-21	2020-03-08	46	48	NA	NA	NA	NA	NA	NA	NA	NA	NA	NA	NA	NA	NA	NA	NA	negative	NA	NA	NA	NA	NA	NA	NA	NA	NA	NA	NA	NA	NA	NA	NA	NA	NA	NA	NA	NA	NA	NA
R002	50150697	R002_6	male	54	Severe	2020-01-23	2020-02-08	2020-01-21	2020-01-26	4	6	4	Yes	Yes	Yes	10	NA	NA	NA	NA	NA	NA	NA	NA	NA	NA	NA	NA	NA	negative	NA	NA	NA	NA	NA	NA	NA	NA	NA	NA	NA	NA	NA	NA	NA	NA	NA	NA	NA
R002	50150697	R002_61	male	54	Severe	2020-01-23	2020-02-08	2020-01-21	2020-03-21	59	61	NA	NA	NA	NA	NA	NA	NA	NA	NA	NA	NA	NA	NA	NA	NA	NA	negative	negative	NA	70	102	NA	3.94	337	5.5	1.02	negative	negative	negative	+-	negative	negative	negative	1+	negative	0	1	3
R002	50150697	R002_7	male	54	Severe	2020-01-23	2020-02-08	2020-01-21	2020-01-27	5	7	NA	NA	NA	NA	NA	NA	NA	NA	NA	NA	NA	NA	NA	NA	NA	NA	NA	NA	NA	NA	NA	NA	NA	NA	NA	NA	NA	NA	NA	NA	NA	NA	NA	NA	NA	NA	NA	NA
R002	50150697	R002_78	male	54	Severe	2020-01-23	2020-02-08	2020-01-21	2020-04-07	76	78	NA	NA	NA	NA	NA	NA	NA	NA	NA	NA	NA	NA	NA	NA	NA	NA	negative	negative	NA	NA	NA	NA	NA	NA	NA	NA	NA	NA	NA	NA	NA	NA	NA	NA	NA	NA	NA	NA
R002	50150697	R002_8	male	54	Severe	2020-01-23	2020-02-08	2020-01-21	2020-01-28	6	8	NA	NA	NA	NA	NA	NA	NA	NA	NA	NA	NA	NA	NA	NA	NA	NA	NA	NA	NA	66	104	24.9	3.48	226	NA	NA	NA	NA	NA	NA	NA	NA	NA	NA	NA	NA	NA	NA
R002	50150697	R002_9	male	54	Severe	2020-01-23	2020-02-08	2020-01-21	2020-01-29	7	9	NA	NA	NA	NA	NA	NA	NA	NA	NA	NA	NA	NA	NA	NA	NA	NA	NA	NA	NA	NA	NA	NA	NA	NA	NA	NA	NA	NA	NA	NA	NA	NA	NA	NA	NA	NA	NA	NA
R003	50150708	R003_100	male	41	Severe	2020-01-23	2020-02-02	2020-01-16	2020-04-24	93	100	NA	NA	NA	NA	NA	NA	NA	NA	NA	NA	NA	NA	NA	NA	NA	NA	NA	negative	negative	NA	NA	NA	NA	NA	NA	NA	NA	NA	NA	NA	NA	NA	NA	NA	NA	NA	NA	NA
R003	50150708	R003_11	male	41	Severe	2020-01-23	2020-02-02	2020-01-16	2020-01-26	4	11	5	Yes	Yes	Yes	11	NA	NA	NA	NA	NA	NA	NA	NA	NA	NA	NA	positive	NA	NA	NA	NA	NA	NA	NA	NA	NA	NA	NA	NA	NA	NA	NA	NA	NA	NA	NA	NA	NA
R003	50150708	R003_110	male	41	Severe	2020-01-23	2020-02-02	2020-01-16	2020-05-04	103	110	NA	NA	NA	NA	NA	NA	NA	NA	NA	NA	NA	NA	NA	NA	NA	NA	NA	NA	NA	80	105	NA	4.82	520	NA	NA	NA	NA	NA	NA	NA	NA	NA	NA	NA	NA	NA	NA
R003	50150708	R003_12	male	41	Severe	2020-01-23	2020-02-02	2020-01-16	2020-01-27	5	12	NA	NA	NA	NA	NA	NA	NA	NA	NA	NA	NA	NA	NA	NA	NA	NA	NA	NA	NA	NA	NA	NA	NA	NA	NA	NA	NA	NA	NA	NA	NA	NA	NA	NA	NA	NA	NA	NA
R003	50150708	R003_13	male	41	Severe	2020-01-23	2020-02-02	2020-01-16	2020-01-28	6	13	NA	NA	NA	NA	NA	NA	NA	NA	NA	NA	NA	NA	NA	NA	NA	NA	NA	NA	NA	87	95	31.8	4.7	302	NA	NA	NA	NA	NA	NA	NA	NA	NA	NA	NA	NA	NA	NA
R003	50150708	R003_14	male	41	Severe	2020-01-23	2020-02-02	2020-01-16	2020-01-29	7	14	NA	NA	NA	NA	NA	NA	NA	NA	NA	NA	NA	NA	NA	NA	NA	NA	NA	NA	negative	NA	NA	NA	NA	NA	NA	NA	NA	NA	NA	NA	NA	NA	NA	NA	NA	NA	NA	NA
R003	50150708	R003_15	male	41	Severe	2020-01-23	2020-02-02	2020-01-16	2020-01-30	8	15	NA	NA	NA	NA	NA	NA	NA	NA	NA	NA	NA	NA	NA	NA	NA	NA	NA	NA	NA	NA	NA	NA	NA	NA	NA	NA	NA	NA	NA	NA	NA	NA	NA	NA	NA	NA	NA	NA
R003	50150708	R003_16	male	41	Severe	2020-01-23	2020-02-02	2020-01-16	2020-01-31	9	16	NA	NA	NA	NA	NA	NA	NA	NA	NA	NA	NA	NA	NA	NA	NA	NA	NA	NA	negative	NA	NA	NA	NA	NA	NA	NA	NA	NA	NA	NA	NA	NA	NA	NA	NA	NA	NA	NA
R003	50150708	R003_17	male	41	Severe	2020-01-23	2020-02-02	2020-01-16	2020/2/1	10	17	4	Yes	No	No	5	NA	NA	NA	NA	NA	NA	NA	NA	NA	NA	NA	negative	NA	NA	NA	NA	NA	NA	NA	NA	NA	NA	NA	NA	NA	NA	NA	NA	NA	NA	NA	NA	NA
R003	50150708	R003_18	male	41	Severe	2020-01-23	2020-02-02	2020-01-16	2020-02-02	11	18	NA	NA	NA	NA	NA	NA	NA	NA	NA	NA	NA	NA	NA	NA	NA	NA	NA	negative	NA	85	98	38.2	3.49	371	NA	NA	NA	NA	NA	NA	NA	NA	NA	NA	NA	NA	NA	NA
R003	50150708	R003_204	male	41	Severe	2020-01-23	2020-02-02	2020-01-16	2020-08-06	197	204	NA	NA	NA	NA	NA	NA	NA	NA	NA	NA	NA	NA	NA	NA	NA	NA	NA	NA	negative	78	106	NA	3.96	529	NA	NA	NA	NA	NA	NA	NA	NA	NA	NA	NA	NA	NA	NA
R003	50150708	R003_32	male	41	Severe	2020-01-23	2020-02-02	2020-01-16	2020-02-16	25	32	NA	NA	NA	NA	NA	NA	NA	NA	NA	NA	NA	NA	NA	NA	NA	NA	NA	negative	negative	81	103	57.9	5.56	418	NA	NA	NA	NA	NA	NA	NA	NA	NA	NA	NA	NA	NA	NA
R003	50150708	R003_47	male	41	Severe	2020-01-23	2020-02-02	2020-01-16	2020-03-02	40	47	NA	NA	NA	NA	NA	NA	NA	NA	NA	NA	NA	NA	NA	NA	NA	NA	NA	negative	negative	81	103	52.4	4.78	431	6	1.02	negative	negative	negative	negative	negative	negative	negative	negative	negative	NA	0	0
R003	50150708	R003_756	male	41	Severe	2020-01-23	2020-02-02	2020-01-16	2022-02-09	749	756	2	Yes	No	Yes	6	NA	NA	NA	NA	NA	NA	NA	NA	NA	NA	NA	NA	NA	NA	71	108	48.4	6.27	361	6	1.025	negative	negative	negative	negative	negative	negative	negative	negative	negative	0	0	2
R003	50150708	R003_8	male	41	Severe	2020-01-23	2020-02-02	2020-01-16	2020-01-23	1	8	3	Yes	Yes	No	6	NA	NA	NA	NA	NA	NA	NA	NA	NA	NA	NA	positive	NA	NA	NA	NA	NA	NA	NA	NA	NA	NA	NA	NA	NA	NA	NA	NA	NA	NA	NA	NA	NA
R003	50150708	R003_9	male	41	Severe	2020-01-23	2020-02-02	2020-01-16	2020-01-24	2	9	NA	NA	NA	NA	NA	NA	NA	NA	NA	NA	NA	NA	NA	NA	NA	NA	NA	NA	NA	75	108	32.6	5.75	322	5.5	1.025	negative	negative	+-	negative	negative	+-	negative	negative	negative	0	2	10
R004	50150713	R004_133	female	45	non-Severe	2020-01-23	2020-02-14	2020-01-21	2020-06-01	131	133	NA	NA	NA	NA	NA	NA	NA	NA	NA	NA	NA	NA	NA	NA	NA	NA	NA	NA	NA	59	106	NA	5.43	254	7	1.02	negative	negative	negative	negative	negative	negative	negative	negative	negative	0	2	11
R004	50150713	R004_14	female	45	non-Severe	2020-01-23	2020-02-14	2020-01-21	2020-02-03	12	14	NA	NA	NA	NA	NA	NA	NA	NA	NA	NA	NA	NA	NA	NA	NA	NA	NA	NA	NA	62	105	23.1	2.95	133	NA	NA	NA	NA	NA	NA	NA	NA	NA	NA	NA	NA	NA	NA
R004	50150713	R004_15	female	45	non-Severe	2020-01-23	2020-02-14	2020-01-21	2020-02-04	13	15	NA	NA	NA	NA	NA	NA	NA	NA	NA	NA	NA	NA	NA	NA	NA	NA	NA	NA	positive	NA	NA	NA	NA	NA	NA	NA	NA	NA	NA	NA	NA	NA	NA	NA	NA	NA	NA	NA
R004	50150713	R004_21	female	45	non-Severe	2020-01-23	2020-02-14	2020-01-21	2020-02-10	19	21	NA	NA	NA	NA	NA	NA	NA	NA	NA	NA	NA	NA	NA	NA	NA	NA	NA	NA	negative	NA	NA	NA	NA	NA	NA	NA	NA	NA	NA	NA	NA	NA	NA	NA	NA	NA	NA	NA
R004	50150713	R004_22	female	45	non-Severe	2020-01-23	2020-02-14	2020-01-21	2020-02-11	20	22	2	Yes	No	No	3	NA	NA	Yes	Yes	NA	NA	NA	NA	NA	NA	NA	NA	NA	negative	61	105	NA	2.31	133	NA	NA	NA	NA	NA	NA	NA	NA	NA	NA	NA	NA	NA	NA
R004	50150713	R004_24	female	45	non-Severe	2020-01-23	2020-02-14	2020-01-21	2020-02-13	22	24	NA	NA	NA	NA	NA	NA	Yes	Yes	Yes	NA	NA	NA	NA	NA	NA	NA	NA	negative	NA	NA	NA	NA	NA	NA	NA	NA	NA	NA	NA	NA	NA	NA	NA	NA	NA	NA	NA	NA
R004	50150713	R004_3	female	45	non-Severe	2020-01-23	2020-02-14	2020-01-21	2020-01-23	1	3	NA	NA	NA	NA	NA	NA	NA	NA	NA	NA	Yes	NA	NA	NA	NA	NA	positive	NA	NA	NA	NA	NA	NA	NA	5.5	1.03	2+	negative	1+	negative	negative	+-	negative	negative	negative	0	11	61
R004	50150713	R004_385	female	45	non-Severe	2020-01-23	2020-02-14	2020-01-21	2021/2/8	383	385	0	No	No	No	0	NA	NA	NA	NA	NA	NA	NA	NA	NA	NA	NA	NA	negative	negative	NA	NA	NA	NA	NA	NA	NA	NA	NA	NA	NA	NA	NA	NA	NA	NA	NA	NA	NA
R004	50150713	R004_386	female	45	non-Severe	2020-01-23	2020-02-14	2020-01-21	2021-02-09	384	386	NA	NA	NA	NA	NA	NA	Yes	NA	NA	NA	NA	NA	NA	NA	NA	NA	negative	NA	NA	48	113	46.6	4.43	223	6.5	1.004	NA	negative	NA	negative	negative	negative	negative	negative	negative	NA	NA	0
R004	50150713	R004_39	female	45	non-Severe	2020-01-23	2020-02-14	2020-01-21	2020-02-28	37	39	NA	NA	NA	NA	NA	NA	NA	NA	NA	NA	NA	NA	NA	NA	NA	NA	positive	negative	NA	63	103	NA	5.02	238	6.5	1.015	negative	negative	negative	negative	negative	negative	negative	negative	negative	NA	0	0
R004	50150713	R004_4	female	45	non-Severe	2020-01-23	2020-02-14	2020-01-21	2020-01-24	2	4	NA	NA	NA	NA	NA	NA	NA	Yes	Yes	NA	NA	NA	NA	NA	NA	NA	NA	NA	NA	61	105	28.3	4.19	208	NA	NA	NA	NA	NA	NA	NA	NA	NA	NA	NA	NA	NA	NA
R004	50150713	R004_42	female	45	non-Severe	2020-01-23	2020-02-14	2020-01-21	2020-03-02	40	42	NA	NA	NA	NA	NA	NA	NA	NA	NA	NA	NA	NA	NA	NA	NA	NA	positive	negative	negative	NA	NA	NA	NA	NA	NA	NA	NA	NA	NA	NA	NA	NA	NA	NA	NA	NA	NA	NA
R004	50150713	R004_44	female	45	non-Severe	2020-01-23	2020-02-14	2020-01-21	2020-03-04	42	44	NA	NA	NA	NA	NA	NA	NA	NA	NA	NA	NA	NA	NA	NA	NA	NA	negative	negative	NA	NA	NA	NA	NA	NA	NA	NA	NA	NA	NA	NA	NA	NA	NA	NA	NA	NA	NA	NA
R004	50150713	R004_46	female	45	non-Severe	2020-01-23	2020-02-14	2020-01-21	2020-03-06	44	46	NA	NA	NA	NA	NA	NA	NA	NA	NA	NA	NA	NA	NA	NA	NA	NA	negative	NA	NA	NA	NA	NA	NA	NA	NA	NA	NA	NA	NA	NA	NA	NA	NA	NA	NA	NA	NA	NA
R004	50150713	R004_5	female	45	non-Severe	2020-01-23	2020-02-14	2020-01-21	2020-01-25	3	5	NA	NA	NA	NA	NA	NA	NA	NA	NA	NA	NA	NA	NA	NA	NA	NA	NA	positive	NA	NA	NA	NA	NA	NA	NA	NA	NA	NA	NA	NA	NA	NA	NA	NA	NA	NA	NA	NA
R004	50150713	R004_61	female	45	non-Severe	2020-01-23	2020-02-14	2020-01-21	2020-03-21	59	61	NA	NA	NA	NA	NA	NA	NA	NA	NA	NA	NA	NA	NA	NA	NA	NA	NA	negative	negative	NA	NA	NA	NA	NA	NA	NA	NA	NA	NA	NA	NA	NA	NA	NA	NA	NA	NA	NA
R004	50150713	R004_7	female	45	non-Severe	2020-01-23	2020-02-14	2020-01-21	2020-01-27	5	7	2	Yes	No	No	3	NA	NA	NA	NA	NA	NA	NA	NA	NA	NA	NA	NA	NA	NA	NA	NA	NA	NA	NA	NA	NA	NA	NA	NA	NA	NA	NA	NA	NA	NA	NA	NA	NA
R004	50150713	R004_74	female	45	non-Severe	2020-01-23	2020-02-14	2020-01-21	2020-04-03	72	74	NA	NA	NA	NA	NA	NA	NA	NA	NA	NA	NA	NA	NA	NA	NA	NA	negative	negative	NA	63	103	46.7	4.29	214	6.5	1.02	negative	negative	negative	negative	negative	negative	negative	negative	negative	0	3	14
R004	50150713	R004_752	female	45	non-Severe	2020-01-23	2020-02-14	2020-01-21	2022-02-10	750	752	NA	NA	NA	NA	NA	NA	NA	NA	NA	NA	NA	NA	NA	NA	NA	NA	NA	NA	NA	56	106	40.2	4.87	212	6	1.009	negative	negative	negative	negative	negative	negative	negative	negative	negative	0	1	8
R004	50150713	R004_8	female	45	non-Severe	2020-01-23	2020-02-14	2020-01-21	2020-01-28	6	8	NA	NA	NA	NA	NA	Yes	Yes	Yes	NA	NA	NA	NA	NA	NA	NA	NA	NA	NA	NA	53	110	20.8	5.1	90	NA	NA	NA	NA	NA	NA	NA	NA	NA	NA	NA	NA	NA	NA
R004	50150713	R004_9	female	45	non-Severe	2020-01-23	2020-02-14	2020-01-21	2020-01-29	7	9	NA	NA	NA	NA	NA	NA	NA	NA	NA	NA	NA	NA	NA	NA	NA	NA	NA	NA	positive	55	109	19.9	2.88	90	NA	NA	NA	NA	NA	NA	NA	NA	NA	NA	NA	NA	NA	NA
R005	50150735	R005_10	female	35	Severe	2020-01-24	2020-02-19	2020-01-23	2020-02-01	9	10	NA	NA	NA	NA	NA	NA	NA	NA	NA	NA	NA	NA	NA	NA	NA	NA	NA	NA	NA	NA	NA	NA	NA	NA	NA	NA	NA	NA	NA	NA	NA	NA	NA	NA	NA	NA	NA	NA
R005	50150735	R005_11	female	35	Severe	2020-01-24	2020-02-19	2020-01-23	2020-02-02	10	11	NA	NA	NA	NA	NA	NA	NA	NA	NA	NA	NA	NA	NA	NA	NA	NA	NA	NA	NA	NA	NA	NA	NA	NA	NA	NA	NA	NA	NA	NA	NA	NA	NA	NA	NA	NA	NA	NA
R005	50150735	R005_12	female	35	Severe	2020-01-24	2020-02-19	2020-01-23	2020-02-03	11	12	NA	NA	NA	NA	NA	Yes	Yes	Yes	NA	NA	NA	NA	NA	NA	NA	NA	NA	NA	NA	64	108	21.8	5.15	165	NA	NA	NA	NA	NA	NA	NA	NA	NA	NA	NA	NA	NA	NA
R005	50150735	R005_13	female	35	Severe	2020-01-24	2020-02-19	2020-01-23	2020-02-04	12	13	NA	NA	NA	NA	NA	NA	NA	NA	NA	NA	NA	NA	NA	NA	NA	NA	NA	NA	NA	NA	NA	NA	NA	NA	NA	NA	NA	NA	NA	NA	NA	NA	NA	NA	NA	NA	NA	NA
R005	50150735	R005_14	female	35	Severe	2020-01-24	2020-02-19	2020-01-23	2020-02-05	13	14	NA	NA	NA	NA	NA	NA	NA	NA	NA	NA	NA	NA	NA	NA	NA	NA	NA	negative	NA	NA	NA	NA	NA	NA	NA	NA	NA	NA	NA	NA	NA	NA	NA	NA	NA	NA	NA	NA
R005	50150735	R005_15	female	35	Severe	2020-01-24	2020-02-19	2020-01-23	2020-02-06	14	15	NA	NA	NA	NA	NA	NA	NA	NA	NA	NA	NA	NA	NA	NA	NA	NA	NA	NA	NA	64	108	41.3	7.26	194	NA	NA	NA	NA	NA	NA	NA	NA	NA	NA	NA	NA	NA	NA
R005	50150735	R005_151	female	35	Severe	2020-01-24	2020-02-19	2020-01-23	2020-06-21	150	151	NA	NA	NA	NA	NA	NA	NA	NA	NA	NA	NA	NA	NA	NA	NA	NA	negative	NA	NA	63	110	NA	6.54	347	5.5	1.03	negative	negative	negative	negative	negative	negative	1+	negative	negative	0	38	208
R005	50150735	R005_17	female	35	Severe	2020-01-24	2020-02-19	2020-01-23	2020-02-08	16	17	NA	NA	NA	NA	NA	NA	NA	NA	NA	NA	NA	NA	NA	NA	NA	NA	NA	NA	negative	NA	NA	NA	NA	NA	NA	NA	NA	NA	NA	NA	NA	NA	NA	NA	NA	NA	NA	NA
R005	50150735	R005_18	female	35	Severe	2020-01-24	2020-02-19	2020-01-23	2020-02-09	17	18	NA	NA	NA	NA	NA	NA	NA	NA	NA	NA	NA	NA	NA	NA	NA	NA	NA	NA	NA	NA	NA	NA	NA	NA	NA	NA	NA	NA	NA	NA	NA	NA	NA	NA	NA	NA	NA	NA
R005	50150735	R005_19	female	35	Severe	2020-01-24	2020-02-19	2020-01-23	2020-02-10	18	19	NA	NA	NA	NA	NA	NA	NA	NA	NA	NA	NA	NA	NA	NA	NA	NA	NA	NA	NA	NA	NA	NA	NA	NA	NA	NA	NA	NA	NA	NA	NA	NA	NA	NA	NA	NA	NA	NA
R005	50150735	R005_2	female	35	Severe	2020-01-24	2020-02-19	2020-01-23	2020-01-24	1	2	1	Yes	No	No	2	NA	NA	NA	Yes	NA	Yes	NA	NA	NA	NA	NA	positive	NA	NA	72	94	44.8	3.78	332	NA	NA	NA	NA	NA	NA	NA	NA	NA	NA	NA	NA	NA	NA
R005	50150735	R005_20	female	35	Severe	2020-01-24	2020-02-19	2020-01-23	2020-02-11	19	20	NA	NA	NA	NA	NA	NA	NA	NA	NA	NA	NA	NA	NA	NA	NA	NA	NA	NA	NA	64	108	41.6	5.76	213	NA	NA	NA	NA	NA	NA	NA	NA	NA	NA	NA	NA	NA	NA
R005	50150735	R005_21	female	35	Severe	2020-01-24	2020-02-19	2020-01-23	2020-02-12	20	21	4	Yes	Yes	Yes	10	NA	NA	NA	NA	NA	NA	NA	NA	NA	NA	NA	negative	NA	negative	NA	NA	NA	NA	NA	NA	NA	NA	NA	NA	NA	NA	NA	NA	NA	NA	NA	NA	NA
R005	50150735	R005_23	female	35	Severe	2020-01-24	2020-02-19	2020-01-23	2020-02-14	22	23	NA	NA	NA	NA	NA	NA	NA	NA	NA	NA	NA	NA	NA	NA	NA	NA	negative	NA	negative	NA	NA	NA	NA	NA	NA	NA	NA	NA	NA	NA	NA	NA	NA	NA	NA	NA	NA	NA
R005	50150735	R005_25	female	35	Severe	2020-01-24	2020-02-19	2020-01-23	2020-02-16	24	25	NA	NA	NA	NA	NA	NA	Yes	Yes	Yes	NA	NA	NA	NA	NA	NA	NA	NA	negative	NA	66	104	39.2	3.9	336	NA	NA	NA	NA	NA	NA	NA	NA	NA	NA	NA	NA	NA	NA
R005	50150735	R005_26	female	35	Severe	2020-01-24	2020-02-19	2020-01-23	2020-02-17	25	26	NA	NA	NA	NA	NA	NA	NA	NA	NA	NA	NA	NA	NA	NA	Yes	NA	NA	NA	NA	NA	NA	NA	NA	NA	NA	NA	NA	NA	NA	NA	NA	NA	NA	NA	NA	NA	NA	NA
R005	50150735	R005_3	female	35	Severe	2020-01-24	2020-02-19	2020-01-23	2020-01-25	2	3	NA	NA	NA	NA	NA	NA	NA	Yes	NA	NA	NA	NA	NA	NA	NA	NA	NA	NA	NA	NA	NA	NA	NA	NA	5	1.03	2+	negative	negative	negative	negative	negative	negative	negative	negative	0	1	3
R005	50150735	R005_383	female	35	Severe	2020-01-24	2020-02-19	2020-01-23	2021-02-08	382	383	1	Yes	No	No	2	NA	Yes	NA	NA	NA	NA	NA	NA	NA	NA	NA	NA	NA	negative	47	122	61	6.45	360	5.5	1.029	NA	negative	NA	negative	negative	negative	negative	negative	negative	NA	NA	3
R005	50150735	R005_4	female	35	Severe	2020-01-24	2020-02-19	2020-01-23	2020-01-26	3	4	NA	NA	NA	NA	NA	NA	NA	NA	NA	NA	NA	NA	NA	NA	NA	NA	NA	NA	NA	NA	NA	NA	NA	NA	NA	NA	NA	NA	NA	NA	NA	NA	NA	NA	NA	NA	NA	NA
R005	50150735	R005_43	female	35	Severe	2020-01-24	2020-02-19	2020-01-23	2020-03-05	42	43	NA	NA	NA	NA	NA	NA	NA	NA	NA	NA	NA	NA	NA	NA	NA	NA	negative	negative	NA	65	106	NA	4.54	316	5	1.03	negative	negative	negative	negative	negative	negative	negative	negative	negative	NA	1	5
R005	50150735	R005_5	female	35	Severe	2020-01-24	2020-02-19	2020-01-23	2020-01-27	4	5	NA	NA	NA	NA	NA	NA	NA	NA	NA	NA	NA	NA	NA	NA	NA	NA	NA	NA	NA	NA	NA	NA	NA	NA	NA	NA	NA	NA	NA	NA	NA	NA	NA	NA	NA	NA	NA	NA
R005	50150735	R005_56	female	35	Severe	2020-01-24	2020-02-19	2020-01-23	2020-03-18	55	56	NA	NA	NA	NA	NA	NA	NA	NA	NA	NA	NA	NA	NA	NA	NA	NA	NA	negative	negative	68	100	NA	4.85	383	5	1.03	negative	negative	negative	negative	negative	negative	1+	negative	negative	0	7	41
R005	50150735	R005_6	female	35	Severe	2020-01-24	2020-02-19	2020-01-23	2020-01-28	5	6	NA	NA	NA	NA	NA	NA	NA	NA	NA	NA	NA	NA	NA	NA	NA	NA	NA	NA	NA	78	85	32.6	3.89	312	NA	NA	NA	NA	NA	NA	NA	NA	NA	NA	NA	NA	NA	NA
R005	50150735	R005_7	female	35	Severe	2020-01-24	2020-02-19	2020-01-23	2020-01-29	6	7	NA	NA	NA	NA	NA	NA	NA	NA	NA	NA	NA	NA	NA	NA	NA	NA	NA	NA	NA	NA	NA	NA	NA	NA	NA	NA	NA	NA	NA	NA	NA	NA	NA	NA	NA	NA	NA	NA
R005	50150735	R005_8	female	35	Severe	2020-01-24	2020-02-19	2020-01-23	2020-01-30	7	8	NA	NA	NA	NA	NA	NA	NA	NA	NA	NA	NA	NA	NA	NA	NA	NA	NA	NA	NA	NA	NA	NA	NA	NA	NA	NA	NA	NA	NA	NA	NA	NA	NA	NA	NA	NA	NA	NA
R006	50150738	R006_16	male	74	Severe	2020-01-24	2020-02-14	2020-01-09	2020-01-24	1	16	5	Yes	No	Yes	9	NA	NA	NA	NA	NA	Yes	NA	NA	NA	NA	NA	positive	NA	NA	NA	NA	NA	NA	NA	NA	NA	NA	NA	NA	NA	NA	NA	NA	NA	NA	NA	NA	NA
R006	50150738	R006_17	male	74	Severe	2020-01-24	2020-02-14	2020-01-09	2020-01-25	2	17	NA	NA	NA	NA	NA	NA	NA	NA	NA	NA	NA	NA	NA	NA	NA	NA	NA	negative	NA	NA	NA	NA	NA	NA	5.5	1.025	negative	negative	negative	negative	negative	negative	negative	1+	negative	0	2	13
R006	50150738	R006_18	male	74	Severe	2020-01-24	2020-02-14	2020-01-09	2020-01-26	3	18	NA	NA	NA	NA	NA	NA	NA	NA	NA	NA	NA	NA	NA	NA	NA	NA	NA	NA	NA	70	88.5	24.8	7.535	253	NA	NA	NA	NA	NA	NA	NA	NA	NA	NA	NA	NA	NA	NA
R006	50150738	R006_19	male	74	Severe	2020-01-24	2020-02-14	2020-01-09	2020-01-27	4	19	NA	NA	NA	NA	NA	NA	NA	NA	NA	NA	NA	NA	NA	NA	NA	NA	NA	NA	NA	NA	NA	NA	NA	NA	NA	NA	NA	NA	NA	NA	NA	NA	NA	NA	NA	NA	NA	NA
R006	50150738	R006_20	male	74	Severe	2020-01-24	2020-02-14	2020-01-09	2020-01-28	5	20	NA	NA	NA	NA	NA	NA	NA	NA	NA	NA	NA	NA	NA	NA	NA	NA	NA	NA	NA	NA	NA	NA	NA	NA	NA	NA	NA	NA	NA	NA	NA	NA	NA	NA	NA	NA	NA	NA
R006	50150738	R006_21	male	74	Severe	2020-01-24	2020-02-14	2020-01-09	2020-01-29	6	21	NA	NA	NA	NA	NA	NA	NA	NA	NA	NA	NA	NA	NA	NA	NA	NA	NA	NA	NA	60	94	29	5.53	183	NA	NA	NA	NA	NA	NA	NA	NA	NA	NA	NA	NA	NA	NA
R006	50150738	R006_22	male	74	Severe	2020-01-24	2020-02-14	2020-01-09	2020-01-30	7	22	NA	NA	NA	NA	NA	NA	NA	NA	NA	NA	NA	NA	NA	NA	NA	NA	NA	NA	positive	NA	NA	NA	NA	NA	NA	NA	NA	NA	NA	NA	NA	NA	NA	NA	NA	NA	NA	NA
R006	50150738	R006_23	male	74	Severe	2020-01-24	2020-02-14	2020-01-09	2020-01-31	8	23	5	Yes	Yes	Yes	11	NA	NA	NA	NA	NA	NA	NA	NA	NA	NA	NA	negative	NA	NA	NA	NA	NA	NA	NA	NA	NA	NA	NA	NA	NA	NA	NA	NA	NA	NA	NA	NA	NA
R006	50150738	R006_24	male	74	Severe	2020-01-24	2020-02-14	2020-01-09	2020-02-01	9	24	NA	NA	NA	NA	NA	NA	NA	NA	NA	NA	NA	NA	NA	NA	Yes	NA	NA	NA	NA	NA	NA	NA	NA	NA	NA	NA	NA	NA	NA	NA	NA	NA	NA	NA	NA	NA	NA	NA
R006	50150738	R006_25	male	74	Severe	2020-01-24	2020-02-14	2020-01-09	2020-02-02	10	25	NA	NA	NA	NA	NA	NA	NA	NA	NA	NA	NA	NA	NA	NA	NA	NA	NA	NA	NA	NA	NA	NA	NA	NA	NA	NA	NA	NA	NA	NA	NA	NA	NA	NA	NA	NA	NA	NA
R006	50150738	R006_26	male	74	Severe	2020-01-24	2020-02-14	2020-01-09	2020-02-03	11	26	NA	NA	NA	NA	NA	NA	NA	NA	NA	NA	NA	NA	NA	NA	NA	NA	NA	NA	NA	60	94	33.7	4.33	177	NA	NA	NA	NA	NA	NA	NA	NA	NA	NA	NA	NA	NA	NA
R006	50150738	R006_27	male	74	Severe	2020-01-24	2020-02-14	2020-01-09	2020-02-04	12	27	NA	NA	NA	NA	NA	NA	NA	NA	NA	NA	NA	NA	NA	NA	NA	NA	NA	NA	positive	NA	NA	NA	NA	NA	NA	NA	NA	NA	NA	NA	NA	NA	NA	NA	NA	NA	NA	NA
R006	50150738	R006_28	male	74	Severe	2020-01-24	2020-02-14	2020-01-09	2020-02-05	13	28	NA	NA	NA	NA	NA	NA	NA	NA	NA	NA	NA	NA	NA	NA	NA	NA	NA	negative	NA	NA	NA	NA	NA	NA	NA	NA	NA	NA	NA	NA	NA	NA	NA	NA	NA	NA	NA	NA
R006	50150738	R006_31	male	74	Severe	2020-01-24	2020-02-14	2020-01-09	2020-02-08	16	31	NA	NA	NA	NA	NA	NA	Yes	Yes	Yes	NA	NA	NA	NA	NA	NA	NA	NA	NA	negative	59	95	NA	3.55	153	NA	NA	NA	NA	NA	NA	NA	NA	NA	NA	NA	NA	NA	NA
R006	50150738	R006_32	male	74	Severe	2020-01-24	2020-02-14	2020-01-09	2020-02-09	17	32	NA	NA	NA	NA	NA	NA	NA	NA	NA	NA	NA	NA	NA	NA	NA	NA	NA	negative	NA	NA	NA	NA	NA	NA	NA	NA	NA	NA	NA	NA	NA	NA	NA	NA	NA	NA	NA	NA
R006	50150738	R006_33	male	74	Severe	2020-01-24	2020-02-14	2020-01-09	2020-02-10	18	33	5	Yes	No	Yes	9	NA	NA	Yes	Yes	NA	NA	NA	NA	NA	NA	NA	NA	NA	negative	56	97	38.9	3.82	149	NA	NA	NA	NA	NA	NA	NA	NA	NA	NA	NA	NA	NA	NA
R006	50150738	R006_35	male	74	Severe	2020-01-24	2020-02-14	2020-01-09	2020-02-12	20	35	NA	NA	NA	NA	NA	NA	NA	NA	NA	NA	NA	NA	NA	NA	NA	NA	NA	NA	NA	NA	NA	NA	NA	NA	NA	NA	NA	NA	NA	NA	NA	NA	NA	NA	NA	NA	NA	NA
R006	50150738	R006_36	male	74	Severe	2020-01-24	2020-02-14	2020-01-09	2020-02-13	21	36	NA	NA	NA	NA	NA	NA	Yes	Yes	Yes	NA	NA	NA	NA	NA	NA	NA	NA	NA	NA	57	96	33.9	3.69	172	NA	NA	NA	NA	NA	NA	NA	NA	NA	NA	NA	NA	NA	NA
R006	50150738	R006_397	male	74	Severe	2020-01-24	2020-02-14	2020-01-09	2021-02-08	382	397	1	No	No	Yes	4	NA	Yes	NA	NA	NA	NA	NA	NA	NA	NA	NA	negative	NA	NA	65	90	43.7	4.44	363	6.5	1.022	NA	negative	NA	negative	negative	negative	negative	negative	negative	NA	NA	0
R006	50150738	R006_51	male	74	Severe	2020-01-24	2020-02-14	2020-01-09	2020-02-28	36	51	NA	NA	NA	NA	NA	NA	NA	NA	NA	NA	NA	NA	NA	NA	NA	NA	negative	negative	NA	74	86	NA	3.25	295	6.5	1.015	negative	negative	negative	negative	negative	negative	negative	negative	negative	NA	0	0
R006	50150738	R006_65	male	74	Severe	2020-01-24	2020-02-14	2020-01-09	2020-03-13	50	65	NA	NA	NA	NA	NA	NA	NA	NA	NA	NA	NA	NA	NA	NA	NA	NA	negative	negative	NA	NA	NA	NA	NA	NA	NA	NA	NA	NA	NA	NA	NA	NA	NA	NA	NA	NA	NA	NA
R006	50150738	R006_763	male	74	Severe	2020-01-24	2020-02-14	2020-01-09	2022-02-09	748	763	2	No	No	Yes	5	NA	NA	NA	NA	NA	NA	NA	NA	NA	NA	NA	NA	NA	NA	61	92	44.5	5.31	304	7.5	1.005	negative	negative	negative	negative	negative	negative	negative	negative	negative	0	0	0
R007	50150744	R007_10	male	47	Severe	2020-01-24	2020-02-18	2020-01-19	2020-01-28	5	10	NA	NA	NA	NA	NA	NA	NA	NA	NA	NA	NA	NA	NA	NA	NA	NA	NA	NA	NA	434	13	90.6	20.33	665	NA	NA	NA	NA	NA	NA	NA	NA	NA	NA	NA	NA	NA	NA
R007	50150744	R007_11	male	47	Severe	2020-01-24	2020-02-18	2020-01-19	2020-01-29	6	11	NA	NA	NA	NA	NA	NA	NA	Yes	Yes	NA	NA	NA	NA	NA	NA	NA	NA	NA	NA	404	14	86.3	19.36	583	NA	NA	NA	NA	NA	NA	NA	NA	NA	NA	NA	NA	NA	NA
R007	50150744	R007_12	male	47	Severe	2020-01-24	2020-02-18	2020-01-19	2020-01-30	7	12	NA	NA	NA	NA	NA	NA	NA	NA	NA	NA	NA	NA	NA	NA	NA	NA	NA	NA	positive	NA	NA	NA	NA	NA	NA	NA	NA	NA	NA	NA	NA	NA	NA	NA	NA	NA	NA	NA
R007	50150744	R007_14	male	47	Severe	2020-01-24	2020-02-18	2020-01-19	2020-02-01	9	14	NA	NA	NA	NA	NA	NA	NA	NA	NA	NA	NA	NA	NA	NA	NA	NA	NA	NA	NA	NA	NA	NA	NA	NA	NA	NA	NA	NA	NA	NA	NA	NA	NA	NA	NA	NA	NA	NA
R007	50150744	R007_16	male	47	Severe	2020-01-24	2020-02-18	2020-01-19	2020-02-03	11	16	NA	NA	NA	NA	NA	NA	NA	NA	NA	NA	Yes	NA	NA	NA	NA	NA	NA	NA	NA	365	16	76.4	14.98	355	NA	NA	NA	NA	NA	NA	NA	NA	NA	NA	NA	NA	NA	NA
R007	50150744	R007_17	male	47	Severe	2020-01-24	2020-02-18	2020-01-19	2020-02-04	12	17	NA	NA	NA	NA	NA	NA	NA	NA	NA	NA	NA	NA	NA	NA	NA	NA	NA	NA	positive	NA	NA	NA	NA	NA	NA	NA	NA	NA	NA	NA	NA	NA	NA	NA	NA	NA	NA	NA
R007	50150744	R007_18	male	47	Severe	2020-01-24	2020-02-18	2020-01-19	2020-02-05	13	18	5	Yes	Yes	Yes	11	NA	NA	NA	NA	NA	NA	NA	NA	NA	NA	NA	NA	NA	NA	NA	NA	NA	NA	NA	NA	NA	NA	NA	NA	NA	NA	NA	NA	NA	NA	NA	NA	NA
R007	50150744	R007_19	male	47	Severe	2020-01-24	2020-02-18	2020-01-19	2020-02-06	14	19	NA	NA	NA	NA	NA	NA	NA	NA	Yes	NA	NA	NA	NA	NA	NA	NA	NA	NA	NA	405	14	65.2	12.04	384	NA	NA	NA	NA	NA	NA	NA	NA	NA	NA	NA	NA	NA	NA
R007	50150744	R007_20	male	47	Severe	2020-01-24	2020-02-18	2020-01-19	2020-02-07	15	20	NA	NA	NA	NA	NA	NA	NA	Yes	NA	NA	NA	NA	NA	NA	NA	NA	NA	NA	NA	NA	NA	NA	NA	NA	NA	NA	NA	NA	NA	NA	NA	NA	NA	NA	NA	NA	NA	NA
R007	50150744	R007_21	male	47	Severe	2020-01-24	2020-02-18	2020-01-19	2020-02-08	16	21	NA	NA	NA	NA	NA	NA	NA	NA	NA	NA	NA	NA	NA	NA	NA	NA	NA	NA	negative	NA	NA	NA	NA	NA	NA	NA	NA	NA	NA	NA	NA	NA	NA	NA	NA	NA	NA	NA
R007	50150744	R007_22	male	47	Severe	2020-01-24	2020-02-18	2020-01-19	2020-02-09	17	22	NA	NA	NA	NA	NA	NA	NA	NA	NA	NA	NA	NA	NA	NA	NA	NA	NA	negative	NA	NA	NA	NA	NA	NA	NA	NA	NA	NA	NA	NA	NA	NA	NA	NA	NA	NA	NA	NA
R007	50150744	R007_23	male	47	Severe	2020-01-24	2020-02-18	2020-01-19	2020-02-10	18	23	NA	NA	NA	NA	NA	NA	NA	Yes	Yes	NA	NA	NA	NA	NA	Yes	NA	NA	NA	negative	374	15	71.8	11.41	475	NA	NA	NA	NA	NA	NA	NA	NA	NA	NA	NA	NA	NA	NA
R007	50150744	R007_26	male	47	Severe	2020-01-24	2020-02-18	2020-01-19	2020/2/13	21	26	5	Yes	No	No	6	NA	NA	NA	NA	NA	NA	NA	NA	NA	NA	NA	NA	NA	NA	NA	NA	NA	NA	NA	NA	NA	NA	NA	NA	NA	NA	NA	NA	NA	NA	NA	NA	NA
R007	50150744	R007_27	male	47	Severe	2020-01-24	2020-02-18	2020-01-19	2020-02-14	22	27	NA	NA	NA	NA	NA	NA	NA	NA	NA	NA	NA	NA	NA	NA	NA	NA	negative	NA	NA	NA	NA	NA	NA	NA	NA	NA	NA	NA	NA	NA	NA	NA	NA	NA	NA	NA	NA	NA
R007	50150744	R007_28	male	47	Severe	2020-01-24	2020-02-18	2020-01-19	2020-02-15	23	28	NA	NA	NA	NA	NA	NA	NA	NA	NA	NA	NA	NA	NA	NA	NA	NA	NA	NA	NA	381	15	NA	11.26	666	NA	NA	NA	NA	NA	NA	NA	NA	NA	NA	NA	NA	NA	NA
R007	50150744	R007_29	male	47	Severe	2020-01-24	2020-02-18	2020-01-19	2020-02-16	24	29	NA	NA	NA	NA	NA	NA	NA	NA	NA	NA	NA	NA	NA	NA	NA	NA	NA	negative	NA	NA	NA	NA	NA	NA	NA	NA	NA	NA	NA	NA	NA	NA	NA	NA	NA	NA	NA	NA
R007	50150744	R007_387	male	47	Severe	2020-01-24	2020-02-18	2020-01-19	2021-02-08	382	387	1	Yes	No	No	2	NA	Yes	NA	NA	NA	NA	NA	NA	NA	NA	NA	NA	NA	negative	696	7	122.5	40.74	353	5.5	1.01	NA	+-	NA	negative	negative	negative	negative	negative	negative	NA	NA	0
R007	50150744	R007_45	male	47	Severe	2020-01-24	2020-02-18	2020-01-19	2020-03-03	40	45	NA	NA	NA	NA	NA	NA	NA	NA	NA	NA	NA	NA	NA	NA	NA	NA	positive	negative	NA	369	16	NA	12.82	511	NA	NA	NA	NA	NA	NA	NA	NA	NA	NA	NA	NA	NA	NA
R007	50150744	R007_47	male	47	Severe	2020-01-24	2020-02-18	2020-01-19	2020-03-05	42	47	NA	NA	NA	NA	NA	NA	NA	NA	NA	NA	NA	NA	NA	NA	NA	NA	negative	negative	NA	NA	NA	NA	NA	NA	NA	NA	NA	NA	NA	NA	NA	NA	NA	NA	NA	NA	NA	NA
R007	50150744	R007_48	male	47	Severe	2020-01-24	2020-02-18	2020-01-19	2020-03-06	43	48	NA	NA	NA	NA	NA	NA	NA	NA	NA	NA	NA	NA	NA	NA	NA	NA	negative	NA	NA	NA	NA	NA	NA	NA	NA	NA	NA	NA	NA	NA	NA	NA	NA	NA	NA	NA	NA	NA
R007	50150744	R007_6	male	47	Severe	2020-01-24	2020-02-18	2020-01-19	2020-01-24	1	6	NA	NA	NA	NA	NA	NA	NA	NA	NA	NA	NA	NA	NA	NA	NA	NA	positive	NA	NA	NA	NA	NA	NA	NA	NA	NA	NA	NA	NA	NA	NA	NA	NA	NA	NA	NA	NA	NA
R007	50150744	R007_65	male	47	Severe	2020-01-24	2020-02-18	2020-01-19	2020-03-23	60	65	NA	NA	NA	NA	NA	NA	NA	NA	NA	NA	NA	NA	NA	NA	NA	NA	negative	negative	NA	310	19	NA	14.46	390	6	1.02	negative	negative	2+	negative	negative	negative	negative	negative	negative	0	1	3
R007	50150744	R007_7	male	47	Severe	2020-01-24	2020-02-18	2020-01-19	2020-01-25	2	7	5	Yes	No	No	6	Yes	Yes	Yes	Yes	NA	NA	NA	NA	NA	NA	NA	NA	NA	NA	432	13	76.3	17.12	577	5	1.02	+-	negative	2+	negative	negative	negative	negative	negative	negative	0	1	5
R007	50150744	R007_78	male	47	Severe	2020-01-24	2020-02-18	2020-01-19	2020-04-05	73	78	NA	NA	NA	NA	NA	NA	NA	NA	NA	NA	NA	NA	NA	NA	NA	NA	negative	negative	NA	325	18	90.4	13.15	526	6	1.02	negative	+-	2+	negative	negative	negative	negative	negative	negative	0	0	1
R007	50150744	R007_79	male	47	Severe	2020-01-24	2020-02-18	2020-01-19	2020-04-06	74	79	NA	NA	NA	NA	NA	NA	NA	NA	NA	NA	NA	NA	NA	NA	NA	NA	negative	NA	NA	NA	NA	NA	NA	NA	NA	NA	NA	NA	NA	NA	NA	NA	NA	NA	NA	NA	NA	NA
R007	50150744	R007_8	male	47	Severe	2020-01-24	2020-02-18	2020-01-19	2020-01-26	3	8	NA	NA	NA	NA	NA	NA	NA	NA	NA	NA	NA	NA	NA	NA	NA	NA	NA	NA	NA	426	13	88.9	19.57	754	NA	NA	NA	NA	NA	NA	NA	NA	NA	NA	NA	NA	NA	NA
R007	50150744	R007_9	male	47	Severe	2020-01-24	2020-02-18	2020-01-19	2020-01-27	4	9	NA	NA	NA	NA	NA	NA	NA	NA	NA	NA	NA	NA	NA	NA	NA	NA	NA	NA	NA	NA	NA	NA	NA	NA	NA	NA	NA	NA	NA	NA	NA	NA	NA	NA	NA	NA	NA	NA
R008	50150745	R008_13	male	50	Severe	2020-01-24	2020-02-01	2020-01-12	2020-01-24	1	13	5	Yes	Yes	No	8	NA	NA	NA	NA	NA	NA	NA	NA	NA	NA	NA	negative	NA	NA	NA	NA	NA	NA	NA	NA	NA	NA	NA	NA	NA	NA	NA	NA	NA	NA	NA	NA	NA
R008	50150745	R008_14	male	50	Severe	2020-01-24	2020-02-01	2020-01-12	2020-01-25	2	14	NA	NA	NA	NA	NA	NA	NA	NA	NA	NA	NA	NA	NA	NA	NA	NA	NA	NA	NA	90	85	25.3	5.21	156	6.5	1.01	negative	negative	negative	negative	negative	negative	negative	negative	negative	0	0	2
R008	50150745	R008_145	male	50	Severe	2020-01-24	2020-02-01	2020-01-12	2020-06-04	133	145	NA	NA	NA	NA	NA	NA	NA	NA	NA	NA	NA	NA	NA	NA	NA	NA	NA	NA	NA	91	84	NA	5.4	462	5	1.03	negative	negative	negative	negative	negative	negative	negative	negative	negative	0	3	17
R008	50150745	R008_15	male	50	Severe	2020-01-24	2020-02-01	2020-01-12	2020-01-26	3	15	NA	NA	NA	NA	NA	NA	NA	NA	NA	NA	NA	NA	NA	NA	NA	NA	NA	NA	NA	90	85	29.1	7.09	137	NA	NA	NA	NA	NA	NA	NA	NA	NA	NA	NA	NA	NA	NA
R008	50150745	R008_16	male	50	Severe	2020-01-24	2020-02-01	2020-01-12	2020-01-27	4	16	5	Yes	Yes	Yes	11	NA	NA	NA	NA	NA	NA	NA	NA	NA	NA	NA	NA	NA	NA	NA	NA	NA	NA	NA	NA	NA	NA	NA	NA	NA	NA	NA	NA	NA	NA	NA	NA	NA
R008	50150745	R008_17	male	50	Severe	2020-01-24	2020-02-01	2020-01-12	2020-01-28	5	17	NA	NA	NA	NA	NA	NA	NA	NA	NA	NA	NA	NA	NA	NA	NA	NA	NA	NA	NA	88	88	34.4	5.82	125	NA	NA	NA	NA	NA	NA	NA	NA	NA	NA	NA	NA	NA	NA
R008	50150745	R008_18	male	50	Severe	2020-01-24	2020-02-01	2020-01-12	2020-01-29	6	18	NA	NA	NA	NA	NA	NA	NA	NA	NA	NA	NA	NA	NA	NA	NA	NA	NA	NA	NA	NA	NA	NA	NA	NA	NA	NA	NA	NA	NA	NA	NA	NA	NA	NA	NA	NA	NA	NA
R008	50150745	R008_19	male	50	Severe	2020-01-24	2020-02-01	2020-01-12	2020-01-30	7	19	NA	NA	NA	NA	NA	NA	NA	NA	NA	NA	NA	NA	NA	NA	NA	NA	NA	NA	negative	NA	NA	NA	NA	NA	NA	NA	NA	NA	NA	NA	NA	NA	NA	NA	NA	NA	NA	NA
R008	50150745	R008_20	male	50	Severe	2020-01-24	2020-02-01	2020-01-12	2020-01-31	8	20	5	Yes	Yes	No	8	NA	NA	NA	NA	NA	NA	NA	NA	NA	NA	NA	NA	negative	NA	NA	NA	NA	NA	NA	NA	NA	NA	NA	NA	NA	NA	NA	NA	NA	NA	NA	NA	NA
R008	50150745	R008_21	male	50	Severe	2020-01-24	2020-02-01	2020-01-12	2020-02-01	9	21	NA	NA	NA	NA	NA	NA	NA	NA	NA	NA	NA	NA	NA	NA	NA	NA	NA	NA	NA	84	93	46.5	5.21	285	NA	NA	NA	NA	NA	NA	NA	NA	NA	NA	NA	NA	NA	NA
R008	50150745	R008_34	male	50	Severe	2020-01-24	2020-02-01	2020-01-12	2020-02-14	22	34	NA	NA	NA	NA	NA	NA	NA	NA	NA	NA	NA	NA	NA	NA	NA	NA	NA	negative	negative	NA	NA	NA	NA	NA	NA	NA	NA	NA	NA	NA	NA	NA	NA	NA	NA	NA	NA	NA
R008	50150745	R008_395	male	50	Severe	2020-01-24	2020-02-01	2020-01-12	2021-02-09	383	395	4	Yes	No	No	5	NA	NA	NA	NA	NA	NA	NA	NA	NA	NA	NA	negative	NA	NA	79	99	47.9	5.21	371	5.5	1.023	NA	negative	NA	negative	negative	negative	negative	negative	negative	NA	NA	0
R008	50150745	R008_48	male	50	Severe	2020-01-24	2020-02-01	2020-01-12	2020-02-28	36	48	NA	NA	NA	NA	NA	NA	NA	NA	NA	NA	NA	NA	NA	NA	NA	NA	negative	negative	NA	82	96	NA	3.9	414	5	1.02	negative	negative	negative	negative	negative	negative	+-	negative	negative	0	9	47
R008	50150745	R008_760	male	50	Severe	2020-01-24	2020-02-01	2020-01-12	2022-02-09	748	760	4	Yes	No	Yes	8	NA	NA	NA	NA	NA	NA	NA	NA	NA	NA	NA	NA	NA	NA	87	87	48.6	5.95	398	6	1.026	negative	negative	negative	negative	negative	negative	negative	negative	negative	0	0	2
R009	50150746	R009_12	male	31	non-Severe	2020-01-24	2020-02-07	2020-01-23	2020-02-03	11	12	NA	NA	NA	NA	NA	NA	Yes	Yes	Yes	NA	NA	NA	NA	NA	NA	NA	NA	NA	negative	92	95	35	3.6	160	NA	NA	NA	NA	NA	NA	NA	NA	NA	NA	NA	NA	NA	NA
R009	50150746	R009_14	male	31	non-Severe	2020-01-24	2020-02-07	2020-01-23	2020-02-05	13	14	0	No	No	No	0	NA	NA	NA	NA	NA	NA	NA	NA	NA	NA	NA	NA	NA	negative	NA	NA	NA	NA	NA	NA	NA	NA	NA	NA	NA	NA	NA	NA	NA	NA	NA	NA	NA
R009	50150746	R009_15	male	31	non-Severe	2020-01-24	2020-02-07	2020-01-23	2020-02-06	14	15	NA	NA	NA	NA	NA	NA	Yes	Yes	Yes	NA	NA	NA	NA	NA	NA	NA	NA	positive	NA	82	109	33	3.22	178	NA	NA	NA	NA	NA	NA	NA	NA	NA	NA	NA	NA	NA	NA
R009	50150746	R009_16	male	31	non-Severe	2020-01-24	2020-02-07	2020-01-23	2020-02-07	15	16	NA	NA	NA	NA	NA	Yes	NA	Yes	NA	Yes	NA	Yes	Yes	NA	Yes	NA	NA	positive	NA	NA	NA	NA	NA	NA	NA	NA	NA	NA	NA	NA	NA	NA	NA	NA	NA	NA	NA	NA
R009	50150746	R009_2	male	31	non-Severe	2020-01-24	2020-02-07	2020-01-23	2020-01-24	1	2	0	No	No	No	0	NA	NA	NA	NA	NA	NA	NA	NA	NA	NA	NA	positive	NA	NA	NA	NA	NA	NA	NA	NA	NA	NA	NA	NA	NA	NA	NA	NA	NA	NA	NA	NA	NA
R009	50150746	R009_3	male	31	non-Severe	2020-01-24	2020-02-07	2020-01-23	2020-01-25	2	3	NA	NA	NA	NA	NA	NA	NA	NA	NA	NA	Yes	NA	NA	NA	NA	NA	NA	NA	NA	94	93	NA	3.19	184	6	1.02	negative	negative	negative	negative	negative	+-	negative	negative	negative	0	1	4
R009	50150746	R009_30	male	31	non-Severe	2020-01-24	2020-02-07	2020-01-23	2020-02-21	29	30	NA	NA	NA	NA	NA	NA	NA	Yes	NA	NA	NA	NA	NA	NA	NA	NA	NA	negative	positive	NA	NA	NA	NA	NA	NA	NA	NA	NA	NA	NA	NA	NA	NA	NA	NA	NA	NA	NA
R009	50150746	R009_36	male	31	non-Severe	2020-01-24	2020-02-07	2020-01-23	2020-02-27	35	36	NA	NA	NA	NA	NA	NA	NA	NA	NA	NA	NA	NA	NA	NA	NA	NA	negative	negative	NA	NA	NA	NA	NA	NA	NA	NA	NA	NA	NA	NA	NA	NA	NA	NA	NA	NA	NA	NA
R009	50150746	R009_38	male	31	non-Severe	2020-01-24	2020-02-07	2020-01-23	2020-02-29	37	38	NA	NA	NA	NA	NA	NA	NA	NA	NA	NA	NA	NA	NA	NA	NA	NA	negative	negative	NA	NA	NA	NA	NA	NA	NA	NA	NA	NA	NA	NA	NA	NA	NA	NA	NA	NA	NA	NA
R009	50150746	R009_384	male	31	non-Severe	2020-01-24	2020-02-07	2020-01-23	2021-02-09	383	384	0	No	No	No	0	NA	Yes	NA	NA	NA	NA	NA	Yes	NA	NA	NA	negative	NA	NA	78	114	43.8	3.36	191	6	1.026	NA	negative	NA	negative	negative	negative	negative	negative	negative	NA	NA	0
R009	50150746	R009_40	male	31	non-Severe	2020-01-24	2020-02-07	2020-01-23	2020-03-02	39	40	NA	NA	NA	NA	NA	NA	NA	NA	NA	NA	NA	NA	NA	NA	NA	NA	negative	NA	NA	NA	NA	NA	NA	NA	NA	NA	NA	NA	NA	NA	NA	NA	NA	NA	NA	NA	NA	NA
R009	50150746	R009_42	male	31	non-Severe	2020-01-24	2020-02-07	2020-01-23	2020-03-04	41	42	NA	NA	NA	NA	NA	NA	NA	Yes	NA	NA	NA	NA	NA	NA	NA	NA	NA	NA	NA	91	96	36.2	3.55	199	NA	NA	NA	NA	NA	NA	NA	NA	NA	NA	NA	NA	NA	NA
R009	50150746	R009_5	male	31	non-Severe	2020-01-24	2020-02-07	2020-01-23	2020-01-27	4	5	NA	NA	NA	NA	NA	NA	NA	NA	NA	NA	NA	NA	NA	NA	NA	NA	NA	NA	NA	NA	NA	NA	NA	NA	NA	NA	NA	NA	NA	NA	NA	NA	NA	NA	NA	NA	NA	NA
R009	50150746	R009_57	male	31	non-Severe	2020-01-24	2020-02-07	2020-01-23	2020-03-19	56	57	NA	NA	NA	NA	NA	NA	NA	Yes	NA	NA	NA	NA	NA	NA	NA	NA	negative	negative	NA	78	114	NA	4.24	163	6.5	1.02	negative	negative	negative	negative	negative	negative	negative	negative	negative	0	1	3
R009	50150746	R009_6	male	31	non-Severe	2020-01-24	2020-02-07	2020-01-23	2020-01-28	5	6	NA	NA	NA	NA	NA	NA	NA	NA	NA	NA	NA	NA	NA	NA	NA	NA	NA	NA	NA	101	85	35.5	3.01	149	NA	NA	NA	NA	NA	NA	NA	NA	NA	NA	NA	NA	NA	NA
R009	50150746	R009_7	male	31	non-Severe	2020-01-24	2020-02-07	2020-01-23	2020-01-29	6	7	NA	NA	NA	NA	NA	NA	NA	NA	NA	NA	NA	NA	NA	NA	NA	NA	NA	NA	negative	NA	NA	NA	NA	NA	NA	NA	NA	NA	NA	NA	NA	NA	NA	NA	NA	NA	NA	NA
R009	50150746	R009_71	male	31	non-Severe	2020-01-24	2020-02-07	2020-01-23	2020-04-02	70	71	NA	NA	NA	NA	NA	NA	NA	Yes	NA	NA	NA	NA	NA	NA	NA	NA	negative	negative	NA	NA	NA	NA	NA	NA	NA	NA	NA	NA	NA	NA	NA	NA	NA	NA	NA	NA	NA	NA
R009	50150746	R009_750	male	31	non-Severe	2020-01-24	2020-02-07	2020-01-23	2022-02-10	749	750	NA	NA	NA	NA	NA	NA	NA	NA	NA	NA	NA	NA	NA	NA	NA	NA	NA	NA	NA	89	97	38.5	4.23	210	5.5	1.029	negative	negative	negative	negative	negative	negative	negative	negative	negative	0	1	4
R010	50150762	R010_10	female	34	non-Severe	2020-01-25	2020-02-23	2020-01-24	2020-02-02	9	10	NA	NA	NA	NA	NA	NA	NA	NA	NA	NA	NA	NA	NA	NA	NA	NA	NA	NA	positive	NA	NA	NA	NA	NA	NA	NA	NA	NA	NA	NA	NA	NA	NA	NA	NA	NA	NA	NA
R010	50150762	R010_11	female	34	non-Severe	2020-01-25	2020-02-23	2020-01-24	2020-02-03	10	11	NA	NA	NA	NA	NA	NA	NA	NA	NA	NA	NA	NA	NA	NA	NA	NA	NA	NA	NA	61	114	19	2.92	276	NA	NA	NA	NA	NA	NA	NA	NA	NA	NA	NA	NA	NA	NA
R010	50150762	R010_125	female	34	non-Severe	2020-01-25	2020-02-23	2020-01-24	2020-05-27	124	125	NA	NA	NA	NA	NA	NA	NA	NA	NA	NA	NA	NA	NA	NA	NA	NA	negative	NA	NA	56	117	NA	3.22	306	6	1.015	negative	negative	negative	negative	negative	negative	negative	negative	negative	0	1	3
R010	50150762	R010_14	female	34	non-Severe	2020-01-25	2020-02-23	2020-01-24	2020-02-06	13	14	NA	NA	NA	NA	NA	NA	NA	NA	NA	NA	NA	NA	NA	NA	NA	NA	NA	NA	negative	NA	NA	NA	NA	NA	NA	NA	NA	NA	NA	NA	NA	NA	NA	NA	NA	NA	NA	NA
R010	50150762	R010_16	female	34	non-Severe	2020-01-25	2020-02-23	2020-01-24	2020-02-08	15	16	NA	NA	NA	NA	NA	NA	NA	NA	NA	NA	NA	NA	NA	NA	NA	NA	NA	NA	negative	NA	NA	NA	NA	NA	NA	NA	NA	NA	NA	NA	NA	NA	NA	NA	NA	NA	NA	NA
R010	50150762	R010_17	female	34	non-Severe	2020-01-25	2020-02-23	2020-01-24	2020-02-09	16	17	5	Yes	Yes	Yes	11	NA	NA	NA	NA	NA	NA	NA	NA	NA	NA	NA	NA	negative	NA	NA	NA	NA	NA	NA	NA	NA	NA	NA	NA	NA	NA	NA	NA	NA	NA	NA	NA	NA
R010	50150762	R010_18	female	34	non-Severe	2020-01-25	2020-02-23	2020-01-24	2020-02-10	17	18	NA	NA	NA	NA	NA	NA	NA	Yes	Yes	NA	NA	NA	NA	NA	NA	NA	NA	NA	NA	54	119	36.6	2.68	267	NA	NA	NA	NA	NA	NA	NA	NA	NA	NA	NA	NA	NA	NA
R010	50150762	R010_2	female	34	non-Severe	2020-01-25	2020-02-23	2020-01-24	2020-01-25	1	2	0	No	No	No	0	NA	NA	NA	NA	NA	Yes	NA	NA	NA	NA	NA	positive	NA	NA	NA	NA	NA	NA	NA	NA	NA	NA	NA	NA	NA	NA	NA	NA	NA	NA	NA	NA	NA
R010	50150762	R010_22	female	34	non-Severe	2020-01-25	2020-02-23	2020-01-24	2020-02-14	21	22	NA	NA	NA	NA	NA	NA	NA	NA	NA	NA	NA	NA	NA	NA	NA	NA	positive	NA	NA	NA	NA	NA	NA	NA	NA	NA	NA	NA	NA	NA	NA	NA	NA	NA	NA	NA	NA	NA
R010	50150762	R010_23	female	34	non-Severe	2020-01-25	2020-02-23	2020-01-24	2020-02-15	22	23	NA	NA	NA	NA	NA	NA	NA	NA	Yes	NA	NA	NA	NA	NA	NA	NA	NA	NA	NA	58	116	NA	2.44	283	NA	NA	NA	NA	NA	NA	NA	NA	NA	NA	NA	NA	NA	NA
R010	50150762	R010_24	female	34	non-Severe	2020-01-25	2020-02-23	2020-01-24	2020-02-16	23	24	NA	NA	NA	NA	NA	NA	NA	Yes	NA	NA	NA	NA	NA	NA	NA	NA	NA	negative	NA	NA	NA	NA	NA	NA	NA	NA	NA	NA	NA	NA	NA	NA	NA	NA	NA	NA	NA	NA
R010	50150762	R010_25	female	34	non-Severe	2020-01-25	2020-02-23	2020-01-24	2020-02-17	24	25	NA	NA	NA	NA	NA	NA	NA	NA	NA	NA	NA	NA	NA	NA	NA	NA	negative	NA	NA	NA	NA	NA	NA	NA	NA	NA	NA	NA	NA	NA	NA	NA	NA	NA	NA	NA	NA	NA
R010	50150762	R010_26	female	34	non-Severe	2020-01-25	2020-02-23	2020-01-24	2020-02-18	25	26	NA	NA	NA	NA	NA	NA	NA	NA	NA	NA	NA	NA	NA	NA	NA	negative	negative	NA	NA	NA	NA	NA	NA	NA	NA	NA	NA	NA	NA	NA	NA	NA	NA	NA	NA	NA	NA	NA
R010	50150762	R010_27	female	34	non-Severe	2020-01-25	2020-02-23	2020-01-24	2020-02-19	26	27	NA	NA	NA	NA	NA	NA	Yes	NA	Yes	NA	NA	NA	NA	NA	NA	negative	NA	NA	NA	53	119	37.9	2.59	357	NA	NA	NA	NA	NA	NA	NA	NA	NA	NA	NA	NA	NA	NA
R010	50150762	R010_28	female	34	non-Severe	2020-01-25	2020-02-23	2020-01-24	2020-02-20	27	28	NA	NA	NA	NA	NA	NA	NA	Yes	NA	NA	NA	NA	NA	NA	NA	NA	NA	NA	NA	NA	NA	NA	NA	NA	NA	NA	NA	NA	NA	NA	NA	NA	NA	NA	NA	NA	NA	NA
R010	50150762	R010_29	female	34	non-Severe	2020-01-25	2020-02-23	2020-01-24	2020-02-21	28	29	4	Yes	No	No	5	NA	NA	NA	NA	NA	NA	NA	NA	NA	NA	NA	negative	NA	NA	NA	NA	NA	NA	NA	NA	NA	NA	NA	NA	NA	NA	NA	NA	NA	NA	NA	NA	NA
R010	50150762	R010_3	female	34	non-Severe	2020-01-25	2020-02-23	2020-01-24	2020-01-26	2	3	NA	NA	NA	NA	NA	NA	NA	Yes	Yes	NA	NA	NA	NA	NA	NA	NA	NA	NA	NA	66	105	31.8	2.49	370	5.5	1.025	negative	negative	negative	negative	negative	2+	negative	negative	negative	0	3	17
R010	50150762	R010_31	female	34	non-Severe	2020-01-25	2020-02-23	2020-01-24	2020-02-23	30	31	NA	NA	NA	NA	NA	NA	NA	NA	NA	NA	NA	NA	NA	NA	NA	NA	NA	NA	NA	NA	NA	NA	NA	NA	NA	NA	NA	NA	NA	NA	NA	NA	NA	NA	NA	NA	NA	NA
R010	50150762	R010_382	female	34	non-Severe	2020-01-25	2020-02-23	2020-01-24	2021/2/8	381	382	0	No	No	No	0	NA	NA	NA	NA	NA	NA	NA	NA	NA	NA	NA	negative	NA	NA	NA	NA	NA	NA	NA	NA	NA	NA	NA	NA	NA	NA	NA	NA	NA	NA	NA	NA	NA
R010	50150762	R010_383	female	34	non-Severe	2020-01-25	2020-02-23	2020-01-24	2021-02-09	382	383	NA	NA	NA	NA	NA	NA	Yes	NA	NA	NA	NA	NA	Yes	NA	NA	NA	negative	NA	NA	41	129	41.8	3.72	314	6	1.027	NA	negative	NA	negative	negative	negative	3+	negative	negative	NA	NA	2
R010	50150762	R010_46	female	34	non-Severe	2020-01-25	2020-02-23	2020-01-24	2020-03-09	45	46	NA	NA	NA	NA	NA	NA	NA	NA	NA	NA	NA	NA	NA	NA	NA	NA	negative	negative	NA	57	117	NA	2.85	322	6	1.02	3+	negative	negative	negative	negative	negative	1+	negative	negative	0	3	18
R010	50150762	R010_6	female	34	non-Severe	2020-01-25	2020-02-23	2020-01-24	2020/1/29	5	6	NA	NA	NA	NA	NA	Yes	Yes	Yes	NA	NA	NA	NA	NA	NA	NA	NA	NA	NA	NA	NA	NA	NA	NA	NA	NA	NA	NA	NA	NA	NA	NA	NA	NA	NA	NA	NA	NA	NA
R010	50150762	R010_60	female	34	non-Severe	2020-01-25	2020-02-23	2020-01-24	2020-03-23	59	60	NA	NA	NA	NA	NA	NA	NA	NA	NA	NA	NA	NA	NA	NA	NA	NA	negative	negative	NA	63	111	NA	2.58	335	6.5	1.02	negative	negative	negative	negative	negative	negative	2+	negative	negative	0	35	191
R010	50150762	R010_7	female	34	non-Severe	2020-01-25	2020-02-23	2020-01-24	2020-01-30	6	7	NA	NA	NA	NA	NA	NA	NA	NA	NA	NA	NA	NA	NA	NA	NA	NA	NA	NA	NA	72	94	28.6	3.28	332	NA	NA	NA	NA	NA	NA	NA	NA	NA	NA	NA	NA	NA	NA
R010	50150762	R010_748	female	34	non-Severe	2020-01-25	2020-02-23	2020-01-24	2022-02-09	747	748	NA	NA	NA	NA	NA	NA	NA	NA	NA	NA	NA	NA	NA	NA	NA	NA	NA	NA	NA	44	124	44	4.68	310	5.5	1.026	negative	negative	negative	negative	negative	negative	negative	negative	negative	0	1	8
R010	50150762	R010_9	female	34	non-Severe	2020-01-25	2020-02-23	2020-01-24	2020/2/1	8	9	NA	NA	NA	NA	NA	NA	NA	NA	NA	Yes	NA	Yes	Yes	Yes	Yes	NA	NA	NA	NA	NA	NA	NA	NA	NA	NA	NA	NA	NA	NA	NA	NA	NA	NA	NA	NA	NA	NA	NA
R011	50150763	R011_1	male	46	non-Severe	2020-01-25	2020-02-19	2020-01-25	2020-01-25	1	1	1	Yes	No	No	2	Yes	Yes	Yes	NA	NA	Yes	NA	NA	NA	NA	NA	positive	NA	NA	NA	NA	NA	NA	NA	NA	NA	NA	NA	NA	NA	NA	NA	NA	NA	NA	NA	NA	NA
R011	50150763	R011_12	male	46	non-Severe	2020-01-25	2020-02-19	2020-01-25	2020-02-05	12	12	NA	NA	NA	NA	NA	NA	NA	NA	NA	NA	NA	NA	NA	NA	NA	NA	NA	NA	positive	NA	NA	NA	NA	NA	NA	NA	NA	NA	NA	NA	NA	NA	NA	NA	NA	NA	NA	NA
R011	50150763	R011_129	male	46	non-Severe	2020-01-25	2020-02-19	2020-01-25	2020-06-01	129	129	NA	NA	NA	NA	NA	NA	NA	NA	NA	NA	NA	NA	NA	NA	NA	NA	NA	NA	NA	75	105	NA	6.57	494	5	1.025	negative	+-	1+	+-	negative	negative	negative	negative	negative	0	3	15
R011	50150763	R011_17	male	46	non-Severe	2020-01-25	2020-02-19	2020-01-25	2020-02-10	17	17	NA	NA	NA	NA	NA	NA	NA	NA	NA	NA	NA	NA	NA	NA	NA	NA	NA	NA	positive	NA	NA	NA	NA	NA	NA	NA	NA	NA	NA	NA	NA	NA	NA	NA	NA	NA	NA	NA
R011	50150763	R011_19	male	46	non-Severe	2020-01-25	2020-02-19	2020-01-25	2020-02-12	19	19	NA	NA	NA	NA	NA	NA	NA	NA	Yes	NA	NA	NA	NA	NA	NA	NA	NA	NA	NA	77	103	NA	4.43	421	NA	NA	NA	NA	NA	NA	NA	NA	NA	NA	NA	NA	NA	NA
R011	50150763	R011_2	male	46	non-Severe	2020-01-25	2020-02-19	2020-01-25	2020-01-26	2	2	NA	NA	NA	NA	NA	NA	NA	NA	NA	NA	NA	NA	NA	NA	NA	NA	NA	NA	NA	100	77	64.8	6.24	463	5	1.03	negative	negative	2+	3+	negative	negative	negative	negative	negative	0	2	11
R011	50150763	R011_20	male	46	non-Severe	2020-01-25	2020-02-19	2020-01-25	2020-02-13	20	20	NA	NA	NA	NA	NA	NA	NA	Yes	NA	NA	NA	NA	NA	NA	NA	NA	NA	NA	NA	NA	NA	NA	NA	NA	NA	NA	NA	NA	NA	NA	NA	NA	NA	NA	NA	NA	NA	NA
R011	50150763	R011_21	male	46	non-Severe	2020-01-25	2020-02-19	2020-01-25	2020-02-14	21	21	NA	NA	NA	NA	NA	NA	NA	NA	NA	NA	NA	NA	NA	NA	NA	NA	NA	NA	NA	NA	NA	NA	NA	NA	NA	NA	NA	NA	NA	NA	NA	NA	NA	NA	NA	NA	NA	NA
R011	50150763	R011_22	male	46	non-Severe	2020-01-25	2020-02-19	2020-01-25	2020/2/15	22	22	4	Yes	No	No	5	NA	NA	NA	NA	NA	NA	NA	NA	NA	NA	NA	negative	NA	NA	NA	NA	NA	NA	NA	NA	NA	NA	NA	NA	NA	NA	NA	NA	NA	NA	NA	NA	NA
R011	50150763	R011_23	male	46	non-Severe	2020-01-25	2020-02-19	2020-01-25	2020-02-16	23	23	NA	NA	NA	NA	NA	NA	NA	NA	NA	NA	NA	NA	NA	NA	NA	NA	NA	NA	negative	NA	NA	NA	NA	NA	NA	NA	NA	NA	NA	NA	NA	NA	NA	NA	NA	NA	NA	NA
R011	50150763	R011_24	male	46	non-Severe	2020-01-25	2020-02-19	2020-01-25	2020-02-17	24	24	NA	NA	NA	NA	NA	NA	NA	Yes	Yes	NA	NA	NA	NA	NA	NA	NA	NA	negative	negative	82	98	19.4	5.19	439	NA	NA	NA	NA	NA	NA	NA	NA	NA	NA	NA	NA	NA	NA
R011	50150763	R011_25	male	46	non-Severe	2020-01-25	2020-02-19	2020-01-25	2020-02-18	25	25	NA	NA	NA	NA	NA	NA	NA	NA	NA	NA	NA	NA	NA	NA	NA	NA	NA	negative	NA	NA	NA	NA	NA	NA	NA	NA	NA	NA	NA	NA	NA	NA	NA	NA	NA	NA	NA	NA
R011	50150763	R011_26	male	46	non-Severe	2020-01-25	2020-02-19	2020-01-25	2020-02-19	26	26	NA	NA	NA	NA	NA	NA	Yes	Yes	Yes	NA	NA	NA	NA	NA	NA	NA	NA	NA	NA	NA	NA	NA	NA	NA	NA	NA	NA	NA	NA	NA	NA	NA	NA	NA	NA	NA	NA	NA
R011	50150763	R011_3	male	46	non-Severe	2020-01-25	2020-02-19	2020-01-25	2020-01-27	3	3	NA	NA	NA	NA	NA	NA	NA	NA	NA	NA	NA	NA	NA	NA	NA	NA	NA	NA	NA	NA	NA	NA	NA	NA	NA	NA	NA	NA	NA	NA	NA	NA	NA	NA	NA	NA	NA	NA
R011	50150763	R011_36	male	46	non-Severe	2020-01-25	2020-02-19	2020-01-25	2020-02-29	36	36	NA	NA	NA	NA	NA	NA	NA	NA	NA	NA	NA	NA	NA	NA	NA	NA	negative	NA	NA	80	102	NA	5.19	490	5	1.03	negative	+-	1+	negative	negative	negative	negative	negative	negative	0	1	4
R011	50150763	R011_382	male	46	non-Severe	2020-01-25	2020-02-19	2020-01-25	2021-02-09	382	382	1	Yes	No	No	2	NA	Yes	NA	NA	NA	NA	NA	NA	NA	NA	NA	negative	NA	NA	79	102	44.9	8.1	654	5.5	1.037	NA	negative	NA	4+	negative	negative	negative	negative	negative	NA	NA	3
R011	50150763	R011_54	male	46	non-Severe	2020-01-25	2020-02-19	2020-01-25	2020-03-18	54	54	NA	NA	NA	NA	NA	NA	NA	NA	NA	NA	NA	NA	NA	NA	NA	NA	positive	negative	NA	NA	NA	NA	NA	NA	NA	NA	NA	NA	NA	NA	NA	NA	NA	NA	NA	NA	NA	NA
R011	50150763	R011_56	male	46	non-Severe	2020-01-25	2020-02-19	2020-01-25	2020-03-20	56	56	NA	NA	NA	NA	NA	NA	NA	NA	NA	NA	NA	NA	NA	NA	NA	NA	NA	NA	negative	NA	NA	NA	NA	NA	NA	NA	NA	NA	NA	NA	NA	NA	NA	NA	NA	NA	NA	NA
R011	50150763	R011_6	male	46	non-Severe	2020-01-25	2020-02-19	2020-01-25	2020-01-30	6	6	NA	NA	NA	NA	NA	NA	NA	NA	NA	NA	NA	NA	NA	NA	NA	NA	NA	NA	NA	92	86	34.8	5.56	409	NA	NA	NA	NA	NA	NA	NA	NA	NA	NA	NA	NA	NA	NA
R011	50150763	R011_63	male	46	non-Severe	2020-01-25	2020-02-19	2020-01-25	2020-03-27	63	63	NA	NA	NA	NA	NA	NA	NA	NA	NA	NA	NA	NA	NA	NA	NA	NA	negative	NA	NA	NA	NA	NA	NA	NA	NA	NA	NA	NA	NA	NA	NA	NA	NA	NA	NA	NA	NA	NA
R011	50150763	R011_68	male	46	non-Severe	2020-01-25	2020-02-19	2020-01-25	2020-04-01	68	68	NA	NA	NA	NA	NA	NA	NA	NA	NA	NA	NA	NA	NA	NA	NA	NA	NA	NA	NA	NA	NA	NA	NA	NA	NA	NA	NA	NA	NA	NA	NA	NA	NA	NA	NA	NA	NA	NA
R011	50150763	R011_70	male	46	non-Severe	2020-01-25	2020-02-19	2020-01-25	2020-04-03	70	70	NA	NA	NA	NA	NA	NA	NA	NA	NA	NA	NA	NA	NA	NA	NA	NA	negative	negative	NA	79	102	62.3	6.29	412	5	1.03	negative	negative	2+	negative	negative	negative	negative	negative	negative	0	1	4
R011	50150763	R011_748	male	46	non-Severe	2020-01-25	2020-02-19	2020-01-25	2022-02-10	748	748	0	No	No	No	0	NA	NA	NA	NA	NA	NA	NA	NA	NA	NA	NA	NA	NA	NA	86	91	55.8	8.06	437	5	1.036	negative	negative	1+	4+	negative	negative	negative	negative	negative	0	1	3
R011	50150763	R011_8	male	46	non-Severe	2020-01-25	2020-02-19	2020-01-25	2020-02-01	8	8	NA	NA	NA	NA	NA	NA	NA	NA	NA	NA	NA	NA	NA	NA	NA	NA	NA	NA	positive	NA	NA	NA	NA	NA	NA	NA	NA	NA	NA	NA	NA	NA	NA	NA	NA	NA	NA	NA
R011	50150763	R011_9	male	46	non-Severe	2020-01-25	2020-02-19	2020-01-25	2020-02-02	9	9	NA	NA	NA	NA	NA	NA	NA	NA	NA	NA	NA	NA	NA	NA	Yes	NA	NA	NA	NA	NA	NA	NA	NA	NA	NA	NA	NA	NA	NA	NA	NA	NA	NA	NA	NA	NA	NA	NA
R012	50150764	R012_10	male	33	non-Severe	2020-01-25	2020-02-11	2020-01-24	2020-02-02	9	10	5	Yes	No	Yes	9	NA	NA	NA	NA	NA	NA	NA	NA	NA	NA	NA	negative	negative	NA	NA	NA	NA	NA	NA	NA	NA	NA	NA	NA	NA	NA	NA	NA	NA	NA	NA	NA	NA
R012	50150764	R012_11	male	33	non-Severe	2020-01-25	2020-02-11	2020-01-24	2020-02-03	10	11	NA	NA	NA	NA	NA	NA	NA	NA	NA	NA	NA	NA	NA	NA	NA	NA	NA	NA	positive	99	86	47.9	3.11	427	NA	NA	NA	NA	NA	NA	NA	NA	NA	NA	NA	NA	NA	NA
R012	50150764	R012_15	male	33	non-Severe	2020-01-25	2020-02-11	2020-01-24	2020-02-07	14	15	NA	NA	NA	NA	NA	NA	NA	NA	NA	NA	NA	NA	NA	NA	NA	NA	NA	NA	negative	NA	NA	NA	NA	NA	NA	NA	NA	NA	NA	NA	NA	NA	NA	NA	NA	NA	NA	NA
R012	50150764	R012_16	male	33	non-Severe	2020-01-25	2020-02-11	2020-01-24	2020-02-08	15	16	NA	NA	NA	NA	NA	NA	NA	NA	NA	NA	NA	NA	NA	NA	NA	NA	NA	NA	NA	89	98	NA	2.49	376	NA	NA	NA	NA	NA	NA	NA	NA	NA	NA	NA	NA	NA	NA
R012	50150764	R012_17	male	33	non-Severe	2020-01-25	2020-02-11	2020-01-24	2020-02-09	16	17	NA	NA	NA	NA	NA	NA	NA	NA	NA	NA	NA	NA	NA	NA	NA	NA	NA	NA	negative	NA	NA	NA	NA	NA	NA	NA	NA	NA	NA	NA	NA	NA	NA	NA	NA	NA	NA	NA
R012	50150764	R012_18	male	33	non-Severe	2020-01-25	2020-02-11	2020-01-24	2020-02-10	17	18	3	Yes	No	No	4	NA	NA	NA	NA	NA	NA	NA	NA	NA	NA	NA	NA	NA	NA	89	98	40.9	3.18	447	NA	NA	NA	NA	NA	NA	NA	NA	NA	NA	NA	NA	NA	NA
R012	50150764	R012_2	male	33	non-Severe	2020-01-25	2020-02-11	2020-01-24	2020-01-25	1	2	5	Yes	No	No	6	Yes	NA	Yes	NA	NA	Yes	NA	NA	NA	NA	NA	positive	NA	NA	90	NA	NA	2.54	NA	5.5	1.015	negative	negative	negative	negative	negative	negative	negative	negative	negative	0	0	1
R012	50150764	R012_3	male	33	non-Severe	2020-01-25	2020-02-11	2020-01-24	2020-01-26	2	3	NA	NA	NA	NA	NA	NA	NA	NA	NA	NA	NA	NA	NA	NA	NA	NA	NA	NA	NA	110	76	42.6	3.27	492	NA	NA	NA	NA	NA	NA	NA	NA	NA	NA	NA	NA	NA	NA
R012	50150764	R012_33	male	33	non-Severe	2020-01-25	2020-02-11	2020-01-24	2020-02-25	32	33	NA	NA	NA	NA	NA	NA	NA	NA	NA	NA	NA	NA	NA	NA	NA	NA	negative	negative	NA	87	100	NA	3.58	571	5.5	1.02	1+	negative	negative	negative	negative	negative	negative	negative	negative	0	0	0
R012	50150764	R012_49	male	33	non-Severe	2020-01-25	2020-02-11	2020-01-24	2020-03-12	48	49	NA	NA	NA	NA	NA	NA	NA	NA	NA	NA	NA	NA	NA	NA	NA	NA	NA	NA	negative	NA	NA	NA	NA	NA	NA	NA	NA	NA	NA	NA	NA	NA	NA	NA	NA	NA	NA	NA
R012	50150764	R012_50	male	33	non-Severe	2020-01-25	2020-02-11	2020-01-24	2020-03-13	49	50	NA	NA	NA	NA	NA	NA	NA	NA	NA	NA	NA	NA	NA	NA	NA	NA	NA	negative	negative	NA	NA	NA	NA	NA	NA	NA	NA	NA	NA	NA	NA	NA	NA	NA	NA	NA	NA	NA
R012	50150764	R012_748	male	33	non-Severe	2020-01-25	2020-02-11	2020-01-24	2022-02-09	747	748	0	No	No	No	0	NA	NA	NA	NA	NA	NA	NA	NA	NA	NA	NA	NA	NA	NA	90	94	49	4.84	733	5	1.015	negative	negative	negative	negative	negative	negative	negative	negative	negative	0	1	3
R012	50150764	R012_9	male	33	non-Severe	2020-01-25	2020-02-11	2020-01-24	2020-02-01	8	9	NA	NA	NA	NA	NA	NA	NA	NA	NA	NA	NA	NA	NA	NA	NA	NA	NA	NA	negative	NA	NA	NA	NA	NA	NA	NA	NA	NA	NA	NA	NA	NA	NA	NA	NA	NA	NA	NA
R012	50150764	R012_98	male	33	non-Severe	2020-01-25	2020-02-11	2020-01-24	2020-04-30	97	98	NA	NA	NA	NA	NA	NA	NA	NA	NA	NA	NA	NA	NA	NA	NA	NA	NA	NA	NA	NA	NA	NA	NA	495	NA	NA	NA	NA	NA	NA	NA	NA	NA	NA	NA	NA	NA	NA
R013	50150765	R013_1	female	56	Severe	2020-01-25	2020-02-27	2020-01-22	2020-01-22	-2	1	NA	NA	NA	NA	NA	NA	NA	NA	NA	NA	NA	NA	NA	NA	NA	NA	NA	NA	NA	NA	NA	NA	NA	NA	NA	NA	NA	NA	NA	NA	NA	NA	NA	NA	NA	NA	NA	NA
R013	50150765	R013_10	female	56	Severe	2020-01-25	2020-02-27	2020-01-22	2020-01-31	7	10	NA	NA	NA	NA	NA	NA	Yes	Yes	Yes	NA	NA	NA	NA	NA	NA	NA	NA	NA	NA	76	76	32.4	3.55	461	NA	NA	NA	NA	NA	NA	NA	NA	NA	NA	NA	NA	NA	NA
R013	50150765	R013_12	female	56	Severe	2020-01-25	2020-02-27	2020-01-22	2020-02-02	9	12	NA	NA	NA	NA	NA	NA	NA	NA	NA	NA	NA	NA	NA	NA	NA	NA	NA	NA	NA	NA	NA	NA	NA	NA	NA	NA	NA	NA	NA	NA	NA	NA	NA	NA	NA	NA	NA	NA
R013	50150765	R013_13	female	56	Severe	2020-01-25	2020-02-27	2020-01-22	2020-02-03	10	13	NA	NA	NA	NA	NA	NA	NA	NA	NA	NA	NA	NA	NA	NA	NA	NA	NA	NA	NA	65	92	38.7	5.6	316	NA	NA	NA	NA	NA	NA	NA	NA	NA	NA	NA	NA	NA	NA
R013	50150765	R013_14	female	56	Severe	2020-01-25	2020-02-27	2020-01-22	2020-02-04	11	14	NA	NA	NA	NA	NA	NA	NA	NA	NA	NA	NA	NA	NA	NA	NA	NA	NA	NA	NA	NA	NA	NA	NA	NA	NA	NA	NA	NA	NA	NA	NA	NA	NA	NA	NA	NA	NA	NA
R013	50150765	R013_15	female	56	Severe	2020-01-25	2020-02-27	2020-01-22	2020-02-05	12	15	NA	NA	NA	NA	NA	NA	NA	NA	NA	NA	NA	NA	NA	NA	NA	NA	NA	NA	negative	NA	NA	NA	NA	NA	NA	NA	NA	NA	NA	NA	NA	NA	NA	NA	NA	NA	NA	NA
R013	50150765	R013_178	female	56	Severe	2020-01-25	2020-02-27	2020-01-22	2020-07-17	175	178	NA	NA	NA	NA	NA	NA	NA	NA	NA	NA	NA	NA	NA	NA	NA	NA	negative	NA	NA	NA	NA	NA	NA	NA	NA	NA	NA	NA	NA	NA	NA	NA	NA	NA	NA	NA	NA	NA
R013	50150765	R013_18	female	56	Severe	2020-01-25	2020-02-27	2020-01-22	2020-02-08	15	18	NA	NA	NA	NA	NA	NA	NA	Yes	Yes	NA	NA	NA	NA	NA	NA	NA	NA	NA	NA	58	99	NA	6.07	189	NA	NA	NA	NA	NA	NA	NA	NA	NA	NA	NA	NA	NA	NA
R013	50150765	R013_19	female	56	Severe	2020-01-25	2020-02-27	2020-01-22	2020-02-09	16	19	NA	NA	NA	NA	NA	NA	NA	NA	NA	NA	Yes	NA	NA	NA	NA	NA	NA	NA	negative	NA	NA	NA	NA	NA	NA	NA	NA	NA	NA	NA	NA	NA	NA	NA	NA	NA	NA	NA
R013	50150765	R013_20	female	56	Severe	2020-01-25	2020-02-27	2020-01-22	2020-02-10	17	20	5	Yes	No	No	6	NA	NA	Yes	Yes	NA	NA	NA	NA	NA	NA	NA	NA	negative	NA	NA	NA	NA	NA	NA	NA	NA	NA	NA	NA	NA	NA	NA	NA	NA	NA	NA	NA	NA
R013	50150765	R013_21	female	56	Severe	2020-01-25	2020-02-27	2020-01-22	2020-02-11	18	21	NA	NA	NA	NA	NA	NA	NA	Yes	Yes	NA	NA	NA	NA	NA	NA	NA	negative	NA	negative	56	100	55.8	4.74	207	NA	NA	NA	NA	NA	NA	NA	NA	NA	NA	NA	NA	NA	NA
R013	50150765	R013_22	female	56	Severe	2020-01-25	2020-02-27	2020-01-22	2020-02-12	19	22	NA	NA	NA	NA	NA	NA	NA	NA	NA	NA	NA	NA	NA	NA	NA	NA	positive	NA	negative	NA	NA	NA	NA	NA	NA	NA	NA	NA	NA	NA	NA	NA	NA	NA	NA	NA	NA	NA
R013	50150765	R013_26	female	56	Severe	2020-01-25	2020-02-27	2020-01-22	2020-02-16	23	26	NA	NA	NA	NA	NA	NA	NA	NA	NA	NA	NA	NA	NA	NA	NA	NA	positive	NA	negative	NA	NA	NA	NA	NA	NA	NA	NA	NA	NA	NA	NA	NA	NA	NA	NA	NA	NA	NA
R013	50150765	R013_27	female	56	Severe	2020-01-25	2020-02-27	2020-01-22	2020-02-17	24	27	NA	NA	NA	NA	NA	NA	NA	Yes	Yes	NA	NA	NA	NA	NA	NA	NA	NA	NA	NA	60	98	19.6	1.82	259	NA	NA	NA	NA	NA	NA	NA	NA	NA	NA	NA	NA	NA	NA
R013	50150765	R013_29	female	56	Severe	2020-01-25	2020-02-27	2020-01-22	2020-02-19	26	29	NA	NA	NA	NA	NA	NA	NA	NA	NA	NA	NA	NA	NA	NA	NA	NA	NA	negative	NA	NA	NA	NA	NA	NA	NA	NA	NA	NA	NA	NA	NA	NA	NA	NA	NA	NA	NA	NA
R013	50150765	R013_3	female	56	Severe	2020-01-25	2020-02-27	2020-01-22	2020-01-24	0	3	1	Yes	No	No	2	NA	NA	NA	NA	NA	NA	NA	NA	NA	NA	NA	NA	NA	NA	NA	NA	NA	NA	NA	NA	NA	NA	NA	NA	NA	NA	NA	NA	NA	NA	NA	NA	NA
R013	50150765	R013_31	female	56	Severe	2020-01-25	2020-02-27	2020-01-22	2020-02-21	28	31	5	Yes	No	Yes	9	NA	NA	NA	NA	NA	NA	NA	NA	NA	NA	negative	negative	NA	NA	NA	NA	NA	NA	NA	NA	NA	NA	NA	NA	NA	NA	NA	NA	NA	NA	NA	NA	NA
R013	50150765	R013_32	female	56	Severe	2020-01-25	2020-02-27	2020-01-22	2020-02-22	29	32	NA	NA	NA	NA	NA	NA	NA	Yes	Yes	NA	NA	NA	NA	NA	NA	NA	NA	NA	NA	65	92	37.9	3.23	257	NA	NA	NA	NA	NA	NA	NA	NA	NA	NA	NA	NA	NA	NA
R013	50150765	R013_33	female	56	Severe	2020-01-25	2020-02-27	2020-01-22	2020-02-23	30	33	NA	NA	NA	NA	NA	NA	NA	NA	NA	NA	NA	NA	NA	NA	NA	negative	negative	NA	negative	NA	NA	NA	NA	NA	NA	NA	NA	NA	NA	NA	NA	NA	NA	NA	NA	NA	NA	NA
R013	50150765	R013_34	female	56	Severe	2020-01-25	2020-02-27	2020-01-22	2020-02-24	31	34	NA	NA	NA	NA	NA	NA	NA	NA	NA	NA	NA	NA	NA	NA	NA	NA	NA	negative	NA	NA	NA	NA	NA	NA	NA	NA	NA	NA	NA	NA	NA	NA	NA	NA	NA	NA	NA	NA
R013	50150765	R013_35	female	56	Severe	2020-01-25	2020-02-27	2020-01-22	2020-02-25	32	35	NA	NA	NA	NA	NA	NA	NA	NA	NA	NA	NA	NA	NA	NA	NA	NA	negative	NA	NA	NA	NA	NA	NA	NA	NA	NA	NA	NA	NA	NA	NA	NA	NA	NA	NA	NA	NA	NA
R013	50150765	R013_36	female	56	Severe	2020-01-25	2020-02-27	2020-01-22	2020-02-26	33	36	NA	NA	NA	NA	NA	NA	Yes	Yes	Yes	NA	NA	NA	NA	NA	NA	NA	NA	NA	NA	65	92	44.2	3.26	167	NA	NA	NA	NA	NA	NA	NA	NA	NA	NA	NA	NA	NA	NA
R013	50150765	R013_383	female	56	Severe	2020-01-25	2020-02-27	2020-01-22	2021-02-07	380	383	1	No	No	Yes	4	NA	Yes	NA	NA	NA	NA	NA	NA	NA	NA	NA	NA	NA	negative	39	112	46.7	4.31	295	5.5	1.025	NA	negative	NA	negative	negative	negative	2+	negative	negative	NA	NA	1
R013	50150765	R013_4	female	56	Severe	2020-01-25	2020-02-27	2020-01-22	2020-01-25	1	4	NA	NA	NA	NA	NA	NA	NA	NA	NA	NA	NA	NA	NA	NA	NA	NA	positive	NA	NA	NA	NA	NA	NA	NA	NA	NA	NA	NA	NA	NA	NA	NA	NA	NA	NA	NA	NA	NA
R013	50150765	R013_5	female	56	Severe	2020-01-25	2020-02-27	2020-01-22	2020-01-26	2	5	NA	NA	NA	NA	NA	NA	NA	NA	NA	NA	NA	NA	NA	NA	NA	NA	NA	NA	NA	78	73	39.5	3.67	433	5	1.025	negative	negative	negative	negative	negative	negative	1+	negative	negative	0	13	70
R013	50150765	R013_52	female	56	Severe	2020-01-25	2020-02-27	2020-01-22	2020-03-13	49	52	NA	NA	NA	NA	NA	NA	NA	NA	NA	NA	NA	NA	NA	NA	NA	NA	negative	negative	NA	75	77	51.8	5.01	308	5	1.03	negative	negative	negative	negative	negative	negative	1+	negative	negative	0	11	62
R013	50150765	R013_65	female	56	Severe	2020-01-25	2020-02-27	2020-01-22	2020-03-26	62	65	NA	NA	NA	NA	NA	NA	NA	NA	NA	NA	NA	NA	NA	NA	NA	NA	negative	negative	NA	70	84	NA	5.49	370	5	1.03	negative	negative	negative	negative	negative	negative	1+	negative	negative	NA	5	25
R013	50150765	R013_7	female	56	Severe	2020-01-25	2020-02-27	2020-01-22	2020-01-28	4	7	NA	NA	NA	NA	NA	NA	NA	NA	NA	NA	NA	NA	NA	NA	NA	NA	NA	NA	NA	NA	NA	NA	NA	NA	NA	NA	NA	NA	NA	NA	NA	NA	NA	NA	NA	NA	NA	NA
R013	50150765	R013_9	female	56	Severe	2020-01-25	2020-02-27	2020-01-22	2020-01-30	6	9	NA	NA	NA	NA	NA	NA	NA	NA	NA	NA	NA	NA	NA	NA	NA	NA	NA	NA	NA	NA	NA	NA	NA	NA	NA	NA	NA	NA	NA	NA	NA	NA	NA	NA	NA	NA	NA	NA
R014	50150772	R014_1	male	10	non-Severe	2020-01-25	2020-02-19	2020-01-25	2020-01-25	1	1	NA	NA	NA	NA	NA	NA	NA	NA	NA	NA	NA	NA	NA	NA	NA	NA	positive	NA	NA	62	146	NA	5.23	378	NA	NA	NA	NA	NA	NA	NA	NA	NA	NA	NA	NA	NA	NA
R014	50150772	R014_10	male	10	non-Severe	2020-01-25	2020-02-19	2020-01-25	2020-02-03	10	10	NA	NA	NA	NA	NA	NA	NA	NA	NA	NA	NA	NA	NA	NA	NA	NA	NA	NA	positive	65	143	35.4	3.83	371	NA	NA	NA	NA	NA	NA	NA	NA	NA	NA	NA	NA	NA	NA
R014	50150772	R014_11	male	10	non-Severe	2020-01-25	2020-02-19	2020-01-25	2020-02-04	11	11	NA	NA	NA	NA	NA	NA	NA	NA	NA	NA	NA	NA	NA	NA	NA	NA	NA	NA	NA	NA	NA	NA	NA	NA	5	1.02	negative	+-	negative	negative	negative	negative	negative	negative	negative	0	8	43
R014	50150772	R014_13	male	10	non-Severe	2020-01-25	2020-02-19	2020-01-25	2020-02-06	13	13	NA	NA	NA	NA	NA	NA	NA	NA	NA	NA	NA	NA	NA	NA	NA	NA	NA	NA	NA	NA	NA	NA	NA	NA	NA	NA	NA	NA	NA	NA	NA	NA	NA	NA	NA	NA	NA	NA
R014	50150772	R014_14	male	10	non-Severe	2020-01-25	2020-02-19	2020-01-25	2020-02-07	14	14	NA	NA	NA	NA	NA	NA	NA	NA	NA	NA	NA	NA	NA	NA	NA	NA	NA	NA	positive	NA	NA	NA	NA	NA	NA	NA	NA	NA	NA	NA	NA	NA	NA	NA	NA	NA	NA	NA
R014	50150772	R014_144	male	10	non-Severe	2020-01-25	2020-02-19	2020-01-25	2020-06-16	144	144	NA	NA	NA	NA	NA	NA	NA	NA	NA	NA	NA	NA	NA	NA	NA	NA	negative	NA	NA	55	153	NA	4.25	384	5	1.03	negative	negative	negative	negative	negative	negative	negative	negative	negative	0	3	19
R014	50150772	R014_18	male	10	non-Severe	2020-01-25	2020-02-19	2020-01-25	2020-02-11	18	18	NA	NA	NA	NA	NA	NA	NA	NA	NA	NA	NA	NA	NA	NA	NA	NA	NA	NA	positive	NA	NA	NA	NA	NA	NA	NA	NA	NA	NA	NA	NA	NA	NA	NA	NA	NA	NA	NA
R014	50150772	R014_19	male	10	non-Severe	2020-01-25	2020-02-19	2020-01-25	2020/2/12	19	19	0	No	No	No	0	NA	NA	NA	NA	NA	NA	NA	NA	NA	NA	NA	NA	NA	NA	NA	NA	NA	NA	NA	NA	NA	NA	NA	NA	NA	NA	NA	NA	NA	NA	NA	NA	NA
R014	50150772	R014_2	male	10	non-Severe	2020-01-25	2020-02-19	2020-01-25	2020-01-26	2	2	NA	NA	NA	NA	NA	NA	NA	NA	NA	NA	NA	NA	NA	NA	NA	NA	NA	NA	NA	NA	NA	NA	NA	NA	NA	NA	NA	NA	NA	NA	NA	NA	NA	NA	NA	NA	NA	NA
R014	50150772	R014_20	male	10	non-Severe	2020-01-25	2020-02-19	2020-01-25	2020-02-13	20	20	NA	NA	NA	NA	NA	NA	NA	NA	NA	NA	NA	NA	NA	NA	NA	NA	NA	negative	NA	NA	NA	NA	NA	NA	NA	NA	NA	NA	NA	NA	NA	NA	NA	NA	NA	NA	NA	NA
R014	50150772	R014_21	male	10	non-Severe	2020-01-25	2020-02-19	2020-01-25	2020-02-14	21	21	NA	NA	NA	NA	NA	NA	NA	NA	Yes	NA	NA	NA	NA	NA	NA	NA	NA	NA	NA	55	153	33.8	3.6	330	NA	NA	NA	NA	NA	NA	NA	NA	NA	NA	NA	NA	NA	NA
R014	50150772	R014_22	male	10	non-Severe	2020-01-25	2020-02-19	2020-01-25	2020-02-15	22	22	NA	NA	NA	NA	NA	NA	NA	NA	NA	NA	NA	NA	NA	NA	NA	NA	NA	NA	negative	NA	NA	NA	NA	NA	NA	NA	NA	NA	NA	NA	NA	NA	NA	NA	NA	NA	NA	NA
R014	50150772	R014_23	male	10	non-Severe	2020-01-25	2020-02-19	2020-01-25	2020-02-16	23	23	NA	NA	NA	NA	NA	NA	NA	NA	NA	NA	NA	NA	NA	NA	NA	NA	NA	NA	negative	NA	NA	NA	NA	NA	NA	NA	NA	NA	NA	NA	NA	NA	NA	NA	NA	NA	NA	NA
R014	50150772	R014_24	male	10	non-Severe	2020-01-25	2020-02-19	2020-01-25	2020-02-17	24	24	NA	NA	NA	NA	NA	NA	NA	NA	NA	NA	NA	NA	NA	NA	NA	NA	NA	NA	negative	NA	NA	NA	NA	NA	NA	NA	NA	NA	NA	NA	NA	NA	NA	NA	NA	NA	NA	NA
R014	50150772	R014_25	male	10	non-Severe	2020-01-25	2020-02-19	2020-01-25	2020/2/18	25	25	NA	NA	NA	NA	NA	NA	Yes	NA	Yes	NA	NA	NA	NA	NA	NA	NA	NA	NA	NA	NA	NA	NA	NA	NA	NA	NA	NA	NA	NA	NA	NA	NA	NA	NA	NA	NA	NA	NA
R014	50150772	R014_26	male	10	non-Severe	2020-01-25	2020-02-19	2020-01-25	2020-02-19	26	26	NA	NA	NA	NA	NA	NA	NA	NA	NA	NA	NA	NA	NA	NA	NA	NA	NA	NA	negative	NA	NA	NA	NA	NA	NA	NA	NA	NA	NA	NA	NA	NA	NA	NA	NA	NA	NA	NA
R014	50150772	R014_3	male	10	non-Severe	2020-01-25	2020-02-19	2020-01-25	2020/1/27	3	3	3	Yes	No	No	4	NA	NA	NA	NA	NA	NA	NA	NA	NA	NA	NA	NA	NA	NA	NA	NA	NA	NA	NA	NA	NA	NA	NA	NA	NA	NA	NA	NA	NA	NA	NA	NA	NA
R014	50150772	R014_393	male	10	non-Severe	2020-01-25	2020-02-19	2020-01-25	2021-02-20	393	393	0	No	No	No	0	NA	Yes	NA	NA	NA	NA	NA	NA	NA	NA	NA	NA	NA	negative	37	179	45.3	3.49	449	5	1.016	NA	negative	NA	negative	negative	negative	negative	negative	negative	NA	NA	0
R014	50150772	R014_41	male	10	non-Severe	2020-01-25	2020-02-19	2020-01-25	2020-03-05	41	41	NA	NA	NA	NA	NA	NA	NA	NA	NA	NA	NA	NA	NA	NA	NA	NA	negative	negative	NA	53	155	NA	4.09	436	5	1.03	negative	negative	negative	negative	negative	negative	negative	negative	negative	NA	0	0
R014	50150772	R014_5	male	10	non-Severe	2020-01-25	2020-02-19	2020-01-25	2020-01-29	5	5	NA	NA	NA	NA	NA	NA	NA	NA	NA	NA	NA	NA	NA	NA	NA	NA	NA	NA	positive	NA	NA	NA	NA	NA	NA	NA	NA	NA	NA	NA	NA	NA	NA	NA	NA	NA	NA	NA
R014	50150772	R014_54	male	10	non-Severe	2020-01-25	2020-02-19	2020-01-25	2020-03-18	54	54	NA	NA	NA	NA	NA	NA	NA	NA	NA	NA	NA	NA	NA	NA	NA	NA	negative	negative	NA	50	159	NA	4.67	328	6	1.02	negative	negative	negative	negative	negative	negative	negative	negative	negative	0	4	23
R014	50150772	R014_6	male	10	non-Severe	2020-01-25	2020-02-19	2020-01-25	2020-01-30	6	6	NA	NA	NA	NA	NA	NA	Yes	NA	Yes	NA	NA	NA	NA	NA	NA	NA	NA	NA	NA	74	135	NA	5.33	493	NA	NA	NA	NA	NA	NA	NA	NA	NA	NA	NA	NA	NA	NA
R014	50150772	R014_9	male	10	non-Severe	2020-01-25	2020-02-19	2020-01-25	2020-02-02	9	9	NA	NA	NA	NA	NA	NA	NA	NA	NA	NA	NA	NA	NA	NA	NA	NA	NA	NA	NA	NA	NA	NA	NA	NA	NA	NA	NA	NA	NA	NA	NA	NA	NA	NA	NA	NA	NA	NA
R015	50150799	R015_11	female	43	non-Severe	2020-01-26	2020-02-01	2020-01-21	2020/1/31	6	11	1	Yes	No	No	2	NA	NA	NA	NA	NA	NA	NA	NA	NA	NA	NA	negative	negative	NA	NA	NA	NA	NA	NA	NA	NA	NA	NA	NA	NA	NA	NA	NA	NA	NA	NA	NA	NA
R015	50150799	R015_12	female	43	non-Severe	2020-01-26	2020-02-01	2020-01-21	2020-02-01	7	12	NA	NA	NA	NA	NA	NA	NA	NA	NA	NA	NA	NA	NA	NA	NA	NA	NA	negative	NA	63	104	7.1	6.46	211	NA	NA	NA	NA	NA	NA	NA	NA	NA	NA	NA	NA	NA	NA
R015	50150799	R015_26	female	43	non-Severe	2020-01-26	2020-02-01	2020-01-21	2020-02-15	21	26	NA	NA	NA	NA	NA	NA	NA	NA	NA	NA	NA	NA	NA	NA	NA	NA	NA	negative	positive	64	102	35.1	5.56	317	NA	NA	NA	NA	NA	NA	NA	NA	NA	NA	NA	NA	NA	NA
R015	50150799	R015_30	female	43	non-Severe	2020-01-26	2020-02-01	2020-01-21	2020-02-19	25	30	NA	NA	NA	NA	NA	NA	NA	NA	NA	NA	NA	NA	NA	NA	NA	NA	NA	NA	NA	NA	NA	NA	NA	NA	NA	NA	NA	NA	NA	NA	NA	NA	NA	NA	NA	NA	NA	NA
R015	50150799	R015_33	female	43	non-Severe	2020-01-26	2020-02-01	2020-01-21	2020-02-22	28	33	NA	NA	NA	NA	NA	NA	NA	NA	NA	NA	NA	NA	NA	NA	NA	NA	negative	negative	NA	66	98	NA	3.48	366	7	1.02	negative	3+	negative	negative	negative	negative	+-	negative	negative	NA	3	15
R015	50150799	R015_47	female	43	non-Severe	2020-01-26	2020-02-01	2020-01-21	2020-03-07	42	47	NA	NA	NA	NA	NA	NA	NA	NA	NA	NA	NA	NA	NA	NA	NA	NA	positive	negative	NA	65	100	27.4	3.7	283	5.5	1.015	negative	1+	negative	negative	negative	negative	negative	negative	negative	0	1	3
R015	50150799	R015_48	female	43	non-Severe	2020-01-26	2020-02-01	2020-01-21	2020-03-08	43	48	NA	NA	NA	NA	NA	NA	NA	NA	NA	NA	NA	NA	NA	NA	NA	NA	negative	NA	NA	NA	NA	NA	NA	NA	NA	NA	NA	NA	NA	NA	NA	NA	NA	NA	NA	NA	NA	NA
R015	50150799	R015_6	female	43	non-Severe	2020-01-26	2020-02-01	2020-01-21	2020-01-26	1	6	NA	NA	NA	NA	NA	NA	NA	NA	NA	NA	NA	NA	NA	NA	NA	NA	negative	NA	NA	68	95	21.4	6.72	304	5	1.025	negative	+-	negative	negative	negative	negative	negative	negative	negative	0	11	63
R015	50150799	R015_7	female	43	non-Severe	2020-01-26	2020-02-01	2020-01-21	2020/1/27	2	7	2	Yes	Yes	Yes	8	NA	NA	NA	NA	NA	NA	NA	NA	NA	NA	NA	negative	negative	NA	NA	NA	NA	NA	NA	NA	NA	NA	NA	NA	NA	NA	NA	NA	NA	NA	NA	NA	NA
R015	50150799	R015_9	female	43	non-Severe	2020-01-26	2020-02-01	2020-01-21	2020-01-29	4	9	NA	NA	NA	NA	NA	NA	NA	NA	NA	NA	NA	NA	NA	NA	NA	NA	NA	NA	negative	NA	NA	NA	NA	NA	NA	NA	NA	NA	NA	NA	NA	NA	NA	NA	NA	NA	NA	NA
R016	50150801	R016_11	male	41	non-Severe	2020-01-26	2020-02-01	2020-01-16	2020-01-26	1	11	NA	NA	NA	NA	NA	NA	NA	NA	NA	NA	NA	NA	NA	NA	NA	NA	negative	NA	NA	88	94	38.5	3.25	190	5.5	1.03	negative	negative	negative	negative	negative	negative	negative	negative	negative	0	2	10
R016	50150801	R016_12	male	41	non-Severe	2020-01-26	2020-02-01	2020-01-16	2020/1/27	2	12	4	Yes	No	No	5	NA	NA	NA	NA	NA	NA	NA	NA	NA	NA	NA	negative	negative	NA	NA	NA	NA	NA	NA	NA	NA	NA	NA	NA	NA	NA	NA	NA	NA	NA	NA	NA	NA
R016	50150801	R016_14	male	41	non-Severe	2020-01-26	2020-02-01	2020-01-16	2020-01-29	4	14	NA	NA	NA	NA	NA	NA	NA	NA	NA	NA	NA	NA	NA	NA	NA	NA	NA	NA	negative	NA	NA	NA	NA	NA	NA	NA	NA	NA	NA	NA	NA	NA	NA	NA	NA	NA	NA	NA
R016	50150801	R016_16	male	41	non-Severe	2020-01-26	2020-02-01	2020-01-16	2020-01-31	6	16	4	Yes	No	No	5	NA	NA	NA	NA	NA	NA	NA	NA	NA	NA	NA	NA	negative	NA	NA	NA	NA	NA	NA	NA	NA	NA	NA	NA	NA	NA	NA	NA	NA	NA	NA	NA	NA
R016	50150801	R016_17	male	41	non-Severe	2020-01-26	2020-02-01	2020-01-16	2020-02-01	7	17	NA	NA	NA	NA	NA	NA	NA	NA	NA	NA	NA	NA	NA	NA	NA	NA	NA	NA	NA	80	105	38	4.75	375	NA	NA	NA	NA	NA	NA	NA	NA	NA	NA	NA	NA	NA	NA
R016	50150801	R016_31	male	41	non-Severe	2020-01-26	2020-02-01	2020-01-16	2020-02-15	21	31	NA	NA	NA	NA	NA	NA	NA	NA	NA	NA	NA	NA	NA	NA	NA	NA	NA	negative	negative	91	89	63.7	4.69	389	NA	NA	NA	NA	NA	NA	NA	NA	NA	NA	NA	NA	NA	NA
R016	50150801	R016_44	male	41	non-Severe	2020-01-26	2020-02-01	2020-01-16	2020-02-28	34	44	NA	NA	NA	NA	NA	NA	NA	NA	NA	NA	NA	NA	NA	NA	NA	NA	NA	negative	negative	89	92	NA	4.81	322	5	1.03	negative	negative	negative	negative	negative	negative	negative	negative	negative	NA	0	0
R016	50150801	R016_78	male	41	non-Severe	2020-01-26	2020-02-01	2020-01-16	2020-04-02	68	78	NA	NA	NA	NA	NA	NA	NA	NA	NA	NA	NA	NA	NA	NA	NA	NA	negative	negative	NA	82	NA	53.4	3.94	328	7	1.02	negative	negative	negative	negative	negative	negative	negative	negative	negative	0	0	2
R016	50150801	R016_79	male	41	non-Severe	2020-01-26	2020-02-01	2020-01-16	2020-04-03	69	79	NA	NA	NA	NA	NA	NA	NA	NA	NA	NA	NA	NA	NA	NA	NA	NA	negative	NA	NA	NA	NA	NA	NA	NA	NA	NA	NA	NA	NA	NA	NA	NA	NA	NA	NA	NA	NA	NA
R017	50150812	R017_1	male	50	non-Severe	2020-01-26	2020-03-09	2020-01-26	2020-01-26	1	1	5	Yes	No	No	6	NA	NA	NA	NA	NA	NA	NA	NA	NA	NA	NA	NA	NA	NA	78	100	36.3	3.89	294	NA	NA	NA	NA	NA	NA	NA	NA	NA	NA	NA	NA	NA	NA
R017	50150812	R017_12	male	50	non-Severe	2020-01-26	2020-03-09	2020-01-26	2020-02-06	12	12	NA	NA	NA	NA	NA	NA	Yes	NA	Yes	NA	NA	NA	NA	NA	NA	NA	NA	NA	NA	77	101	51.6	4.11	370	NA	NA	NA	NA	NA	NA	NA	NA	NA	NA	NA	NA	NA	NA
R017	50150812	R017_13	male	50	non-Severe	2020-01-26	2020-03-09	2020-01-26	2020-02-07	13	13	NA	NA	NA	NA	NA	NA	NA	NA	NA	NA	NA	NA	NA	NA	NA	NA	NA	NA	NA	NA	NA	NA	NA	NA	NA	NA	NA	NA	NA	NA	NA	NA	NA	NA	NA	NA	NA	NA
R017	50150812	R017_14	male	50	non-Severe	2020-01-26	2020-03-09	2020-01-26	2020-02-08	14	14	NA	NA	NA	NA	NA	NA	NA	NA	NA	NA	NA	NA	NA	NA	NA	NA	NA	NA	negative	NA	NA	NA	NA	NA	NA	NA	NA	NA	NA	NA	NA	NA	NA	NA	NA	NA	NA	NA
R017	50150812	R017_16	male	50	non-Severe	2020-01-26	2020-03-09	2020-01-26	2020-02-10	16	16	NA	NA	NA	NA	NA	NA	NA	NA	NA	NA	NA	NA	NA	NA	NA	NA	NA	NA	NA	NA	NA	NA	NA	NA	NA	NA	NA	NA	NA	NA	NA	NA	NA	NA	NA	NA	NA	NA
R017	50150812	R017_164	male	50	non-Severe	2020-01-26	2020-03-09	2020-01-26	2020-07-07	164	164	NA	NA	NA	NA	NA	NA	NA	NA	NA	NA	NA	NA	NA	NA	NA	NA	NA	NA	negative	66	107	52.3	4.99	469	5	1.02	negative	+-	negative	negative	negative	negative	negative	negative	negative	0	3	18
R017	50150812	R017_169	male	50	non-Severe	2020-01-26	2020-03-09	2020-01-26	2020-07-12	169	169	NA	NA	NA	NA	NA	NA	NA	NA	NA	NA	NA	NA	NA	NA	NA	NA	NA	NA	NA	NA	NA	NA	NA	NA	NA	NA	NA	NA	NA	NA	NA	NA	NA	NA	NA	NA	NA	NA
R017	50150812	R017_171	male	50	non-Severe	2020-01-26	2020-03-09	2020-01-26	2020-07-14	171	171	NA	NA	NA	NA	NA	NA	NA	NA	NA	NA	NA	NA	NA	NA	NA	NA	NA	NA	NA	56	115	NA	2.81	274	NA	NA	NA	NA	NA	NA	NA	NA	NA	NA	NA	NA	NA	NA
R017	50150812	R017_18	male	50	non-Severe	2020-01-26	2020-03-09	2020-01-26	2020-02-12	18	18	NA	NA	NA	NA	NA	NA	NA	NA	Yes	NA	NA	NA	NA	NA	NA	NA	NA	NA	NA	72	103	46.9	3.57	303	NA	NA	NA	NA	NA	NA	NA	NA	NA	NA	NA	NA	NA	NA
R017	50150812	R017_19	male	50	non-Severe	2020-01-26	2020-03-09	2020-01-26	2020-02-13	19	19	NA	NA	NA	NA	NA	NA	NA	NA	NA	NA	NA	NA	NA	NA	NA	NA	NA	NA	negative	NA	NA	NA	NA	NA	NA	NA	NA	NA	NA	NA	NA	NA	NA	NA	NA	NA	NA	NA
R017	50150812	R017_2	male	50	non-Severe	2020-01-26	2020-03-09	2020-01-26	2020-01-27	2	2	NA	NA	NA	NA	NA	NA	NA	NA	NA	NA	NA	NA	NA	NA	NA	NA	NA	NA	positive	NA	NA	NA	NA	NA	5.5	1.02	negative	negative	negative	negative	negative	negative	negative	negative	negative	0	2	10
R017	50150812	R017_21	male	50	non-Severe	2020-01-26	2020-03-09	2020-01-26	2020-02-15	21	21	NA	NA	NA	NA	NA	NA	NA	NA	NA	NA	NA	NA	NA	NA	NA	NA	NA	NA	negative	NA	NA	NA	NA	NA	NA	NA	NA	NA	NA	NA	NA	NA	NA	NA	NA	NA	NA	NA
R017	50150812	R017_214	male	50	non-Severe	2020-01-26	2020-03-09	2020-01-26	2020-08-26	214	214	NA	NA	NA	NA	NA	NA	NA	NA	NA	NA	NA	NA	NA	NA	NA	NA	NA	NA	NA	NA	NA	NA	NA	NA	NA	NA	NA	NA	NA	NA	NA	NA	NA	NA	NA	NA	NA	NA
R017	50150812	R017_22	male	50	non-Severe	2020-01-26	2020-03-09	2020-01-26	2020-02-16	22	22	NA	NA	NA	NA	NA	NA	NA	NA	NA	NA	NA	NA	NA	NA	NA	NA	NA	negative	NA	NA	NA	NA	NA	NA	NA	NA	NA	NA	NA	NA	NA	NA	NA	NA	NA	NA	NA	NA
R017	50150812	R017_24	male	50	non-Severe	2020-01-26	2020-03-09	2020-01-26	2020-02-18	24	24	NA	NA	NA	NA	NA	NA	NA	NA	NA	NA	NA	NA	NA	NA	NA	NA	positive	NA	negative	NA	NA	NA	NA	NA	NA	NA	NA	NA	NA	NA	NA	NA	NA	NA	NA	NA	NA	NA
R017	50150812	R017_26	male	50	non-Severe	2020-01-26	2020-03-09	2020-01-26	2020-02-20	26	26	NA	NA	NA	NA	NA	NA	NA	NA	Yes	NA	NA	NA	NA	NA	NA	NA	positive	NA	NA	71	104	50.1	3.56	310	NA	NA	NA	NA	NA	NA	NA	NA	NA	NA	NA	NA	NA	NA
R017	50150812	R017_28	male	50	non-Severe	2020-01-26	2020-03-09	2020-01-26	2020-02-22	28	28	NA	NA	NA	NA	NA	NA	NA	NA	NA	NA	NA	NA	NA	NA	NA	NA	NA	NA	NA	NA	NA	NA	NA	NA	NA	NA	NA	NA	NA	NA	NA	NA	NA	NA	NA	NA	NA	NA
R017	50150812	R017_29	male	50	non-Severe	2020-01-26	2020-03-09	2020-01-26	2020-02-23	29	29	NA	NA	NA	NA	NA	NA	NA	NA	NA	NA	NA	NA	NA	NA	NA	NA	negative	negative	NA	NA	NA	NA	NA	NA	NA	NA	NA	NA	NA	NA	NA	NA	NA	NA	NA	NA	NA	NA
R017	50150812	R017_3	male	50	non-Severe	2020-01-26	2020-03-09	2020-01-26	2020-01-28	3	3	NA	NA	NA	NA	NA	NA	NA	NA	NA	NA	NA	NA	NA	NA	NA	NA	NA	NA	NA	NA	NA	NA	NA	NA	NA	NA	NA	NA	NA	NA	NA	NA	NA	NA	NA	NA	NA	NA
R017	50150812	R017_30	male	50	non-Severe	2020-01-26	2020-03-09	2020-01-26	2020-02-24	30	30	NA	NA	NA	NA	NA	NA	NA	NA	Yes	NA	NA	NA	NA	NA	NA	NA	NA	NA	NA	NA	NA	NA	NA	NA	NA	NA	NA	NA	NA	NA	NA	NA	NA	NA	NA	NA	NA	NA
R017	50150812	R017_31	male	50	non-Severe	2020-01-26	2020-03-09	2020-01-26	2020-02-25	31	31	NA	NA	NA	NA	NA	NA	NA	NA	NA	NA	NA	NA	NA	NA	NA	NA	positive	negative	NA	NA	NA	NA	NA	NA	NA	NA	NA	NA	NA	NA	NA	NA	NA	NA	NA	NA	NA	NA
R017	50150812	R017_32	male	50	non-Severe	2020-01-26	2020-03-09	2020-01-26	2020-02-26	32	32	NA	NA	NA	NA	NA	NA	NA	NA	NA	NA	NA	NA	NA	NA	NA	NA	positive	NA	NA	NA	NA	NA	NA	NA	NA	NA	NA	NA	NA	NA	NA	NA	NA	NA	NA	NA	NA	NA
R017	50150812	R017_33	male	50	non-Severe	2020-01-26	2020-03-09	2020-01-26	2020-02-27	33	33	NA	NA	NA	NA	NA	NA	NA	NA	NA	NA	NA	NA	NA	NA	NA	NA	NA	NA	NA	NA	NA	NA	NA	NA	NA	NA	NA	NA	NA	NA	NA	NA	NA	NA	NA	NA	NA	NA
R017	50150812	R017_35	male	50	non-Severe	2020-01-26	2020-03-09	2020-01-26	2020-02-29	35	35	NA	NA	NA	NA	NA	NA	NA	NA	Yes	NA	NA	NA	NA	NA	NA	NA	negative	NA	NA	76	101	42.3	3.18	342	NA	NA	NA	NA	NA	NA	NA	NA	NA	NA	NA	NA	NA	NA
R017	50150812	R017_36	male	50	non-Severe	2020-01-26	2020-03-09	2020-01-26	2020/3/1	36	36	0	No	No	No	0	NA	NA	NA	NA	NA	NA	NA	NA	NA	NA	NA	positive	NA	positive	NA	NA	NA	NA	NA	NA	NA	NA	NA	NA	NA	NA	NA	NA	NA	NA	NA	NA	NA
R017	50150812	R017_37	male	50	non-Severe	2020-01-26	2020-03-09	2020-01-26	2020-03-02	37	37	NA	NA	NA	NA	NA	NA	NA	NA	NA	NA	NA	NA	NA	NA	NA	NA	positive	negative	NA	NA	NA	NA	NA	NA	NA	NA	NA	NA	NA	NA	NA	NA	NA	NA	NA	NA	NA	NA
R017	50150812	R017_380	male	50	non-Severe	2020-01-26	2020-03-09	2020-01-26	2021-02-08	380	380	0	No	No	No	0	NA	Yes	NA	NA	NA	NA	NA	NA	NA	NA	NA	NA	NA	negative	58	112	55	6.25	377	5.5	1.031	NA	negative	NA	negative	negative	negative	negative	negative	negative	NA	NA	0
R017	50150812	R017_39	male	50	non-Severe	2020-01-26	2020-03-09	2020-01-26	2020-03-04	39	39	NA	NA	NA	NA	NA	NA	NA	NA	NA	NA	NA	NA	NA	NA	NA	NA	negative	NA	NA	NA	NA	NA	NA	NA	NA	NA	NA	NA	NA	NA	NA	NA	NA	NA	NA	NA	NA	NA
R017	50150812	R017_40	male	50	non-Severe	2020-01-26	2020-03-09	2020-01-26	2020-03-05	40	40	NA	NA	NA	NA	NA	NA	NA	NA	NA	NA	NA	NA	NA	NA	NA	NA	positive	NA	NA	NA	NA	NA	NA	NA	NA	NA	NA	NA	NA	NA	NA	NA	NA	NA	NA	NA	NA	NA
R017	50150812	R017_41	male	50	non-Severe	2020-01-26	2020-03-09	2020-01-26	2020-03-06	41	41	NA	NA	NA	NA	NA	NA	NA	NA	NA	NA	NA	NA	NA	NA	NA	NA	negative	negative	NA	NA	NA	NA	NA	NA	NA	NA	NA	NA	NA	NA	NA	NA	NA	NA	NA	NA	NA	NA
R017	50150812	R017_42	male	50	non-Severe	2020-01-26	2020-03-09	2020-01-26	2020-03-07	42	42	NA	NA	NA	NA	NA	NA	NA	NA	NA	NA	NA	NA	NA	NA	NA	negative	NA	NA	NA	NA	NA	NA	NA	NA	NA	NA	NA	NA	NA	NA	NA	NA	NA	NA	NA	NA	NA	NA
R017	50150812	R017_44	male	50	non-Severe	2020-01-26	2020-03-09	2020-01-26	2020-03-09	44	44	NA	NA	NA	NA	NA	NA	Yes	NA	Yes	NA	NA	NA	NA	NA	NA	NA	NA	NA	NA	NA	NA	NA	NA	NA	NA	NA	NA	NA	NA	NA	NA	NA	NA	NA	NA	NA	NA	NA
R017	50150812	R017_5	male	50	non-Severe	2020-01-26	2020-03-09	2020-01-26	2020-01-30	5	5	NA	NA	NA	NA	NA	NA	NA	NA	NA	NA	NA	NA	NA	NA	NA	NA	NA	NA	NA	NA	NA	NA	NA	NA	NA	NA	NA	NA	NA	NA	NA	NA	NA	NA	NA	NA	NA	NA
R017	50150812	R017_59	male	50	non-Severe	2020-01-26	2020-03-09	2020-01-26	2020-03-24	59	59	NA	NA	NA	NA	NA	NA	NA	NA	NA	NA	NA	NA	NA	NA	NA	NA	negative	negative	NA	NA	NA	NA	NA	NA	5	1.02	negative	negative	negative	negative	negative	negative	negative	negative	negative	0	3	19
R017	50150812	R017_6	male	50	non-Severe	2020-01-26	2020-03-09	2020-01-26	2020-01-31	6	6	NA	NA	NA	NA	NA	NA	NA	NA	NA	NA	NA	NA	NA	NA	NA	NA	NA	NA	NA	NA	NA	NA	NA	NA	NA	NA	NA	NA	NA	NA	NA	NA	NA	NA	NA	NA	NA	NA
R017	50150812	R017_72	male	50	non-Severe	2020-01-26	2020-03-09	2020-01-26	2020-04-06	72	72	NA	NA	NA	NA	NA	NA	NA	NA	NA	NA	NA	NA	NA	NA	NA	NA	negative	negative	NA	72	103	42.8	5.54	375	6	1.025	negative	negative	negative	negative	negative	negative	+-	negative	negative	0	6	32
R017	50150812	R017_746	male	50	non-Severe	2020-01-26	2020-03-09	2020-01-26	2022-02-09	746	746	NA	NA	NA	NA	NA	NA	NA	NA	NA	NA	NA	NA	NA	NA	NA	NA	NA	NA	NA	63	107	59.4	5.62	424	5.5	1.022	negative	negative	negative	negative	negative	negative	negative	negative	negative	0	1	4
R018	50150813	R018_10	female	45	non-Severe	2020-01-26	2020-02-15	2020-01-22	2020-01-31	6	10	NA	NA	NA	NA	NA	NA	NA	NA	NA	NA	NA	NA	NA	NA	NA	NA	NA	NA	NA	NA	NA	NA	NA	NA	NA	NA	NA	NA	NA	NA	NA	NA	NA	NA	NA	NA	NA	NA
R018	50150813	R018_14	female	45	non-Severe	2020-01-26	2020-02-15	2020-01-22	2020-02-04	10	14	4	Yes	Yes	Yes	10	NA	NA	NA	NA	NA	NA	NA	NA	NA	NA	NA	NA	NA	NA	NA	NA	NA	NA	NA	NA	NA	NA	NA	NA	NA	NA	NA	NA	NA	NA	NA	NA	NA
R018	50150813	R018_16	female	45	non-Severe	2020-01-26	2020-02-15	2020-01-22	2020-02-06	12	16	NA	NA	NA	NA	NA	NA	NA	NA	NA	NA	NA	NA	NA	NA	NA	NA	NA	NA	NA	55	109	10.7	1.93	207	NA	NA	NA	NA	NA	NA	NA	NA	NA	NA	NA	NA	NA	NA
R018	50150813	R018_17	female	45	non-Severe	2020-01-26	2020-02-15	2020-01-22	2020-02-07	13	17	NA	NA	NA	NA	NA	Yes	Yes	Yes	NA	NA	NA	NA	NA	NA	NA	NA	NA	NA	negative	NA	NA	NA	NA	NA	NA	NA	NA	NA	NA	NA	NA	NA	NA	NA	NA	NA	NA	NA
R018	50150813	R018_18	female	45	non-Severe	2020-01-26	2020-02-15	2020-01-22	2020-02-08	14	18	NA	NA	NA	NA	NA	NA	NA	NA	NA	NA	NA	NA	NA	NA	NA	NA	NA	NA	NA	NA	NA	NA	NA	NA	NA	NA	NA	NA	NA	NA	NA	NA	NA	NA	NA	NA	NA	NA
R018	50150813	R018_19	female	45	non-Severe	2020-01-26	2020-02-15	2020-01-22	2020-02-09	15	19	NA	NA	NA	NA	NA	NA	NA	NA	NA	NA	NA	NA	NA	NA	NA	NA	NA	NA	negative	NA	NA	NA	NA	NA	NA	NA	NA	NA	NA	NA	NA	NA	NA	NA	NA	NA	NA	NA
R018	50150813	R018_21	female	45	non-Severe	2020-01-26	2020-02-15	2020-01-22	2020/2/11	17	21	4	Yes	No	Yes	8	NA	NA	NA	NA	NA	NA	NA	NA	NA	NA	NA	negative	negative	NA	NA	NA	NA	NA	NA	NA	NA	NA	NA	NA	NA	NA	NA	NA	NA	NA	NA	NA	NA
R018	50150813	R018_22	female	45	non-Severe	2020-01-26	2020-02-15	2020-01-22	2020-02-12	18	22	NA	NA	NA	NA	NA	NA	NA	NA	NA	NA	NA	NA	NA	NA	NA	NA	NA	negative	NA	NA	NA	NA	NA	NA	NA	NA	NA	NA	NA	NA	NA	NA	NA	NA	NA	NA	NA	NA
R018	50150813	R018_23	female	45	non-Severe	2020-01-26	2020-02-15	2020-01-22	2020-02-13	19	23	NA	NA	NA	NA	NA	NA	Yes	NA	NA	NA	NA	NA	NA	NA	NA	NA	NA	NA	NA	NA	NA	NA	NA	NA	NA	NA	NA	NA	NA	NA	NA	NA	NA	NA	NA	NA	NA	NA
R018	50150813	R018_386	female	45	non-Severe	2020-01-26	2020-02-15	2020-01-22	2021-02-10	382	386	0	No	No	No	0	NA	Yes	NA	NA	NA	NA	NA	NA	NA	NA	NA	negative	NA	NA	48	113	40.3	6.4	325	6.5	1.012	NA	negative	NA	negative	negative	negative	negative	negative	negative	NA	NA	0
R018	50150813	R018_39	female	45	non-Severe	2020-01-26	2020-02-15	2020-01-22	2020-02-29	35	39	NA	NA	NA	NA	NA	NA	NA	NA	NA	NA	NA	NA	NA	NA	NA	NA	negative	negative	NA	61	105	NA	3.65	348	5	1.03	negative	+-	negative	negative	negative	negative	1+	negative	negative	0	12	64
R018	50150813	R018_5	female	45	non-Severe	2020-01-26	2020-02-15	2020-01-22	2020-01-26	1	5	NA	NA	NA	NA	NA	NA	NA	NA	NA	NA	NA	NA	NA	NA	NA	NA	NA	NA	negative	59	107	24.3	3.04	238	NA	NA	NA	NA	NA	NA	NA	NA	NA	NA	NA	NA	NA	NA
R018	50150813	R018_55	female	45	non-Severe	2020-01-26	2020-02-15	2020-01-22	2020-03-16	51	55	NA	NA	NA	NA	NA	NA	NA	NA	NA	NA	NA	NA	NA	NA	NA	NA	negative	negative	NA	63	103	NA	6.11	400	5	1.03	negative	3+	negative	negative	negative	negative	negative	negative	negative	0	1	3
R018	50150813	R018_56	female	45	non-Severe	2020-01-26	2020-02-15	2020-01-22	2020-03-17	52	56	NA	NA	NA	NA	NA	NA	NA	NA	NA	NA	NA	NA	NA	NA	NA	NA	negative	NA	NA	NA	NA	NA	NA	NA	NA	NA	NA	NA	NA	NA	NA	NA	NA	NA	NA	NA	NA	NA
R018	50150813	R018_6	female	45	non-Severe	2020-01-26	2020-02-15	2020-01-22	2020-01-27	2	6	NA	NA	NA	NA	NA	NA	NA	NA	NA	NA	Yes	NA	NA	NA	NA	NA	NA	NA	negative	NA	NA	NA	NA	NA	7	1.02	negative	negative	negative	negative	negative	negative	negative	negative	negative	0	1	5
R018	50150813	R018_750	female	45	non-Severe	2020-01-26	2020-02-15	2020-01-22	2022-02-09	746	750	NA	NA	NA	NA	NA	NA	NA	NA	NA	NA	NA	NA	NA	NA	NA	NA	NA	NA	NA	62	103	37.1	4.32	309	5.5	1.01	negative	negative	negative	negative	negative	negative	negative	negative	negative	0	0	1
R018	50150813	R018_9	female	45	non-Severe	2020-01-26	2020-02-15	2020-01-22	2020-01-30	5	9	4	Yes	Yes	No	7	NA	NA	NA	NA	NA	NA	NA	NA	NA	NA	NA	NA	NA	NA	NA	NA	NA	NA	NA	NA	NA	NA	NA	NA	NA	NA	NA	NA	NA	NA	NA	NA	NA
R019	50150841	R019_10	female	57	non-Severe	2020-01-27	2020-02-08	2020-01-18	2020-01-27	1	10	NA	NA	NA	NA	NA	NA	NA	NA	NA	NA	NA	NA	NA	NA	NA	NA	NA	NA	NA	62	125	26.6	2.16	239	NA	NA	NA	NA	NA	NA	NA	NA	NA	NA	NA	NA	NA	NA
R019	50150841	R019_11	female	57	non-Severe	2020-01-27	2020-02-08	2020-01-18	2020-01-28	2	11	NA	NA	NA	NA	NA	NA	NA	NA	NA	NA	NA	NA	NA	NA	NA	NA	NA	NA	NA	NA	NA	NA	NA	NA	6	1.015	2+	+-	negative	negative	negative	negative	2+	negative	negative	0	20	112
R019	50150841	R019_12	female	57	non-Severe	2020-01-27	2020-02-08	2020-01-18	2020-01-29	3	12	NA	NA	NA	NA	NA	NA	NA	NA	NA	NA	NA	NA	NA	NA	NA	NA	NA	NA	NA	NA	NA	NA	NA	NA	5.5	1.02	1+	+-	negative	negative	negative	negative	2+	negative	negative	0	123	679
R019	50150841	R019_13	female	57	non-Severe	2020-01-27	2020-02-08	2020-01-18	2020-01-30	4	13	NA	NA	NA	NA	NA	NA	NA	NA	NA	NA	NA	NA	NA	NA	NA	NA	NA	NA	NA	NA	NA	NA	NA	NA	NA	NA	NA	NA	NA	NA	NA	NA	NA	NA	NA	NA	NA	NA
R019	50150841	R019_14	female	57	non-Severe	2020-01-27	2020-02-08	2020-01-18	2020-01-31	5	14	2	Yes	Yes	Yes	8	NA	NA	NA	NA	NA	NA	NA	NA	NA	NA	NA	NA	NA	NA	NA	NA	NA	NA	NA	7.5	1.015	negative	negative	+-	negative	negative	negative	2+	negative	negative	0	210	1154
R019	50150841	R019_146	female	57	non-Severe	2020-01-27	2020-02-08	2020-01-18	2020-06-11	137	146	NA	NA	NA	NA	NA	NA	NA	NA	NA	NA	NA	NA	NA	NA	NA	NA	NA	NA	NA	64	92	NA	5.16	444	5.5	1.025	negative	negative	negative	negative	negative	negative	negative	negative	negative	0	5	29
R019	50150841	R019_15	female	57	non-Severe	2020-01-27	2020-02-08	2020-01-18	2020-02-01	6	15	NA	NA	NA	NA	NA	NA	NA	NA	NA	NA	NA	NA	NA	NA	NA	NA	NA	NA	NA	NA	NA	NA	NA	NA	7.5	1.015	negative	negative	negative	negative	negative	negative	negative	negative	negative	0	5	30
R019	50150841	R019_17	female	57	non-Severe	2020-01-27	2020-02-08	2020-01-18	2020-02-03	8	17	NA	NA	NA	NA	NA	NA	NA	NA	NA	NA	NA	NA	NA	NA	NA	NA	NA	NA	NA	NA	NA	NA	NA	NA	6.5	1.02	negative	negative	negative	negative	negative	negative	negative	negative	negative	0	8	46
R019	50150841	R019_18	female	57	non-Severe	2020-01-27	2020-02-08	2020-01-18	2020-02-04	9	18	NA	NA	NA	NA	NA	NA	NA	NA	NA	NA	NA	NA	NA	NA	NA	NA	NA	NA	negative	NA	NA	NA	NA	NA	NA	NA	NA	NA	NA	NA	NA	NA	NA	NA	NA	NA	NA	NA
R019	50150841	R019_19	female	57	non-Severe	2020-01-27	2020-02-08	2020-01-18	2020/2/5	10	19	2	Yes	No	Yes	6	NA	NA	NA	NA	NA	NA	NA	NA	NA	NA	NA	NA	NA	NA	NA	NA	NA	NA	NA	NA	NA	NA	NA	NA	NA	NA	NA	NA	NA	NA	NA	NA	NA
R019	50150841	R019_20	female	57	non-Severe	2020-01-27	2020-02-08	2020-01-18	2020-02-06	11	20	NA	NA	NA	NA	NA	NA	NA	NA	NA	NA	NA	NA	NA	NA	NA	NA	NA	negative	negative	66	89	26	4.58	282	NA	NA	NA	NA	NA	NA	NA	NA	NA	NA	NA	NA	NA	NA
R019	50150841	R019_21	female	57	non-Severe	2020-01-27	2020-02-08	2020-01-18	2020-02-07	12	21	NA	NA	NA	NA	NA	NA	NA	NA	NA	NA	NA	NA	NA	NA	NA	NA	NA	NA	NA	NA	NA	NA	NA	NA	NA	NA	NA	NA	NA	NA	NA	NA	NA	NA	NA	NA	NA	NA
R019	50150841	R019_24	female	57	non-Severe	2020-01-27	2020-02-08	2020-01-18	2020-02-10	15	24	NA	NA	NA	NA	NA	NA	NA	NA	NA	NA	NA	NA	NA	NA	NA	NA	NA	negative	NA	NA	NA	NA	NA	NA	NA	NA	NA	NA	NA	NA	NA	NA	NA	NA	NA	NA	NA	NA
R019	50150841	R019_36	female	57	non-Severe	2020-01-27	2020-02-08	2020-01-18	2020-02-22	27	36	NA	NA	NA	NA	NA	NA	NA	NA	NA	NA	NA	NA	NA	NA	NA	NA	negative	negative	NA	65	91	NA	3.99	350	6.5	1.015	negative	negative	negative	negative	negative	negative	negative	negative	negative	NA	0	0
R019	50150841	R019_389	female	57	non-Severe	2020-01-27	2020-02-08	2020-01-18	2021-02-09	380	389	0	No	No	No	0	NA	NA	NA	NA	NA	NA	NA	NA	NA	NA	NA	negative	NA	NA	47	105	49.8	6.43	372	5.5	1.027	NA	negative	NA	negative	negative	negative	negative	negative	negative	NA	NA	4
R019	50150841	R019_50	female	57	non-Severe	2020-01-27	2020-02-08	2020-01-18	2020-03-07	41	50	NA	NA	NA	NA	NA	NA	NA	NA	NA	NA	NA	NA	NA	NA	NA	NA	negative	NA	NA	64	93	35.7	5.56	378	6	1.025	negative	negative	negative	negative	negative	negative	+-	negative	negative	0	10	55
R019	50150841	R019_52	female	57	non-Severe	2020-01-27	2020-02-08	2020-01-18	2020-03-09	43	52	NA	NA	NA	NA	NA	NA	NA	NA	NA	NA	NA	NA	NA	NA	NA	NA	NA	NA	NA	NA	NA	NA	NA	NA	NA	NA	NA	NA	NA	NA	NA	NA	NA	NA	NA	NA	NA	NA
R019	50150841	R019_754	female	57	non-Severe	2020-01-27	2020-02-08	2020-01-18	2022-02-09	745	754	NA	NA	NA	NA	NA	NA	NA	NA	NA	NA	NA	NA	NA	NA	NA	NA	NA	NA	NA	52	100	45.5	6.1	369	5.5	1.018	negative	negative	negative	negative	negative	negative	negative	negative	negative	0	2	13
R020	50150844	R020_13	male	51	Severe	2020-01-27	2020-02-18	2020-01-15	2020-01-27	1	13	NA	NA	NA	NA	NA	NA	NA	NA	Yes	NA	NA	NA	NA	NA	NA	NA	NA	NA	NA	98	77	24.4	4.91	263	NA	NA	NA	NA	NA	NA	NA	NA	NA	NA	NA	NA	NA	NA
R020	50150844	R020_14	male	51	Severe	2020-01-27	2020-02-18	2020-01-15	2020-01-28	2	14	3	Yes	Yes	No	6	NA	NA	Yes	NA	NA	NA	NA	NA	NA	NA	NA	NA	NA	NA	NA	NA	NA	NA	NA	NA	NA	NA	NA	NA	NA	NA	NA	NA	NA	NA	NA	NA	NA
R020	50150844	R020_15	male	51	Severe	2020-01-27	2020-02-18	2020-01-15	2020-01-29	3	15	NA	NA	NA	NA	NA	NA	NA	NA	NA	NA	NA	NA	NA	NA	NA	NA	NA	NA	NA	NA	NA	NA	NA	NA	6	1.02	negative	+-	1+	2+	negative	negative	negative	negative	negative	0	3	14
R020	50150844	R020_16	male	51	Severe	2020-01-27	2020-02-18	2020-01-15	2020-01-30	4	16	NA	NA	NA	NA	NA	NA	NA	NA	NA	NA	NA	NA	NA	NA	NA	NA	NA	NA	negative	NA	NA	NA	NA	NA	NA	NA	NA	NA	NA	NA	NA	NA	NA	NA	NA	NA	NA	NA
R020	50150844	R020_17	male	51	Severe	2020-01-27	2020-02-18	2020-01-15	2020-01-31	5	17	NA	NA	NA	NA	NA	NA	NA	NA	NA	NA	NA	NA	NA	NA	NA	NA	NA	NA	NA	NA	NA	NA	NA	NA	NA	NA	NA	NA	NA	NA	NA	NA	NA	NA	NA	NA	NA	NA
R020	50150844	R020_20	male	51	Severe	2020-01-27	2020-02-18	2020-01-15	2020-02-03	8	20	NA	NA	NA	NA	NA	NA	NA	NA	NA	NA	NA	NA	NA	NA	NA	NA	NA	NA	NA	NA	NA	NA	NA	NA	NA	NA	NA	NA	NA	NA	NA	NA	NA	NA	NA	NA	NA	NA
R020	50150844	R020_21	male	51	Severe	2020-01-27	2020-02-18	2020-01-15	2020-02-04	9	21	NA	NA	NA	NA	NA	NA	NA	NA	NA	NA	NA	NA	NA	NA	NA	NA	NA	NA	negative	NA	NA	NA	NA	NA	NA	NA	NA	NA	NA	NA	NA	NA	NA	NA	NA	NA	NA	NA
R020	50150844	R020_22	male	51	Severe	2020-01-27	2020-02-18	2020-01-15	2020-02-05	10	22	NA	NA	NA	NA	NA	NA	NA	NA	NA	NA	NA	NA	NA	NA	NA	NA	NA	NA	NA	NA	NA	NA	NA	NA	NA	NA	NA	NA	NA	NA	NA	NA	NA	NA	NA	NA	NA	NA
R020	50150844	R020_23	male	51	Severe	2020-01-27	2020-02-18	2020-01-15	2020-02-06	11	23	3	Yes	Yes	Yes	9	NA	NA	NA	Yes	NA	NA	NA	NA	NA	NA	NA	NA	negative	NA	97	78	62.4	9.1	330	NA	NA	NA	NA	NA	NA	NA	NA	NA	NA	NA	NA	NA	NA
R020	50150844	R020_24	male	51	Severe	2020-01-27	2020-02-18	2020-01-15	2020-02-07	12	24	NA	NA	NA	NA	NA	NA	NA	Yes	NA	NA	Yes	NA	NA	NA	NA	NA	NA	NA	positive	NA	NA	NA	NA	NA	NA	NA	NA	NA	NA	NA	NA	NA	NA	NA	NA	NA	NA	NA
R020	50150844	R020_26	male	51	Severe	2020-01-27	2020-02-18	2020-01-15	2020-02-09	14	26	NA	NA	NA	NA	NA	NA	NA	NA	NA	NA	NA	NA	NA	NA	NA	NA	NA	NA	negative	NA	NA	NA	NA	NA	NA	NA	NA	NA	NA	NA	NA	NA	NA	NA	NA	NA	NA	NA
R020	50150844	R020_27	male	51	Severe	2020-01-27	2020-02-18	2020-01-15	2020-02-10	15	27	NA	NA	NA	NA	NA	NA	NA	NA	NA	NA	NA	NA	NA	NA	NA	NA	NA	negative	NA	NA	NA	NA	NA	NA	NA	NA	NA	NA	NA	NA	NA	NA	NA	NA	NA	NA	NA	NA
R020	50150844	R020_28	male	51	Severe	2020-01-27	2020-02-18	2020-01-15	2020-02-11	16	28	NA	NA	NA	NA	NA	NA	NA	NA	NA	NA	NA	NA	NA	NA	NA	NA	NA	NA	negative	NA	NA	NA	NA	NA	NA	NA	NA	NA	NA	NA	NA	NA	NA	NA	NA	NA	NA	NA
R020	50150844	R020_31	male	51	Severe	2020-01-27	2020-02-18	2020-01-15	2020-02-14	19	31	NA	NA	NA	NA	NA	NA	NA	NA	NA	NA	NA	NA	NA	NA	NA	NA	NA	NA	negative	NA	NA	NA	NA	NA	NA	NA	NA	NA	NA	NA	NA	NA	NA	NA	NA	NA	NA	NA
R020	50150844	R020_32	male	51	Severe	2020-01-27	2020-02-18	2020-01-15	2020-02-15	20	32	2	Yes	No	Yes	6	NA	NA	NA	NA	NA	NA	NA	NA	NA	NA	NA	NA	negative	negative	NA	NA	NA	NA	NA	NA	NA	NA	NA	NA	NA	NA	NA	NA	NA	NA	NA	NA	NA
R020	50150844	R020_34	male	51	Severe	2020-01-27	2020-02-18	2020-01-15	2020-02-17	22	34	NA	NA	NA	NA	NA	NA	NA	NA	NA	NA	NA	NA	NA	NA	NA	NA	negative	NA	NA	NA	NA	NA	NA	NA	NA	NA	NA	NA	NA	NA	NA	NA	NA	NA	NA	NA	NA	NA
R020	50150844	R020_35	male	51	Severe	2020-01-27	2020-02-18	2020-01-15	2020-02-18	23	35	NA	NA	NA	NA	NA	NA	NA	Yes	Yes	NA	NA	NA	NA	NA	NA	NA	NA	NA	NA	NA	NA	NA	NA	NA	NA	NA	NA	NA	NA	NA	NA	NA	NA	NA	NA	NA	NA	NA
R021	50150845	R021_10	male	52	non-Severe	2020-01-27	2020-02-08	2020-01-21	2020/1/30	4	10	2	Yes	No	Yes	6	NA	NA	NA	NA	NA	NA	NA	NA	NA	NA	NA	NA	NA	negative	NA	NA	NA	NA	NA	NA	NA	NA	NA	NA	NA	NA	NA	NA	NA	NA	NA	NA	NA
R021	50150845	R021_11	male	52	non-Severe	2020-01-27	2020-02-08	2020-01-21	2020-01-31	5	11	NA	NA	NA	NA	NA	NA	NA	NA	NA	NA	NA	NA	NA	NA	NA	NA	NA	NA	negative	NA	NA	NA	NA	NA	5.5	1.03	+-	1+	negative	negative	negative	negative	negative	1+	negative	0	5	29
R021	50150845	R021_14	male	52	non-Severe	2020-01-27	2020-02-08	2020-01-21	2020-02-03	8	14	NA	NA	NA	NA	NA	NA	NA	NA	NA	NA	NA	NA	NA	NA	NA	NA	NA	NA	negative	NA	NA	NA	NA	NA	NA	NA	NA	NA	NA	NA	NA	NA	NA	NA	NA	NA	NA	NA
R021	50150845	R021_15	male	52	non-Severe	2020-01-27	2020-02-08	2020-01-21	2020/2/4	9	15	2	Yes	No	Yes	6	NA	NA	NA	NA	NA	NA	NA	NA	NA	NA	NA	NA	NA	NA	NA	NA	NA	NA	NA	NA	NA	NA	NA	NA	NA	NA	NA	NA	NA	NA	NA	NA	NA
R021	50150845	R021_16	male	52	non-Severe	2020-01-27	2020-02-08	2020-01-21	2020-02-05	10	16	NA	NA	NA	NA	NA	NA	NA	NA	NA	NA	NA	NA	NA	NA	NA	NA	NA	positive	NA	NA	NA	NA	NA	NA	NA	NA	NA	NA	NA	NA	NA	NA	NA	NA	NA	NA	NA	NA
R021	50150845	R021_17	male	52	non-Severe	2020-01-27	2020-02-08	2020-01-21	2020-02-06	11	17	NA	NA	NA	NA	NA	NA	NA	NA	NA	NA	NA	Yes	NA	Yes	Yes	NA	NA	NA	NA	81	96	33.3	3.03	295	NA	NA	NA	NA	NA	NA	NA	NA	NA	NA	NA	NA	NA	NA
R021	50150845	R021_18	male	52	non-Severe	2020-01-27	2020-02-08	2020-01-21	2020-02-07	12	18	NA	NA	NA	NA	NA	NA	NA	NA	NA	Yes	NA	NA	NA	NA	NA	NA	NA	NA	NA	NA	NA	NA	NA	NA	NA	NA	NA	NA	NA	NA	NA	NA	NA	NA	NA	NA	NA	NA
R021	50150845	R021_7	male	52	non-Severe	2020-01-27	2020-02-08	2020-01-21	2020-01-27	1	7	NA	NA	NA	NA	NA	NA	NA	NA	NA	NA	NA	NA	NA	NA	NA	NA	NA	NA	NA	74	101	32.3	4.85	344	NA	NA	NA	NA	NA	NA	NA	NA	NA	NA	NA	NA	NA	NA
R021	50150845	R021_8	male	52	non-Severe	2020-01-27	2020-02-08	2020-01-21	2020-01-28	2	8	NA	NA	NA	NA	NA	NA	NA	NA	NA	NA	NA	NA	NA	NA	NA	NA	NA	NA	NA	NA	NA	NA	NA	NA	NA	NA	NA	NA	NA	NA	NA	NA	NA	NA	NA	NA	NA	NA
R021	50150845	R021_9	male	52	non-Severe	2020-01-27	2020-02-08	2020-01-21	2020-01-29	3	9	NA	NA	NA	NA	NA	NA	NA	NA	NA	NA	NA	NA	NA	NA	NA	NA	NA	NA	NA	NA	NA	NA	NA	NA	5.5	1.03	negative	3+	negative	negative	negative	negative	negative	negative	negative	0	7	38
R022	50150846	R022_11	female	55	non-Severe	2020-01-27	2020-02-18	2020-01-17	2020-01-27	1	11	NA	NA	NA	NA	NA	NA	NA	NA	NA	NA	NA	NA	NA	NA	NA	NA	NA	NA	NA	72	104	22.2	3.63	202	NA	NA	NA	NA	NA	NA	NA	NA	NA	NA	NA	NA	NA	NA
R022	50150846	R022_12	female	55	non-Severe	2020-01-27	2020-02-18	2020-01-17	2020-01-28	2	12	5	Yes	Yes	No	8	NA	NA	NA	NA	NA	NA	NA	NA	NA	NA	NA	NA	NA	NA	NA	NA	NA	NA	NA	6	1.02	negative	negative	+-	negative	negative	negative	negative	negative	negative	0	31	173
R022	50150846	R022_13	female	55	non-Severe	2020-01-27	2020-02-18	2020-01-17	2020-01-29	3	13	NA	NA	NA	NA	NA	NA	NA	NA	NA	NA	NA	NA	NA	NA	NA	NA	NA	NA	NA	NA	NA	NA	NA	NA	NA	NA	NA	NA	NA	NA	NA	NA	NA	NA	NA	NA	NA	NA
R022	50150846	R022_14	female	55	non-Severe	2020-01-27	2020-02-18	2020-01-17	2020-01-30	4	14	NA	NA	NA	NA	NA	NA	NA	NA	NA	NA	NA	NA	NA	NA	NA	NA	NA	NA	NA	NA	NA	NA	NA	NA	NA	NA	NA	NA	NA	NA	NA	NA	NA	NA	NA	NA	NA	NA
R022	50150846	R022_15	female	55	non-Severe	2020-01-27	2020-02-18	2020-01-17	2020-01-31	5	15	NA	NA	NA	NA	NA	NA	NA	NA	NA	NA	NA	NA	NA	NA	NA	NA	NA	NA	NA	NA	NA	NA	NA	NA	NA	NA	NA	NA	NA	NA	NA	NA	NA	NA	NA	NA	NA	NA
R022	50150846	R022_18	female	55	non-Severe	2020-01-27	2020-02-18	2020-01-17	2020-02-03	8	18	NA	NA	NA	NA	NA	NA	NA	NA	NA	NA	NA	NA	NA	NA	NA	NA	NA	NA	NA	NA	NA	NA	NA	NA	NA	NA	NA	NA	NA	NA	NA	NA	NA	NA	NA	NA	NA	NA
R022	50150846	R022_20	female	55	non-Severe	2020-01-27	2020-02-18	2020-01-17	2020-02-05	10	20	NA	NA	NA	NA	NA	NA	NA	NA	NA	NA	NA	NA	NA	NA	NA	NA	NA	NA	positive	NA	NA	NA	NA	NA	NA	NA	NA	NA	NA	NA	NA	NA	NA	NA	NA	NA	NA	NA
R022	50150846	R022_21	female	55	non-Severe	2020-01-27	2020-02-18	2020-01-17	2020-02-06	11	21	NA	NA	NA	NA	NA	NA	NA	NA	NA	NA	NA	NA	NA	NA	NA	NA	NA	NA	NA	69	86	43.2	6.39	243	NA	NA	NA	NA	NA	NA	NA	NA	NA	NA	NA	NA	NA	NA
R022	50150846	R022_22	female	55	non-Severe	2020-01-27	2020-02-18	2020-01-17	2020-02-07	12	22	NA	NA	NA	NA	NA	NA	NA	NA	NA	NA	NA	NA	NA	NA	NA	NA	NA	NA	NA	NA	NA	NA	NA	NA	NA	NA	NA	NA	NA	NA	NA	NA	NA	NA	NA	NA	NA	NA
R022	50150846	R022_23	female	55	non-Severe	2020-01-27	2020-02-18	2020-01-17	2020-02-08	13	23	5	Yes	No	No	6	NA	NA	NA	NA	NA	NA	NA	NA	NA	NA	NA	negative	negative	NA	NA	NA	NA	NA	NA	NA	NA	NA	NA	NA	NA	NA	NA	NA	NA	NA	NA	NA	NA
R022	50150846	R022_24	female	55	non-Severe	2020-01-27	2020-02-18	2020-01-17	2020-02-09	14	24	NA	NA	NA	NA	NA	NA	NA	NA	NA	NA	NA	NA	NA	NA	NA	NA	NA	NA	negative	NA	NA	NA	NA	NA	NA	NA	NA	NA	NA	NA	NA	NA	NA	NA	NA	NA	NA	NA
R022	50150846	R022_25	female	55	non-Severe	2020-01-27	2020-02-18	2020-01-17	2020-02-10	15	25	NA	NA	NA	NA	NA	NA	NA	NA	NA	NA	NA	NA	NA	NA	NA	NA	NA	NA	NA	NA	NA	NA	NA	NA	NA	NA	NA	NA	NA	NA	NA	NA	NA	NA	NA	NA	NA	NA
R022	50150846	R022_26	female	55	non-Severe	2020-01-27	2020-02-18	2020-01-17	2020-02-11	16	26	NA	NA	NA	NA	NA	NA	NA	NA	NA	NA	NA	NA	NA	NA	NA	NA	NA	NA	negative	NA	NA	NA	NA	NA	NA	NA	NA	NA	NA	NA	NA	NA	NA	NA	NA	NA	NA	NA
R022	50150846	R022_28	female	55	non-Severe	2020-01-27	2020-02-18	2020-01-17	2020-02-13	18	28	NA	NA	NA	NA	NA	NA	NA	NA	NA	NA	NA	NA	NA	NA	NA	NA	NA	NA	NA	70	84	36	3.69	245	NA	NA	NA	NA	NA	NA	NA	NA	NA	NA	NA	NA	NA	NA
R022	50150846	R022_29	female	55	non-Severe	2020-01-27	2020-02-18	2020-01-17	2020-02-14	19	29	2	Yes	No	No	3	NA	NA	NA	NA	NA	NA	NA	NA	NA	NA	NA	NA	NA	NA	NA	NA	NA	NA	NA	NA	NA	NA	NA	NA	NA	NA	NA	NA	NA	NA	NA	NA	NA
R022	50150846	R022_30	female	55	non-Severe	2020-01-27	2020-02-18	2020-01-17	2020-02-15	20	30	NA	NA	NA	NA	NA	NA	NA	NA	NA	NA	NA	NA	NA	NA	NA	NA	NA	negative	negative	NA	NA	NA	NA	NA	NA	NA	NA	NA	NA	NA	NA	NA	NA	NA	NA	NA	NA	NA
R022	50150846	R022_32	female	55	non-Severe	2020-01-27	2020-02-18	2020-01-17	2020-02-17	22	32	NA	NA	NA	NA	NA	NA	NA	NA	NA	NA	NA	NA	NA	NA	NA	NA	negative	NA	NA	NA	NA	NA	NA	NA	NA	NA	NA	NA	NA	NA	NA	NA	NA	NA	NA	NA	NA	NA
R022	50150846	R022_33	female	55	non-Severe	2020-01-27	2020-02-18	2020-01-17	2020-02-18	23	33	NA	NA	NA	NA	NA	NA	NA	NA	NA	NA	NA	NA	NA	NA	NA	NA	NA	NA	NA	NA	NA	NA	NA	NA	NA	NA	NA	NA	NA	NA	NA	NA	NA	NA	NA	NA	NA	NA
R023	50150847	R023_10	male	41	non-Severe	2020-01-27	2020-02-08	2020-01-21	2020-01-30	4	10	NA	NA	NA	NA	NA	NA	NA	NA	NA	NA	NA	NA	NA	NA	NA	NA	NA	NA	negative	NA	NA	NA	NA	NA	NA	NA	NA	NA	NA	NA	NA	NA	NA	NA	NA	NA	NA	NA
R023	50150847	R023_11	male	41	non-Severe	2020-01-27	2020-02-08	2020-01-21	2020-01-31	5	11	NA	NA	NA	NA	NA	NA	NA	NA	NA	NA	NA	NA	NA	NA	NA	NA	NA	NA	NA	NA	NA	NA	NA	NA	NA	NA	NA	NA	NA	NA	NA	NA	NA	NA	NA	NA	NA	NA
R023	50150847	R023_12	male	41	non-Severe	2020-01-27	2020-02-08	2020-01-21	2020-02-01	6	12	1	Yes	No	Yes	5	NA	NA	NA	NA	NA	NA	NA	NA	NA	NA	NA	negative	negative	NA	NA	NA	NA	NA	NA	NA	NA	NA	NA	NA	NA	NA	NA	NA	NA	NA	NA	NA	NA
R023	50150847	R023_14	male	41	non-Severe	2020-01-27	2020-02-08	2020-01-21	2020-02-03	8	14	NA	NA	NA	NA	NA	NA	NA	NA	NA	NA	NA	NA	NA	NA	NA	NA	NA	NA	negative	NA	NA	NA	NA	NA	NA	NA	NA	NA	NA	NA	NA	NA	NA	NA	NA	NA	NA	NA
R023	50150847	R023_15	male	41	non-Severe	2020-01-27	2020-02-08	2020-01-21	2020-02-04	9	15	NA	NA	NA	NA	NA	NA	NA	NA	NA	NA	NA	NA	NA	NA	NA	NA	NA	NA	NA	82	102	38.6	4.71	279	NA	NA	NA	NA	NA	NA	NA	NA	NA	NA	NA	NA	NA	NA
R023	50150847	R023_16	male	41	non-Severe	2020-01-27	2020-02-08	2020-01-21	2020-02-05	10	16	NA	NA	NA	NA	NA	NA	NA	NA	NA	NA	NA	NA	NA	NA	NA	NA	NA	positive	NA	NA	NA	NA	NA	NA	NA	NA	NA	NA	NA	NA	NA	NA	NA	NA	NA	NA	NA	NA
R023	50150847	R023_18	male	41	non-Severe	2020-01-27	2020-02-08	2020-01-21	2020-02-07	12	18	NA	NA	NA	NA	NA	NA	NA	NA	NA	NA	NA	NA	NA	NA	NA	NA	NA	NA	NA	NA	NA	NA	NA	NA	NA	NA	NA	NA	NA	NA	NA	NA	NA	NA	NA	NA	NA	NA
R023	50150847	R023_7	male	41	non-Severe	2020-01-27	2020-02-08	2020-01-21	2020-01-27	1	7	NA	NA	NA	NA	NA	NA	NA	NA	NA	NA	NA	NA	NA	NA	NA	NA	NA	NA	NA	77	107	30	4.81	246	6	1.015	negative	negative	negative	negative	negative	negative	negative	negative	negative	0	4	22
R023	50150847	R023_8	male	41	non-Severe	2020-01-27	2020-02-08	2020-01-21	2020/1/28	2	8	1	Yes	No	No	2	NA	NA	NA	NA	NA	NA	NA	NA	NA	NA	NA	positive	NA	negative	NA	NA	NA	NA	NA	NA	NA	NA	NA	NA	NA	NA	NA	NA	NA	NA	NA	NA	NA
R024	50150851	R024_137	female	61	non-Severe	2020-01-27	2020-02-16	2020-01-14	2020-05-29	124	137	NA	NA	NA	NA	NA	NA	NA	NA	NA	NA	NA	NA	NA	NA	NA	NA	negative	NA	NA	62.5	92	NA	4.715	294	5.5	1.025	negative	negative	negative	negative	negative	negative	+-	negative	negative	0	2	12
R024	50150851	R024_14	female	61	non-Severe	2020-01-27	2020-02-16	2020-01-14	2020-01-27	1	14	NA	NA	NA	NA	NA	NA	NA	NA	NA	NA	NA	NA	NA	NA	NA	NA	NA	NA	NA	64	90	38.9	3.44	243	NA	NA	NA	NA	NA	NA	NA	NA	NA	NA	NA	NA	NA	NA
R024	50150851	R024_15	female	61	non-Severe	2020-01-27	2020-02-16	2020-01-14	2020-01-28	2	15	5	Yes	No	No	6	NA	NA	NA	NA	NA	NA	NA	NA	NA	NA	NA	NA	NA	NA	NA	NA	NA	NA	NA	5	1.015	negative	negative	negative	negative	negative	negative	negative	negative	negative	0	2	9
R024	50150851	R024_17	female	61	non-Severe	2020-01-27	2020-02-16	2020-01-14	2020-01-30	4	17	NA	NA	NA	NA	NA	NA	NA	NA	NA	NA	NA	NA	NA	NA	NA	NA	NA	NA	positive	NA	NA	NA	NA	NA	NA	NA	NA	NA	NA	NA	NA	NA	NA	NA	NA	NA	NA	NA
R024	50150851	R024_18	female	61	non-Severe	2020-01-27	2020-02-16	2020-01-14	2020-01-31	5	18	NA	NA	NA	NA	NA	NA	NA	NA	NA	NA	NA	NA	NA	NA	NA	NA	NA	NA	NA	NA	NA	NA	NA	NA	NA	NA	NA	NA	NA	NA	NA	NA	NA	NA	NA	NA	NA	NA
R024	50150851	R024_22	female	61	non-Severe	2020-01-27	2020-02-16	2020-01-14	2020-02-04	9	22	5	Yes	No	Yes	9	NA	NA	NA	NA	NA	NA	NA	NA	NA	NA	NA	NA	NA	positive	NA	NA	NA	NA	NA	NA	NA	NA	NA	NA	NA	NA	NA	NA	NA	NA	NA	NA	NA
R024	50150851	R024_24	female	61	non-Severe	2020-01-27	2020-02-16	2020-01-14	2020-02-06	11	24	NA	NA	NA	NA	NA	NA	NA	NA	NA	NA	NA	NA	NA	NA	NA	NA	NA	NA	NA	76	73	40.1	2.77	348	NA	NA	NA	NA	NA	NA	NA	NA	NA	NA	NA	NA	NA	NA
R024	50150851	R024_25	female	61	non-Severe	2020-01-27	2020-02-16	2020-01-14	2020-02-07	12	25	NA	NA	NA	NA	NA	NA	NA	NA	NA	NA	NA	NA	NA	NA	NA	NA	NA	positive	NA	NA	NA	NA	NA	NA	NA	NA	NA	NA	NA	NA	NA	NA	NA	NA	NA	NA	NA	NA
R024	50150851	R024_26	female	61	non-Severe	2020-01-27	2020-02-16	2020-01-14	2020-02-08	13	26	NA	NA	NA	NA	NA	NA	NA	NA	NA	NA	NA	NA	NA	NA	NA	NA	NA	NA	negative	NA	NA	NA	NA	NA	NA	NA	NA	NA	NA	NA	NA	NA	NA	NA	NA	NA	NA	NA
R024	50150851	R024_27	female	61	non-Severe	2020-01-27	2020-02-16	2020-01-14	2020-02-09	14	27	NA	NA	NA	NA	NA	NA	NA	NA	NA	NA	NA	NA	NA	NA	NA	NA	NA	NA	negative	NA	NA	NA	NA	NA	NA	NA	NA	NA	NA	NA	NA	NA	NA	NA	NA	NA	NA	NA
R024	50150851	R024_29	female	61	non-Severe	2020-01-27	2020-02-16	2020-01-14	2020-02-11	16	29	NA	NA	NA	NA	NA	NA	NA	NA	NA	NA	NA	NA	NA	NA	NA	NA	NA	positive	NA	NA	NA	NA	NA	NA	NA	NA	NA	NA	NA	NA	NA	NA	NA	NA	NA	NA	NA	NA
R024	50150851	R024_31	female	61	non-Severe	2020-01-27	2020-02-16	2020-01-14	2020-02-13	18	31	NA	NA	NA	NA	NA	NA	NA	NA	NA	NA	NA	NA	NA	NA	NA	NA	NA	NA	NA	NA	NA	NA	NA	NA	NA	NA	NA	NA	NA	NA	NA	NA	NA	NA	NA	NA	NA	NA
R024	50150851	R024_32	female	61	non-Severe	2020-01-27	2020-02-16	2020-01-14	2020-02-14	19	32	4	Yes	No	No	5	NA	NA	NA	NA	NA	NA	NA	NA	NA	NA	NA	NA	NA	negative	NA	NA	NA	NA	NA	NA	NA	NA	NA	NA	NA	NA	NA	NA	NA	NA	NA	NA	NA
R024	50150851	R024_33	female	61	non-Severe	2020-01-27	2020-02-16	2020-01-14	2020-02-15	20	33	NA	NA	NA	NA	NA	NA	NA	NA	NA	NA	NA	NA	NA	NA	NA	NA	NA	NA	negative	NA	NA	NA	NA	NA	NA	NA	NA	NA	NA	NA	NA	NA	NA	NA	NA	NA	NA	NA
R024	50150851	R024_48	female	61	non-Severe	2020-01-27	2020-02-16	2020-01-14	2020-03-01	35	48	NA	NA	NA	NA	NA	NA	NA	NA	NA	NA	NA	NA	NA	NA	NA	NA	negative	negative	NA	NA	NA	NA	NA	NA	6.5	1.015	negative	negative	negative	negative	negative	negative	1+	negative	negative	NA	10	50
R024	50150851	R024_62	female	61	non-Severe	2020-01-27	2020-02-16	2020-01-14	2020-03-15	49	62	NA	NA	NA	NA	NA	NA	NA	NA	NA	NA	NA	NA	NA	NA	NA	NA	negative	negative	NA	73	77	NA	2.98	347	6	1.015	negative	negative	negative	negative	negative	negative	negative	negative	negative	0	1	3
R024	50150851	R024_63	female	61	non-Severe	2020-01-27	2020-02-16	2020-01-14	2020-03-16	50	63	NA	NA	NA	NA	NA	NA	NA	NA	NA	NA	NA	NA	NA	NA	NA	NA	negative	negative	NA	NA	NA	NA	NA	NA	NA	NA	NA	NA	NA	NA	NA	NA	NA	NA	NA	NA	NA	NA
R025	50150854	R025_10	female	39	non-Severe	2020-01-27	2020-02-03	2020-01-21	2020-01-30	4	10	NA	NA	NA	NA	NA	NA	NA	NA	NA	NA	NA	NA	NA	NA	NA	NA	NA	NA	negative	NA	NA	NA	NA	NA	5.5	1.03	negative	negative	negative	negative	negative	negative	negative	negative	negative	0	7	37
R025	50150854	R025_11	female	39	non-Severe	2020-01-27	2020-02-03	2020-01-21	2020-01-31	5	11	3	Yes	No	Yes	7	NA	NA	NA	NA	NA	NA	NA	NA	NA	NA	NA	NA	NA	NA	NA	NA	NA	NA	NA	NA	NA	NA	NA	NA	NA	NA	NA	NA	NA	NA	NA	NA	NA
R025	50150854	R025_12	female	39	non-Severe	2020-01-27	2020-02-03	2020-01-21	2020-02-01	6	12	NA	NA	NA	NA	NA	NA	NA	NA	NA	NA	NA	NA	NA	NA	NA	NA	NA	NA	negative	NA	NA	NA	NA	NA	NA	NA	NA	NA	NA	NA	NA	NA	NA	NA	NA	NA	NA	NA
R025	50150854	R025_13	female	39	non-Severe	2020-01-27	2020-02-03	2020-01-21	2020-02-02	7	13	NA	NA	NA	NA	NA	NA	NA	NA	NA	NA	NA	NA	NA	NA	NA	NA	NA	NA	NA	61	110	29.5	4.52	219	NA	NA	NA	NA	NA	NA	NA	NA	NA	NA	NA	NA	NA	NA
R025	50150854	R025_173	female	39	non-Severe	2020-01-27	2020-02-03	2020-01-21	2020-07-11	167	173	NA	NA	NA	NA	NA	NA	NA	NA	NA	NA	NA	NA	NA	NA	NA	NA	negative	NA	NA	NA	NA	NA	NA	NA	NA	NA	NA	NA	NA	NA	NA	NA	NA	NA	NA	NA	NA	NA
R025	50150854	R025_28	female	39	non-Severe	2020-01-27	2020-02-03	2020-01-21	2020-02-17	22	28	NA	NA	NA	NA	NA	NA	NA	NA	NA	NA	NA	NA	NA	NA	NA	NA	NA	negative	NA	54	115	42.3	4.17	202	NA	NA	NA	NA	NA	NA	NA	NA	NA	NA	NA	NA	NA	NA
R025	50150854	R025_385	female	39	non-Severe	2020-01-27	2020-02-03	2020-01-21	2021-02-08	379	385	1	No	No	Yes	4	NA	NA	NA	NA	NA	NA	NA	NA	NA	NA	NA	NA	NA	negative	43	123	44.1	5.72	236	5.5	1.018	NA	negative	NA	negative	negative	negative	negative	negative	negative	NA	NA	0
R025	50150854	R025_42	female	39	non-Severe	2020-01-27	2020-02-03	2020-01-21	2020-03-02	36	42	NA	NA	NA	NA	NA	NA	NA	NA	NA	NA	NA	NA	NA	NA	NA	NA	negative	negative	NA	57	112	39.4	5.12	281	6	1.02	negative	negative	negative	negative	negative	negative	negative	negative	negative	0	1	5
R025	50150854	R025_7	female	39	non-Severe	2020-01-27	2020-02-03	2020-01-21	2020-01-27	1	7	NA	NA	NA	NA	NA	NA	NA	NA	NA	NA	NA	NA	NA	NA	NA	NA	NA	NA	NA	64	120	31.4	3.62	221	NA	NA	NA	NA	NA	NA	NA	NA	NA	NA	NA	NA	NA	NA
R025	50150854	R025_8	female	39	non-Severe	2020-01-27	2020-02-03	2020-01-21	2020-01-28	2	8	NA	NA	NA	NA	NA	NA	NA	NA	NA	NA	NA	NA	NA	NA	NA	NA	NA	NA	NA	NA	NA	NA	NA	NA	6	1.02	negative	negative	negative	negative	negative	negative	+-	1+	negative	0	15	82
R025	50150854	R025_9	female	39	non-Severe	2020-01-27	2020-02-03	2020-01-21	2020-01-29	3	9	NA	NA	NA	NA	NA	NA	NA	NA	NA	NA	NA	NA	NA	NA	NA	NA	NA	NA	NA	NA	NA	NA	NA	NA	NA	NA	NA	NA	NA	NA	NA	NA	NA	NA	NA	NA	NA	NA
R025	50150854	R025_96	female	39	non-Severe	2020-01-27	2020-02-03	2020-01-21	2020-04-25	90	96	NA	NA	NA	NA	NA	NA	NA	NA	NA	NA	NA	NA	NA	NA	NA	NA	NA	NA	negative	NA	NA	NA	NA	NA	NA	NA	NA	NA	NA	NA	NA	NA	NA	NA	NA	NA	NA	NA
R026	50150855	R026_10	male	39	non-Severe	2020-01-27	2020-02-03	2020-01-19	2020-01-28	2	10	NA	NA	NA	NA	NA	NA	NA	NA	NA	NA	NA	NA	NA	NA	NA	NA	NA	NA	NA	NA	NA	NA	NA	NA	6.5	1.015	+-	negative	negative	negative	negative	negative	negative	negative	negative	0	6	34
R026	50150855	R026_12	male	39	non-Severe	2020-01-27	2020-02-03	2020-01-19	2020-01-30	4	12	NA	NA	NA	NA	NA	NA	NA	NA	NA	NA	NA	NA	NA	NA	NA	NA	NA	NA	negative	NA	NA	NA	NA	NA	NA	NA	NA	NA	NA	NA	NA	NA	NA	NA	NA	NA	NA	NA
R026	50150855	R026_13	male	39	non-Severe	2020-01-27	2020-02-03	2020-01-19	2020-01-31	5	13	4	Yes	No	Yes	8	NA	NA	NA	NA	NA	NA	NA	NA	NA	NA	NA	NA	NA	NA	NA	NA	NA	NA	NA	NA	NA	NA	NA	NA	NA	NA	NA	NA	NA	NA	NA	NA	NA
R026	50150855	R026_14	male	39	non-Severe	2020-01-27	2020-02-03	2020-01-19	2020-02-01	6	14	NA	NA	NA	NA	NA	NA	NA	NA	NA	NA	NA	NA	NA	NA	NA	NA	NA	NA	negative	NA	NA	NA	NA	NA	NA	NA	NA	NA	NA	NA	NA	NA	NA	NA	NA	NA	NA	NA
R026	50150855	R026_15	male	39	non-Severe	2020-01-27	2020-02-03	2020-01-19	2020-02-02	7	15	NA	NA	NA	NA	NA	NA	NA	NA	NA	NA	NA	NA	NA	NA	NA	NA	NA	NA	NA	79	108	32.4	4.97	238	NA	NA	NA	NA	NA	NA	NA	NA	NA	NA	NA	NA	NA	NA
R026	50150855	R026_175	male	39	non-Severe	2020-01-27	2020-02-03	2020-01-19	2020-07-11	167	175	NA	NA	NA	NA	NA	NA	NA	NA	NA	NA	NA	NA	NA	NA	NA	NA	negative	NA	NA	NA	NA	NA	NA	NA	NA	NA	NA	NA	NA	NA	NA	NA	NA	NA	NA	NA	NA	NA
R026	50150855	R026_178	male	39	non-Severe	2020-01-27	2020-02-03	2020-01-19	2020-07-14	170	178	NA	NA	NA	NA	NA	NA	NA	NA	NA	NA	NA	NA	NA	NA	NA	NA	NA	NA	NA	80	107	40.7	5.15	353	5	1.03	negative	negative	+-	negative	negative	negative	negative	negative	negative	0	5	30
R026	50150855	R026_30	male	39	non-Severe	2020-01-27	2020-02-03	2020-01-19	2020-02-17	22	30	NA	NA	NA	NA	NA	NA	NA	NA	NA	NA	NA	NA	NA	NA	NA	NA	NA	negative	NA	80	107	45.9	4.37	278	NA	NA	NA	NA	NA	NA	NA	NA	NA	NA	NA	NA	NA	NA
R026	50150855	R026_387	male	39	non-Severe	2020-01-27	2020-02-03	2020-01-19	2021-02-08	379	387	0	No	No	No	0	NA	NA	NA	NA	NA	NA	NA	NA	NA	NA	NA	NA	NA	negative	73	110	47.7	5.47	282	5.5	1.028	NA	negative	NA	negative	negative	negative	negative	negative	negative	NA	NA	0
R026	50150855	R026_44	male	39	non-Severe	2020-01-27	2020-02-03	2020-01-19	2020-03-02	36	44	NA	NA	NA	NA	NA	NA	NA	NA	NA	NA	NA	NA	NA	NA	NA	NA	negative	negative	NA	82	103	44.7	5.92	285	6	1.015	negative	negative	negative	negative	negative	negative	negative	negative	negative	0	0	0
R026	50150855	R026_9	male	39	non-Severe	2020-01-27	2020-02-03	2020-01-19	2020-01-27	1	9	NA	NA	NA	NA	NA	NA	NA	NA	NA	NA	NA	NA	NA	NA	NA	NA	NA	NA	NA	78	124	30.8	4.3	191	NA	NA	NA	NA	NA	NA	NA	NA	NA	NA	NA	NA	NA	NA
R027	50150856	R027_12	male	46	non-Severe	2020-01-27	2020-02-05	2020-01-19	2020-01-30	4	12	NA	NA	NA	NA	NA	NA	NA	NA	NA	NA	NA	NA	NA	NA	NA	NA	NA	NA	negative	NA	NA	NA	NA	NA	NA	NA	NA	NA	NA	NA	NA	NA	NA	NA	NA	NA	NA	NA
R027	50150856	R027_13	male	46	non-Severe	2020-01-27	2020-02-05	2020-01-19	2020-01-31	5	13	1	Yes	No	No	2	NA	NA	NA	NA	NA	NA	NA	NA	NA	NA	NA	NA	NA	NA	NA	NA	NA	NA	NA	NA	NA	NA	NA	NA	NA	NA	NA	NA	NA	NA	NA	NA	NA
R027	50150856	R027_14	male	46	non-Severe	2020-01-27	2020-02-05	2020-01-19	2020-02-01	6	14	NA	NA	NA	NA	NA	NA	NA	NA	NA	NA	NA	NA	NA	NA	NA	NA	NA	NA	NA	179	38	NA	7.42	584	NA	NA	NA	NA	NA	NA	NA	NA	NA	NA	NA	NA	NA	NA
R027	50150856	R027_16	male	46	non-Severe	2020-01-27	2020-02-05	2020-01-19	2020-02-03	8	16	NA	NA	NA	NA	NA	NA	NA	NA	NA	NA	NA	NA	NA	NA	NA	NA	NA	NA	negative	NA	NA	NA	NA	NA	NA	NA	NA	NA	NA	NA	NA	NA	NA	NA	NA	NA	NA	NA
R027	50150856	R027_163	male	46	non-Severe	2020-01-27	2020-02-05	2020-01-19	2020-06-29	155	163	NA	NA	NA	NA	NA	NA	NA	NA	NA	NA	NA	NA	NA	NA	NA	NA	NA	NA	NA	161	43	NA	8.4	605	NA	NA	NA	NA	NA	NA	NA	NA	NA	NA	NA	NA	NA	NA
R027	50150856	R027_17	male	46	non-Severe	2020-01-27	2020-02-05	2020-01-19	2020-02-04	9	17	NA	NA	NA	NA	NA	NA	NA	NA	NA	NA	NA	NA	NA	NA	NA	NA	NA	NA	NA	163	43	46	5.94	565	NA	NA	NA	NA	NA	NA	NA	NA	NA	NA	NA	NA	NA	NA
R027	50150856	R027_32	male	46	non-Severe	2020-01-27	2020-02-05	2020-01-19	2020-02-19	24	32	NA	NA	NA	NA	NA	NA	NA	NA	NA	NA	NA	NA	NA	NA	NA	NA	NA	negative	negative	150	47	62.8	7	581	NA	NA	NA	NA	NA	NA	NA	NA	NA	NA	NA	NA	NA	NA
R027	50150856	R027_388	male	46	non-Severe	2020-01-27	2020-02-05	2020-01-19	2021-02-09	380	388	0	No	No	No	0	NA	NA	NA	NA	NA	NA	NA	NA	NA	NA	NA	negative	NA	NA	164	42	56	6.08	396	6	1.012	NA	negative	NA	negative	negative	negative	negative	negative	negative	NA	NA	1
R027	50150856	R027_46	male	46	non-Severe	2020-01-27	2020-02-05	2020-01-19	2020-03-04	38	46	NA	NA	NA	NA	NA	NA	NA	NA	NA	NA	NA	NA	NA	NA	NA	NA	negative	negative	NA	163	43	NA	8.34	561	5.5	1.02	negative	+-	1+	negative	negative	negative	negative	negative	negative	0	1	5
R027	50150856	R027_753	male	46	non-Severe	2020-01-27	2020-02-05	2020-01-19	2022-02-09	745	753	NA	NA	NA	NA	NA	NA	NA	NA	NA	NA	NA	NA	NA	NA	NA	NA	NA	NA	NA	194	34	53.8	9.35	596	6	1.011	negative	+-	2+	negative	negative	negative	negative	negative	negative	0	1	3
R027	50150856	R027_9	male	46	non-Severe	2020-01-27	2020-02-05	2020-01-19	2020-01-27	1	9	NA	NA	NA	NA	NA	NA	NA	NA	NA	NA	NA	NA	NA	NA	NA	NA	NA	NA	NA	175	47	47.1	8.61	363	5.5	1.015	3+	negative	+-	negative	negative	negative	negative	negative	negative	0	1	4
R028	50150857	R028_10	male	43	non-Severe	2020-01-27	2020-02-10	2020-01-21	2020-01-30	4	10	NA	NA	NA	NA	NA	NA	NA	NA	NA	NA	NA	NA	NA	NA	NA	NA	NA	NA	NA	NA	NA	NA	NA	NA	NA	NA	NA	NA	NA	NA	NA	NA	NA	NA	NA	NA	NA	NA
R028	50150857	R028_11	male	43	non-Severe	2020-01-27	2020-02-10	2020-01-21	2020-01-31	5	11	NA	NA	NA	NA	NA	NA	NA	NA	NA	NA	NA	NA	NA	NA	NA	NA	NA	NA	NA	NA	NA	NA	NA	NA	NA	NA	NA	NA	NA	NA	NA	NA	NA	NA	NA	NA	NA	NA
R028	50150857	R028_143	male	43	non-Severe	2020-01-27	2020-02-10	2020-01-21	2020-06-11	137	143	NA	NA	NA	NA	NA	NA	NA	NA	NA	NA	NA	NA	NA	NA	NA	NA	NA	NA	NA	94	85	NA	6.86	359	6	1.02	negative	negative	negative	negative	negative	negative	negative	negative	negative	0	1	3
R028	50150857	R028_15	male	43	non-Severe	2020-01-27	2020-02-10	2020-01-21	2020-02-04	9	15	NA	NA	NA	NA	NA	NA	NA	NA	NA	NA	NA	NA	NA	NA	NA	NA	NA	NA	negative	NA	NA	NA	NA	NA	NA	NA	NA	NA	NA	NA	NA	NA	NA	NA	NA	NA	NA	NA
R028	50150857	R028_151	male	43	non-Severe	2020-01-27	2020-02-10	2020-01-21	2020-06-19	145	151	NA	NA	NA	NA	NA	NA	NA	NA	NA	NA	NA	NA	NA	NA	NA	NA	NA	NA	NA	NA	NA	NA	NA	NA	NA	NA	NA	NA	NA	NA	NA	NA	NA	NA	NA	NA	NA	NA
R028	50150857	R028_17	male	43	non-Severe	2020-01-27	2020-02-10	2020-01-21	2020-02-06	11	17	3	Yes	No	Yes	7	NA	NA	NA	NA	NA	NA	NA	NA	NA	NA	NA	NA	NA	NA	97	82	53.3	5.32	355	NA	NA	NA	NA	NA	NA	NA	NA	NA	NA	NA	NA	NA	NA
R028	50150857	R028_18	male	43	non-Severe	2020-01-27	2020-02-10	2020-01-21	2020-02-07	12	18	NA	NA	NA	NA	NA	NA	NA	NA	NA	NA	NA	NA	NA	NA	NA	NA	NA	NA	negative	NA	NA	NA	NA	NA	NA	NA	NA	NA	NA	NA	NA	NA	NA	NA	NA	NA	NA	NA
R028	50150857	R028_19	male	43	non-Severe	2020-01-27	2020-02-10	2020-01-21	2020/2/8	13	19	2	Yes	No	Yes	6	NA	NA	NA	NA	NA	NA	NA	NA	NA	NA	NA	negative	negative	NA	NA	NA	NA	NA	NA	NA	NA	NA	NA	NA	NA	NA	NA	NA	NA	NA	NA	NA	NA
R028	50150857	R028_20	male	43	non-Severe	2020-01-27	2020-02-10	2020-01-21	2020-02-09	14	20	NA	NA	NA	NA	NA	NA	NA	NA	NA	NA	NA	NA	NA	NA	NA	NA	NA	negative	NA	NA	NA	NA	NA	NA	NA	NA	NA	NA	NA	NA	NA	NA	NA	NA	NA	NA	NA	NA
R028	50150857	R028_21	male	43	non-Severe	2020-01-27	2020-02-10	2020-01-21	2020-02-10	15	21	NA	NA	NA	NA	NA	NA	NA	NA	NA	NA	NA	NA	NA	NA	NA	NA	NA	NA	NA	NA	NA	NA	NA	NA	NA	NA	NA	NA	NA	NA	NA	NA	NA	NA	NA	NA	NA	NA
R028	50150857	R028_35	male	43	non-Severe	2020-01-27	2020-02-10	2020-01-21	2020-02-24	29	35	NA	NA	NA	NA	NA	NA	NA	NA	NA	NA	NA	NA	NA	NA	NA	NA	NA	negative	negative	87	94	NA	4.99	362	7	1.015	negative	negative	negative	negative	negative	negative	negative	negative	negative	NA	0	0
R028	50150857	R028_386	male	43	non-Severe	2020-01-27	2020-02-10	2020-01-21	2021-02-09	380	386	0	No	No	No	0	NA	NA	NA	NA	NA	NA	NA	NA	NA	NA	NA	negative	NA	negative	89	90	70	9.12	404	5	1.025	NA	negative	NA	negative	negative	1+	negative	negative	negative	NA	NA	0
R028	50150857	R028_49	male	43	non-Severe	2020-01-27	2020-02-10	2020-01-21	2020-03-09	43	49	NA	NA	NA	NA	NA	NA	NA	NA	NA	NA	NA	NA	NA	NA	NA	NA	NA	negative	negative	95	84	NA	6.51	413	5.5	1.025	negative	negative	negative	negative	negative	negative	negative	negative	negative	0	1	3
R028	50150857	R028_7	male	43	non-Severe	2020-01-27	2020-02-10	2020-01-21	2020-01-27	1	7	NA	NA	NA	NA	NA	NA	NA	NA	NA	NA	NA	NA	NA	NA	NA	NA	NA	NA	NA	92	103	32.5	3.85	254	NA	NA	NA	NA	NA	NA	NA	NA	NA	NA	NA	NA	NA	NA
R028	50150857	R028_751	male	43	non-Severe	2020-01-27	2020-02-10	2020-01-21	2022-02-09	745	751	NA	NA	NA	NA	NA	NA	NA	NA	NA	NA	NA	NA	NA	NA	NA	NA	NA	NA	NA	86	93	61.1	6.52	381	5.5	1.019	negative	negative	negative	negative	negative	negative	negative	negative	negative	0	0	1
R028	50150857	R028_8	male	43	non-Severe	2020-01-27	2020-02-10	2020-01-21	2020-01-28	2	8	3	Yes	No	Yes	7	NA	NA	NA	NA	NA	NA	NA	NA	NA	NA	NA	NA	NA	NA	NA	NA	NA	NA	NA	6	1.015	1+	negative	negative	negative	negative	negative	negative	negative	negative	0	2	11
R028	50150857	R028_9	male	43	non-Severe	2020-01-27	2020-02-10	2020-01-21	2020-01-29	3	9	NA	NA	NA	NA	NA	NA	NA	NA	NA	NA	NA	NA	NA	NA	NA	NA	NA	NA	NA	NA	NA	NA	NA	NA	NA	NA	NA	NA	NA	NA	NA	NA	NA	NA	NA	NA	NA	NA
R029	50150858	R029_13	male	54	non-Severe	2020-01-27	2020-02-22	2020-01-15	2020-01-27	1	13	NA	NA	NA	NA	NA	NA	NA	NA	NA	NA	NA	NA	NA	NA	NA	NA	NA	NA	NA	77	124	40.5	5.39	226	NA	NA	NA	NA	NA	NA	NA	NA	NA	NA	NA	NA	NA	NA
R029	50150858	R029_14	male	54	non-Severe	2020-01-27	2020-02-22	2020-01-15	2020-01-28	2	14	NA	NA	NA	NA	NA	NA	NA	NA	NA	NA	NA	NA	NA	NA	NA	NA	NA	NA	NA	NA	NA	NA	NA	NA	6	1.02	3+	negative	negative	negative	negative	negative	negative	negative	negative	0	4	22
R029	50150858	R029_149	male	54	non-Severe	2020-01-27	2020-02-22	2020-01-15	2020-06-11	137	149	NA	NA	NA	NA	NA	NA	NA	NA	NA	NA	NA	NA	NA	NA	NA	NA	NA	NA	NA	78	97	NA	4.75	479	5.5	1.025	negative	negative	negative	negative	negative	negative	negative	negative	negative	0	3	17
R029	50150858	R029_17	male	54	non-Severe	2020-01-27	2020-02-22	2020-01-15	2020-01-31	5	17	4	Yes	Yes	Yes	10	NA	NA	NA	NA	NA	NA	NA	NA	NA	NA	NA	NA	NA	NA	NA	NA	NA	NA	NA	NA	NA	NA	NA	NA	NA	NA	NA	NA	NA	NA	NA	NA	NA
R029	50150858	R029_20	male	54	non-Severe	2020-01-27	2020-02-22	2020-01-15	2020-02-03	8	20	NA	NA	NA	NA	NA	NA	NA	NA	NA	NA	NA	NA	NA	NA	NA	NA	NA	NA	negative	NA	NA	NA	NA	NA	NA	NA	NA	NA	NA	NA	NA	NA	NA	NA	NA	NA	NA	NA
R029	50150858	R029_22	male	54	non-Severe	2020-01-27	2020-02-22	2020-01-15	2020-02-05	10	22	NA	NA	NA	NA	NA	NA	NA	NA	NA	NA	NA	NA	NA	NA	NA	NA	NA	negative	NA	NA	NA	NA	NA	NA	NA	NA	NA	NA	NA	NA	NA	NA	NA	NA	NA	NA	NA	NA
R029	50150858	R029_23	male	54	non-Severe	2020-01-27	2020-02-22	2020-01-15	2020-02-06	11	23	NA	NA	NA	NA	NA	NA	NA	NA	NA	NA	NA	NA	NA	NA	NA	NA	NA	NA	negative	80	96	65.1	7.8	331	NA	NA	NA	NA	NA	NA	NA	NA	NA	NA	NA	NA	NA	NA
R029	50150858	R029_24	male	54	non-Severe	2020-01-27	2020-02-22	2020-01-15	2020-02-07	12	24	NA	NA	NA	NA	NA	NA	NA	NA	NA	NA	NA	NA	NA	NA	NA	NA	NA	NA	NA	NA	NA	NA	NA	NA	NA	NA	NA	NA	NA	NA	NA	NA	NA	NA	NA	NA	NA	NA
R029	50150858	R029_25	male	54	non-Severe	2020-01-27	2020-02-22	2020-01-15	2020-02-08	13	25	NA	NA	NA	NA	NA	NA	NA	NA	NA	NA	NA	NA	NA	NA	NA	NA	NA	NA	negative	NA	NA	NA	NA	NA	NA	NA	NA	NA	NA	NA	NA	NA	NA	NA	NA	NA	NA	NA
R029	50150858	R029_27	male	54	non-Severe	2020-01-27	2020-02-22	2020-01-15	2020-02-10	15	27	NA	NA	NA	NA	NA	NA	NA	NA	NA	NA	NA	NA	NA	NA	NA	NA	NA	NA	NA	NA	NA	NA	NA	NA	NA	NA	NA	NA	NA	NA	NA	NA	NA	NA	NA	NA	NA	NA
R029	50150858	R029_28	male	54	non-Severe	2020-01-27	2020-02-22	2020-01-15	2020-02-11	16	28	5	Yes	No	Yes	9	NA	NA	NA	NA	NA	NA	NA	NA	NA	NA	NA	NA	NA	NA	NA	NA	NA	NA	NA	NA	NA	NA	NA	NA	NA	NA	NA	NA	NA	NA	NA	NA	NA
R029	50150858	R029_29	male	54	non-Severe	2020-01-27	2020-02-22	2020-01-15	2020-02-12	17	29	NA	NA	NA	NA	NA	NA	NA	NA	NA	NA	NA	NA	NA	NA	NA	NA	NA	NA	NA	75	99	39.3	2.94	299	NA	NA	NA	NA	NA	NA	NA	NA	NA	NA	NA	NA	NA	NA
R029	50150858	R029_30	male	54	non-Severe	2020-01-27	2020-02-22	2020-01-15	2020-02-13	18	30	NA	NA	NA	NA	NA	NA	NA	NA	NA	NA	NA	NA	NA	NA	NA	NA	NA	NA	negative	NA	NA	NA	NA	NA	NA	NA	NA	NA	NA	NA	NA	NA	NA	NA	NA	NA	NA	NA
R029	50150858	R029_32	male	54	non-Severe	2020-01-27	2020-02-22	2020-01-15	2020-02-15	20	32	NA	NA	NA	NA	NA	NA	NA	NA	NA	NA	NA	NA	NA	NA	NA	NA	NA	NA	negative	NA	NA	NA	NA	NA	NA	NA	NA	NA	NA	NA	NA	NA	NA	NA	NA	NA	NA	NA
R029	50150858	R029_34	male	54	non-Severe	2020-01-27	2020-02-22	2020-01-15	2020-02-17	22	34	NA	NA	NA	NA	NA	NA	NA	NA	NA	NA	NA	NA	NA	NA	NA	NA	negative	NA	negative	NA	NA	NA	NA	NA	NA	NA	NA	NA	NA	NA	NA	NA	NA	NA	NA	NA	NA	NA
R029	50150858	R029_35	male	54	non-Severe	2020-01-27	2020-02-22	2020-01-15	2020-02-18	23	35	NA	NA	NA	NA	NA	NA	NA	NA	NA	NA	NA	NA	NA	NA	NA	NA	NA	NA	NA	NA	NA	NA	NA	NA	NA	NA	NA	NA	NA	NA	NA	NA	NA	NA	NA	NA	NA	NA
R029	50150858	R029_36	male	54	non-Severe	2020-01-27	2020-02-22	2020-01-15	2020-02-19	24	36	3	Yes	No	Yes	7	NA	NA	NA	NA	NA	NA	NA	NA	NA	NA	NA	NA	negative	NA	NA	NA	NA	NA	NA	NA	NA	NA	NA	NA	NA	NA	NA	NA	NA	NA	NA	NA	NA
R029	50150858	R029_37	male	54	non-Severe	2020-01-27	2020-02-22	2020-01-15	2020-02-20	25	37	NA	NA	NA	NA	NA	NA	NA	NA	NA	NA	NA	NA	NA	NA	NA	NA	NA	NA	NA	74	99	NA	4.23	341	NA	NA	NA	NA	NA	NA	NA	NA	NA	NA	NA	NA	NA	NA
R029	50150858	R029_38	male	54	non-Severe	2020-01-27	2020-02-22	2020-01-15	2020-02-21	26	38	NA	NA	NA	NA	NA	NA	NA	NA	NA	NA	NA	NA	NA	NA	NA	NA	NA	negative	NA	NA	NA	NA	NA	NA	NA	NA	NA	NA	NA	NA	NA	NA	NA	NA	NA	NA	NA	NA
R029	50150858	R029_39	male	54	non-Severe	2020-01-27	2020-02-22	2020-01-15	2020-02-22	27	39	NA	NA	NA	NA	NA	NA	NA	NA	NA	NA	NA	NA	NA	NA	NA	NA	NA	NA	NA	NA	NA	NA	NA	NA	NA	NA	NA	NA	NA	NA	NA	NA	NA	NA	NA	NA	NA	NA
R029	50150858	R029_392	male	54	non-Severe	2020-01-27	2020-02-22	2020-01-15	2021-02-09	380	392	0	No	No	No	0	NA	NA	NA	NA	NA	NA	NA	NA	NA	NA	NA	negative	NA	NA	66	103	55.7	5.28	469	5.5	1.021	NA	negative	NA	negative	negative	negative	negative	negative	negative	NA	NA	0
R029	50150858	R029_53	male	54	non-Severe	2020-01-27	2020-02-22	2020-01-15	2020-03-07	41	53	NA	NA	NA	NA	NA	NA	NA	NA	NA	NA	NA	NA	NA	NA	NA	NA	negative	negative	NA	75	99	46.2	4.48	399	5.5	1.025	negative	negative	negative	negative	negative	negative	negative	negative	negative	0	2	9
R029	50150858	R029_54	male	54	non-Severe	2020-01-27	2020-02-22	2020-01-15	2020-03-08	42	54	NA	NA	NA	NA	NA	NA	NA	NA	NA	NA	NA	NA	NA	NA	NA	NA	NA	NA	NA	NA	NA	NA	NA	NA	NA	NA	NA	NA	NA	NA	NA	NA	NA	NA	NA	NA	NA	NA
R029	50150858	R029_69	male	54	non-Severe	2020-01-27	2020-02-22	2020-01-15	2020-03-23	57	69	NA	NA	NA	NA	NA	NA	NA	NA	NA	NA	NA	NA	NA	NA	NA	NA	negative	negative	NA	78	97	NA	4.14	442	5.5	1.025	negative	negative	negative	negative	negative	negative	negative	negative	negative	0	2	11
R029	50150858	R029_757	male	54	non-Severe	2020-01-27	2020-02-22	2020-01-15	2022-02-09	745	757	NA	NA	NA	NA	NA	NA	NA	NA	NA	NA	NA	NA	NA	NA	NA	NA	NA	NA	NA	76	96	49	5.56	487	5.5	1.019	negative	negative	negative	negative	negative	negative	negative	negative	negative	0	0	2
R030	50150859	R030_11	male	41	non-Severe	2020-01-27	2020-02-21	2020-01-17	2020-01-27	1	11	NA	NA	NA	NA	NA	NA	NA	NA	NA	NA	NA	NA	NA	NA	NA	NA	NA	NA	NA	91	104	30.6	5.11	239	NA	NA	NA	NA	NA	NA	NA	NA	NA	NA	NA	NA	NA	NA
R030	50150859	R030_112	male	41	non-Severe	2020-01-27	2020-02-21	2020-01-17	2020-05-07	102	112	NA	NA	NA	NA	NA	NA	NA	NA	NA	NA	NA	NA	NA	NA	NA	NA	NA	NA	NA	90	91	NA	3.39	473	6.5	1.02	negative	negative	negative	negative	negative	negative	+-	negative	negative	0	3	17
R030	50150859	R030_12	male	41	non-Severe	2020-01-27	2020-02-21	2020-01-17	2020-01-28	2	12	NA	NA	NA	NA	NA	NA	NA	NA	NA	NA	NA	NA	NA	NA	NA	NA	NA	NA	negative	NA	NA	NA	NA	NA	5.5	1.025	3+	negative	negative	negative	negative	negative	negative	negative	negative	0	6	31
R030	50150859	R030_14	male	41	non-Severe	2020-01-27	2020-02-21	2020-01-17	2020-01-30	4	14	NA	NA	NA	NA	NA	NA	NA	NA	NA	NA	NA	NA	NA	NA	NA	NA	NA	NA	negative	NA	NA	NA	NA	NA	NA	NA	NA	NA	NA	NA	NA	NA	NA	NA	NA	NA	NA	NA
R030	50150859	R030_15	male	41	non-Severe	2020-01-27	2020-02-21	2020-01-17	2020-01-31	5	15	4	Yes	No	Yes	8	NA	NA	NA	NA	NA	NA	NA	NA	NA	NA	NA	NA	NA	NA	NA	NA	NA	NA	NA	NA	NA	NA	NA	NA	NA	NA	NA	NA	NA	NA	NA	NA	NA
R030	50150859	R030_16	male	41	non-Severe	2020-01-27	2020-02-21	2020-01-17	2020-02-01	6	16	NA	NA	NA	NA	NA	NA	NA	NA	NA	NA	NA	NA	NA	NA	NA	NA	NA	NA	positive	NA	NA	NA	NA	NA	NA	NA	NA	NA	NA	NA	NA	NA	NA	NA	NA	NA	NA	NA
R030	50150859	R030_17	male	41	non-Severe	2020-01-27	2020-02-21	2020-01-17	2020-02-02	7	17	NA	NA	NA	NA	NA	NA	NA	NA	NA	NA	NA	NA	NA	NA	NA	NA	NA	NA	NA	90	91	31.6	3.97	397	NA	NA	NA	NA	NA	NA	NA	NA	NA	NA	NA	NA	NA	NA
R030	50150859	R030_18	male	41	non-Severe	2020-01-27	2020-02-21	2020-01-17	2020-02-03	8	18	NA	NA	NA	NA	NA	NA	NA	NA	NA	NA	NA	NA	NA	NA	NA	NA	NA	negative	NA	NA	NA	NA	NA	NA	NA	NA	NA	NA	NA	NA	NA	NA	NA	NA	NA	NA	NA	NA
R030	50150859	R030_20	male	41	non-Severe	2020-01-27	2020-02-21	2020-01-17	2020-02-05	10	20	5	Yes	No	Yes	9	NA	NA	NA	NA	NA	NA	NA	NA	NA	NA	NA	NA	negative	NA	NA	NA	NA	NA	NA	NA	NA	NA	NA	NA	NA	NA	NA	NA	NA	NA	NA	NA	NA
R030	50150859	R030_22	male	41	non-Severe	2020-01-27	2020-02-21	2020-01-17	2020-02-07	12	22	NA	NA	NA	NA	NA	NA	NA	NA	NA	NA	NA	NA	NA	NA	NA	NA	NA	NA	negative	NA	NA	NA	NA	NA	NA	NA	NA	NA	NA	NA	NA	NA	NA	NA	NA	NA	NA	NA
R030	50150859	R030_25	male	41	non-Severe	2020-01-27	2020-02-21	2020-01-17	2020-02-10	15	25	NA	NA	NA	NA	NA	NA	NA	NA	NA	NA	NA	NA	NA	NA	NA	NA	NA	negative	negative	NA	NA	NA	NA	NA	NA	NA	NA	NA	NA	NA	NA	NA	NA	NA	NA	NA	NA	NA
R030	50150859	R030_26	male	41	non-Severe	2020-01-27	2020-02-21	2020-01-17	2020-02-11	16	26	NA	NA	NA	NA	NA	NA	NA	NA	NA	NA	NA	NA	NA	NA	NA	NA	NA	NA	negative	NA	NA	NA	NA	NA	NA	NA	NA	NA	NA	NA	NA	NA	NA	NA	NA	NA	NA	NA
R030	50150859	R030_29	male	41	non-Severe	2020-01-27	2020-02-21	2020-01-17	2020-02-14	19	29	NA	NA	NA	NA	NA	NA	NA	NA	NA	NA	NA	NA	NA	NA	NA	NA	NA	NA	NA	82	102	33.4	3.27	419	NA	NA	NA	NA	NA	NA	NA	NA	NA	NA	NA	NA	NA	NA
R030	50150859	R030_30	male	41	non-Severe	2020-01-27	2020-02-21	2020-01-17	2020-02-15	20	30	NA	NA	NA	NA	NA	NA	NA	NA	NA	NA	NA	NA	NA	NA	NA	NA	NA	NA	negative	NA	NA	NA	NA	NA	NA	NA	NA	NA	NA	NA	NA	NA	NA	NA	NA	NA	NA	NA
R030	50150859	R030_31	male	41	non-Severe	2020-01-27	2020-02-21	2020-01-17	2020-02-16	21	31	5	Yes	No	No	6	NA	NA	NA	NA	NA	NA	NA	NA	NA	NA	NA	negative	NA	NA	NA	NA	NA	NA	NA	NA	NA	NA	NA	NA	NA	NA	NA	NA	NA	NA	NA	NA	NA
R030	50150859	R030_32	male	41	non-Severe	2020-01-27	2020-02-21	2020-01-17	2020-02-17	22	32	NA	NA	NA	NA	NA	NA	NA	NA	NA	NA	NA	NA	NA	NA	NA	NA	negative	NA	NA	NA	NA	NA	NA	NA	NA	NA	NA	NA	NA	NA	NA	NA	NA	NA	NA	NA	NA	NA
R030	50150859	R030_35	male	41	non-Severe	2020-01-27	2020-02-21	2020-01-17	2020-02-20	25	35	NA	NA	NA	NA	NA	NA	NA	NA	NA	NA	NA	NA	NA	NA	NA	NA	NA	negative	NA	NA	NA	NA	NA	NA	NA	NA	NA	NA	NA	NA	NA	NA	NA	NA	NA	NA	NA	NA
R030	50150859	R030_36	male	41	non-Severe	2020-01-27	2020-02-21	2020-01-17	2020-02-21	26	36	NA	NA	NA	NA	NA	NA	NA	NA	NA	NA	NA	NA	NA	NA	NA	NA	NA	NA	NA	NA	NA	NA	NA	NA	NA	NA	NA	NA	NA	NA	NA	NA	NA	NA	NA	NA	NA	NA
R030	50150859	R030_390	male	41	non-Severe	2020-01-27	2020-02-21	2020-01-17	2021-02-09	380	390	1	Yes	No	No	2	NA	NA	NA	NA	NA	NA	NA	NA	NA	NA	NA	negative	NA	NA	69	111	52.8	3.56	455	5.5	1.019	NA	negative	NA	negative	negative	negative	negative	negative	negative	NA	NA	0
R030	50150859	R030_64	male	41	non-Severe	2020-01-27	2020-02-21	2020-01-17	2020-03-20	54	64	NA	NA	NA	NA	NA	NA	NA	NA	NA	NA	NA	NA	NA	NA	NA	NA	negative	NA	NA	82	102	NA	3.54	530	6.5	1.02	negative	negative	negative	negative	negative	negative	negative	negative	negative	0	2	9
R030	50150859	R030_756	male	41	non-Severe	2020-01-27	2020-02-21	2020-01-17	2022-02-10	746	756	2	Yes	No	No	3	NA	NA	NA	NA	NA	NA	NA	NA	NA	NA	NA	NA	NA	NA	83	98	44	3.36	463	5.5	1.021	negative	negative	negative	negative	negative	negative	negative	negative	negative	0	0	2
R031	50150861	R031_10	female	20	non-Severe	2020-01-27	2020-02-03	2020-01-19	2020-01-28	2	10	NA	NA	NA	NA	NA	NA	NA	NA	NA	NA	NA	NA	NA	NA	NA	NA	NA	NA	NA	NA	NA	NA	NA	NA	5	1.03	negative	negative	negative	negative	negative	negative	negative	negative	negative	0	3	14
R031	50150861	R031_12	female	20	non-Severe	2020-01-27	2020-02-03	2020-01-19	2020-01-30	4	12	NA	NA	NA	NA	NA	NA	NA	NA	NA	NA	NA	NA	NA	NA	NA	NA	NA	NA	negative	NA	NA	NA	NA	NA	NA	NA	NA	NA	NA	NA	NA	NA	NA	NA	NA	NA	NA	NA
R031	50150861	R031_13	female	20	non-Severe	2020-01-27	2020-02-03	2020-01-19	2020/1/31	5	13	0	No	No	No	0	NA	NA	NA	NA	NA	NA	NA	NA	NA	NA	NA	negative	negative	NA	NA	NA	NA	NA	NA	NA	NA	NA	NA	NA	NA	NA	NA	NA	NA	NA	NA	NA	NA
R031	50150861	R031_14	female	20	non-Severe	2020-01-27	2020-02-03	2020-01-19	2020-02-01	6	14	NA	NA	NA	NA	NA	NA	NA	NA	NA	NA	NA	NA	NA	NA	NA	NA	NA	NA	negative	NA	NA	NA	NA	NA	NA	NA	NA	NA	NA	NA	NA	NA	NA	NA	NA	NA	NA	NA
R031	50150861	R031_15	female	20	non-Severe	2020-01-27	2020-02-03	2020-01-19	2020-02-02	7	15	NA	NA	NA	NA	NA	NA	NA	NA	NA	NA	NA	NA	NA	NA	NA	NA	NA	NA	NA	68	112	27.7	3.39	272	NA	NA	NA	NA	NA	NA	NA	NA	NA	NA	NA	NA	NA	NA
R031	50150861	R031_30	female	20	non-Severe	2020-01-27	2020-02-03	2020-01-19	2020-02-17	22	30	NA	NA	NA	NA	NA	NA	NA	NA	NA	NA	NA	NA	NA	NA	NA	NA	NA	NA	negative	65	118	41.8	3.18	349	NA	NA	NA	NA	NA	NA	NA	NA	NA	NA	NA	NA	NA	NA
R031	50150861	R031_31	female	20	non-Severe	2020-01-27	2020-02-03	2020-01-19	2020-02-18	23	31	NA	NA	NA	NA	NA	NA	NA	NA	NA	NA	NA	NA	NA	NA	NA	NA	NA	positive	NA	NA	NA	NA	NA	NA	NA	NA	NA	NA	NA	NA	NA	NA	NA	NA	NA	NA	NA	NA
R031	50150861	R031_387	female	20	non-Severe	2020-01-27	2020-02-03	2020-01-19	2021/2/8	379	387	0	No	No	No	0	NA	NA	NA	NA	NA	NA	NA	NA	NA	NA	NA	negative	negative	NA	NA	NA	NA	NA	NA	NA	NA	NA	NA	NA	NA	NA	NA	NA	NA	NA	NA	NA	NA
R031	50150861	R031_388	female	20	non-Severe	2020-01-27	2020-02-03	2020-01-19	2021-02-09	380	388	NA	NA	NA	NA	NA	NA	NA	NA	NA	NA	NA	NA	NA	NA	NA	NA	NA	NA	negative	52	132	38.6	3.68	309	5.5	1.029	NA	negative	NA	negative	negative	negative	1+	negative	negative	NA	NA	5
R031	50150861	R031_754	female	20	non-Severe	2020-01-27	2020-02-03	2020-01-19	2022-02-10	746	754	NA	NA	NA	NA	NA	NA	NA	NA	NA	NA	NA	NA	NA	NA	NA	NA	NA	NA	NA	56	127	36.8	3.31	295	6	1.027	negative	negative	negative	negative	negative	negative	negative	negative	negative	0	1	3
R031	50150861	R031_9	female	20	non-Severe	2020-01-27	2020-02-03	2020-01-19	2020-01-27	1	9	NA	NA	NA	NA	NA	NA	NA	NA	NA	NA	NA	NA	NA	NA	NA	NA	NA	NA	NA	78	95	32.6	5.49	326	NA	NA	NA	NA	NA	NA	NA	NA	NA	NA	NA	NA	NA	NA
R032	50150887	R032_10	male	34	Severe	2020-01-28	2020-03-05	2020-01-25	2020-02-03	7	10	NA	NA	NA	NA	NA	NA	NA	NA	NA	NA	NA	NA	NA	NA	NA	NA	NA	NA	positive	NA	NA	NA	NA	NA	NA	NA	NA	NA	NA	NA	NA	NA	NA	NA	NA	NA	NA	NA
R032	50150887	R032_14	male	34	Severe	2020-01-28	2020-03-05	2020-01-25	2020-02-07	11	14	NA	NA	NA	NA	NA	NA	NA	NA	NA	NA	NA	NA	NA	NA	NA	NA	NA	NA	positive	NA	NA	NA	NA	NA	NA	NA	NA	NA	NA	NA	NA	NA	NA	NA	NA	NA	NA	NA
R032	50150887	R032_15	male	34	Severe	2020-01-28	2020-03-05	2020-01-25	2020-02-08	12	15	NA	NA	NA	NA	NA	NA	NA	NA	NA	NA	NA	NA	NA	NA	NA	NA	NA	NA	NA	95	90	NA	3.14	372	NA	NA	NA	NA	NA	NA	NA	NA	NA	NA	NA	NA	NA	NA
R032	50150887	R032_18	male	34	Severe	2020-01-28	2020-03-05	2020-01-25	2020-02-11	15	18	NA	NA	NA	NA	NA	NA	NA	NA	NA	NA	NA	NA	NA	NA	NA	NA	NA	NA	positive	NA	NA	NA	NA	NA	NA	NA	NA	NA	NA	NA	NA	NA	NA	NA	NA	NA	NA	NA
R032	50150887	R032_20	male	34	Severe	2020-01-28	2020-03-05	2020-01-25	2020-02-13	17	20	NA	NA	NA	NA	NA	NA	NA	NA	NA	NA	NA	NA	NA	NA	NA	NA	NA	NA	NA	105	79	NA	4.3	420	NA	NA	NA	NA	NA	NA	NA	NA	NA	NA	NA	NA	NA	NA
R032	50150887	R032_21	male	34	Severe	2020-01-28	2020-03-05	2020-01-25	2020-02-14	18	21	NA	NA	NA	NA	NA	NA	NA	NA	NA	NA	NA	NA	NA	NA	NA	NA	NA	NA	positive	NA	NA	NA	NA	NA	NA	NA	NA	NA	NA	NA	NA	NA	NA	NA	NA	NA	NA	NA
R032	50150887	R032_25	male	34	Severe	2020-01-28	2020-03-05	2020-01-25	2020-02-18	22	25	NA	NA	NA	NA	NA	NA	NA	NA	NA	NA	NA	NA	NA	NA	NA	NA	positive	NA	NA	NA	NA	NA	NA	NA	NA	NA	NA	NA	NA	NA	NA	NA	NA	NA	NA	NA	NA	NA
R032	50150887	R032_259	male	34	Severe	2020-01-28	2020-03-05	2020-01-25	2020-10-09	256	259	NA	NA	NA	NA	NA	NA	NA	NA	NA	NA	NA	NA	NA	NA	NA	NA	NA	NA	negative	NA	NA	NA	NA	NA	NA	NA	NA	NA	NA	NA	NA	NA	NA	NA	NA	NA	NA	NA
R032	50150887	R032_26	male	34	Severe	2020-01-28	2020-03-05	2020-01-25	2020-02-19	23	26	NA	NA	NA	NA	NA	NA	NA	NA	NA	NA	NA	NA	NA	NA	NA	NA	NA	NA	NA	86	101	44.2	5.27	269	NA	NA	NA	NA	NA	NA	NA	NA	NA	NA	NA	NA	NA	NA
R032	50150887	R032_28	male	34	Severe	2020-01-28	2020-03-05	2020-01-25	2020-02-21	25	28	5	Yes	Yes	Yes	11	NA	NA	NA	NA	NA	NA	NA	NA	NA	NA	NA	NA	NA	NA	NA	NA	NA	NA	NA	NA	NA	NA	NA	NA	NA	NA	NA	NA	NA	NA	NA	NA	NA
R032	50150887	R032_29	male	34	Severe	2020-01-28	2020-03-05	2020-01-25	2020-02-22	26	29	NA	NA	NA	NA	NA	NA	NA	NA	NA	NA	NA	NA	NA	NA	NA	NA	negative	negative	NA	NA	NA	NA	NA	NA	NA	NA	NA	NA	NA	NA	NA	NA	NA	NA	NA	NA	NA	NA
R032	50150887	R032_30	male	34	Severe	2020-01-28	2020-03-05	2020-01-25	2020-02-23	27	30	NA	NA	NA	NA	NA	NA	NA	NA	NA	NA	NA	NA	NA	NA	NA	NA	positive	NA	NA	98	86	53.1	4.42	329	NA	NA	NA	NA	NA	NA	NA	NA	NA	NA	NA	NA	NA	NA
R032	50150887	R032_33	male	34	Severe	2020-01-28	2020-03-05	2020-01-25	2020-02-26	30	33	NA	NA	NA	NA	NA	NA	NA	NA	NA	NA	NA	NA	NA	NA	NA	NA	positive	negative	NA	NA	NA	NA	NA	NA	NA	NA	NA	NA	NA	NA	NA	NA	NA	NA	NA	NA	NA	NA
R032	50150887	R032_34	male	34	Severe	2020-01-28	2020-03-05	2020-01-25	2020-02-27	31	34	NA	NA	NA	NA	NA	NA	NA	NA	NA	NA	NA	NA	NA	NA	NA	NA	NA	NA	NA	103	81	52.6	5.44	400	NA	NA	NA	NA	NA	NA	NA	NA	NA	NA	NA	NA	NA	NA
R032	50150887	R032_36	male	34	Severe	2020-01-28	2020-03-05	2020-01-25	2020-02-29	33	36	NA	NA	NA	NA	NA	NA	NA	NA	NA	NA	NA	NA	NA	NA	NA	NA	negative	negative	NA	NA	NA	NA	NA	NA	NA	NA	NA	NA	NA	NA	NA	NA	NA	NA	NA	NA	NA	NA
R032	50150887	R032_368	male	34	Severe	2020-01-28	2020-03-05	2020-01-25	2021-01-26	365	368	1	No	No	Yes	4	NA	NA	NA	NA	NA	NA	NA	NA	NA	NA	NA	NA	NA	NA	NA	87	NA	NA	NA	NA	NA	NA	NA	NA	NA	NA	NA	NA	NA	NA	NA	NA	NA
R032	50150887	R032_37	male	34	Severe	2020-01-28	2020-03-05	2020-01-25	2020-03-01	34	37	NA	NA	NA	NA	NA	NA	NA	NA	NA	NA	NA	NA	NA	NA	NA	NA	negative	NA	NA	93	92	42.3	3.61	392	NA	NA	NA	NA	NA	NA	NA	NA	NA	NA	NA	NA	NA	NA
R032	50150887	R032_38	male	34	Severe	2020-01-28	2020-03-05	2020-01-25	2020-03-02	35	38	NA	NA	NA	NA	NA	NA	NA	NA	NA	NA	NA	NA	NA	NA	NA	NA	negative	NA	NA	NA	NA	NA	NA	NA	NA	NA	NA	NA	NA	NA	NA	NA	NA	NA	NA	NA	NA	NA
R032	50150887	R032_381	male	34	Severe	2020-01-28	2020-03-05	2020-01-25	2021-02-08	378	381	NA	NA	NA	NA	NA	NA	NA	NA	NA	NA	NA	NA	NA	NA	NA	NA	NA	NA	negative	NA	NA	NA	NA	NA	NA	NA	NA	NA	NA	NA	NA	NA	NA	NA	NA	NA	NA	NA
R032	50150887	R032_39	male	34	Severe	2020-01-28	2020-03-05	2020-01-25	2020-03-03	36	39	4	Yes	No	Yes	8	NA	NA	NA	NA	NA	NA	NA	NA	NA	NA	NA	negative	negative	NA	NA	NA	NA	NA	NA	NA	NA	NA	NA	NA	NA	NA	NA	NA	NA	NA	NA	NA	NA
R032	50150887	R032_4	male	34	Severe	2020-01-28	2020-03-05	2020-01-25	2020-01-28	1	4	NA	NA	NA	NA	NA	Yes	NA	Yes	NA	NA	Yes	NA	NA	NA	NA	NA	positive	NA	NA	103	81	16.9	3.79	338	6	1.02	negative	+-	+-	negative	negative	negative	negative	negative	negative	0	4	20
R032	50150887	R032_40	male	34	Severe	2020-01-28	2020-03-05	2020-01-25	2020-03-04	37	40	NA	NA	NA	NA	NA	NA	NA	NA	NA	NA	NA	NA	NA	NA	NA	NA	NA	NA	NA	NA	NA	NA	NA	NA	NA	NA	NA	NA	NA	NA	NA	NA	NA	NA	NA	NA	NA	NA
R032	50150887	R032_5	male	34	Severe	2020-01-28	2020-03-05	2020-01-25	2020-01-29	2	5	5	Yes	Yes	No	8	NA	NA	NA	NA	NA	NA	NA	NA	NA	NA	NA	NA	positive	NA	NA	NA	NA	NA	NA	NA	NA	NA	NA	NA	NA	NA	NA	NA	NA	NA	NA	NA	NA
R032	50150887	R032_56	male	34	Severe	2020-01-28	2020-03-05	2020-01-25	2020-03-20	53	56	NA	NA	NA	NA	NA	NA	NA	NA	NA	NA	NA	NA	NA	NA	NA	NA	NA	negative	NA	87	100	NA	4.42	404	7	1.02	negative	negative	+-	negative	negative	negative	negative	negative	negative	0	1	5
R032	50150887	R032_6	male	34	Severe	2020-01-28	2020-03-05	2020-01-25	2020-01-30	3	6	NA	NA	NA	NA	NA	NA	NA	NA	NA	NA	NA	NA	NA	NA	NA	NA	NA	NA	NA	NA	NA	NA	NA	NA	NA	NA	NA	NA	NA	NA	NA	NA	NA	NA	NA	NA	NA	NA
R032	50150887	R032_7	male	34	Severe	2020-01-28	2020-03-05	2020-01-25	2020-01-31	4	7	NA	NA	NA	NA	NA	NA	NA	NA	NA	NA	NA	NA	NA	NA	NA	NA	NA	NA	NA	101	83	27.6	5.75	275	NA	NA	NA	NA	NA	NA	NA	NA	NA	NA	NA	NA	NA	NA
R032	50150887	R032_748	male	34	Severe	2020-01-28	2020-03-05	2020-01-25	2022-02-10	745	748	0	No	No	No	0	NA	NA	NA	NA	NA	NA	NA	NA	NA	NA	NA	NA	NA	NA	89	95	36	3.99	366	5.5	1.037	negative	negative	1+	negative	negative	negative	negative	negative	negative	0	2	10
R032	50150887	R032_9	male	34	Severe	2020-01-28	2020-03-05	2020-01-25	2020-02-02	6	9	NA	NA	NA	NA	NA	NA	NA	NA	NA	NA	NA	NA	NA	NA	NA	NA	NA	NA	NA	84	104	25.8	5.05	277	NA	NA	NA	NA	NA	NA	NA	NA	NA	NA	NA	NA	NA	NA
R033	50150890	R033_10	female	33	non-Severe	2020-01-28	2020-02-10	2020-01-23	2020-02-01	5	10	NA	NA	NA	NA	NA	NA	NA	NA	NA	NA	NA	NA	NA	NA	NA	NA	NA	NA	NA	48	124	21.2	2.62	207	NA	NA	NA	NA	NA	NA	NA	NA	NA	NA	NA	NA	NA	NA
R033	50150890	R033_12	female	33	non-Severe	2020-01-28	2020-02-10	2020-01-23	2020-02-03	7	12	3	Yes	Yes	No	6	NA	NA	NA	NA	NA	NA	NA	NA	NA	NA	NA	NA	NA	negative	NA	NA	NA	NA	NA	NA	NA	NA	NA	NA	NA	NA	NA	NA	NA	NA	NA	NA	NA
R033	50150890	R033_13	female	33	non-Severe	2020-01-28	2020-02-10	2020-01-23	2020-02-04	8	13	NA	NA	NA	NA	NA	NA	NA	NA	NA	NA	NA	NA	NA	NA	NA	NA	NA	NA	NA	NA	NA	NA	NA	NA	NA	NA	NA	NA	NA	NA	NA	NA	NA	NA	NA	NA	NA	NA
R033	50150890	R033_14	female	33	non-Severe	2020-01-28	2020-02-10	2020-01-23	2020-02-05	9	14	NA	NA	NA	NA	NA	NA	NA	NA	NA	NA	NA	NA	NA	NA	NA	NA	NA	NA	negative	NA	NA	NA	NA	NA	NA	NA	NA	NA	NA	NA	NA	NA	NA	NA	NA	NA	NA	NA
R033	50150890	R033_141	female	33	non-Severe	2020-01-28	2020-02-10	2020-01-23	2020-06-11	136	141	NA	NA	NA	NA	NA	NA	NA	NA	NA	NA	NA	NA	NA	NA	NA	NA	NA	NA	NA	54	119	NA	4.86	259	5.5	1.03	negative	negative	negative	negative	negative	negative	+-	negative	negative	0	3	19
R033	50150890	R033_15	female	33	non-Severe	2020-01-28	2020-02-10	2020-01-23	2020-02-06	10	15	NA	NA	NA	NA	NA	NA	NA	NA	NA	NA	NA	NA	NA	NA	NA	NA	NA	NA	NA	58	117	27.8	3.34	237	NA	NA	NA	NA	NA	NA	NA	NA	NA	NA	NA	NA	NA	NA
R033	50150890	R033_17	female	33	non-Severe	2020-01-28	2020-02-10	2020-01-23	2020-02-08	12	17	2	Yes	No	No	3	NA	NA	NA	NA	NA	NA	NA	NA	NA	NA	NA	NA	NA	negative	NA	NA	NA	NA	NA	NA	NA	NA	NA	NA	NA	NA	NA	NA	NA	NA	NA	NA	NA
R033	50150890	R033_19	female	33	non-Severe	2020-01-28	2020-02-10	2020-01-23	2020-02-10	14	19	NA	NA	NA	NA	NA	NA	NA	NA	NA	NA	NA	NA	NA	NA	NA	NA	NA	NA	NA	NA	NA	NA	NA	NA	NA	NA	NA	NA	NA	NA	NA	NA	NA	NA	NA	NA	NA	NA
R033	50150890	R033_34	female	33	non-Severe	2020-01-28	2020-02-10	2020-01-23	2020-02-25	29	34	NA	NA	NA	NA	NA	NA	NA	NA	NA	NA	NA	NA	NA	NA	NA	NA	negative	negative	NA	57	117	36	6.21	206	7	1.025	+-	negative	+-	negative	negative	negative	negative	negative	negative	NA	3	15
R033	50150890	R033_395	female	33	non-Severe	2020-01-28	2020-02-10	2020-01-23	2021-02-20	390	395	NA	NA	NA	NA	NA	NA	NA	NA	NA	NA	NA	NA	NA	NA	NA	NA	NA	NA	negative	38	133	38.3	3.56	252	7	1.005	NA	negative	NA	negative	negative	negative	negative	negative	negative	NA	NA	0
R033	50150890	R033_397	female	33	non-Severe	2020-01-28	2020-02-10	2020-01-23	2021/2/22	392	397	0	No	No	No	0	NA	NA	NA	NA	NA	NA	NA	NA	NA	NA	NA	positive	negative	NA	NA	NA	NA	NA	NA	NA	NA	NA	NA	NA	NA	NA	NA	NA	NA	NA	NA	NA	NA
R033	50150890	R033_6	female	33	non-Severe	2020-01-28	2020-02-10	2020-01-23	2020-01-28	1	6	NA	NA	NA	NA	NA	NA	NA	NA	NA	NA	NA	NA	NA	NA	NA	NA	negative	NA	NA	53	120	25.4	3.54	277	NA	NA	NA	NA	NA	NA	NA	NA	NA	NA	NA	NA	NA	NA
R033	50150890	R033_7	female	33	non-Severe	2020-01-28	2020-02-10	2020-01-23	2020/1/29	2	7	3	Yes	No	No	4	NA	NA	NA	NA	NA	NA	NA	NA	NA	NA	NA	negative	negative	NA	NA	NA	NA	NA	NA	NA	NA	NA	NA	NA	NA	NA	NA	NA	NA	NA	NA	NA	NA
R033	50150890	R033_76	female	33	non-Severe	2020-01-28	2020-02-10	2020-01-23	2020-04-07	71	76	NA	NA	NA	NA	NA	NA	NA	NA	NA	NA	NA	NA	NA	NA	NA	NA	negative	negative	NA	52	NA	35.2	3.81	228	7	1.015	negative	negative	negative	negative	negative	negative	1+	negative	negative	0	4	21
R033	50150890	R033_8	female	33	non-Severe	2020-01-28	2020-02-10	2020-01-23	2020-01-30	3	8	NA	NA	NA	NA	NA	NA	NA	NA	NA	NA	NA	NA	NA	NA	NA	NA	negative	NA	NA	NA	NA	NA	NA	NA	NA	NA	NA	NA	NA	NA	NA	NA	NA	NA	NA	NA	NA	NA
R033	50150890	R033_9	female	33	non-Severe	2020-01-28	2020-02-10	2020-01-23	2020-01-31	4	9	NA	NA	NA	NA	NA	NA	NA	NA	NA	NA	NA	NA	NA	NA	NA	NA	NA	positive	NA	NA	NA	NA	NA	NA	NA	NA	NA	NA	NA	NA	NA	NA	NA	NA	NA	NA	NA	NA
R034	50150895	R034_132	female	23	non-Severe	2020-01-28	2020-02-02	2020-01-24	2020-06-03	128	132	NA	NA	NA	NA	NA	NA	NA	NA	NA	NA	NA	NA	NA	NA	NA	NA	NA	NA	NA	61	123	NA	2.42	271	5.5	1.03	negative	2+	+-	negative	negative	negative	negative	negative	negative	0	3	16
R034	50150895	R034_24	female	23	non-Severe	2020-01-28	2020-02-02	2020-01-24	2020-02-16	20	24	NA	NA	NA	NA	NA	NA	NA	NA	NA	NA	NA	NA	NA	NA	NA	NA	NA	negative	negative	63	120	36.2	2.86	249	NA	NA	NA	NA	NA	NA	NA	NA	NA	NA	NA	NA	NA	NA
R034	50150895	R034_42	female	23	non-Severe	2020-01-28	2020-02-02	2020-01-24	2020-03-05	38	42	NA	NA	NA	NA	NA	NA	NA	NA	NA	NA	NA	NA	NA	NA	NA	NA	negative	negative	NA	60	124	NA	3.71	283	6.5	1.02	negative	negative	negative	negative	negative	negative	negative	negative	negative	NA	4	20
R034	50150895	R034_5	female	23	non-Severe	2020-01-28	2020-02-02	2020-01-24	2020-01-28	1	5	NA	NA	NA	NA	NA	NA	NA	NA	Yes	NA	NA	NA	NA	NA	NA	NA	positive	NA	NA	66	113	37	2.98	260	NA	NA	NA	NA	NA	NA	NA	NA	NA	NA	NA	NA	NA	NA
R034	50150895	R034_6	female	23	non-Severe	2020-01-28	2020-02-02	2020-01-24	2020-01-29	2	6	1	Yes	No	No	2	NA	NA	NA	NA	NA	NA	NA	NA	NA	NA	NA	NA	negative	NA	NA	NA	NA	NA	NA	5.5	1.025	negative	negative	negative	negative	negative	negative	negative	negative	negative	0	4	20
R034	50150895	R034_7	female	23	non-Severe	2020-01-28	2020-02-02	2020-01-24	2020-01-30	3	7	NA	NA	NA	NA	NA	NA	NA	NA	NA	NA	NA	NA	NA	NA	NA	NA	NA	NA	negative	NA	NA	NA	NA	NA	NA	NA	NA	NA	NA	NA	NA	NA	NA	NA	NA	NA	NA	NA
R034	50150895	R034_8	female	23	non-Severe	2020-01-28	2020-02-02	2020-01-24	2020-01-31	4	8	NA	NA	NA	NA	NA	NA	NA	NA	NA	NA	NA	NA	NA	NA	NA	NA	NA	NA	negative	NA	NA	NA	NA	NA	NA	NA	NA	NA	NA	NA	NA	NA	NA	NA	NA	NA	NA	NA
R034	50150895	R034_9	female	23	non-Severe	2020-01-28	2020-02-02	2020-01-24	2020-02-01	5	9	NA	NA	NA	NA	NA	NA	NA	NA	Yes	NA	NA	NA	NA	NA	NA	NA	NA	NA	NA	72	102	33	3.01	312	NA	NA	NA	NA	NA	NA	NA	NA	NA	NA	NA	NA	NA	NA
R035	50150899	R035_10	female	64	non-Severe	2020-01-28	2020-02-10	2020-01-20	2020-01-29	2	10	2	Yes	Yes	Yes	8	NA	NA	NA	NA	NA	NA	NA	NA	NA	NA	NA	NA	negative	NA	NA	NA	NA	NA	NA	5.5	1.02	negative	+-	negative	negative	negative	negative	2+	negative	negative	0	271	1493
R035	50150899	R035_11	female	64	non-Severe	2020-01-28	2020-02-10	2020-01-20	2020-01-30	3	11	NA	NA	NA	NA	NA	NA	NA	NA	NA	NA	NA	NA	NA	NA	NA	NA	NA	NA	NA	NA	NA	NA	NA	NA	7	1.02	negative	+-	negative	negative	negative	negative	2+	negative	negative	0	73	403
R035	50150899	R035_13	female	64	non-Severe	2020-01-28	2020-02-10	2020-01-20	2020-02-01	5	13	5	Yes	Yes	Yes	11	NA	NA	NA	NA	NA	NA	NA	NA	NA	NA	NA	NA	NA	NA	NA	NA	NA	NA	NA	NA	NA	NA	NA	NA	NA	NA	NA	NA	NA	NA	NA	NA	NA
R035	50150899	R035_17	female	64	non-Severe	2020-01-28	2020-02-10	2020-01-20	2020-02-05	9	17	NA	NA	NA	NA	NA	NA	NA	NA	NA	NA	NA	NA	NA	NA	NA	NA	NA	NA	NA	NA	NA	NA	NA	NA	NA	NA	NA	NA	NA	NA	NA	NA	NA	NA	NA	NA	NA	NA
R035	50150899	R035_18	female	64	non-Severe	2020-01-28	2020-02-10	2020-01-20	2020-02-06	10	18	NA	NA	NA	NA	NA	NA	NA	NA	NA	NA	NA	NA	NA	NA	NA	NA	NA	NA	negative	68	82	38.9	2.91	182	7.5	1.02	negative	negative	negative	negative	negative	negative	negative	negative	negative	0	1	3
R035	50150899	R035_19	female	64	non-Severe	2020-01-28	2020-02-10	2020-01-20	2020-02-07	11	19	NA	NA	NA	NA	NA	NA	NA	NA	NA	NA	NA	NA	NA	NA	NA	NA	NA	NA	NA	NA	NA	NA	NA	NA	NA	NA	NA	NA	NA	NA	NA	NA	NA	NA	NA	NA	NA	NA
R035	50150899	R035_20	female	64	non-Severe	2020-01-28	2020-02-10	2020-01-20	2020-02-08	12	20	2	Yes	No	Yes	6	NA	NA	NA	NA	NA	NA	NA	NA	NA	NA	NA	NA	NA	negative	NA	NA	NA	NA	NA	NA	NA	NA	NA	NA	NA	NA	NA	NA	NA	NA	NA	NA	NA
R035	50150899	R035_21	female	64	non-Severe	2020-01-28	2020-02-10	2020-01-20	2020-02-09	13	21	NA	NA	NA	NA	NA	NA	NA	NA	NA	NA	NA	NA	NA	NA	NA	NA	NA	negative	NA	NA	NA	NA	NA	NA	NA	NA	NA	NA	NA	NA	NA	NA	NA	NA	NA	NA	NA	NA
R035	50150899	R035_22	female	64	non-Severe	2020-01-28	2020-02-10	2020-01-20	2020-02-10	14	22	NA	NA	NA	NA	NA	NA	NA	NA	NA	NA	NA	NA	NA	NA	NA	NA	NA	NA	NA	NA	NA	NA	NA	NA	NA	NA	NA	NA	NA	NA	NA	NA	NA	NA	NA	NA	NA	NA
R035	50150899	R035_37	female	64	non-Severe	2020-01-28	2020-02-10	2020-01-20	2020-02-25	29	37	NA	NA	NA	NA	NA	NA	NA	NA	NA	NA	NA	NA	NA	NA	NA	NA	negative	NA	NA	77	71	43.7	2.67	257	7	1.015	negative	negative	negative	negative	negative	negative	+-	negative	negative	NA	2	10
R035	50150899	R035_38	female	64	non-Severe	2020-01-28	2020-02-10	2020-01-20	2020-02-26	30	38	NA	NA	NA	NA	NA	NA	NA	NA	NA	NA	NA	NA	NA	NA	NA	NA	NA	NA	NA	NA	NA	NA	NA	NA	NA	NA	NA	NA	NA	NA	NA	NA	NA	NA	NA	NA	NA	NA
R035	50150899	R035_9	female	64	non-Severe	2020-01-28	2020-02-10	2020-01-20	2020-01-28	1	9	NA	NA	NA	NA	NA	NA	NA	NA	NA	NA	NA	NA	NA	NA	NA	NA	NA	NA	NA	71	81	38.2	6.47	249	NA	NA	NA	NA	NA	NA	NA	NA	NA	NA	NA	NA	NA	NA
R036	50150907	R036_11	male	57	non-Severe	2020-01-28	2020-02-20	2020-01-18	2020-01-28	1	11	NA	NA	NA	NA	NA	NA	NA	NA	NA	NA	NA	NA	NA	NA	NA	NA	NA	negative	NA	71	106	30.7	4.45	213	NA	NA	NA	NA	NA	NA	NA	NA	NA	NA	NA	NA	NA	NA
R036	50150907	R036_12	male	57	non-Severe	2020-01-28	2020-02-20	2020-01-18	2020-01-29	2	12	NA	NA	NA	NA	NA	NA	NA	NA	NA	NA	NA	NA	NA	NA	NA	NA	NA	NA	NA	NA	NA	NA	NA	NA	6	1.02	+-	negative	negative	negative	negative	negative	negative	negative	negative	0	1	6
R036	50150907	R036_13	male	57	non-Severe	2020-01-28	2020-02-20	2020-01-18	2020-01-30	3	13	5	Yes	No	Yes	9	NA	NA	NA	NA	NA	NA	NA	NA	NA	NA	NA	NA	NA	NA	NA	NA	NA	NA	NA	NA	NA	NA	NA	NA	NA	NA	NA	NA	NA	NA	NA	NA	NA
R036	50150907	R036_16	male	57	non-Severe	2020-01-28	2020-02-20	2020-01-18	2020-02-02	6	16	NA	NA	NA	NA	NA	NA	NA	NA	NA	NA	NA	NA	NA	NA	NA	NA	NA	NA	NA	NA	NA	NA	NA	NA	7	1.015	negative	negative	negative	negative	negative	negative	negative	negative	negative	0	0	2
R036	50150907	R036_17	male	57	non-Severe	2020-01-28	2020-02-20	2020-01-18	2020-02-03	7	17	NA	NA	NA	NA	NA	NA	NA	NA	NA	NA	NA	NA	NA	NA	NA	NA	NA	NA	positive	NA	NA	NA	NA	NA	NA	NA	NA	NA	NA	NA	NA	NA	NA	NA	NA	NA	NA	NA
R036	50150907	R036_18	male	57	non-Severe	2020-01-28	2020-02-20	2020-01-18	2020-02-04	8	18	5	Yes	Yes	Yes	11	NA	NA	NA	NA	NA	NA	NA	NA	NA	NA	NA	negative	negative	NA	NA	NA	NA	NA	NA	NA	NA	NA	NA	NA	NA	NA	NA	NA	NA	NA	NA	NA	NA
R036	50150907	R036_183	male	57	non-Severe	2020-01-28	2020-02-20	2020-01-18	2020-07-18	173	183	NA	NA	NA	NA	NA	NA	NA	NA	NA	NA	NA	NA	NA	NA	NA	NA	NA	NA	negative	NA	NA	NA	NA	NA	NA	NA	NA	NA	NA	NA	NA	NA	NA	NA	NA	NA	NA	NA
R036	50150907	R036_19	male	57	non-Severe	2020-01-28	2020-02-20	2020-01-18	2020-02-05	9	19	NA	NA	NA	NA	NA	NA	NA	NA	NA	NA	NA	NA	NA	NA	NA	NA	NA	NA	NA	NA	NA	NA	NA	NA	NA	NA	NA	NA	NA	NA	NA	NA	NA	NA	NA	NA	NA	NA
R036	50150907	R036_20	male	57	non-Severe	2020-01-28	2020-02-20	2020-01-18	2020-02-06	10	20	NA	NA	NA	NA	NA	NA	NA	NA	NA	NA	NA	NA	NA	NA	NA	NA	NA	NA	NA	76	96	51.1	5.25	239	NA	NA	NA	NA	NA	NA	NA	NA	NA	NA	NA	NA	NA	NA
R036	50150907	R036_21	male	57	non-Severe	2020-01-28	2020-02-20	2020-01-18	2020-02-07	11	21	NA	NA	NA	NA	NA	NA	NA	NA	NA	NA	NA	NA	NA	NA	NA	NA	NA	NA	NA	NA	NA	NA	NA	NA	NA	NA	NA	NA	NA	NA	NA	NA	NA	NA	NA	NA	NA	NA
R036	50150907	R036_23	male	57	non-Severe	2020-01-28	2020-02-20	2020-01-18	2020-02-09	13	23	NA	NA	NA	NA	NA	NA	NA	NA	NA	NA	NA	NA	NA	NA	NA	NA	NA	NA	negative	NA	NA	NA	NA	NA	NA	NA	NA	NA	NA	NA	NA	NA	NA	NA	NA	NA	NA	NA
R036	50150907	R036_26	male	57	non-Severe	2020-01-28	2020-02-20	2020-01-18	2020-02-12	16	26	NA	NA	NA	NA	NA	NA	NA	NA	NA	NA	NA	NA	NA	NA	NA	NA	NA	NA	NA	79	95	42.3	3.42	274	NA	NA	NA	NA	NA	NA	NA	NA	NA	NA	NA	NA	NA	NA
R036	50150907	R036_27	male	57	non-Severe	2020-01-28	2020-02-20	2020-01-18	2020-02-13	17	27	NA	NA	NA	NA	NA	NA	NA	NA	NA	NA	NA	NA	NA	NA	NA	NA	NA	NA	negative	NA	NA	NA	NA	NA	NA	NA	NA	NA	NA	NA	NA	NA	NA	NA	NA	NA	NA	NA
R036	50150907	R036_29	male	57	non-Severe	2020-01-28	2020-02-20	2020-01-18	2020-02-15	19	29	NA	NA	NA	NA	NA	NA	NA	NA	NA	NA	NA	NA	NA	NA	NA	NA	NA	NA	negative	NA	NA	NA	NA	NA	NA	NA	NA	NA	NA	NA	NA	NA	NA	NA	NA	NA	NA	NA
R036	50150907	R036_30	male	57	non-Severe	2020-01-28	2020-02-20	2020-01-18	2020-02-16	20	30	5	Yes	No	Yes	9	NA	NA	NA	NA	NA	NA	NA	NA	NA	NA	NA	NA	negative	NA	NA	NA	NA	NA	NA	NA	NA	NA	NA	NA	NA	NA	NA	NA	NA	NA	NA	NA	NA
R036	50150907	R036_31	male	57	non-Severe	2020-01-28	2020-02-20	2020-01-18	2020-02-17	21	31	NA	NA	NA	NA	NA	NA	NA	NA	NA	NA	NA	NA	NA	NA	NA	NA	negative	NA	NA	NA	NA	NA	NA	NA	NA	NA	NA	NA	NA	NA	NA	NA	NA	NA	NA	NA	NA	NA
R036	50150907	R036_32	male	57	non-Severe	2020-01-28	2020-02-20	2020-01-18	2020-02-18	22	32	NA	NA	NA	NA	NA	NA	NA	NA	NA	NA	NA	NA	NA	NA	NA	NA	NA	NA	NA	NA	NA	NA	NA	NA	NA	NA	NA	NA	NA	NA	NA	NA	NA	NA	NA	NA	NA	NA
R036	50150907	R036_33	male	57	non-Severe	2020-01-28	2020-02-20	2020-01-18	2020-02-19	23	33	NA	NA	NA	NA	NA	NA	NA	NA	NA	NA	NA	NA	NA	NA	NA	NA	NA	negative	NA	NA	NA	NA	NA	NA	NA	NA	NA	NA	NA	NA	NA	NA	NA	NA	NA	NA	NA	NA
R036	50150907	R036_34	male	57	non-Severe	2020-01-28	2020-02-20	2020-01-18	2020-02-20	24	34	NA	NA	NA	NA	NA	NA	NA	NA	NA	NA	NA	NA	NA	NA	NA	NA	NA	NA	NA	NA	NA	NA	NA	NA	NA	NA	NA	NA	NA	NA	NA	NA	NA	NA	NA	NA	NA	NA
R036	50150907	R036_389	male	57	non-Severe	2020-01-28	2020-02-20	2020-01-18	2021-02-09	379	389	2	Yes	No	No	3	NA	NA	NA	NA	NA	NA	NA	NA	NA	NA	NA	negative	NA	NA	65	102	58.5	5.35	357	7.5	1.018	NA	negative	NA	negative	negative	negative	negative	negative	negative	NA	NA	0
R036	50150907	R036_48	male	57	non-Severe	2020-01-28	2020-02-20	2020-01-18	2020-03-05	38	48	NA	NA	NA	NA	NA	NA	NA	NA	NA	NA	NA	NA	NA	NA	NA	NA	negative	negative	NA	82	91	NA	4.45	387	7	1.02	negative	negative	negative	negative	negative	negative	negative	negative	negative	NA	0	0
R036	50150907	R036_62	male	57	non-Severe	2020-01-28	2020-02-20	2020-01-18	2020-03-19	52	62	NA	NA	NA	NA	NA	NA	NA	NA	NA	NA	NA	NA	NA	NA	NA	NA	NA	negative	negative	76	96	NA	5.96	424	6	1.025	negative	negative	+-	negative	negative	negative	negative	negative	negative	0	1	4
R036	50150907	R036_755	male	57	non-Severe	2020-01-28	2020-02-20	2020-01-18	2022-02-10	745	755	4	Yes	No	Yes	8	NA	NA	NA	NA	NA	NA	NA	NA	NA	NA	NA	NA	NA	NA	73	96	49.7	5.97	379	5.5	1.025	negative	negative	negative	negative	negative	negative	negative	negative	negative	0	0	1
R037	50150948	R037_11	male	27	non-Severe	2020-01-29	2020-02-10	2020-01-19	2020-01-29	1	11	NA	NA	NA	NA	NA	NA	NA	NA	NA	NA	NA	NA	NA	NA	NA	NA	NA	NA	NA	78	118	31	3.68	209	NA	NA	NA	NA	NA	NA	NA	NA	NA	NA	NA	NA	NA	NA
R037	50150948	R037_12	male	27	non-Severe	2020-01-29	2020-02-10	2020-01-19	2020-01-30	2	12	NA	NA	NA	NA	NA	NA	NA	NA	NA	NA	NA	NA	NA	NA	NA	NA	NA	NA	NA	NA	NA	NA	NA	NA	6	1.02	negative	negative	+-	negative	negative	negative	negative	negative	negative	0	4	21
R037	50150948	R037_13	male	27	non-Severe	2020-01-29	2020-02-10	2020-01-19	2020-01-31	3	13	4	Yes	No	No	5	NA	NA	NA	NA	NA	NA	NA	NA	NA	NA	NA	NA	negative	NA	NA	NA	NA	NA	NA	NA	NA	NA	NA	NA	NA	NA	NA	NA	NA	NA	NA	NA	NA
R037	50150948	R037_14	male	27	non-Severe	2020-01-29	2020-02-10	2020-01-19	2020-02-01	4	14	NA	NA	NA	NA	NA	NA	NA	NA	NA	NA	NA	NA	Yes	NA	NA	NA	NA	NA	NA	NA	NA	NA	NA	NA	NA	NA	NA	NA	NA	NA	NA	NA	NA	NA	NA	NA	NA	NA
R037	50150948	R037_144	male	27	non-Severe	2020-01-29	2020-02-10	2020-01-19	2020-06-10	134	144	NA	NA	NA	NA	NA	NA	NA	NA	NA	NA	NA	NA	NA	NA	NA	NA	NA	NA	NA	69	124	NA	3.79	354	7	1.02	negative	negative	negative	negative	negative	negative	negative	negative	negative	0	1	3
R037	50150948	R037_16	male	27	non-Severe	2020-01-29	2020-02-10	2020-01-19	2020-02-03	6	16	NA	NA	NA	NA	NA	NA	NA	NA	NA	NA	NA	NA	NA	NA	NA	NA	NA	NA	negative	NA	NA	NA	NA	NA	NA	NA	NA	NA	NA	NA	NA	NA	NA	NA	NA	NA	NA	NA
R037	50150948	R037_18	male	27	non-Severe	2020-01-29	2020-02-10	2020-01-19	2020/2/5	8	18	4	Yes	No	Yes	8	NA	NA	NA	NA	NA	NA	NA	NA	NA	NA	NA	NA	negative	NA	NA	NA	NA	NA	NA	NA	NA	NA	NA	NA	NA	NA	NA	NA	NA	NA	NA	NA	NA
R037	50150948	R037_19	male	27	non-Severe	2020-01-29	2020-02-10	2020-01-19	2020-02-06	9	19	NA	NA	NA	NA	NA	NA	NA	NA	Yes	NA	NA	NA	NA	NA	NA	NA	NA	NA	negative	80	116	32.7	2.77	267	NA	NA	NA	NA	NA	NA	NA	NA	NA	NA	NA	NA	NA	NA
R037	50150948	R037_20	male	27	non-Severe	2020-01-29	2020-02-10	2020-01-19	2020-02-07	10	20	NA	NA	NA	NA	NA	NA	NA	NA	NA	NA	NA	NA	NA	NA	NA	NA	NA	NA	NA	NA	NA	NA	NA	NA	NA	NA	NA	NA	NA	NA	NA	NA	NA	NA	NA	NA	NA	NA
R037	50150948	R037_21	male	27	non-Severe	2020-01-29	2020-02-10	2020-01-19	2020-02-08	11	21	NA	NA	NA	NA	NA	NA	NA	NA	NA	NA	NA	NA	NA	NA	NA	NA	NA	NA	negative	NA	NA	NA	NA	NA	NA	NA	NA	NA	NA	NA	NA	NA	NA	NA	NA	NA	NA	NA
R037	50150948	R037_22	male	27	non-Severe	2020-01-29	2020-02-10	2020-01-19	2020-02-09	12	22	NA	NA	NA	NA	NA	NA	NA	NA	NA	NA	NA	NA	NA	NA	NA	NA	NA	negative	NA	NA	NA	NA	NA	NA	NA	NA	NA	NA	NA	NA	NA	NA	NA	NA	NA	NA	NA	NA
R037	50150948	R037_23	male	27	non-Severe	2020-01-29	2020-02-10	2020-01-19	2020-02-10	13	23	NA	NA	NA	NA	NA	NA	Yes	NA	Yes	NA	NA	NA	NA	NA	NA	NA	NA	NA	NA	NA	NA	NA	NA	NA	NA	NA	NA	NA	NA	NA	NA	NA	NA	NA	NA	NA	NA	NA
R037	50150948	R037_37	male	27	non-Severe	2020-01-29	2020-02-10	2020-01-19	2020-02-24	27	37	NA	NA	NA	NA	NA	NA	NA	NA	NA	NA	NA	NA	NA	NA	NA	NA	NA	negative	negative	72	122	NA	3.9	401	7	1.02	negative	+-	negative	negative	negative	negative	negative	negative	negative	NA	2	10
R037	50150948	R037_387	male	27	non-Severe	2020-01-29	2020-02-10	2020-01-19	2021-02-08	377	387	0	No	No	No	0	NA	Yes	NA	NA	NA	NA	NA	Yes	NA	NA	NA	NA	NA	negative	62	128	51.3	4	350	6.5	1.02	NA	negative	NA	negative	negative	negative	negative	negative	negative	NA	NA	0
R037	50150948	R037_51	male	27	non-Severe	2020-01-29	2020-02-10	2020-01-19	2020-03-09	41	51	NA	NA	NA	NA	NA	NA	NA	NA	NA	NA	NA	NA	NA	NA	NA	NA	negative	negative	NA	79	117	NA	4.06	352	6	1.025	negative	negative	negative	negative	negative	negative	negative	negative	negative	0	1	3
R037	50150948	R037_754	male	27	non-Severe	2020-01-29	2020-02-10	2020-01-19	2022-02-10	744	754	NA	NA	NA	NA	NA	NA	NA	NA	NA	NA	NA	NA	NA	NA	NA	NA	NA	NA	NA	72	119	50.5	3.59	364	6.5	1.023	negative	1+	+-	negative	negative	negative	negative	negative	negative	0	6	33
R038	50150952	R038_10	male	36	non-Severe	2020-01-29	2020-02-10	2020-01-24	2020-02-02	5	10	NA	NA	NA	NA	NA	NA	NA	NA	NA	NA	NA	NA	NA	NA	NA	NA	NA	NA	NA	NA	NA	NA	NA	NA	NA	NA	NA	NA	NA	NA	NA	NA	NA	NA	NA	NA	NA	NA
R038	50150952	R038_11	male	36	non-Severe	2020-01-29	2020-02-10	2020-01-24	2020-02-03	6	11	NA	NA	NA	NA	NA	NA	NA	NA	NA	NA	NA	NA	NA	NA	NA	NA	NA	NA	negative	NA	NA	NA	NA	NA	NA	NA	NA	NA	NA	NA	NA	NA	NA	NA	NA	NA	NA	NA
R038	50150952	R038_13	male	36	non-Severe	2020-01-29	2020-02-10	2020-01-24	2020-02-05	8	13	NA	NA	NA	NA	NA	NA	NA	NA	NA	NA	NA	NA	NA	NA	NA	NA	NA	NA	negative	NA	NA	NA	NA	NA	NA	NA	NA	NA	NA	NA	NA	NA	NA	NA	NA	NA	NA	NA
R038	50150952	R038_14	male	36	non-Severe	2020-01-29	2020-02-10	2020-01-24	2020-02-06	9	14	4	Yes	No	Yes	8	NA	NA	NA	NA	NA	NA	NA	NA	NA	NA	NA	NA	NA	NA	94	89	45	3.34	368	NA	NA	NA	NA	NA	NA	NA	NA	NA	NA	NA	NA	NA	NA
R038	50150952	R038_15	male	36	non-Severe	2020-01-29	2020-02-10	2020-01-24	2020-02-07	10	15	NA	NA	NA	NA	NA	NA	NA	NA	NA	NA	NA	NA	NA	NA	NA	NA	NA	NA	NA	NA	NA	NA	NA	NA	NA	NA	NA	NA	NA	NA	NA	NA	NA	NA	NA	NA	NA	NA
R038	50150952	R038_16	male	36	non-Severe	2020-01-29	2020-02-10	2020-01-24	2020-02-08	11	16	NA	NA	NA	NA	NA	NA	NA	NA	NA	NA	NA	NA	NA	NA	NA	NA	NA	NA	negative	NA	NA	NA	NA	NA	NA	NA	NA	NA	NA	NA	NA	NA	NA	NA	NA	NA	NA	NA
R038	50150952	R038_17	male	36	non-Severe	2020-01-29	2020-02-10	2020-01-24	2020-02-09	12	17	NA	NA	NA	NA	NA	NA	NA	NA	NA	NA	NA	NA	NA	NA	NA	NA	NA	negative	NA	NA	NA	NA	NA	NA	NA	NA	NA	NA	NA	NA	NA	NA	NA	NA	NA	NA	NA	NA
R038	50150952	R038_18	male	36	non-Severe	2020-01-29	2020-02-10	2020-01-24	2020-02-10	13	18	NA	NA	NA	NA	NA	NA	NA	NA	NA	NA	NA	NA	NA	NA	NA	NA	NA	NA	NA	NA	NA	NA	NA	NA	NA	NA	NA	NA	NA	NA	NA	NA	NA	NA	NA	NA	NA	NA
R038	50150952	R038_32	male	36	non-Severe	2020-01-29	2020-02-10	2020-01-24	2020-02-24	27	32	NA	NA	NA	NA	NA	NA	NA	NA	NA	NA	NA	NA	NA	NA	NA	NA	negative	negative	NA	81	107	NA	4.52	485	6	1.02	negative	negative	negative	negative	negative	negative	negative	negative	negative	NA	1	5
R038	50150952	R038_6	male	36	non-Severe	2020-01-29	2020-02-10	2020-01-24	2020-01-29	1	6	NA	NA	NA	NA	NA	NA	NA	NA	NA	NA	NA	NA	NA	NA	NA	NA	NA	NA	NA	91	93	37.1	4.47	369	NA	NA	NA	NA	NA	NA	NA	NA	NA	NA	NA	NA	NA	NA
R038	50150952	R038_7	male	36	non-Severe	2020-01-29	2020-02-10	2020-01-24	2020-01-30	2	7	NA	NA	NA	NA	NA	NA	NA	NA	NA	NA	NA	NA	NA	NA	NA	NA	NA	positive	NA	NA	NA	NA	NA	NA	NA	NA	NA	NA	NA	NA	NA	NA	NA	NA	NA	NA	NA	NA
R038	50150952	R038_73	male	36	non-Severe	2020-01-29	2020-02-10	2020-01-24	2020-04-05	68	73	NA	NA	NA	NA	NA	NA	NA	NA	NA	NA	NA	NA	NA	NA	NA	NA	NA	negative	negative	85	101	57.4	4.87	436	6	1.025	negative	negative	negative	negative	negative	negative	negative	negative	negative	0	1	3
R038	50150952	R038_74	male	36	non-Severe	2020-01-29	2020-02-10	2020-01-24	2020-04-06	69	74	NA	NA	NA	NA	NA	NA	NA	NA	NA	NA	NA	NA	NA	NA	NA	NA	NA	NA	negative	NA	NA	NA	NA	NA	NA	NA	NA	NA	NA	NA	NA	NA	NA	NA	NA	NA	NA	NA
R038	50150952	R038_8	male	36	non-Severe	2020-01-29	2020-02-10	2020-01-24	2020-01-31	3	8	NA	NA	NA	NA	NA	NA	NA	NA	NA	NA	NA	NA	NA	NA	NA	NA	NA	NA	NA	NA	NA	NA	NA	NA	5.5	1.025	negative	negative	1+	negative	negative	negative	+-	negative	negative	0	9	47
R038	50150952	R038_9	male	36	non-Severe	2020-01-29	2020-02-10	2020-01-24	2020/2/1	4	9	3	Yes	Yes	Yes	9	NA	NA	NA	NA	NA	NA	NA	NA	NA	NA	NA	NA	negative	NA	NA	NA	NA	NA	NA	NA	NA	NA	NA	NA	NA	NA	NA	NA	NA	NA	NA	NA	NA
R039	50150955	R039_10	male	20	non-Severe	2020-01-29	2020-02-10	2020-01-28	2020-02-06	9	10	NA	NA	NA	NA	NA	NA	NA	NA	NA	NA	NA	NA	NA	NA	NA	NA	NA	NA	NA	93	101	NA	3.38	326	NA	NA	NA	NA	NA	NA	NA	NA	NA	NA	NA	NA	NA	NA
R039	50150955	R039_105	male	20	non-Severe	2020-01-29	2020-02-10	2020-01-28	2020-05-11	104	105	NA	NA	NA	NA	NA	NA	NA	NA	NA	NA	NA	NA	NA	NA	NA	NA	NA	NA	NA	91	104	NA	7.36	354	5	1.015	negative	negative	negative	negative	negative	negative	negative	negative	negative	0	2	10
R039	50150955	R039_11	male	20	non-Severe	2020-01-29	2020-02-10	2020-01-28	2020-02-07	10	11	NA	NA	NA	NA	NA	NA	NA	NA	NA	NA	Yes	NA	NA	NA	NA	NA	NA	NA	negative	NA	NA	NA	NA	NA	NA	NA	NA	NA	NA	NA	NA	NA	NA	NA	NA	NA	NA	NA
R039	50150955	R039_12	male	20	non-Severe	2020-01-29	2020-02-10	2020-01-28	2020-02-08	11	12	1	Yes	No	No	2	NA	Yes	NA	NA	NA	NA	NA	NA	NA	NA	NA	NA	NA	negative	NA	NA	NA	NA	NA	NA	NA	NA	NA	NA	NA	NA	NA	NA	NA	NA	NA	NA	NA
R039	50150955	R039_2	male	20	non-Severe	2020-01-29	2020-02-10	2020-01-28	2020-01-29	1	2	1	Yes	Yes	No	4	Yes	Yes	Yes	NA	NA	NA	NA	NA	NA	NA	NA	positive	NA	NA	92	103	37.5	5.21	285	NA	NA	NA	NA	NA	NA	NA	NA	NA	NA	NA	NA	NA	NA
R039	50150955	R039_25	male	20	non-Severe	2020-01-29	2020-02-10	2020-01-28	2020-02-21	24	25	NA	NA	NA	NA	NA	NA	NA	NA	NA	NA	NA	NA	NA	NA	NA	NA	NA	NA	negative	NA	NA	NA	NA	NA	NA	NA	NA	NA	NA	NA	NA	NA	NA	NA	NA	NA	NA	NA
R039	50150955	R039_28	male	20	non-Severe	2020-01-29	2020-02-10	2020-01-28	2020-02-24	27	28	NA	NA	NA	NA	NA	NA	NA	NA	NA	NA	NA	NA	NA	NA	NA	NA	NA	negative	negative	82	118	NA	5.47	372	5.5	1.025	negative	negative	negative	negative	negative	negative	+-	negative	negative	NA	7	35
R039	50150955	R039_3	male	20	non-Severe	2020-01-29	2020-02-10	2020-01-28	2020-01-30	2	3	NA	NA	NA	NA	NA	NA	NA	NA	NA	NA	NA	NA	NA	NA	NA	NA	NA	NA	NA	NA	NA	NA	NA	NA	5.5	1.03	negative	negative	negative	negative	negative	negative	negative	negative	negative	0	1	4
R039	50150955	R039_379	male	20	non-Severe	2020-01-29	2020-02-10	2020-01-28	2021-02-09	378	379	1	Yes	No	No	2	NA	Yes	NA	NA	NA	NA	NA	NA	NA	NA	NA	negative	NA	NA	67	131	42.2	7.41	281	5.5	1.029	NA	negative	NA	negative	negative	negative	negative	negative	negative	NA	NA	0
R039	50150955	R039_4	male	20	non-Severe	2020-01-29	2020-02-10	2020-01-28	2020-01-31	3	4	NA	NA	NA	NA	NA	NA	NA	NA	NA	NA	NA	NA	NA	NA	NA	NA	NA	positive	NA	NA	NA	NA	NA	NA	NA	NA	NA	NA	NA	NA	NA	NA	NA	NA	NA	NA	NA	NA
R039	50150955	R039_45	male	20	non-Severe	2020-01-29	2020-02-10	2020-01-28	2020-03-12	44	45	NA	NA	NA	NA	NA	NA	NA	NA	NA	NA	NA	NA	NA	NA	NA	NA	NA	NA	negative	89	107	NA	6.72	356	NA	NA	NA	NA	NA	NA	NA	NA	NA	NA	NA	NA	NA	NA
R039	50150955	R039_745	male	20	non-Severe	2020-01-29	2020-02-10	2020-01-28	2022-02-10	744	745	0	No	No	No	0	NA	NA	NA	NA	NA	NA	NA	NA	NA	NA	NA	NA	NA	NA	80	120	42.9	6.93	334	5.5	1.035	negative	negative	negative	negative	negative	negative	negative	negative	negative	0	1	3
R040	50150958	R040_10	male	59	non-Severe	2020-01-29	2020-02-22	2020-01-28	2020-02-06	9	10	NA	NA	NA	NA	NA	NA	NA	NA	NA	NA	NA	NA	NA	NA	NA	NA	NA	NA	NA	89	81	38.1	4.14	280	NA	NA	NA	NA	NA	NA	NA	NA	NA	NA	NA	NA	NA	NA
R040	50150958	R040_11	male	59	non-Severe	2020-01-29	2020-02-22	2020-01-28	2020-02-07	10	11	NA	NA	NA	NA	NA	NA	NA	NA	NA	NA	NA	NA	NA	NA	NA	NA	NA	NA	NA	NA	NA	NA	NA	NA	NA	NA	NA	NA	NA	NA	NA	NA	NA	NA	NA	NA	NA	NA
R040	50150958	R040_12	male	59	non-Severe	2020-01-29	2020-02-22	2020-01-28	2020-02-08	11	12	3	Yes	No	No	4	NA	NA	NA	NA	NA	NA	NA	NA	NA	NA	NA	NA	NA	NA	NA	NA	NA	NA	NA	5	1.03	negative	+-	negative	negative	negative	negative	negative	negative	negative	0	1	5
R040	50150958	R040_13	male	59	non-Severe	2020-01-29	2020-02-22	2020-01-28	2020-02-09	12	13	NA	NA	NA	NA	NA	NA	NA	NA	NA	NA	NA	NA	NA	NA	NA	NA	NA	NA	negative	NA	NA	NA	NA	NA	NA	NA	NA	NA	NA	NA	NA	NA	NA	NA	NA	NA	NA	NA
R040	50150958	R040_15	male	59	non-Severe	2020-01-29	2020-02-22	2020-01-28	2020-02-11	14	15	NA	NA	NA	NA	NA	NA	NA	NA	NA	NA	NA	NA	NA	NA	NA	NA	NA	NA	NA	NA	NA	NA	NA	NA	NA	NA	NA	NA	NA	NA	NA	NA	NA	NA	NA	NA	NA	NA
R040	50150958	R040_16	male	59	non-Severe	2020-01-29	2020-02-22	2020-01-28	2020-02-12	15	16	NA	NA	NA	NA	NA	NA	NA	NA	NA	NA	NA	NA	NA	NA	NA	NA	NA	NA	negative	NA	NA	NA	NA	NA	NA	NA	NA	NA	NA	NA	NA	NA	NA	NA	NA	NA	NA	NA
R040	50150958	R040_172	male	59	non-Severe	2020-01-29	2020-02-22	2020-01-28	2020-07-17	171	172	NA	NA	NA	NA	NA	NA	NA	NA	NA	NA	NA	NA	NA	NA	NA	NA	negative	NA	NA	NA	NA	NA	NA	NA	NA	NA	NA	NA	NA	NA	NA	NA	NA	NA	NA	NA	NA	NA
R040	50150958	R040_19	male	59	non-Severe	2020-01-29	2020-02-22	2020-01-28	2020-02-15	18	19	NA	NA	NA	NA	NA	NA	NA	NA	NA	NA	NA	NA	NA	NA	NA	NA	NA	NA	negative	NA	NA	NA	NA	NA	NA	NA	NA	NA	NA	NA	NA	NA	NA	NA	NA	NA	NA	NA
R040	50150958	R040_2	male	59	non-Severe	2020-01-29	2020-02-22	2020-01-28	2020-01-29	1	2	3	Yes	No	No	4	NA	NA	NA	NA	NA	Yes	NA	NA	NA	NA	NA	NA	NA	positive	106	66	46.4	5.885	393	NA	NA	NA	NA	NA	NA	NA	NA	NA	NA	NA	NA	NA	NA
R040	50150958	R040_20	male	59	non-Severe	2020-01-29	2020-02-22	2020-01-28	2020-02-16	19	20	NA	NA	NA	NA	NA	NA	NA	NA	NA	NA	NA	NA	NA	NA	NA	NA	NA	positive	NA	NA	NA	NA	NA	NA	NA	NA	NA	NA	NA	NA	NA	NA	NA	NA	NA	NA	NA	NA
R040	50150958	R040_21	male	59	non-Severe	2020-01-29	2020-02-22	2020-01-28	2020-02-17	20	21	NA	NA	NA	NA	NA	NA	NA	NA	NA	NA	NA	NA	NA	NA	NA	NA	negative	negative	negative	NA	NA	NA	NA	NA	NA	NA	NA	NA	NA	NA	NA	NA	NA	NA	NA	NA	NA	NA
R040	50150958	R040_22	male	59	non-Severe	2020-01-29	2020-02-22	2020-01-28	2020-02-18	21	22	NA	NA	NA	NA	NA	NA	NA	NA	NA	NA	NA	NA	NA	NA	NA	NA	NA	NA	NA	89	81	49.3	5.21	312	NA	NA	NA	NA	NA	NA	NA	NA	NA	NA	NA	NA	NA	NA
R040	50150958	R040_23	male	59	non-Severe	2020-01-29	2020-02-22	2020-01-28	2020-02-19	22	23	NA	NA	NA	NA	NA	NA	NA	NA	NA	NA	NA	NA	NA	NA	NA	NA	NA	negative	NA	NA	NA	NA	NA	NA	NA	NA	NA	NA	NA	NA	NA	NA	NA	NA	NA	NA	NA	NA
R040	50150958	R040_24	male	59	non-Severe	2020-01-29	2020-02-22	2020-01-28	2020-02-20	23	24	1	Yes	No	No	2	NA	NA	NA	NA	NA	NA	NA	NA	NA	NA	NA	NA	negative	NA	NA	NA	NA	NA	NA	NA	NA	NA	NA	NA	NA	NA	NA	NA	NA	NA	NA	NA	NA
R040	50150958	R040_25	male	59	non-Severe	2020-01-29	2020-02-22	2020-01-28	2020-02-21	24	25	NA	NA	NA	NA	NA	NA	NA	NA	NA	NA	NA	NA	NA	NA	NA	NA	NA	negative	NA	NA	NA	NA	NA	NA	NA	NA	NA	NA	NA	NA	NA	NA	NA	NA	NA	NA	NA	NA
R040	50150958	R040_26	male	59	non-Severe	2020-01-29	2020-02-22	2020-01-28	2020-02-22	25	26	NA	NA	NA	NA	NA	NA	Yes	NA	NA	NA	NA	NA	NA	NA	NA	NA	NA	NA	NA	NA	NA	NA	NA	NA	NA	NA	NA	NA	NA	NA	NA	NA	NA	NA	NA	NA	NA	NA
R040	50150958	R040_28	male	59	non-Severe	2020-01-29	2020-02-22	2020-01-28	2020-02-24	27	28	NA	NA	NA	NA	NA	NA	NA	NA	NA	NA	NA	NA	NA	NA	NA	NA	negative	negative	NA	NA	NA	NA	NA	NA	NA	NA	NA	NA	NA	NA	NA	NA	NA	NA	NA	NA	NA	NA
R040	50150958	R040_3	male	59	non-Severe	2020-01-29	2020-02-22	2020-01-28	2020-01-30	2	3	NA	NA	NA	NA	NA	NA	NA	NA	NA	NA	NA	NA	NA	NA	NA	NA	NA	NA	NA	NA	NA	NA	NA	NA	NA	NA	NA	NA	NA	NA	NA	NA	NA	NA	NA	NA	NA	NA
R040	50150958	R040_377	male	59	non-Severe	2020-01-29	2020-02-22	2020-01-28	2021-02-07	376	377	0	No	No	No	0	NA	Yes	NA	NA	NA	NA	NA	NA	NA	NA	NA	NA	NA	negative	83	88	62.1	5.58	339	5	1.022	NA	+-	NA	negative	negative	negative	negative	negative	negative	NA	NA	1
R040	50150958	R040_42	male	59	non-Severe	2020-01-29	2020-02-22	2020-01-28	2020-03-09	41	42	NA	NA	NA	NA	NA	NA	NA	NA	NA	NA	NA	NA	NA	NA	NA	NA	negative	negative	NA	104	67	NA	7.03	386	5	1.03	negative	+-	negative	negative	negative	negative	negative	negative	negative	0	1	5
R040	50150958	R040_5	male	59	non-Severe	2020-01-29	2020-02-22	2020-01-28	2020-02-01	4	5	NA	NA	NA	NA	NA	Yes	Yes	Yes	NA	NA	NA	NA	NA	NA	NA	NA	NA	NA	NA	NA	NA	NA	NA	NA	NA	NA	NA	NA	NA	NA	NA	NA	NA	NA	NA	NA	NA	NA
R040	50150958	R040_56	male	59	non-Severe	2020-01-29	2020-02-22	2020-01-28	2020-03-23	55	56	NA	NA	NA	NA	NA	NA	NA	NA	NA	NA	NA	NA	NA	NA	NA	NA	negative	negative	NA	94	76	NA	5.28	353	5	1.03	negative	negative	negative	negative	negative	negative	negative	negative	negative	0	1	3
R040	50150958	R040_7	male	59	non-Severe	2020-01-29	2020-02-22	2020-01-28	2020-02-03	6	7	NA	NA	NA	NA	NA	NA	NA	NA	NA	NA	NA	NA	NA	NA	NA	NA	NA	NA	positive	NA	NA	NA	NA	NA	NA	NA	NA	NA	NA	NA	NA	NA	NA	NA	NA	NA	NA	NA
R040	50150958	R040_8	male	59	non-Severe	2020-01-29	2020-02-22	2020-01-28	2020-02-04	7	8	NA	NA	NA	NA	NA	NA	NA	NA	NA	NA	NA	NA	NA	NA	NA	NA	NA	NA	NA	NA	NA	NA	NA	NA	NA	NA	NA	NA	NA	NA	NA	NA	NA	NA	NA	NA	NA	NA
R041	50150964	R041_10	male	21	non-Severe	2020-01-29	2020-02-08	2020-01-24	2020-02-02	5	10	NA	NA	NA	NA	NA	NA	NA	NA	NA	NA	NA	NA	NA	NA	NA	NA	NA	NA	NA	NA	NA	NA	NA	NA	NA	NA	NA	NA	NA	NA	NA	NA	NA	NA	NA	NA	NA	NA
R041	50150964	R041_11	male	21	non-Severe	2020-01-29	2020-02-08	2020-01-24	2020-02-03	6	11	NA	NA	NA	NA	NA	NA	NA	NA	NA	NA	NA	NA	NA	NA	NA	NA	NA	NA	negative	NA	NA	NA	NA	NA	NA	NA	NA	NA	NA	NA	NA	NA	NA	NA	NA	NA	NA	NA
R041	50150964	R041_13	male	21	non-Severe	2020-01-29	2020-02-08	2020-01-24	2020-02-05	8	13	0	No	No	No	0	NA	NA	NA	NA	NA	NA	NA	NA	NA	NA	NA	NA	NA	negative	NA	NA	NA	NA	NA	NA	NA	NA	NA	NA	NA	NA	NA	NA	NA	NA	NA	NA	NA
R041	50150964	R041_14	male	21	non-Severe	2020-01-29	2020-02-08	2020-01-24	2020-02-06	9	14	NA	NA	NA	NA	NA	NA	NA	NA	NA	NA	NA	NA	NA	NA	NA	NA	NA	negative	NA	79	122	43.2	2.15	306	NA	NA	NA	NA	NA	NA	NA	NA	NA	NA	NA	NA	NA	NA
R041	50150964	R041_15	male	21	non-Severe	2020-01-29	2020-02-08	2020-01-24	2020-02-07	10	15	NA	NA	NA	NA	NA	Yes	NA	Yes	NA	NA	NA	NA	NA	NA	NA	NA	NA	NA	NA	NA	NA	NA	NA	NA	NA	NA	NA	NA	NA	NA	NA	NA	NA	NA	NA	NA	NA	NA
R041	50150964	R041_31	male	21	non-Severe	2020-01-29	2020-02-08	2020-01-24	2020-02-23	26	31	NA	NA	NA	NA	NA	NA	NA	NA	NA	NA	NA	NA	NA	NA	NA	NA	negative	NA	NA	NA	NA	NA	NA	NA	NA	NA	NA	NA	NA	NA	NA	NA	NA	NA	NA	NA	NA	NA
R041	50150964	R041_38	male	21	non-Severe	2020-01-29	2020-02-08	2020-01-24	2020-03-01	33	38	NA	NA	NA	NA	NA	NA	NA	NA	NA	NA	NA	NA	NA	NA	NA	NA	negative	negative	NA	74	124	NA	2.81	311	5	1.03	negative	negative	negative	negative	negative	negative	negative	negative	negative	NA	0	0
R041	50150964	R041_6	male	21	non-Severe	2020-01-29	2020-02-08	2020-01-24	2020-01-29	1	6	NA	NA	NA	NA	NA	NA	NA	NA	NA	NA	NA	NA	NA	NA	NA	NA	NA	NA	NA	88	108	39.1	3.83	322	NA	NA	NA	NA	NA	NA	NA	NA	NA	NA	NA	NA	NA	NA
R041	50150964	R041_7	male	21	non-Severe	2020-01-29	2020-02-08	2020-01-24	2020/1/30	2	7	NA	NA	NA	NA	NA	NA	NA	NA	NA	NA	Yes	NA	NA	NA	NA	NA	NA	NA	NA	NA	NA	NA	NA	NA	NA	NA	NA	NA	NA	NA	NA	NA	NA	NA	NA	NA	NA	NA
R041	50150964	R041_8	male	21	non-Severe	2020-01-29	2020-02-08	2020-01-24	2020-01-31	3	8	1	Yes	No	No	2	NA	NA	NA	NA	NA	NA	NA	NA	NA	NA	NA	NA	NA	NA	NA	NA	NA	NA	NA	5.5	1.02	negative	negative	negative	negative	negative	negative	negative	negative	negative	0	2	12
R042	50151007	R042_10	female	56	non-Severe	2020-01-30	2020-03-08	2020-01-25	2020-02-03	5	10	NA	NA	NA	NA	NA	NA	NA	NA	NA	NA	NA	NA	NA	NA	NA	NA	NA	NA	NA	NA	NA	NA	NA	NA	NA	NA	NA	NA	NA	NA	NA	NA	NA	NA	NA	NA	NA	NA
R042	50151007	R042_12	female	56	non-Severe	2020-01-30	2020-03-08	2020-01-25	2020-02-05	7	12	NA	NA	NA	NA	NA	NA	NA	NA	NA	NA	NA	NA	NA	NA	NA	NA	NA	NA	NA	NA	NA	NA	NA	NA	NA	NA	NA	NA	NA	NA	NA	NA	NA	NA	NA	NA	NA	NA
R042	50151007	R042_126	female	56	non-Severe	2020-01-30	2020-03-08	2020-01-25	2020-05-29	121	126	NA	NA	NA	NA	NA	NA	NA	NA	NA	NA	NA	NA	NA	NA	NA	NA	negative	NA	NA	NA	NA	NA	NA	NA	NA	NA	NA	NA	NA	NA	NA	NA	NA	NA	NA	NA	NA	NA
R042	50151007	R042_13	female	56	non-Severe	2020-01-30	2020-03-08	2020-01-25	2020-02-06	8	13	NA	NA	NA	NA	NA	NA	NA	NA	Yes	NA	NA	NA	NA	NA	NA	NA	NA	NA	NA	58	99	21.9	3.37	200	NA	NA	NA	NA	NA	NA	NA	NA	NA	NA	NA	NA	NA	NA
R042	50151007	R042_14	female	56	non-Severe	2020-01-30	2020-03-08	2020-01-25	2020-02-07	9	14	NA	NA	NA	NA	NA	NA	NA	NA	NA	NA	NA	NA	NA	NA	NA	NA	NA	NA	NA	NA	NA	NA	NA	NA	NA	NA	NA	NA	NA	NA	NA	NA	NA	NA	NA	NA	NA	NA
R042	50151007	R042_15	female	56	non-Severe	2020-01-30	2020-03-08	2020-01-25	2020-02-08	10	15	NA	NA	NA	NA	NA	NA	NA	NA	NA	NA	NA	NA	NA	NA	NA	NA	NA	NA	NA	NA	NA	NA	NA	NA	NA	NA	NA	NA	NA	NA	NA	NA	NA	NA	NA	NA	NA	NA
R042	50151007	R042_16	female	56	non-Severe	2020-01-30	2020-03-08	2020-01-25	2020-02-09	11	16	NA	NA	NA	NA	NA	NA	NA	NA	NA	NA	NA	NA	NA	NA	NA	NA	NA	NA	positive	NA	NA	NA	NA	NA	NA	NA	NA	NA	NA	NA	NA	NA	NA	NA	NA	NA	NA	NA
R042	50151007	R042_19	female	56	non-Severe	2020-01-30	2020-03-08	2020-01-25	2020-02-12	14	19	NA	NA	NA	NA	NA	NA	NA	NA	NA	NA	NA	NA	NA	NA	NA	NA	NA	NA	NA	NA	NA	NA	NA	NA	NA	NA	NA	NA	NA	NA	NA	NA	NA	NA	NA	NA	NA	NA
R042	50151007	R042_21	female	56	non-Severe	2020-01-30	2020-03-08	2020-01-25	2020-02-14	16	21	5	Yes	Yes	Yes	11	NA	NA	NA	NA	NA	NA	NA	NA	NA	NA	NA	negative	negative	NA	NA	NA	NA	NA	NA	NA	NA	NA	NA	NA	NA	NA	NA	NA	NA	NA	NA	NA	NA
R042	50151007	R042_22	female	56	non-Severe	2020-01-30	2020-03-08	2020-01-25	2020-02-15	17	22	NA	NA	NA	NA	NA	NA	NA	NA	NA	NA	NA	NA	NA	NA	NA	NA	NA	NA	negative	NA	NA	NA	NA	NA	NA	NA	NA	NA	NA	NA	NA	NA	NA	NA	NA	NA	NA	NA
R042	50151007	R042_25	female	56	non-Severe	2020-01-30	2020-03-08	2020-01-25	2020-02-18	20	25	NA	NA	NA	NA	NA	NA	NA	NA	Yes	NA	NA	NA	NA	NA	NA	NA	NA	NA	negative	69	85	45.4	2.98	243	NA	NA	NA	NA	NA	NA	NA	NA	NA	NA	NA	NA	NA	NA
R042	50151007	R042_26	female	56	non-Severe	2020-01-30	2020-03-08	2020-01-25	2020-02-19	21	26	NA	NA	NA	NA	NA	NA	NA	NA	NA	NA	NA	NA	NA	NA	NA	NA	negative	negative	NA	NA	NA	NA	NA	NA	NA	NA	NA	NA	NA	NA	NA	NA	NA	NA	NA	NA	NA	NA
R042	50151007	R042_27	female	56	non-Severe	2020-01-30	2020-03-08	2020-01-25	2020-02-20	22	27	NA	NA	NA	NA	NA	NA	NA	NA	NA	NA	NA	NA	NA	NA	NA	NA	NA	NA	negative	NA	NA	NA	NA	NA	NA	NA	NA	NA	NA	NA	NA	NA	NA	NA	NA	NA	NA	NA
R042	50151007	R042_31	female	56	non-Severe	2020-01-30	2020-03-08	2020-01-25	2020-02-24	26	31	NA	NA	NA	NA	NA	NA	NA	NA	NA	NA	NA	NA	NA	NA	NA	NA	positive	negative	NA	NA	NA	NA	NA	NA	NA	NA	NA	NA	NA	NA	NA	NA	NA	NA	NA	NA	NA	NA
R042	50151007	R042_32	female	56	non-Severe	2020-01-30	2020-03-08	2020-01-25	2020-02-25	27	32	NA	NA	NA	NA	NA	NA	NA	NA	Yes	NA	NA	NA	NA	NA	NA	NA	NA	NA	NA	64	93	NA	2	212	7.5	1.015	negative	negative	negative	negative	negative	negative	negative	negative	negative	0	0	2
R042	50151007	R042_33	female	56	non-Severe	2020-01-30	2020-03-08	2020-01-25	2020-02-26	28	33	NA	NA	NA	NA	NA	NA	NA	NA	NA	NA	NA	NA	NA	NA	NA	NA	positive	NA	NA	NA	NA	NA	NA	NA	NA	NA	NA	NA	NA	NA	NA	NA	NA	NA	NA	NA	NA	NA
R042	50151007	R042_34	female	56	non-Severe	2020-01-30	2020-03-08	2020-01-25	2020-02-27	29	34	NA	NA	NA	NA	NA	NA	NA	NA	NA	NA	NA	NA	NA	NA	NA	NA	positive	NA	NA	NA	NA	NA	NA	NA	NA	NA	NA	NA	NA	NA	NA	NA	NA	NA	NA	NA	NA	NA
R042	50151007	R042_37	female	56	non-Severe	2020-01-30	2020-03-08	2020-01-25	2020-03-01	32	37	NA	NA	NA	NA	NA	NA	NA	NA	NA	NA	NA	NA	NA	NA	NA	NA	positive	negative	NA	NA	NA	NA	NA	NA	NA	NA	NA	NA	NA	NA	NA	NA	NA	NA	NA	NA	NA	NA
R042	50151007	R042_39	female	56	non-Severe	2020-01-30	2020-03-08	2020-01-25	2020-03-03	34	39	NA	NA	NA	NA	NA	NA	NA	NA	Yes	NA	NA	NA	NA	NA	NA	NA	NA	NA	NA	63	95	NA	3.3	288	NA	NA	NA	NA	NA	NA	NA	NA	NA	NA	NA	NA	NA	NA
R042	50151007	R042_40	female	56	non-Severe	2020-01-30	2020-03-08	2020-01-25	2020-03-04	35	40	2	Yes	No	Yes	6	NA	NA	NA	NA	NA	NA	NA	NA	NA	NA	NA	negative	negative	NA	NA	NA	NA	NA	NA	5	1.015	negative	negative	negative	negative	negative	negative	negative	negative	negative	0	1	5
R042	50151007	R042_41	female	56	non-Severe	2020-01-30	2020-03-08	2020-01-25	2020-03-05	36	41	NA	NA	NA	NA	NA	NA	NA	NA	NA	NA	NA	NA	NA	NA	NA	NA	negative	NA	NA	NA	NA	NA	NA	NA	NA	NA	NA	NA	NA	NA	NA	NA	NA	NA	NA	NA	NA	NA
R042	50151007	R042_45	female	56	non-Severe	2020-01-30	2020-03-08	2020-01-25	2020-03-09	40	45	NA	NA	NA	NA	NA	NA	NA	NA	NA	NA	NA	NA	NA	NA	NA	NA	NA	NA	NA	NA	NA	NA	NA	NA	NA	NA	NA	NA	NA	NA	NA	NA	NA	NA	NA	NA	NA	NA
R042	50151007	R042_6	female	56	non-Severe	2020-01-30	2020-03-08	2020-01-25	2020-01-30	1	6	NA	NA	NA	NA	NA	NA	NA	NA	Yes	NA	NA	NA	NA	NA	NA	NA	NA	NA	NA	65	92	31.2	5.61	304	6	1.02	negative	negative	negative	negative	negative	negative	negative	negative	negative	0	6	32
R042	50151007	R042_7	female	56	non-Severe	2020-01-30	2020-03-08	2020-01-25	2020-01-31	2	7	5	Yes	No	No	6	NA	NA	NA	NA	NA	NA	NA	NA	NA	NA	NA	NA	positive	NA	NA	NA	NA	NA	NA	NA	NA	NA	NA	NA	NA	NA	NA	NA	NA	NA	NA	NA	NA
R043	50151010	R043_11	female	49	non-Severe	2020-01-30	2020-02-28	2020-01-20	2020-01-30	1	11	NA	NA	NA	NA	NA	NA	NA	NA	NA	NA	NA	NA	NA	NA	NA	NA	NA	NA	NA	60	103	27.6	3.24	121	NA	NA	NA	NA	NA	NA	NA	NA	NA	NA	NA	NA	NA	NA
R043	50151010	R043_12	female	49	non-Severe	2020-01-30	2020-02-28	2020-01-20	2020-01-31	2	12	5	Yes	Yes	Yes	11	NA	NA	NA	NA	NA	NA	NA	NA	NA	NA	NA	NA	negative	NA	NA	NA	NA	NA	NA	6	1.015	negative	negative	negative	negative	negative	negative	negative	negative	negative	0	2	10
R043	50151010	R043_14	female	49	non-Severe	2020-01-30	2020-02-28	2020-01-20	2020-02-02	4	14	NA	NA	NA	NA	NA	NA	NA	NA	NA	NA	NA	NA	NA	NA	NA	NA	NA	NA	NA	61	NA	36.9	3.56	259	NA	NA	NA	NA	NA	NA	NA	NA	NA	NA	NA	NA	NA	NA
R043	50151010	R043_142	female	49	non-Severe	2020-01-30	2020-02-28	2020-01-20	2020-06-09	132	142	NA	NA	NA	NA	NA	NA	NA	NA	NA	NA	NA	NA	NA	NA	NA	NA	negative	NA	NA	60	102	NA	3.23	308	5.5	1.025	negative	negative	negative	negative	negative	negative	negative	negative	negative	0	1	7
R043	50151010	R043_17	female	49	non-Severe	2020-01-30	2020-02-28	2020-01-20	2020-02-05	7	17	NA	NA	NA	NA	NA	NA	NA	NA	NA	NA	NA	NA	NA	NA	NA	NA	NA	NA	NA	NA	NA	NA	NA	NA	NA	NA	NA	NA	NA	NA	NA	NA	NA	NA	NA	NA	NA	NA
R043	50151010	R043_18	female	49	non-Severe	2020-01-30	2020-02-28	2020-01-20	2020-02-06	8	18	NA	NA	NA	NA	NA	NA	NA	NA	NA	NA	NA	NA	NA	NA	NA	NA	NA	NA	negative	NA	NA	NA	NA	NA	NA	NA	NA	NA	NA	NA	NA	NA	NA	NA	NA	NA	NA	NA
R043	50151010	R043_21	female	49	non-Severe	2020-01-30	2020-02-28	2020-01-20	2020-02-09	11	21	NA	NA	NA	NA	NA	NA	NA	NA	NA	NA	NA	NA	NA	NA	NA	NA	NA	NA	negative	NA	NA	NA	NA	NA	NA	NA	NA	NA	NA	NA	NA	NA	NA	NA	NA	NA	NA	NA
R043	50151010	R043_24	female	49	non-Severe	2020-01-30	2020-02-28	2020-01-20	2020-02-12	14	24	5	Yes	Yes	Yes	11	NA	NA	NA	NA	NA	NA	NA	NA	NA	NA	NA	NA	NA	NA	57	105	34.4	2.31	183	NA	NA	NA	NA	NA	NA	NA	NA	NA	NA	NA	NA	NA	NA
R043	50151010	R043_27	female	49	non-Severe	2020-01-30	2020-02-28	2020-01-20	2020-02-15	17	27	NA	NA	NA	NA	NA	NA	NA	NA	NA	NA	NA	NA	NA	NA	NA	NA	NA	NA	negative	NA	NA	NA	NA	NA	NA	NA	NA	NA	NA	NA	NA	NA	NA	NA	NA	NA	NA	NA
R043	50151010	R043_28	female	49	non-Severe	2020-01-30	2020-02-28	2020-01-20	2020-02-16	18	28	NA	NA	NA	NA	NA	NA	NA	NA	NA	NA	NA	NA	NA	NA	NA	NA	NA	NA	NA	NA	NA	NA	NA	NA	NA	NA	NA	NA	NA	NA	NA	NA	NA	NA	NA	NA	NA	NA
R043	50151010	R043_29	female	49	non-Severe	2020-01-30	2020-02-28	2020-01-20	2020-02-17	19	29	NA	NA	NA	NA	NA	NA	NA	NA	NA	NA	NA	NA	NA	NA	NA	NA	NA	NA	negative	NA	NA	NA	NA	NA	NA	NA	NA	NA	NA	NA	NA	NA	NA	NA	NA	NA	NA	NA
R043	50151010	R043_31	female	49	non-Severe	2020-01-30	2020-02-28	2020-01-20	2020-02-19	21	31	NA	NA	NA	NA	NA	NA	NA	NA	NA	NA	NA	NA	NA	NA	NA	NA	positive	negative	negative	NA	NA	NA	NA	NA	NA	NA	NA	NA	NA	NA	NA	NA	NA	NA	NA	NA	NA	NA
R043	50151010	R043_32	female	49	non-Severe	2020-01-30	2020-02-28	2020-01-20	2020-02-20	22	32	NA	NA	NA	NA	NA	NA	NA	NA	NA	NA	NA	NA	NA	NA	NA	NA	NA	NA	NA	59	103	NA	1.88	214	NA	NA	NA	NA	NA	NA	NA	NA	NA	NA	NA	NA	NA	NA
R043	50151010	R043_33	female	49	non-Severe	2020-01-30	2020-02-28	2020-01-20	2020-02-21	23	33	NA	NA	NA	NA	NA	NA	NA	NA	NA	NA	NA	NA	NA	NA	NA	NA	negative	NA	NA	NA	NA	NA	NA	NA	NA	NA	NA	NA	NA	NA	NA	NA	NA	NA	NA	NA	NA	NA
R043	50151010	R043_34	female	49	non-Severe	2020-01-30	2020-02-28	2020-01-20	2020-02-22	24	34	NA	NA	NA	NA	NA	NA	NA	NA	NA	NA	NA	NA	NA	NA	NA	NA	NA	NA	NA	NA	NA	NA	NA	NA	NA	NA	NA	NA	NA	NA	NA	NA	NA	NA	NA	NA	NA	NA
R043	50151010	R043_36	female	49	non-Severe	2020-01-30	2020-02-28	2020-01-20	2020-02-24	26	36	NA	NA	NA	NA	NA	NA	NA	NA	NA	NA	NA	NA	NA	NA	NA	NA	negative	negative	NA	NA	NA	NA	NA	NA	NA	NA	NA	NA	NA	NA	NA	NA	NA	NA	NA	NA	NA	NA
R043	50151010	R043_37	female	49	non-Severe	2020-01-30	2020-02-28	2020-01-20	2020-02-25	27	37	NA	NA	NA	NA	NA	NA	NA	NA	NA	NA	NA	NA	NA	NA	NA	NA	negative	negative	NA	NA	NA	NA	NA	NA	NA	NA	NA	NA	NA	NA	NA	NA	NA	NA	NA	NA	NA	NA
R043	50151010	R043_38	female	49	non-Severe	2020-01-30	2020-02-28	2020-01-20	2020-02-26	28	38	4	Yes	No	Yes	8	NA	NA	NA	NA	NA	NA	NA	NA	NA	NA	NA	NA	NA	NA	63	99	39.2	2.41	204	NA	NA	NA	NA	NA	NA	NA	NA	NA	NA	NA	NA	NA	NA
R043	50151010	R043_386	female	49	non-Severe	2020-01-30	2020-02-28	2020-01-20	2021-02-08	376	386	0	No	No	No	0	NA	NA	NA	NA	NA	NA	NA	NA	NA	NA	NA	NA	NA	negative	41	115	54.8	4.37	283	5	1.026	NA	negative	NA	negative	negative	negative	negative	negative	negative	NA	NA	0
R043	50151010	R043_40	female	49	non-Severe	2020-01-30	2020-02-28	2020-01-20	2020-02-28	30	40	NA	NA	NA	NA	NA	NA	NA	NA	NA	NA	NA	NA	NA	NA	NA	NA	NA	NA	NA	NA	NA	NA	NA	NA	NA	NA	NA	NA	NA	NA	NA	NA	NA	NA	NA	NA	NA	NA
R043	50151010	R043_54	female	49	non-Severe	2020-01-30	2020-02-28	2020-01-20	2020-03-13	44	54	NA	NA	NA	NA	NA	NA	NA	NA	NA	NA	NA	NA	NA	NA	NA	NA	negative	negative	NA	64	97	43.7	3.02	239	NA	NA	NA	NA	NA	NA	NA	NA	NA	NA	NA	NA	NA	NA
R043	50151010	R043_752	female	49	non-Severe	2020-01-30	2020-02-28	2020-01-20	2022-02-09	742	752	NA	NA	NA	NA	NA	NA	NA	NA	NA	NA	NA	NA	NA	NA	NA	NA	NA	NA	NA	45	110	49	3.92	256	5.5	1.025	negative	negative	negative	negative	negative	negative	negative	negative	negative	0	1	4
R044	50151027	R044_11	female	46	non-Severe	2020-01-30	2020-02-15	2020-01-26	2020-02-05	7	11	NA	NA	NA	NA	NA	NA	NA	NA	NA	NA	NA	NA	NA	NA	NA	NA	NA	positive	negative	NA	NA	NA	NA	NA	NA	NA	NA	NA	NA	NA	NA	NA	NA	NA	NA	NA	NA	NA
R044	50151027	R044_12	female	46	non-Severe	2020-01-30	2020-02-15	2020-01-26	2020-02-06	8	12	1	Yes	No	No	2	NA	NA	NA	NA	NA	NA	NA	NA	NA	NA	NA	NA	NA	positive	54	109	NA	3.96	235	NA	NA	NA	NA	NA	NA	NA	NA	NA	NA	NA	NA	NA	NA
R044	50151027	R044_13	female	46	non-Severe	2020-01-30	2020-02-15	2020-01-26	2020-02-07	9	13	NA	NA	NA	NA	NA	Yes	Yes	Yes	NA	NA	NA	NA	NA	NA	NA	NA	NA	NA	NA	NA	NA	NA	NA	NA	NA	NA	NA	NA	NA	NA	NA	NA	NA	NA	NA	NA	NA	NA
R044	50151027	R044_143	female	46	non-Severe	2020-01-30	2020-02-15	2020-01-26	2020-06-16	139	143	NA	NA	NA	NA	NA	NA	NA	NA	NA	NA	NA	NA	NA	NA	NA	NA	NA	NA	NA	55	108	NA	5.36	256	6	1.025	negative	negative	negative	negative	negative	negative	1+	negative	negative	0	5	26
R044	50151027	R044_18	female	46	non-Severe	2020-01-30	2020-02-15	2020-01-26	2020-02-12	14	18	NA	NA	NA	NA	NA	NA	NA	NA	NA	NA	NA	NA	NA	NA	NA	NA	NA	NA	negative	NA	NA	NA	NA	NA	NA	NA	NA	NA	NA	NA	NA	NA	NA	NA	NA	NA	NA	NA
R044	50151027	R044_19	female	46	non-Severe	2020-01-30	2020-02-15	2020-01-26	2020-02-13	15	19	1	Yes	No	No	2	NA	NA	NA	NA	NA	NA	NA	NA	NA	NA	NA	NA	NA	negative	NA	NA	NA	NA	NA	NA	NA	NA	NA	NA	NA	NA	NA	NA	NA	NA	NA	NA	NA
R044	50151027	R044_20	female	46	non-Severe	2020-01-30	2020-02-15	2020-01-26	2020-02-14	16	20	NA	NA	NA	NA	NA	NA	NA	NA	NA	NA	NA	NA	NA	NA	NA	NA	NA	NA	NA	57	107	NA	3.27	252	NA	NA	NA	NA	NA	NA	NA	NA	NA	NA	NA	NA	NA	NA
R044	50151027	R044_21	female	46	non-Severe	2020-01-30	2020-02-15	2020-01-26	2020-02-15	17	21	NA	NA	NA	NA	NA	NA	NA	NA	NA	NA	NA	NA	NA	NA	NA	NA	NA	NA	NA	NA	NA	NA	NA	NA	NA	NA	NA	NA	NA	NA	NA	NA	NA	NA	NA	NA	NA	NA
R044	50151027	R044_35	female	46	non-Severe	2020-01-30	2020-02-15	2020-01-26	2020-02-29	31	35	NA	NA	NA	NA	NA	NA	NA	NA	NA	NA	NA	NA	NA	NA	NA	NA	negative	negative	NA	49	113	NA	4.07	268	5.5	1.03	negative	negative	negative	negative	negative	negative	+-	negative	negative	0	1	7
R044	50151027	R044_381	female	46	non-Severe	2020-01-30	2020-02-15	2020-01-26	2021-02-09	377	381	0	No	No	No	0	NA	Yes	NA	NA	NA	NA	NA	NA	NA	NA	NA	negative	NA	negative	35	125	46.9	4.23	252	6.5	1.026	NA	negative	NA	negative	negative	negative	negative	negative	negative	NA	NA	0
R044	50151027	R044_5	female	46	non-Severe	2020-01-30	2020-02-15	2020-01-26	2020-01-30	1	5	NA	NA	NA	NA	NA	NA	NA	NA	NA	NA	NA	NA	NA	NA	NA	NA	NA	NA	NA	55	108	39.2	4.17	215	NA	NA	NA	NA	NA	NA	NA	NA	NA	NA	NA	NA	NA	NA
R044	50151027	R044_52	female	46	non-Severe	2020-01-30	2020-02-15	2020-01-26	2020-03-17	48	52	NA	NA	NA	NA	NA	NA	NA	NA	NA	NA	NA	NA	NA	NA	NA	NA	NA	negative	negative	50	112	NA	4.11	375	5.5	1.025	negative	negative	negative	negative	negative	negative	1+	negative	negative	0	25	138
R044	50151027	R044_6	female	46	non-Severe	2020-01-30	2020-02-15	2020-01-26	2020-01-31	2	6	NA	NA	NA	NA	NA	NA	NA	NA	NA	NA	Yes	NA	NA	NA	NA	NA	NA	positive	NA	NA	NA	NA	NA	NA	5.5	1.025	negative	negative	negative	negative	negative	negative	negative	negative	negative	0	4	23
R044	50151027	R044_746	female	46	non-Severe	2020-01-30	2020-02-15	2020-01-26	2022-02-09	742	746	NA	NA	NA	NA	NA	NA	NA	NA	NA	NA	NA	NA	NA	NA	NA	NA	NA	NA	NA	43	115	46.4	5.54	308	5	1.015	negative	negative	negative	negative	negative	negative	negative	negative	negative	0	2	11
R045	50151057	R045_14	male	47	Severe	2020-01-31	2020-02-22	2020-01-18	2020-01-31	1	14	5	Yes	Yes	No	8	NA	NA	Yes	Yes	NA	NA	NA	NA	NA	NA	NA	NA	negative	NA	93	84	36.1	9.97	406	NA	NA	NA	NA	NA	NA	NA	NA	NA	NA	NA	NA	NA	NA
R045	50151057	R045_15	male	47	Severe	2020-01-31	2020-02-22	2020-01-18	2020-02-01	2	15	NA	NA	NA	NA	NA	Yes	NA	Yes	NA	NA	NA	NA	NA	NA	NA	NA	NA	NA	NA	NA	NA	NA	NA	NA	NA	NA	NA	NA	NA	NA	NA	NA	NA	NA	NA	NA	NA	NA
R045	50151057	R045_16	male	47	Severe	2020-01-31	2020-02-22	2020-01-18	2020-02-02	3	16	NA	NA	NA	NA	NA	NA	NA	NA	NA	Yes	Yes	Yes	NA	Yes	Yes	NA	NA	NA	NA	NA	NA	NA	NA	NA	NA	NA	NA	NA	NA	NA	NA	NA	NA	NA	NA	NA	NA	NA
R045	50151057	R045_17	male	47	Severe	2020-01-31	2020-02-22	2020-01-18	2020-02-03	4	17	NA	NA	NA	NA	NA	NA	NA	NA	NA	NA	NA	NA	NA	NA	NA	NA	NA	NA	NA	NA	NA	NA	NA	NA	NA	NA	NA	NA	NA	NA	NA	NA	NA	NA	NA	NA	NA	NA
R045	50151057	R045_18	male	47	Severe	2020-01-31	2020-02-22	2020-01-18	2020-02-04	5	18	NA	NA	NA	NA	NA	NA	NA	NA	NA	NA	NA	NA	NA	NA	NA	NA	NA	NA	NA	NA	NA	NA	NA	NA	NA	NA	NA	NA	NA	NA	NA	NA	NA	NA	NA	NA	NA	NA
R045	50151057	R045_19	male	47	Severe	2020-01-31	2020-02-22	2020-01-18	2020-02-05	6	19	NA	NA	NA	NA	NA	NA	NA	NA	NA	NA	NA	NA	NA	NA	NA	NA	NA	NA	NA	NA	NA	NA	NA	NA	6	1.015	negative	negative	negative	4+	negative	negative	negative	negative	negative	0	1	4
R045	50151057	R045_20	male	47	Severe	2020-01-31	2020-02-22	2020-01-18	2020-02-06	7	20	NA	NA	NA	NA	NA	NA	NA	NA	NA	NA	NA	NA	NA	NA	NA	NA	NA	NA	NA	NA	NA	NA	NA	NA	NA	NA	NA	NA	NA	NA	NA	NA	NA	NA	NA	NA	NA	NA
R045	50151057	R045_21	male	47	Severe	2020-01-31	2020-02-22	2020-01-18	2020-02-07	8	21	NA	NA	NA	NA	NA	NA	NA	NA	NA	NA	NA	NA	NA	NA	NA	NA	NA	NA	negative	NA	NA	NA	NA	NA	NA	NA	NA	NA	NA	NA	NA	NA	NA	NA	NA	NA	NA	NA
R045	50151057	R045_23	male	47	Severe	2020-01-31	2020-02-22	2020-01-18	2020-02-09	10	23	NA	NA	NA	NA	NA	NA	NA	Yes	Yes	NA	NA	NA	NA	NA	NA	NA	NA	NA	negative	NA	NA	NA	NA	NA	NA	NA	NA	NA	NA	NA	NA	NA	NA	NA	NA	NA	NA	NA
R045	50151057	R045_24	male	47	Severe	2020-01-31	2020-02-22	2020-01-18	2020-02-10	11	24	5	Yes	Yes	Yes	11	NA	NA	Yes	Yes	NA	NA	NA	NA	NA	NA	NA	NA	NA	NA	77	103	43.7	3.88	290	NA	NA	NA	NA	NA	NA	NA	NA	NA	NA	NA	NA	NA	NA
R045	50151057	R045_27	male	47	Severe	2020-01-31	2020-02-22	2020-01-18	2020-02-13	14	27	NA	NA	NA	NA	NA	NA	NA	Yes	Yes	NA	NA	NA	NA	NA	NA	NA	NA	NA	NA	88	90	33	2.43	310	NA	NA	NA	NA	NA	NA	NA	NA	NA	NA	NA	NA	NA	NA
R045	50151057	R045_28	male	47	Severe	2020-01-31	2020-02-22	2020-01-18	2020-02-14	15	28	NA	NA	NA	NA	NA	NA	NA	Yes	Yes	NA	NA	NA	NA	NA	NA	NA	negative	NA	NA	86	92	28.3	2.35	324	NA	NA	NA	NA	NA	NA	NA	NA	NA	NA	NA	NA	NA	NA
R045	50151057	R045_29	male	47	Severe	2020-01-31	2020-02-22	2020-01-18	2020-02-15	16	29	NA	NA	NA	NA	NA	NA	NA	NA	NA	NA	NA	NA	NA	NA	NA	NA	negative	NA	NA	NA	NA	NA	NA	NA	NA	NA	NA	NA	NA	NA	NA	NA	NA	NA	NA	NA	NA	NA
R045	50151057	R045_30	male	47	Severe	2020-01-31	2020-02-22	2020-01-18	2020-02-16	17	30	NA	NA	NA	NA	NA	NA	NA	NA	NA	NA	NA	NA	NA	NA	NA	NA	NA	negative	NA	NA	NA	NA	NA	NA	NA	NA	NA	NA	NA	NA	NA	NA	NA	NA	NA	NA	NA	NA
R045	50151057	R045_32	male	47	Severe	2020-01-31	2020-02-22	2020-01-18	2020-02-18	19	32	NA	NA	NA	NA	NA	NA	NA	NA	NA	NA	NA	NA	NA	NA	NA	NA	negative	NA	NA	NA	NA	NA	NA	NA	NA	NA	NA	NA	NA	NA	NA	NA	NA	NA	NA	NA	NA	NA
R045	50151057	R045_33	male	47	Severe	2020-01-31	2020-02-22	2020-01-18	2020-02-19	20	33	NA	NA	NA	NA	NA	NA	NA	Yes	Yes	NA	NA	NA	NA	NA	NA	negative	NA	NA	negative	79	102	41.7	4	317	NA	NA	NA	NA	NA	NA	NA	NA	NA	NA	NA	NA	NA	NA
R045	50151057	R045_34	male	47	Severe	2020-01-31	2020-02-22	2020-01-18	2020/2/20	21	34	4	Yes	No	No	5	NA	NA	NA	NA	NA	NA	NA	NA	NA	NA	NA	NA	NA	NA	NA	NA	NA	NA	NA	NA	NA	NA	NA	NA	NA	NA	NA	NA	NA	NA	NA	NA	NA
R045	50151057	R045_35	male	47	Severe	2020-01-31	2020-02-22	2020-01-18	2020-02-21	22	35	NA	NA	NA	NA	NA	NA	NA	Yes	Yes	NA	NA	NA	NA	NA	NA	NA	NA	negative	NA	NA	NA	NA	NA	NA	NA	NA	NA	NA	NA	NA	NA	NA	NA	NA	NA	NA	NA	NA
R045	50151057	R045_51	male	47	Severe	2020-01-31	2020-02-22	2020-01-18	2020-03-08	38	51	NA	NA	NA	NA	NA	NA	NA	NA	NA	NA	NA	NA	NA	NA	NA	NA	negative	NA	negative	81	99	54.5	3.65	446	5.5	1.015	negative	1+	negative	negative	negative	negative	negative	negative	negative	0	1	4
R046	50151058	R046_110	male	35	non-Severe	2020-01-31	2020-02-16	2020-01-25	2020-05-13	104	110	NA	NA	NA	NA	NA	NA	NA	NA	NA	NA	NA	NA	NA	NA	NA	NA	negative	NA	NA	100	84	NA	6.75	423	5	1.03	negative	negative	negative	negative	negative	negative	negative	negative	negative	0	4	24
R046	50151058	R046_14	male	35	non-Severe	2020-01-31	2020-02-16	2020-01-25	2020-02-07	8	14	NA	NA	NA	NA	NA	NA	NA	NA	NA	NA	NA	NA	NA	NA	NA	NA	NA	NA	negative	NA	NA	NA	NA	NA	NA	NA	NA	NA	NA	NA	NA	NA	NA	NA	NA	NA	NA	NA
R046	50151058	R046_15	male	35	non-Severe	2020-01-31	2020-02-16	2020-01-25	2020-02-08	9	15	5	Yes	No	No	6	NA	NA	NA	NA	NA	NA	NA	NA	NA	NA	NA	NA	NA	negative	107	77	NA	4.11	380	NA	NA	NA	NA	NA	NA	NA	NA	NA	NA	NA	NA	NA	NA
R046	50151058	R046_16	male	35	non-Severe	2020-01-31	2020-02-16	2020-01-25	2020-02-09	10	16	NA	NA	NA	NA	NA	NA	NA	NA	NA	NA	NA	NA	NA	NA	NA	NA	NA	NA	NA	NA	NA	NA	NA	NA	NA	NA	NA	NA	NA	NA	NA	NA	NA	NA	NA	NA	NA	NA
R046	50151058	R046_21	male	35	non-Severe	2020-01-31	2020-02-16	2020-01-25	2020/2/14	15	21	5	Yes	No	No	6	NA	NA	NA	NA	NA	NA	NA	NA	NA	NA	NA	positive	NA	positive	NA	NA	NA	NA	NA	NA	NA	NA	NA	NA	NA	NA	NA	NA	NA	NA	NA	NA	NA
R046	50151058	R046_22	male	35	non-Severe	2020-01-31	2020-02-16	2020-01-25	2020-02-15	16	22	NA	NA	NA	NA	NA	NA	NA	NA	NA	NA	NA	NA	NA	NA	NA	NA	negative	NA	NA	NA	NA	NA	NA	NA	NA	NA	NA	NA	NA	NA	NA	NA	NA	NA	NA	NA	NA	NA
R046	50151058	R046_23	male	35	non-Severe	2020-01-31	2020-02-16	2020-01-25	2020-02-16	17	23	NA	NA	NA	NA	NA	NA	NA	NA	NA	NA	NA	NA	NA	NA	NA	NA	NA	NA	NA	NA	NA	NA	NA	NA	NA	NA	NA	NA	NA	NA	NA	NA	NA	NA	NA	NA	NA	NA
R046	50151058	R046_382	male	35	non-Severe	2020-01-31	2020-02-16	2020-01-25	2021-02-09	376	382	2	Yes	No	No	3	NA	NA	NA	NA	NA	NA	NA	Yes	NA	NA	NA	negative	NA	negative	104	79	62.8	7.64	485	5.5	1.026	NA	negative	NA	negative	negative	negative	negative	negative	negative	NA	NA	0
R046	50151058	R046_39	male	35	non-Severe	2020-01-31	2020-02-16	2020-01-25	2020-03-03	33	39	NA	NA	NA	NA	NA	NA	NA	NA	NA	NA	NA	NA	NA	NA	NA	NA	negative	negative	NA	111	74	NA	4.94	499	5.5	1.025	negative	+-	negative	negative	negative	negative	negative	negative	negative	0	0	2
R046	50151058	R046_52	male	35	non-Severe	2020-01-31	2020-02-16	2020-01-25	2020-03-16	46	52	NA	NA	NA	NA	NA	NA	NA	NA	NA	NA	NA	NA	NA	NA	NA	NA	negative	negative	NA	107	77	NA	6.64	489	5	1.03	negative	negative	negative	negative	negative	negative	negative	negative	negative	0	1	4
R046	50151058	R046_7	male	35	non-Severe	2020-01-31	2020-02-16	2020-01-25	2020-01-31	1	7	NA	NA	NA	NA	NA	NA	NA	NA	NA	NA	NA	NA	NA	NA	NA	NA	NA	negative	NA	99	85	31.1	5.38	340	NA	NA	NA	NA	NA	NA	NA	NA	NA	NA	NA	NA	NA	NA
R046	50151058	R046_748	male	35	non-Severe	2020-01-31	2020-02-16	2020-01-25	2022-02-10	742	748	2	Yes	No	Yes	6	NA	NA	NA	NA	NA	NA	NA	NA	NA	NA	NA	NA	NA	NA	112	71	53	6.51	443	5.5	1.023	negative	negative	negative	negative	negative	negative	negative	negative	negative	0	0	1
R046	50151058	R046_8	male	35	non-Severe	2020-01-31	2020-02-16	2020-01-25	2020-02-01	2	8	NA	NA	NA	NA	NA	NA	NA	NA	NA	Yes	NA	Yes	Yes	Yes	Yes	NA	NA	NA	NA	NA	NA	NA	NA	NA	5.5	1.025	negative	negative	+-	negative	negative	negative	negative	negative	negative	0	2	13
R047	50151059	R047_12	female	55	non-Severe	2020-01-31	2020-03-06	2020-01-28	2020-02-08	9	12	NA	NA	NA	NA	NA	NA	NA	NA	NA	NA	NA	NA	NA	NA	NA	NA	NA	NA	NA	NA	NA	NA	NA	NA	NA	NA	NA	NA	NA	NA	NA	NA	NA	NA	NA	NA	NA	NA
R047	50151059	R047_14	female	55	non-Severe	2020-01-31	2020-03-06	2020-01-28	2020-02-10	11	14	NA	NA	NA	NA	NA	NA	NA	NA	NA	NA	NA	NA	NA	NA	NA	NA	NA	NA	negative	NA	NA	NA	NA	NA	NA	NA	NA	NA	NA	NA	NA	NA	NA	NA	NA	NA	NA	NA
R047	50151059	R047_16	female	55	non-Severe	2020-01-31	2020-03-06	2020-01-28	2020-02-12	13	16	NA	NA	NA	NA	NA	NA	NA	NA	NA	NA	NA	NA	NA	NA	NA	NA	NA	NA	NA	NA	NA	NA	NA	NA	NA	NA	NA	NA	NA	NA	NA	NA	NA	NA	NA	NA	NA	NA
R047	50151059	R047_17	female	55	non-Severe	2020-01-31	2020-03-06	2020-01-28	2020-02-13	14	17	NA	NA	NA	NA	NA	NA	NA	NA	NA	NA	NA	NA	NA	NA	NA	NA	NA	NA	negative	NA	NA	NA	NA	NA	6	1.02	negative	negative	negative	negative	negative	negative	negative	negative	negative	0	2	9
R047	50151059	R047_18	female	55	non-Severe	2020-01-31	2020-03-06	2020-01-28	2020-02-14	15	18	NA	NA	NA	NA	NA	NA	NA	NA	NA	NA	NA	NA	NA	NA	NA	NA	NA	NA	NA	55	102	31.5	3.84	168	NA	NA	NA	NA	NA	NA	NA	NA	NA	NA	NA	NA	NA	NA
R047	50151059	R047_19	female	55	non-Severe	2020-01-31	2020-03-06	2020-01-28	2020-02-15	16	19	NA	NA	NA	NA	NA	NA	NA	NA	NA	NA	NA	NA	NA	NA	NA	NA	NA	NA	NA	NA	NA	NA	NA	NA	NA	NA	NA	NA	NA	NA	NA	NA	NA	NA	NA	NA	NA	NA
R047	50151059	R047_20	female	55	non-Severe	2020-01-31	2020-03-06	2020-01-28	2020-02-16	17	20	NA	NA	NA	NA	NA	NA	NA	NA	NA	NA	NA	NA	NA	NA	NA	NA	NA	negative	negative	NA	NA	NA	NA	NA	NA	NA	NA	NA	NA	NA	NA	NA	NA	NA	NA	NA	NA	NA
R047	50151059	R047_22	female	55	non-Severe	2020-01-31	2020-03-06	2020-01-28	2020-02-18	19	22	1	Yes	No	Yes	5	NA	NA	NA	NA	NA	NA	NA	NA	NA	NA	NA	NA	NA	negative	NA	NA	NA	NA	NA	NA	NA	NA	NA	NA	NA	NA	NA	NA	NA	NA	NA	NA	NA
R047	50151059	R047_23	female	55	non-Severe	2020-01-31	2020-03-06	2020-01-28	2020-02-19	20	23	NA	NA	NA	NA	NA	NA	NA	NA	NA	NA	NA	NA	NA	NA	NA	NA	positive	NA	negative	NA	NA	NA	NA	NA	NA	NA	NA	NA	NA	NA	NA	NA	NA	NA	NA	NA	NA	NA
R047	50151059	R047_25	female	55	non-Severe	2020-01-31	2020-03-06	2020-01-28	2020-02-21	22	25	NA	NA	NA	NA	NA	NA	NA	NA	NA	NA	NA	NA	NA	NA	NA	NA	positive	NA	NA	NA	NA	NA	NA	NA	NA	NA	NA	NA	NA	NA	NA	NA	NA	NA	NA	NA	NA	NA
R047	50151059	R047_27	female	55	non-Severe	2020-01-31	2020-03-06	2020-01-28	2020-02-23	24	27	NA	NA	NA	NA	NA	NA	NA	NA	NA	NA	NA	NA	NA	NA	NA	NA	NA	NA	NA	57	101	36.1	3.81	190	NA	NA	NA	NA	NA	NA	NA	NA	NA	NA	NA	NA	NA	NA
R047	50151059	R047_28	female	55	non-Severe	2020-01-31	2020-03-06	2020-01-28	2020-02-24	25	28	NA	NA	NA	NA	NA	NA	NA	NA	NA	NA	NA	NA	NA	NA	NA	NA	negative	negative	NA	NA	NA	NA	NA	NA	NA	NA	NA	NA	NA	NA	NA	NA	NA	NA	NA	NA	NA	NA
R047	50151059	R047_29	female	55	non-Severe	2020-01-31	2020-03-06	2020-01-28	2020-02-25	26	29	NA	NA	NA	NA	NA	NA	NA	NA	NA	NA	NA	NA	NA	NA	NA	NA	negative	NA	NA	NA	NA	NA	NA	NA	NA	NA	NA	NA	NA	NA	NA	NA	NA	NA	NA	NA	NA	NA
R047	50151059	R047_32	female	55	non-Severe	2020-01-31	2020-03-06	2020-01-28	2020-02-28	29	32	NA	NA	NA	NA	NA	NA	NA	NA	NA	NA	NA	NA	NA	NA	NA	NA	positive	negative	NA	NA	NA	NA	NA	NA	NA	NA	NA	NA	NA	NA	NA	NA	NA	NA	NA	NA	NA	NA
R047	50151059	R047_33	female	55	non-Severe	2020-01-31	2020-03-06	2020-01-28	2020-02-29	30	33	NA	NA	NA	NA	NA	NA	NA	NA	NA	NA	NA	NA	NA	NA	NA	NA	negative	negative	NA	NA	NA	NA	NA	NA	NA	NA	NA	NA	NA	NA	NA	NA	NA	NA	NA	NA	NA	NA
R047	50151059	R047_35	female	55	non-Severe	2020-01-31	2020-03-06	2020-01-28	2020-03-02	32	35	NA	NA	NA	NA	NA	NA	NA	NA	NA	NA	NA	NA	NA	NA	NA	NA	negative	NA	NA	NA	NA	NA	NA	NA	NA	NA	NA	NA	NA	NA	NA	NA	NA	NA	NA	NA	NA	NA
R047	50151059	R047_36	female	55	non-Severe	2020-01-31	2020-03-06	2020-01-28	2020/3/3	33	36	1	Yes	No	Yes	5	NA	NA	NA	NA	NA	NA	NA	NA	NA	NA	NA	negative	NA	NA	NA	NA	NA	NA	NA	NA	NA	NA	NA	NA	NA	NA	NA	NA	NA	NA	NA	NA	NA
R047	50151059	R047_37	female	55	non-Severe	2020-01-31	2020-03-06	2020-01-28	2020-03-04	34	37	NA	NA	NA	NA	NA	NA	NA	NA	NA	NA	NA	NA	NA	NA	NA	NA	negative	NA	NA	62	98	40.8	3.41	239	NA	NA	NA	NA	NA	NA	NA	NA	NA	NA	NA	NA	NA	NA
R047	50151059	R047_39	female	55	non-Severe	2020-01-31	2020-03-06	2020-01-28	2020-03-06	36	39	NA	NA	NA	NA	NA	NA	NA	NA	NA	NA	NA	NA	NA	NA	NA	NA	NA	NA	NA	NA	NA	NA	NA	NA	NA	NA	NA	NA	NA	NA	NA	NA	NA	NA	NA	NA	NA	NA
R047	50151059	R047_4	female	55	non-Severe	2020-01-31	2020-03-06	2020-01-28	2020-01-31	1	4	NA	NA	NA	NA	NA	NA	NA	NA	NA	NA	NA	NA	NA	NA	NA	NA	NA	negative	NA	71	83	30	6.5	217	NA	NA	NA	NA	NA	NA	NA	NA	NA	NA	NA	NA	NA	NA
R047	50151059	R047_5	female	55	non-Severe	2020-01-31	2020-03-06	2020-01-28	2020-02-01	2	5	2	Yes	No	Yes	6	NA	NA	NA	NA	NA	NA	NA	NA	NA	NA	NA	NA	NA	NA	NA	NA	NA	NA	NA	6	1.02	negative	+-	negative	3+	negative	negative	negative	negative	negative	12	8	46
R047	50151059	R047_53	female	55	non-Severe	2020-01-31	2020-03-06	2020-01-28	2020-03-20	50	53	NA	NA	NA	NA	NA	NA	NA	NA	NA	NA	NA	NA	NA	NA	NA	NA	negative	negative	NA	62	98	NA	4.57	243	5	1.025	negative	+-	negative	negative	negative	negative	2+	negative	negative	0	21	113
R047	50151059	R047_67	female	55	non-Severe	2020-01-31	2020-03-06	2020-01-28	2020-04-03	64	67	NA	NA	NA	NA	NA	NA	NA	NA	NA	NA	NA	NA	NA	NA	NA	NA	NA	NA	NA	59	99	34.8	3.74	211	5.5	1.02	negative	negative	negative	negative	negative	negative	negative	negative	negative	0	1	8
R047	50151059	R047_70	female	55	non-Severe	2020-01-31	2020-03-06	2020-01-28	2020-04-06	67	70	NA	NA	NA	NA	NA	NA	NA	NA	NA	NA	NA	NA	NA	NA	NA	NA	negative	negative	NA	NA	NA	NA	NA	NA	NA	NA	NA	NA	NA	NA	NA	NA	NA	NA	NA	NA	NA	NA
R048	50151062	R048_10	male	27	non-Severe	2020-01-31	2020-02-07	2020-01-28	2020-02-06	7	10	NA	NA	NA	NA	NA	NA	NA	NA	NA	NA	NA	NA	NA	NA	NA	NA	NA	NA	NA	NA	NA	NA	NA	NA	NA	NA	NA	NA	NA	NA	NA	NA	NA	NA	NA	NA	NA	NA
R048	50151062	R048_24	male	27	non-Severe	2020-01-31	2020-02-07	2020-01-28	2020-02-20	21	24	NA	NA	NA	NA	NA	NA	NA	NA	NA	NA	NA	NA	NA	NA	NA	NA	NA	negative	negative	71	122	NA	2.95	395	6	1.025	negative	negative	negative	negative	negative	negative	negative	negative	negative	0	1	6
R048	50151062	R048_39	male	27	non-Severe	2020-01-31	2020-02-07	2020-01-28	2020-03-06	36	39	NA	NA	NA	NA	NA	NA	NA	NA	NA	NA	NA	NA	NA	NA	NA	NA	negative	negative	NA	74	120	NA	2.72	350	6	1.02	negative	negative	negative	negative	negative	negative	negative	negative	negative	0	2	11
R048	50151062	R048_4	male	27	non-Severe	2020-01-31	2020-02-07	2020-01-28	2020-01-31	1	4	NA	NA	NA	NA	NA	NA	NA	NA	NA	NA	NA	NA	NA	NA	NA	NA	NA	negative	NA	77	118	24.6	3.49	380	NA	NA	NA	NA	NA	NA	NA	NA	NA	NA	NA	NA	NA	NA
R048	50151062	R048_5	male	27	non-Severe	2020-01-31	2020-02-07	2020-01-28	2020-02-01	2	5	NA	NA	NA	NA	NA	Yes	NA	Yes	NA	Yes	Yes	Yes	NA	Yes	Yes	NA	NA	NA	NA	NA	NA	NA	NA	NA	5.5	1.025	negative	negative	negative	negative	negative	negative	negative	negative	negative	0	2	13
R048	50151062	R048_6	male	27	non-Severe	2020-01-31	2020-02-07	2020-01-28	2020-02-02	3	6	NA	NA	NA	NA	NA	NA	NA	NA	NA	NA	NA	NA	NA	NA	NA	NA	NA	NA	NA	NA	NA	NA	NA	NA	NA	NA	NA	NA	NA	NA	NA	NA	NA	NA	NA	NA	NA	NA
R048	50151062	R048_7	male	27	non-Severe	2020-01-31	2020-02-07	2020-01-28	2020-02-03	4	7	NA	NA	NA	NA	NA	NA	NA	NA	NA	NA	NA	NA	NA	NA	NA	NA	NA	NA	negative	NA	NA	NA	NA	NA	NA	NA	NA	NA	NA	NA	NA	NA	NA	NA	NA	NA	NA	NA
R048	50151062	R048_8	male	27	non-Severe	2020-01-31	2020-02-07	2020-01-28	2020-02-04	5	8	NA	NA	NA	NA	NA	NA	NA	NA	NA	NA	NA	NA	NA	NA	NA	NA	NA	NA	negative	74	120	27.9	2.94	311	NA	NA	NA	NA	NA	NA	NA	NA	NA	NA	NA	NA	NA	NA
R048	50151062	R048_9	male	27	non-Severe	2020-01-31	2020-02-07	2020-01-28	2020-02-05	6	9	2	Yes	No	No	3	NA	NA	NA	NA	NA	NA	NA	NA	NA	NA	NA	NA	negative	NA	NA	NA	NA	NA	NA	NA	NA	NA	NA	NA	NA	NA	NA	NA	NA	NA	NA	NA	NA
R049	50151063	R049_10	male	37	non-Severe	2020-01-31	2020-02-08	2020-01-28	2020-02-06	7	10	0	No	No	No	0	NA	NA	NA	NA	NA	NA	NA	NA	NA	NA	NA	NA	NA	negative	89	95	NA	3.61	295	NA	NA	NA	NA	NA	NA	NA	NA	NA	NA	NA	NA	NA	NA
R049	50151063	R049_102	male	37	non-Severe	2020-01-31	2020-02-08	2020-01-28	2020-05-08	99	102	NA	NA	NA	NA	NA	NA	NA	NA	NA	NA	NA	NA	NA	NA	NA	NA	negative	NA	NA	79	109	NA	2.73	389	6	1.015	negative	+-	negative	negative	negative	negative	negative	negative	negative	0	0	1
R049	50151063	R049_26	male	37	non-Severe	2020-01-31	2020-02-08	2020-01-28	2020-02-22	23	26	NA	NA	NA	NA	NA	NA	NA	NA	NA	NA	NA	NA	NA	NA	NA	NA	negative	negative	NA	80	81	NA	3.05	327	7.5	1.015	negative	+-	negative	negative	negative	negative	negative	negative	negative	NA	0	0
R049	50151063	R049_379	male	37	non-Severe	2020-01-31	2020-02-08	2020-01-28	2021-02-09	376	379	0	No	No	No	0	NA	NA	NA	NA	NA	NA	NA	Yes	NA	NA	NA	negative	NA	negative	64	118	66.9	3.58	374	5.5	1.022	NA	negative	NA	negative	negative	negative	negative	negative	negative	NA	NA	0
R049	50151063	R049_4	male	37	non-Severe	2020-01-31	2020-02-08	2020-01-28	2020-01-31	1	4	NA	NA	NA	NA	NA	NA	NA	NA	NA	NA	NA	NA	NA	NA	NA	NA	NA	positive	NA	83	103	51.8	4.08	328	NA	NA	NA	NA	NA	NA	NA	NA	NA	NA	NA	NA	NA	NA
R049	50151063	R049_5	male	37	non-Severe	2020-01-31	2020-02-08	2020-01-28	2020-02-01	2	5	NA	NA	NA	NA	NA	NA	NA	Yes	NA	Yes	NA	Yes	Yes	Yes	Yes	NA	NA	NA	NA	NA	NA	NA	NA	NA	5.5	1.03	negative	negative	+-	negative	negative	negative	negative	negative	negative	0	3	19
R049	50151063	R049_9	male	37	non-Severe	2020-01-31	2020-02-08	2020-01-28	2020-02-05	6	9	NA	NA	NA	NA	NA	NA	NA	NA	NA	NA	NA	NA	NA	NA	NA	NA	NA	negative	negative	NA	NA	NA	NA	NA	NA	NA	NA	NA	NA	NA	NA	NA	NA	NA	NA	NA	NA	NA
R050	50151064	R050_10	male	46	non-Severe	2020-01-31	2020-02-18	2020-01-24	2020-02-02	3	10	NA	NA	NA	NA	NA	NA	NA	NA	Yes	NA	NA	NA	NA	NA	NA	NA	NA	NA	NA	NA	NA	NA	NA	NA	NA	NA	NA	NA	NA	NA	NA	NA	NA	NA	NA	NA	NA	NA
R050	50151064	R050_12	male	46	non-Severe	2020-01-31	2020-02-18	2020-01-24	2020-02-04	5	12	NA	NA	NA	NA	NA	NA	NA	NA	NA	NA	NA	NA	NA	NA	NA	NA	NA	NA	NA	NA	NA	NA	NA	NA	NA	NA	NA	NA	NA	NA	NA	NA	NA	NA	NA	NA	NA	NA
R050	50151064	R050_130	male	46	non-Severe	2020-01-31	2020-02-18	2020-01-24	2020-06-01	123	130	NA	NA	NA	NA	NA	NA	NA	NA	NA	NA	NA	NA	NA	NA	NA	NA	NA	NA	NA	81	100	NA	4.55	329	7.5	1.02	negative	negative	negative	negative	negative	negative	negative	negative	negative	0	1	5
R050	50151064	R050_18	male	46	non-Severe	2020-01-31	2020-02-18	2020-01-24	2020-02-10	11	18	NA	NA	NA	NA	NA	NA	NA	NA	NA	NA	NA	NA	NA	NA	NA	NA	NA	NA	negative	NA	NA	NA	NA	NA	NA	NA	NA	NA	NA	NA	NA	NA	NA	NA	NA	NA	NA	NA
R050	50151064	R050_19	male	46	non-Severe	2020-01-31	2020-02-18	2020-01-24	2020-02-11	12	19	2	Yes	Yes	Yes	8	NA	NA	NA	Yes	NA	NA	NA	NA	NA	NA	NA	NA	NA	negative	86	93	NA	3.6	246	NA	NA	NA	NA	NA	NA	NA	NA	NA	NA	NA	NA	NA	NA
R050	50151064	R050_21	male	46	non-Severe	2020-01-31	2020-02-18	2020-01-24	2020-02-13	14	21	NA	NA	NA	NA	NA	NA	NA	NA	NA	NA	NA	NA	NA	NA	NA	NA	NA	NA	NA	NA	NA	NA	NA	NA	NA	NA	NA	NA	NA	NA	NA	NA	NA	NA	NA	NA	NA	NA
R050	50151064	R050_24	male	46	non-Severe	2020-01-31	2020-02-18	2020-01-24	2020-02-16	17	24	NA	NA	NA	NA	NA	NA	NA	NA	NA	NA	NA	NA	NA	NA	NA	NA	NA	negative	NA	NA	NA	NA	NA	NA	NA	NA	NA	NA	NA	NA	NA	NA	NA	NA	NA	NA	NA	NA
R050	50151064	R050_25	male	46	non-Severe	2020-01-31	2020-02-18	2020-01-24	2020-02-17	18	25	NA	NA	NA	NA	NA	NA	NA	NA	NA	NA	NA	NA	NA	NA	NA	NA	NA	negative	NA	NA	NA	NA	NA	NA	NA	NA	NA	NA	NA	NA	NA	NA	NA	NA	NA	NA	NA	NA
R050	50151064	R050_26	male	46	non-Severe	2020-01-31	2020-02-18	2020-01-24	2020-02-18	19	26	NA	NA	NA	NA	NA	NA	NA	NA	Yes	NA	NA	NA	NA	NA	NA	NA	NA	NA	NA	NA	NA	NA	NA	NA	NA	NA	NA	NA	NA	NA	NA	NA	NA	NA	NA	NA	NA	NA
R050	50151064	R050_40	male	46	non-Severe	2020-01-31	2020-02-18	2020-01-24	2020-03-03	33	40	NA	NA	NA	NA	NA	NA	NA	NA	NA	NA	NA	NA	NA	NA	NA	NA	negative	negative	NA	88	90	NA	3.55	303	7	1.02	negative	negative	negative	negative	negative	negative	negative	negative	negative	0	1	3
R050	50151064	R050_410	male	46	non-Severe	2020-01-31	2020-02-18	2020-01-24	2021-03-08	403	410	0	No	No	No	0	NA	NA	NA	NA	NA	NA	NA	NA	NA	NA	NA	NA	NA	NA	NA	125	NA	NA	NA	NA	NA	NA	NA	NA	NA	NA	NA	NA	NA	NA	NA	NA	NA
R050	50151064	R050_54	male	46	non-Severe	2020-01-31	2020-02-18	2020-01-24	2020-03-17	47	54	NA	NA	NA	NA	NA	NA	NA	NA	NA	NA	NA	NA	NA	NA	NA	NA	negative	negative	NA	95	82	NA	4.38	385	5.5	1.02	negative	negative	negative	negative	negative	negative	negative	negative	negative	0	0	2
R050	50151064	R050_749	male	46	non-Severe	2020-01-31	2020-02-18	2020-01-24	2022-02-10	742	749	0	No	No	No	0	NA	NA	NA	NA	NA	NA	NA	NA	NA	NA	NA	NA	NA	NA	80	100	51.1	4.63	302	7.5	1.019	negative	negative	negative	negative	negative	negative	negative	negative	negative	0	0	0
R050	50151064	R050_8	male	46	non-Severe	2020-01-31	2020-02-18	2020-01-24	2020-01-31	1	8	NA	NA	NA	NA	NA	NA	NA	NA	Yes	NA	NA	NA	NA	NA	NA	NA	NA	positive	NA	88	90	33.9	3.31	296	NA	NA	NA	NA	NA	NA	NA	NA	NA	NA	NA	NA	NA	NA
R050	50151064	R050_9	male	46	non-Severe	2020-01-31	2020-02-18	2020-01-24	2020-02-01	2	9	NA	NA	NA	NA	NA	NA	NA	Yes	NA	Yes	NA	Yes	NA	Yes	Yes	NA	NA	NA	NA	NA	NA	NA	NA	NA	6	1.025	negative	negative	+-	negative	negative	negative	negative	negative	negative	0	2	12
R051	50151065	R051_13	male	51	non-Severe	2020-01-31	2020-03-08	2020-01-19	2020-01-31	1	13	NA	NA	NA	NA	NA	NA	NA	NA	NA	NA	NA	NA	NA	NA	NA	NA	NA	positive	NA	69	104	41.5	3.24	316	NA	NA	NA	NA	NA	NA	NA	NA	NA	NA	NA	NA	NA	NA
R051	50151065	R051_14	male	51	non-Severe	2020-01-31	2020-03-08	2020-01-19	2020-02-01	2	14	NA	NA	NA	NA	NA	NA	NA	NA	NA	Yes	NA	Yes	Yes	NA	Yes	NA	NA	NA	NA	NA	NA	NA	NA	NA	5	1.025	negative	negative	negative	negative	negative	negative	negative	negative	negative	0	3	16
R051	50151065	R051_143	male	51	non-Severe	2020-01-31	2020-03-08	2020-01-19	2020-06-09	131	143	NA	NA	NA	NA	NA	NA	NA	NA	NA	NA	NA	NA	NA	NA	NA	NA	negative	NA	NA	NA	NA	NA	NA	NA	NA	NA	NA	NA	NA	NA	NA	NA	NA	NA	NA	NA	NA	NA
R051	50151065	R051_15	male	51	non-Severe	2020-01-31	2020-03-08	2020-01-19	2020-02-02	3	15	NA	NA	NA	NA	NA	NA	NA	NA	NA	NA	NA	NA	NA	NA	NA	NA	NA	NA	NA	NA	NA	NA	NA	NA	NA	NA	NA	NA	NA	NA	NA	NA	NA	NA	NA	NA	NA	NA
R051	50151065	R051_18	male	51	non-Severe	2020-01-31	2020-03-08	2020-01-19	2020-02-05	6	18	NA	NA	NA	NA	NA	NA	NA	NA	Yes	NA	NA	NA	NA	NA	NA	NA	NA	NA	positive	NA	NA	NA	NA	NA	NA	NA	NA	NA	NA	NA	NA	NA	NA	NA	NA	NA	NA	NA
R051	50151065	R051_23	male	51	non-Severe	2020-01-31	2020-03-08	2020-01-19	2020/2/10	11	23	1	Yes	No	No	2	NA	NA	NA	NA	NA	NA	NA	NA	NA	NA	NA	NA	NA	NA	NA	NA	NA	NA	NA	NA	NA	NA	NA	NA	NA	NA	NA	NA	NA	NA	NA	NA	NA
R051	50151065	R051_24	male	51	non-Severe	2020-01-31	2020-03-08	2020-01-19	2020/2/11	12	24	NA	NA	NA	NA	NA	NA	NA	NA	Yes	NA	NA	NA	NA	NA	NA	NA	NA	NA	NA	NA	NA	NA	NA	NA	NA	NA	NA	NA	NA	NA	NA	NA	NA	NA	NA	NA	NA	NA
R051	50151065	R051_25	male	51	non-Severe	2020-01-31	2020-03-08	2020-01-19	2020-02-12	13	25	NA	NA	NA	NA	NA	NA	NA	NA	NA	NA	NA	NA	NA	NA	NA	NA	NA	NA	negative	85	91	NA	3.17	391	NA	NA	NA	NA	NA	NA	NA	NA	NA	NA	NA	NA	NA	NA
R051	50151065	R051_26	male	51	non-Severe	2020-01-31	2020-03-08	2020-01-19	2020-02-13	14	26	NA	NA	NA	NA	NA	NA	NA	NA	NA	NA	NA	NA	NA	NA	NA	NA	NA	NA	negative	NA	NA	NA	NA	NA	NA	NA	NA	NA	NA	NA	NA	NA	NA	NA	NA	NA	NA	NA
R051	50151065	R051_27	male	51	non-Severe	2020-01-31	2020-03-08	2020-01-19	2020-02-14	15	27	NA	NA	NA	NA	NA	NA	NA	NA	NA	NA	NA	NA	NA	NA	NA	NA	NA	NA	NA	NA	NA	NA	NA	NA	NA	NA	NA	NA	NA	NA	NA	NA	NA	NA	NA	NA	NA	NA
R051	50151065	R051_30	male	51	non-Severe	2020-01-31	2020-03-08	2020-01-19	2020-02-17	18	30	NA	NA	NA	NA	NA	NA	NA	NA	NA	NA	NA	NA	NA	NA	NA	NA	NA	NA	negative	NA	NA	NA	NA	NA	NA	NA	NA	NA	NA	NA	NA	NA	NA	NA	NA	NA	NA	NA
R051	50151065	R051_31	male	51	non-Severe	2020-01-31	2020-03-08	2020-01-19	2020-02-18	19	31	NA	NA	NA	NA	NA	NA	NA	NA	NA	NA	NA	NA	NA	NA	NA	NA	NA	negative	negative	74	102	28.7	3.24	286	NA	NA	NA	NA	NA	NA	NA	NA	NA	NA	NA	NA	NA	NA
R051	50151065	R051_32	male	51	non-Severe	2020-01-31	2020-03-08	2020-01-19	2020-02-19	20	32	NA	NA	NA	NA	NA	NA	NA	NA	NA	NA	NA	NA	NA	NA	NA	NA	NA	NA	NA	NA	NA	NA	NA	NA	NA	NA	NA	NA	NA	NA	NA	NA	NA	NA	NA	NA	NA	NA
R051	50151065	R051_33	male	51	non-Severe	2020-01-31	2020-03-08	2020-01-19	2020-02-20	21	33	NA	NA	NA	NA	NA	NA	NA	NA	NA	NA	NA	NA	NA	NA	NA	NA	positive	NA	negative	NA	NA	NA	NA	NA	NA	NA	NA	NA	NA	NA	NA	NA	NA	NA	NA	NA	NA	NA
R051	50151065	R051_34	male	51	non-Severe	2020-01-31	2020-03-08	2020-01-19	2020/2/21	22	34	NA	NA	NA	NA	NA	NA	NA	NA	Yes	NA	NA	NA	NA	NA	NA	NA	NA	NA	NA	NA	NA	NA	NA	NA	NA	NA	NA	NA	NA	NA	NA	NA	NA	NA	NA	NA	NA	NA
R051	50151065	R051_35	male	51	non-Severe	2020-01-31	2020-03-08	2020-01-19	2020-02-22	23	35	NA	NA	NA	NA	NA	NA	NA	NA	NA	NA	NA	NA	NA	NA	NA	NA	positive	NA	NA	NA	NA	NA	NA	NA	NA	NA	NA	NA	NA	NA	NA	NA	NA	NA	NA	NA	NA	NA
R051	50151065	R051_37	male	51	non-Severe	2020-01-31	2020-03-08	2020-01-19	2020-02-24	25	37	NA	NA	NA	NA	NA	NA	NA	NA	NA	NA	NA	NA	NA	NA	NA	NA	negative	negative	NA	NA	NA	NA	NA	NA	NA	NA	NA	NA	NA	NA	NA	NA	NA	NA	NA	NA	NA	NA
R051	50151065	R051_387	male	51	non-Severe	2020-01-31	2020-03-08	2020-01-19	2021-02-08	375	387	0	No	No	No	0	NA	Yes	NA	NA	NA	NA	NA	Yes	NA	NA	NA	NA	NA	negative	62	108	46.7	5.42	370	5	1.026	NA	negative	NA	negative	negative	negative	negative	negative	negative	NA	NA	0
R051	50151065	R051_40	male	51	non-Severe	2020-01-31	2020-03-08	2020-01-19	2020-02-27	28	40	NA	NA	NA	NA	NA	NA	NA	NA	NA	NA	NA	NA	NA	NA	NA	NA	positive	negative	NA	NA	NA	NA	NA	NA	NA	NA	NA	NA	NA	NA	NA	NA	NA	NA	NA	NA	NA	NA
R051	50151065	R051_41	male	51	non-Severe	2020-01-31	2020-03-08	2020-01-19	2020-02-28	29	41	NA	NA	NA	NA	NA	NA	Yes	NA	Yes	NA	NA	NA	NA	NA	NA	NA	NA	NA	NA	73	102	36	3.57	318	NA	NA	NA	NA	NA	NA	NA	NA	NA	NA	NA	NA	NA	NA
R051	50151065	R051_43	male	51	non-Severe	2020-01-31	2020-03-08	2020-01-19	2020-03-01	31	43	NA	NA	NA	NA	NA	NA	NA	NA	NA	NA	NA	NA	NA	NA	NA	NA	positive	negative	NA	NA	NA	NA	NA	NA	NA	NA	NA	NA	NA	NA	NA	NA	NA	NA	NA	NA	NA	NA
R051	50151065	R051_46	male	51	non-Severe	2020-01-31	2020-03-08	2020-01-19	2020-03-04	34	46	NA	NA	NA	NA	NA	NA	NA	NA	NA	NA	NA	NA	NA	NA	NA	NA	negative	negative	NA	NA	NA	NA	NA	NA	NA	NA	NA	NA	NA	NA	NA	NA	NA	NA	NA	NA	NA	NA
R051	50151065	R051_47	male	51	non-Severe	2020-01-31	2020-03-08	2020-01-19	2020-03-05	35	47	NA	NA	NA	NA	NA	NA	NA	NA	NA	NA	NA	NA	NA	NA	NA	NA	negative	NA	NA	NA	NA	NA	NA	NA	NA	NA	NA	NA	NA	NA	NA	NA	NA	NA	NA	NA	NA	NA
R051	50151065	R051_48	male	51	non-Severe	2020-01-31	2020-03-08	2020-01-19	2020-03-06	36	48	1	Yes	No	No	2	NA	NA	NA	NA	NA	NA	NA	NA	NA	NA	NA	NA	NA	NA	79	99	44.8	4.12	317	NA	NA	NA	NA	NA	NA	NA	NA	NA	NA	NA	NA	NA	NA
R051	50151065	R051_51	male	51	non-Severe	2020-01-31	2020-03-08	2020-01-19	2020-03-09	39	51	NA	NA	NA	NA	NA	NA	NA	NA	NA	NA	NA	NA	NA	NA	NA	NA	NA	NA	NA	NA	NA	NA	NA	NA	NA	NA	NA	NA	NA	NA	NA	NA	NA	NA	NA	NA	NA	NA
R051	50151065	R051_6	male	51	non-Severe	2020-01-31	2020-03-08	2020-01-19	2020/1/24	-6	6	NA	NA	NA	NA	NA	NA	Yes	NA	Yes	NA	NA	NA	NA	NA	NA	NA	NA	NA	NA	NA	NA	NA	NA	NA	NA	NA	NA	NA	NA	NA	NA	NA	NA	NA	NA	NA	NA	NA
R051	50151065	R051_7	male	51	non-Severe	2020-01-31	2020-03-08	2020-01-19	2020/1/25	-5	7	NA	NA	NA	NA	NA	NA	NA	NA	NA	NA	NA	NA	NA	Yes	NA	NA	NA	NA	NA	NA	NA	NA	NA	NA	NA	NA	NA	NA	NA	NA	NA	NA	NA	NA	NA	NA	NA	NA
R051	50151065	R051_753	male	51	non-Severe	2020-01-31	2020-03-08	2020-01-19	2022-02-09	741	753	0	No	No	No	0	NA	NA	NA	NA	NA	NA	NA	NA	NA	NA	NA	NA	NA	NA	77	98	47.1	6.1	258	5	1.011	negative	negative	+-	negative	negative	negative	negative	negative	negative	0	0	2
R052	50151066	R052_10	male	43	non-Severe	2020-01-31	2020-02-08	2020-01-26	2020-02-04	5	10	NA	NA	NA	NA	NA	NA	NA	NA	NA	NA	NA	NA	NA	NA	NA	NA	NA	NA	negative	NA	NA	NA	NA	NA	NA	NA	NA	NA	NA	NA	NA	NA	NA	NA	NA	NA	NA	NA
R052	50151066	R052_104	male	43	non-Severe	2020-01-31	2020-02-08	2020-01-26	2020-05-08	99	104	NA	NA	NA	NA	NA	NA	NA	NA	NA	NA	NA	NA	NA	NA	NA	NA	negative	NA	NA	72	109	NA	4.96	510	5.5	1.02	negative	negative	negative	negative	negative	negative	negative	negative	negative	0	1	3
R052	50151066	R052_12	male	43	non-Severe	2020-01-31	2020-02-08	2020-01-26	2020-02-06	7	12	5	Yes	Yes	No	8	NA	NA	NA	NA	NA	NA	NA	NA	NA	NA	NA	NA	NA	negative	72	109	NA	2.99	333	NA	NA	NA	NA	NA	NA	NA	NA	NA	NA	NA	NA	NA	NA
R052	50151066	R052_13	male	43	non-Severe	2020-01-31	2020-02-08	2020-01-26	2020-02-07	8	13	NA	NA	NA	NA	NA	NA	Yes	NA	NA	NA	NA	NA	NA	NA	NA	NA	NA	NA	NA	NA	NA	NA	NA	NA	NA	NA	NA	NA	NA	NA	NA	NA	NA	NA	NA	NA	NA	NA
R052	50151066	R052_28	male	43	non-Severe	2020-01-31	2020-02-08	2020-01-26	2020-02-22	23	28	NA	NA	NA	NA	NA	NA	NA	NA	NA	NA	NA	NA	NA	NA	NA	NA	negative	negative	NA	75	107	NA	3.59	435	6	1.02	negative	negative	negative	negative	negative	negative	negative	negative	negative	NA	0	0
R052	50151066	R052_381	male	43	non-Severe	2020-01-31	2020-02-08	2020-01-26	2021-02-09	376	381	0	No	No	No	0	NA	Yes	NA	NA	NA	NA	NA	Yes	NA	NA	NA	negative	NA	NA	68	110	60.6	5.27	511	5.5	1.017	NA	negative	NA	negative	negative	negative	negative	negative	negative	NA	NA	0
R052	50151066	R052_6	male	43	non-Severe	2020-01-31	2020-02-08	2020-01-26	2020-01-31	1	6	NA	NA	NA	NA	NA	NA	NA	NA	NA	NA	NA	NA	NA	NA	NA	NA	NA	negative	NA	71	109	29	4.49	377	NA	NA	NA	NA	NA	NA	NA	NA	NA	NA	NA	NA	NA	NA
R052	50151066	R052_8	male	43	non-Severe	2020-01-31	2020-02-08	2020-01-26	2020-02-02	3	8	NA	NA	NA	NA	NA	NA	NA	NA	NA	Yes	NA	Yes	Yes	Yes	Yes	NA	NA	NA	NA	NA	NA	NA	NA	NA	5.5	1.02	negative	negative	negative	negative	negative	negative	negative	negative	negative	0	1	3
R052	50151066	R052_9	male	43	non-Severe	2020-01-31	2020-02-08	2020-01-26	2020/2/3	4	9	NA	NA	NA	NA	NA	Yes	Yes	Yes	NA	NA	Yes	NA	NA	NA	NA	NA	NA	NA	NA	NA	NA	NA	NA	NA	NA	NA	NA	NA	NA	NA	NA	NA	NA	NA	NA	NA	NA	NA
R053	50151067	R053_11	female	59	Severe	2020-01-31	2020-02-20	2020-01-21	2020-01-31	1	11	NA	NA	NA	NA	NA	NA	NA	NA	Yes	NA	NA	NA	NA	NA	NA	NA	NA	positive	NA	88	62	31	6.93	479	NA	NA	NA	NA	NA	NA	NA	NA	NA	NA	NA	NA	NA	NA
R053	50151067	R053_12	female	59	Severe	2020-01-31	2020-02-20	2020-01-21	2020-02-01	2	12	5	Yes	Yes	Yes	11	NA	NA	Yes	NA	Yes	NA	Yes	NA	Yes	Yes	NA	NA	NA	NA	NA	NA	NA	NA	NA	NA	NA	NA	NA	NA	NA	NA	NA	NA	NA	NA	NA	NA	NA
R053	50151067	R053_13	female	59	Severe	2020-01-31	2020-02-20	2020-01-21	2020-02-02	3	13	NA	NA	NA	NA	NA	Yes	NA	Yes	NA	NA	Yes	NA	NA	NA	NA	NA	NA	NA	NA	NA	NA	NA	NA	NA	NA	NA	NA	NA	NA	NA	NA	NA	NA	NA	NA	NA	NA	NA
R053	50151067	R053_15	female	59	Severe	2020-01-31	2020-02-20	2020-01-21	2020-02-04	5	15	NA	NA	NA	NA	NA	NA	NA	NA	NA	NA	NA	NA	NA	NA	NA	NA	NA	NA	NA	NA	NA	NA	NA	NA	6	1.025	3+	negative	negative	negative	negative	negative	negative	negative	negative	0	2	10
R053	50151067	R053_18	female	59	Severe	2020-01-31	2020-02-20	2020-01-21	2020-02-07	8	18	NA	NA	NA	NA	NA	NA	NA	NA	NA	NA	NA	NA	NA	NA	NA	NA	NA	NA	negative	NA	NA	NA	NA	NA	NA	NA	NA	NA	NA	NA	NA	NA	NA	NA	NA	NA	NA	NA
R053	50151067	R053_19	female	59	Severe	2020-01-31	2020-02-20	2020-01-21	2020-02-08	9	19	5	Yes	Yes	Yes	11	NA	NA	NA	Yes	NA	NA	NA	NA	NA	NA	NA	NA	NA	negative	75	75	NA	6.49	293	NA	NA	NA	NA	NA	NA	NA	NA	NA	NA	NA	NA	NA	NA
R053	50151067	R053_20	female	59	Severe	2020-01-31	2020-02-20	2020-01-21	2020-02-09	10	20	NA	NA	NA	NA	NA	NA	NA	Yes	NA	NA	NA	NA	NA	NA	NA	NA	NA	NA	NA	NA	NA	NA	NA	NA	NA	NA	NA	NA	NA	NA	NA	NA	NA	NA	NA	NA	NA	NA
R053	50151067	R053_21	female	59	Severe	2020-01-31	2020-02-20	2020-01-21	2020-02-10	11	21	NA	NA	NA	NA	NA	NA	NA	NA	Yes	NA	NA	NA	NA	NA	NA	NA	NA	NA	NA	NA	NA	NA	NA	NA	NA	NA	NA	NA	NA	NA	NA	NA	NA	NA	NA	NA	NA	NA
R053	50151067	R053_22	female	59	Severe	2020-01-31	2020-02-20	2020-01-21	2020-02-11	12	22	NA	NA	NA	NA	NA	NA	NA	Yes	Yes	NA	NA	NA	NA	NA	NA	NA	NA	NA	NA	63	93	NA	4.05	235	6	1.02	+-	negative	negative	negative	negative	negative	negative	negative	negative	0	1	5
R053	50151067	R053_24	female	59	Severe	2020-01-31	2020-02-20	2020-01-21	2020-02-13	14	24	NA	NA	NA	NA	NA	NA	NA	Yes	NA	NA	NA	NA	NA	NA	NA	NA	NA	NA	NA	NA	NA	NA	NA	NA	NA	NA	NA	NA	NA	NA	NA	NA	NA	NA	NA	NA	NA	NA
R053	50151067	R053_27	female	59	Severe	2020-01-31	2020-02-20	2020-01-21	2020-02-16	17	27	NA	NA	NA	NA	NA	NA	NA	NA	NA	NA	NA	NA	NA	NA	NA	NA	NA	negative	NA	NA	NA	NA	NA	NA	NA	NA	NA	NA	NA	NA	NA	NA	NA	NA	NA	NA	NA	NA
R053	50151067	R053_28	female	59	Severe	2020-01-31	2020-02-20	2020-01-21	2020-02-17	18	28	5	Yes	No	Yes	9	NA	NA	NA	NA	NA	NA	NA	NA	NA	NA	NA	NA	NA	NA	69	83	44.4	3.69	287	NA	NA	NA	NA	NA	NA	NA	NA	NA	NA	NA	NA	NA	NA
R053	50151067	R053_30	female	59	Severe	2020-01-31	2020-02-20	2020-01-21	2020-02-19	20	30	NA	NA	NA	NA	NA	NA	NA	NA	NA	NA	NA	NA	NA	NA	NA	NA	NA	negative	NA	NA	NA	NA	NA	NA	NA	NA	NA	NA	NA	NA	NA	NA	NA	NA	NA	NA	NA	NA
R053	50151067	R053_31	female	59	Severe	2020-01-31	2020-02-20	2020-01-21	2020-02-20	21	31	NA	NA	NA	NA	NA	NA	NA	NA	NA	NA	NA	NA	NA	NA	NA	NA	NA	NA	NA	NA	NA	NA	NA	NA	NA	NA	NA	NA	NA	NA	NA	NA	NA	NA	NA	NA	NA	NA
R053	50151067	R053_45	female	59	Severe	2020-01-31	2020-02-20	2020-01-21	2020-03-05	35	45	NA	NA	NA	NA	NA	NA	NA	NA	NA	NA	NA	NA	NA	NA	NA	NA	NA	NA	NA	NA	NA	NA	NA	NA	NA	NA	NA	NA	NA	NA	NA	NA	NA	NA	NA	NA	NA	NA
R053	50151067	R053_59	female	59	Severe	2020-01-31	2020-02-20	2020-01-21	2020-03-19	49	59	NA	NA	NA	NA	NA	NA	NA	NA	NA	NA	NA	NA	NA	NA	NA	NA	NA	NA	NA	NA	NA	NA	NA	NA	NA	NA	NA	NA	NA	NA	NA	NA	NA	NA	NA	NA	NA	NA
R053	50151067	R053_751	female	59	Severe	2020-01-31	2020-02-20	2020-01-21	2022-02-09	741	751	2	No	No	Yes	5	NA	NA	NA	NA	NA	NA	NA	NA	NA	NA	NA	NA	NA	NA	64	89	43.9	6.09	340	6.5	1.017	negative	negative	negative	negative	negative	negative	1+	negative	negative	0	5	26
R054	50151068	R054_100	male	60	non-Severe	2020-01-31	2020-02-12	2020-01-28	2020-05-06	97	100	NA	NA	NA	NA	NA	NA	NA	NA	NA	NA	NA	NA	NA	NA	NA	NA	negative	NA	NA	NA	NA	NA	NA	NA	NA	NA	NA	NA	NA	NA	NA	NA	NA	NA	NA	NA	NA	NA
R054	50151068	R054_101	male	60	non-Severe	2020-01-31	2020-02-12	2020-01-28	2020-05-07	98	101	NA	NA	NA	NA	NA	NA	NA	NA	NA	NA	NA	NA	NA	NA	NA	NA	NA	NA	NA	NA	NA	NA	NA	NA	NA	NA	NA	NA	NA	NA	NA	NA	NA	NA	NA	NA	NA	NA
R054	50151068	R054_104	male	60	non-Severe	2020-01-31	2020-02-12	2020-01-28	2020-05-10	101	104	NA	NA	NA	NA	NA	NA	NA	NA	NA	NA	NA	NA	NA	NA	NA	NA	positive	NA	NA	NA	NA	NA	NA	NA	NA	NA	NA	NA	NA	NA	NA	NA	NA	NA	NA	NA	NA	NA
R054	50151068	R054_107	male	60	non-Severe	2020-01-31	2020-02-12	2020-01-28	2020-05-13	104	107	NA	NA	NA	NA	NA	NA	NA	NA	NA	NA	NA	NA	NA	NA	NA	NA	NA	NA	NA	87	83	NA	6.99	339	NA	NA	NA	NA	NA	NA	NA	NA	NA	NA	NA	NA	NA	NA
R054	50151068	R054_108	male	60	non-Severe	2020-01-31	2020-02-12	2020-01-28	2020-05-14	105	108	NA	NA	NA	NA	NA	NA	NA	NA	NA	NA	NA	NA	NA	NA	NA	NA	positive	NA	NA	NA	NA	NA	NA	NA	NA	NA	NA	NA	NA	NA	NA	NA	NA	NA	NA	NA	NA	NA
R054	50151068	R054_11	male	60	non-Severe	2020-01-31	2020-02-12	2020-01-28	2020-02-07	8	11	NA	NA	NA	NA	NA	NA	NA	NA	NA	NA	NA	NA	NA	NA	NA	NA	NA	NA	negative	NA	NA	NA	NA	NA	NA	NA	NA	NA	NA	NA	NA	NA	NA	NA	NA	NA	NA	NA
R054	50151068	R054_110	male	60	non-Severe	2020-01-31	2020-02-12	2020-01-28	2020-05-16	107	110	NA	NA	NA	NA	NA	NA	NA	NA	NA	NA	NA	NA	NA	NA	NA	NA	negative	NA	NA	NA	NA	NA	NA	NA	NA	NA	NA	NA	NA	NA	NA	NA	NA	NA	NA	NA	NA	NA
R054	50151068	R054_112	male	60	non-Severe	2020-01-31	2020-02-12	2020-01-28	2020-05-18	109	112	NA	NA	NA	NA	NA	NA	NA	NA	NA	NA	NA	NA	NA	NA	NA	NA	negative	NA	NA	NA	NA	NA	NA	NA	NA	NA	NA	NA	NA	NA	NA	NA	NA	NA	NA	NA	NA	NA
R054	50151068	R054_113	male	60	non-Severe	2020-01-31	2020-02-12	2020-01-28	2020-05-19	110	113	NA	NA	NA	NA	NA	NA	NA	NA	NA	NA	NA	NA	NA	NA	NA	NA	positive	NA	NA	NA	NA	NA	NA	NA	NA	NA	NA	NA	NA	NA	NA	NA	NA	NA	NA	NA	NA	NA
R054	50151068	R054_118	male	60	non-Severe	2020-01-31	2020-02-12	2020-01-28	2020-05-24	115	118	NA	NA	NA	NA	NA	NA	NA	NA	NA	NA	NA	NA	NA	NA	NA	NA	negative	NA	NA	NA	NA	NA	NA	NA	NA	NA	NA	NA	NA	NA	NA	NA	NA	NA	NA	NA	NA	NA
R054	50151068	R054_12	male	60	non-Severe	2020-01-31	2020-02-12	2020-01-28	2020-02-08	9	12	NA	NA	NA	NA	NA	NA	NA	NA	NA	NA	NA	NA	NA	NA	NA	NA	NA	NA	negative	87	83	NA	5.88	331	NA	NA	NA	NA	NA	NA	NA	NA	NA	NA	NA	NA	NA	NA
R054	50151068	R054_120	male	60	non-Severe	2020-01-31	2020-02-12	2020-01-28	2020-05-26	117	120	NA	NA	NA	NA	NA	NA	NA	NA	NA	NA	NA	NA	NA	NA	NA	NA	positive	NA	NA	NA	NA	NA	NA	NA	NA	NA	NA	NA	NA	NA	NA	NA	NA	NA	NA	NA	NA	NA
R054	50151068	R054_124	male	60	non-Severe	2020-01-31	2020-02-12	2020-01-28	2020-05-30	121	124	NA	NA	NA	NA	NA	NA	NA	NA	NA	NA	NA	NA	NA	NA	NA	NA	positive	NA	NA	NA	NA	NA	NA	NA	NA	NA	NA	NA	NA	NA	NA	NA	NA	NA	NA	NA	NA	NA
R054	50151068	R054_128	male	60	non-Severe	2020-01-31	2020-02-12	2020-01-28	2020-06-03	125	128	NA	NA	NA	NA	NA	NA	NA	NA	NA	NA	NA	NA	NA	NA	NA	NA	negative	NA	NA	NA	NA	NA	NA	NA	NA	NA	NA	NA	NA	NA	NA	NA	NA	NA	NA	NA	NA	NA
R054	50151068	R054_13	male	60	non-Severe	2020-01-31	2020-02-12	2020-01-28	2020-02-09	10	13	NA	NA	NA	NA	NA	NA	NA	NA	NA	NA	NA	NA	NA	NA	NA	NA	NA	NA	NA	NA	NA	NA	NA	NA	NA	NA	NA	NA	NA	NA	NA	NA	NA	NA	NA	NA	NA	NA
R054	50151068	R054_130	male	60	non-Severe	2020-01-31	2020-02-12	2020-01-28	2020-06-05	127	130	NA	NA	NA	NA	NA	NA	NA	NA	NA	NA	NA	NA	NA	NA	NA	NA	positive	NA	NA	NA	NA	NA	NA	NA	NA	NA	NA	NA	NA	NA	NA	NA	NA	NA	NA	NA	NA	NA
R054	50151068	R054_134	male	60	non-Severe	2020-01-31	2020-02-12	2020-01-28	2020-06-09	131	134	NA	NA	NA	NA	NA	NA	NA	NA	NA	NA	NA	NA	NA	NA	NA	NA	negative	NA	NA	NA	NA	NA	NA	NA	NA	NA	NA	NA	NA	NA	NA	NA	NA	NA	NA	NA	NA	NA
R054	50151068	R054_138	male	60	non-Severe	2020-01-31	2020-02-12	2020-01-28	2020-06-13	135	138	NA	NA	NA	NA	NA	NA	NA	NA	NA	NA	NA	NA	NA	NA	NA	NA	negative	NA	NA	NA	NA	NA	NA	NA	NA	NA	NA	NA	NA	NA	NA	NA	NA	NA	NA	NA	NA	NA
R054	50151068	R054_139	male	60	non-Severe	2020-01-31	2020-02-12	2020-01-28	2020-06-14	136	139	NA	NA	NA	NA	NA	NA	NA	NA	NA	NA	NA	NA	NA	NA	NA	NA	negative	NA	NA	NA	NA	NA	NA	NA	NA	NA	NA	NA	NA	NA	NA	NA	NA	NA	NA	NA	NA	NA
R054	50151068	R054_14	male	60	non-Severe	2020-01-31	2020-02-12	2020-01-28	2020/2/10	11	14	2	No	No	Yes	5	NA	NA	NA	NA	NA	NA	NA	NA	NA	NA	NA	negative	negative	NA	NA	NA	NA	NA	NA	NA	NA	NA	NA	NA	NA	NA	NA	NA	NA	NA	NA	NA	NA
R054	50151068	R054_143	male	60	non-Severe	2020-01-31	2020-02-12	2020-01-28	2020-06-18	140	143	NA	NA	NA	NA	NA	NA	NA	NA	NA	NA	NA	NA	NA	NA	NA	NA	negative	NA	NA	NA	NA	NA	NA	NA	NA	NA	NA	NA	NA	NA	NA	NA	NA	NA	NA	NA	NA	NA
R054	50151068	R054_144	male	60	non-Severe	2020-01-31	2020-02-12	2020-01-28	2020-06-19	141	144	NA	NA	NA	NA	NA	NA	NA	NA	NA	NA	NA	NA	NA	NA	NA	NA	negative	NA	NA	NA	NA	NA	NA	NA	NA	NA	NA	NA	NA	NA	NA	NA	NA	NA	NA	NA	NA	NA
R054	50151068	R054_145	male	60	non-Severe	2020-01-31	2020-02-12	2020-01-28	2020-06-20	142	145	NA	NA	NA	NA	NA	NA	NA	NA	NA	NA	NA	NA	NA	NA	NA	NA	negative	NA	NA	NA	NA	NA	NA	NA	NA	NA	NA	NA	NA	NA	NA	NA	NA	NA	NA	NA	NA	NA
R054	50151068	R054_15	male	60	non-Severe	2020-01-31	2020-02-12	2020-01-28	2020-02-11	12	15	NA	NA	NA	NA	NA	NA	NA	NA	NA	NA	NA	NA	NA	NA	NA	NA	NA	negative	NA	NA	NA	NA	NA	NA	NA	NA	NA	NA	NA	NA	NA	NA	NA	NA	NA	NA	NA	NA
R054	50151068	R054_16	male	60	non-Severe	2020-01-31	2020-02-12	2020-01-28	2020-02-12	13	16	NA	NA	NA	NA	NA	NA	NA	NA	NA	NA	NA	NA	NA	NA	NA	NA	NA	NA	NA	NA	NA	NA	NA	NA	NA	NA	NA	NA	NA	NA	NA	NA	NA	NA	NA	NA	NA	NA
R054	50151068	R054_161	male	60	non-Severe	2020-01-31	2020-02-12	2020-01-28	2020-07-06	158	161	NA	NA	NA	NA	NA	NA	NA	NA	NA	NA	NA	NA	NA	NA	NA	NA	negative	NA	NA	87	83	NA	6.58	340	5	1.02	negative	negative	negative	negative	negative	negative	negative	negative	negative	0	5	27
R054	50151068	R054_30	male	60	non-Severe	2020-01-31	2020-02-12	2020-01-28	2020-02-26	27	30	NA	NA	NA	NA	NA	NA	NA	NA	NA	NA	NA	NA	NA	NA	NA	NA	positive	negative	NA	85	85	64.8	6.41	378	5	1.025	negative	negative	negative	negative	negative	negative	negative	negative	negative	NA	0	0
R054	50151068	R054_4	male	60	non-Severe	2020-01-31	2020-02-12	2020-01-28	2020-01-31	1	4	NA	NA	NA	NA	NA	NA	NA	NA	NA	NA	NA	NA	NA	NA	NA	NA	NA	negative	NA	75	95	44.7	8.06	283	NA	NA	NA	NA	NA	NA	NA	NA	NA	NA	NA	NA	NA	NA
R054	50151068	R054_44	male	60	non-Severe	2020-01-31	2020-02-12	2020-01-28	2020-03-11	41	44	NA	NA	NA	NA	NA	NA	NA	NA	NA	NA	NA	NA	NA	NA	NA	NA	positive	NA	NA	89	81	NA	6.82	359	5	1.02	negative	negative	negative	negative	negative	negative	negative	negative	negative	NA	0	0
R054	50151068	R054_5	male	60	non-Severe	2020-01-31	2020-02-12	2020-01-28	2020-02-01	2	5	NA	NA	NA	NA	NA	Yes	NA	Yes	NA	NA	Yes	Yes	NA	Yes	Yes	NA	NA	NA	NA	NA	NA	NA	NA	NA	5	1.03	negative	negative	negative	negative	negative	negative	negative	1+	negative	0	2	11
R054	50151068	R054_50	male	60	non-Severe	2020-01-31	2020-02-12	2020-01-28	2020-03-17	47	50	NA	NA	NA	NA	NA	NA	NA	NA	NA	NA	NA	NA	NA	NA	NA	NA	NA	NA	NA	NA	NA	NA	NA	NA	NA	NA	NA	NA	NA	NA	NA	NA	NA	NA	NA	NA	NA	NA
R054	50151068	R054_51	male	60	non-Severe	2020-01-31	2020-02-12	2020-01-28	2020-03-18	48	51	NA	NA	NA	NA	NA	NA	NA	NA	NA	NA	NA	NA	NA	NA	NA	NA	negative	negative	NA	NA	NA	NA	NA	NA	NA	NA	NA	NA	NA	NA	NA	NA	NA	NA	NA	NA	NA	NA
R054	50151068	R054_58	male	60	non-Severe	2020-01-31	2020-02-12	2020-01-28	2020-03-25	55	58	NA	NA	NA	NA	NA	NA	NA	NA	NA	NA	NA	NA	NA	NA	NA	NA	positive	NA	NA	NA	NA	NA	NA	NA	NA	NA	NA	NA	NA	NA	NA	NA	NA	NA	NA	NA	NA	NA
R054	50151068	R054_6	male	60	non-Severe	2020-01-31	2020-02-12	2020-01-28	2020/2/2	3	6	NA	NA	NA	NA	NA	NA	NA	NA	NA	Yes	NA	NA	NA	NA	NA	NA	NA	NA	NA	NA	NA	NA	NA	NA	NA	NA	NA	NA	NA	NA	NA	NA	NA	NA	NA	NA	NA	NA
R054	50151068	R054_61	male	60	non-Severe	2020-01-31	2020-02-12	2020-01-28	2020-03-28	58	61	NA	NA	NA	NA	NA	NA	NA	NA	NA	NA	NA	NA	NA	NA	NA	NA	negative	NA	NA	NA	NA	NA	NA	NA	NA	NA	NA	NA	NA	NA	NA	NA	NA	NA	NA	NA	NA	NA
R054	50151068	R054_63	male	60	non-Severe	2020-01-31	2020-02-12	2020-01-28	2020-03-30	60	63	NA	NA	NA	NA	NA	NA	NA	NA	NA	NA	NA	NA	NA	NA	NA	NA	negative	NA	NA	NA	NA	NA	NA	NA	NA	NA	NA	NA	NA	NA	NA	NA	NA	NA	NA	NA	NA	NA
R054	50151068	R054_65	male	60	non-Severe	2020-01-31	2020-02-12	2020-01-28	2020-04-01	62	65	NA	NA	NA	NA	NA	NA	NA	NA	NA	NA	NA	NA	NA	NA	NA	NA	negative	NA	NA	NA	NA	NA	NA	NA	NA	NA	NA	NA	NA	NA	NA	NA	NA	NA	NA	NA	NA	NA
R054	50151068	R054_67	male	60	non-Severe	2020-01-31	2020-02-12	2020-01-28	2020-04-03	64	67	NA	NA	NA	NA	NA	NA	NA	NA	NA	NA	NA	NA	NA	NA	NA	NA	negative	NA	NA	NA	NA	NA	NA	NA	NA	NA	NA	NA	NA	NA	NA	NA	NA	NA	NA	NA	NA	NA
R054	50151068	R054_77	male	60	non-Severe	2020-01-31	2020-02-12	2020-01-28	2020-04-13	74	77	NA	NA	NA	NA	NA	NA	NA	NA	NA	NA	NA	NA	NA	NA	NA	NA	negative	negative	NA	NA	NA	NA	NA	NA	NA	NA	NA	NA	NA	NA	NA	NA	NA	NA	NA	NA	NA	NA
R054	50151068	R054_79	male	60	non-Severe	2020-01-31	2020-02-12	2020-01-28	2020-04-15	76	79	NA	NA	NA	NA	NA	NA	NA	NA	NA	NA	NA	NA	NA	NA	NA	NA	NA	NA	NA	91	79	42.3	6.36	354	5	1.03	negative	negative	negative	negative	negative	negative	negative	negative	negative	0	0	2
R054	50151068	R054_82	male	60	non-Severe	2020-01-31	2020-02-12	2020-01-28	2020-04-18	79	82	NA	NA	NA	NA	NA	NA	NA	NA	NA	NA	NA	NA	NA	NA	NA	NA	positive	NA	NA	NA	NA	NA	NA	NA	NA	NA	NA	NA	NA	NA	NA	NA	NA	NA	NA	NA	NA	NA
R054	50151068	R054_86	male	60	non-Severe	2020-01-31	2020-02-12	2020-01-28	2020-04-22	83	86	NA	NA	NA	NA	NA	NA	NA	NA	NA	NA	NA	NA	NA	NA	NA	NA	negative	NA	NA	NA	NA	NA	NA	NA	NA	NA	NA	NA	NA	NA	NA	NA	NA	NA	NA	NA	NA	NA
R054	50151068	R054_87	male	60	non-Severe	2020-01-31	2020-02-12	2020-01-28	2020-04-23	84	87	NA	NA	NA	NA	NA	NA	NA	NA	NA	NA	NA	NA	NA	NA	NA	NA	negative	NA	NA	NA	NA	NA	NA	NA	NA	NA	NA	NA	NA	NA	NA	NA	NA	NA	NA	NA	NA	NA
R054	50151068	R054_89	male	60	non-Severe	2020-01-31	2020-02-12	2020-01-28	2020-04-25	86	89	NA	NA	NA	NA	NA	NA	NA	NA	NA	NA	NA	NA	NA	NA	NA	NA	positive	NA	NA	NA	NA	NA	NA	NA	NA	NA	NA	NA	NA	NA	NA	NA	NA	NA	NA	NA	NA	NA
R054	50151068	R054_93	male	60	non-Severe	2020-01-31	2020-02-12	2020-01-28	2020-04-29	90	93	NA	NA	NA	NA	NA	NA	NA	NA	NA	NA	NA	NA	NA	NA	NA	NA	negative	NA	NA	NA	NA	NA	NA	NA	NA	NA	NA	NA	NA	NA	NA	NA	NA	NA	NA	NA	NA	NA
R054	50151068	R054_95	male	60	non-Severe	2020-01-31	2020-02-12	2020-01-28	2020-05-01	92	95	NA	NA	NA	NA	NA	NA	NA	NA	NA	NA	NA	NA	NA	NA	NA	NA	positive	NA	NA	NA	NA	NA	NA	NA	NA	NA	NA	NA	NA	NA	NA	NA	NA	NA	NA	NA	NA	NA
R055	50151088	R055_1	male	55	non-Severe	2020-01-31	2020-03-11	2020-01-31	2020-01-31	1	1	0	No	No	No	0	NA	NA	NA	NA	NA	NA	NA	NA	NA	NA	NA	NA	NA	positive	66	103	50.4	5.08	283	NA	NA	NA	NA	NA	NA	NA	NA	NA	NA	NA	NA	NA	NA
R055	50151088	R055_101	male	55	non-Severe	2020-01-31	2020-03-11	2020-01-31	2020-05-10	101	101	NA	NA	NA	NA	NA	NA	NA	NA	NA	NA	NA	NA	NA	NA	NA	NA	positive	NA	NA	NA	NA	NA	NA	NA	NA	NA	NA	NA	NA	NA	NA	NA	NA	NA	NA	NA	NA	NA
R055	50151088	R055_104	male	55	non-Severe	2020-01-31	2020-03-11	2020-01-31	2020-05-13	104	104	NA	NA	NA	NA	NA	NA	NA	NA	NA	NA	NA	NA	NA	NA	NA	NA	NA	NA	NA	71	100	NA	3.58	290	NA	NA	NA	NA	NA	NA	NA	NA	NA	NA	NA	NA	NA	NA
R055	50151088	R055_105	male	55	non-Severe	2020-01-31	2020-03-11	2020-01-31	2020-05-14	105	105	NA	NA	NA	NA	NA	NA	NA	NA	NA	NA	NA	NA	NA	NA	NA	NA	negative	NA	NA	NA	NA	NA	NA	NA	NA	NA	NA	NA	NA	NA	NA	NA	NA	NA	NA	NA	NA	NA
R055	50151088	R055_107	male	55	non-Severe	2020-01-31	2020-03-11	2020-01-31	2020-05-16	107	107	NA	NA	NA	NA	NA	NA	NA	NA	NA	NA	NA	NA	NA	NA	NA	NA	positive	NA	NA	NA	NA	NA	NA	NA	NA	NA	NA	NA	NA	NA	NA	NA	NA	NA	NA	NA	NA	NA
R055	50151088	R055_110	male	55	non-Severe	2020-01-31	2020-03-11	2020-01-31	2020-05-19	110	110	NA	NA	NA	NA	NA	NA	NA	NA	NA	NA	NA	NA	NA	NA	NA	NA	positive	NA	NA	NA	NA	NA	NA	NA	NA	NA	NA	NA	NA	NA	NA	NA	NA	NA	NA	NA	NA	NA
R055	50151088	R055_114	male	55	non-Severe	2020-01-31	2020-03-11	2020-01-31	2020-05-23	114	114	NA	NA	NA	NA	NA	NA	NA	NA	NA	NA	NA	NA	NA	NA	NA	NA	positive	NA	NA	NA	NA	NA	NA	NA	NA	NA	NA	NA	NA	NA	NA	NA	NA	NA	NA	NA	NA	NA
R055	50151088	R055_116	male	55	non-Severe	2020-01-31	2020-03-11	2020-01-31	2020-05-25	116	116	NA	NA	NA	NA	NA	NA	NA	NA	NA	NA	NA	NA	NA	NA	NA	NA	negative	NA	NA	NA	NA	NA	NA	NA	NA	NA	NA	NA	NA	NA	NA	NA	NA	NA	NA	NA	NA	NA
R055	50151088	R055_118	male	55	non-Severe	2020-01-31	2020-03-11	2020-01-31	2020-05-27	118	118	NA	NA	NA	NA	NA	NA	NA	NA	NA	NA	NA	NA	NA	NA	NA	NA	negative	NA	NA	NA	NA	NA	NA	NA	NA	NA	NA	NA	NA	NA	NA	NA	NA	NA	NA	NA	NA	NA
R055	50151088	R055_119	male	55	non-Severe	2020-01-31	2020-03-11	2020-01-31	2020-05-28	119	119	NA	NA	NA	NA	NA	NA	NA	NA	NA	NA	NA	NA	NA	NA	NA	NA	negative	NA	NA	NA	NA	NA	NA	NA	NA	NA	NA	NA	NA	NA	NA	NA	NA	NA	NA	NA	NA	NA
R055	50151088	R055_13	male	55	non-Severe	2020-01-31	2020-03-11	2020-01-31	2020-02-12	13	13	NA	NA	NA	NA	NA	NA	NA	NA	Yes	NA	NA	NA	NA	NA	NA	NA	NA	NA	NA	78	97	NA	4.42	333	NA	NA	NA	NA	NA	NA	NA	NA	NA	NA	NA	NA	NA	NA
R055	50151088	R055_136	male	55	non-Severe	2020-01-31	2020-03-11	2020-01-31	2020-06-14	136	136	NA	NA	NA	NA	NA	NA	NA	NA	NA	NA	NA	NA	NA	NA	NA	NA	positive	negative	NA	72	100	NA	7.13	314	5	1.025	negative	negative	negative	negative	negative	negative	negative	negative	negative	0	2	11
R055	50151088	R055_137	male	55	non-Severe	2020-01-31	2020-03-11	2020-01-31	2020-06-15	137	137	NA	NA	NA	NA	NA	NA	NA	NA	NA	NA	NA	NA	NA	NA	NA	NA	NA	NA	NA	70	101	NA	7.49	259	5	1.03	negative	+-	negative	negative	negative	negative	negative	negative	negative	0	3	19
R055	50151088	R055_140	male	55	non-Severe	2020-01-31	2020-03-11	2020-01-31	2020-06-18	140	140	NA	NA	NA	NA	NA	NA	NA	NA	NA	NA	NA	NA	NA	NA	NA	NA	positive	NA	NA	NA	NA	NA	NA	NA	NA	NA	NA	NA	NA	NA	NA	NA	NA	NA	NA	NA	NA	NA
R055	50151088	R055_144	male	55	non-Severe	2020-01-31	2020-03-11	2020-01-31	2020-06-22	144	144	NA	NA	NA	NA	NA	NA	NA	NA	NA	NA	NA	NA	NA	NA	NA	NA	positive	NA	NA	NA	NA	NA	NA	NA	NA	NA	NA	NA	NA	NA	NA	NA	NA	NA	NA	NA	NA	NA
R055	50151088	R055_147	male	55	non-Severe	2020-01-31	2020-03-11	2020-01-31	2020-06-25	147	147	NA	NA	NA	NA	NA	NA	NA	NA	NA	NA	NA	NA	NA	NA	NA	NA	positive	NA	NA	NA	NA	NA	NA	NA	NA	NA	NA	NA	NA	NA	NA	NA	NA	NA	NA	NA	NA	NA
R055	50151088	R055_15	male	55	non-Severe	2020-01-31	2020-03-11	2020-01-31	2020-02-14	15	15	NA	NA	NA	NA	NA	NA	NA	Yes	NA	NA	NA	NA	NA	NA	NA	NA	NA	NA	positive	NA	NA	NA	NA	NA	NA	NA	NA	NA	NA	NA	NA	NA	NA	NA	NA	NA	NA	NA
R055	50151088	R055_150	male	55	non-Severe	2020-01-31	2020-03-11	2020-01-31	2020-06-28	150	150	NA	NA	NA	NA	NA	NA	NA	NA	NA	NA	NA	NA	NA	NA	NA	NA	negative	NA	NA	NA	NA	NA	NA	NA	NA	NA	NA	NA	NA	NA	NA	NA	NA	NA	NA	NA	NA	NA
R055	50151088	R055_151	male	55	non-Severe	2020-01-31	2020-03-11	2020-01-31	2020-06-29	151	151	NA	NA	NA	NA	NA	NA	NA	NA	NA	NA	NA	NA	NA	NA	NA	NA	positive	NA	NA	NA	NA	NA	NA	NA	NA	NA	NA	NA	NA	NA	NA	NA	NA	NA	NA	NA	NA	NA
R055	50151088	R055_154	male	55	non-Severe	2020-01-31	2020-03-11	2020-01-31	2020-07-02	154	154	NA	NA	NA	NA	NA	NA	NA	NA	NA	NA	NA	NA	NA	NA	NA	NA	positive	NA	NA	NA	NA	NA	NA	NA	NA	NA	NA	NA	NA	NA	NA	NA	NA	NA	NA	NA	NA	NA
R055	50151088	R055_157	male	55	non-Severe	2020-01-31	2020-03-11	2020-01-31	2020-07-05	157	157	NA	NA	NA	NA	NA	NA	NA	NA	NA	NA	NA	NA	NA	NA	NA	NA	positive	NA	NA	NA	NA	NA	NA	NA	NA	NA	NA	NA	NA	NA	NA	NA	NA	NA	NA	NA	NA	NA
R055	50151088	R055_158	male	55	non-Severe	2020-01-31	2020-03-11	2020-01-31	2020-07-06	158	158	NA	NA	NA	NA	NA	NA	NA	NA	NA	NA	NA	NA	NA	NA	NA	NA	NA	NA	NA	55	112	NA	6.33	304	NA	NA	NA	NA	NA	NA	NA	NA	NA	NA	NA	NA	NA	NA
R055	50151088	R055_160	male	55	non-Severe	2020-01-31	2020-03-11	2020-01-31	2020-07-08	160	160	NA	NA	NA	NA	NA	NA	NA	NA	NA	NA	NA	NA	NA	NA	NA	NA	positive	NA	NA	NA	NA	NA	NA	NA	NA	NA	NA	NA	NA	NA	NA	NA	NA	NA	NA	NA	NA	NA
R055	50151088	R055_163	male	55	non-Severe	2020-01-31	2020-03-11	2020-01-31	2020-07-11	163	163	NA	NA	NA	NA	NA	NA	NA	NA	NA	NA	NA	NA	NA	NA	NA	NA	negative	NA	NA	NA	NA	NA	NA	NA	NA	NA	NA	NA	NA	NA	NA	NA	NA	NA	NA	NA	NA	NA
R055	50151088	R055_164	male	55	non-Severe	2020-01-31	2020-03-11	2020-01-31	2020-07-12	164	164	NA	NA	NA	NA	NA	NA	NA	NA	NA	NA	NA	NA	NA	NA	NA	NA	positive	NA	NA	NA	NA	NA	NA	NA	NA	NA	NA	NA	NA	NA	NA	NA	NA	NA	NA	NA	NA	NA
R055	50151088	R055_167	male	55	non-Severe	2020-01-31	2020-03-11	2020-01-31	2020-07-15	167	167	NA	NA	NA	NA	NA	NA	NA	NA	NA	NA	NA	NA	NA	NA	NA	NA	positive	NA	NA	NA	NA	NA	NA	NA	NA	NA	NA	NA	NA	NA	NA	NA	NA	NA	NA	NA	NA	NA
R055	50151088	R055_171	male	55	non-Severe	2020-01-31	2020-03-11	2020-01-31	2020-07-19	171	171	NA	NA	NA	NA	NA	NA	NA	NA	NA	NA	NA	NA	NA	NA	NA	NA	positive	NA	NA	NA	NA	NA	NA	NA	NA	NA	NA	NA	NA	NA	NA	NA	NA	NA	NA	NA	NA	NA
R055	50151088	R055_174	male	55	non-Severe	2020-01-31	2020-03-11	2020-01-31	2020-07-22	174	174	NA	NA	NA	NA	NA	NA	NA	NA	NA	NA	NA	NA	NA	NA	NA	NA	negative	NA	NA	NA	NA	NA	NA	NA	NA	NA	NA	NA	NA	NA	NA	NA	NA	NA	NA	NA	NA	NA
R055	50151088	R055_175	male	55	non-Severe	2020-01-31	2020-03-11	2020-01-31	2020-07-23	175	175	NA	NA	NA	NA	NA	NA	NA	NA	NA	NA	NA	NA	NA	NA	NA	NA	negative	NA	NA	NA	NA	NA	NA	NA	NA	NA	NA	NA	NA	NA	NA	NA	NA	NA	NA	NA	NA	NA
R055	50151088	R055_176	male	55	non-Severe	2020-01-31	2020-03-11	2020-01-31	2020-07-24	176	176	NA	NA	NA	NA	NA	NA	NA	NA	NA	NA	NA	NA	NA	NA	NA	NA	negative	NA	NA	NA	NA	NA	NA	NA	NA	NA	NA	NA	NA	NA	NA	NA	NA	NA	NA	NA	NA	NA
R055	50151088	R055_192	male	55	non-Severe	2020-01-31	2020-03-11	2020-01-31	2020-08-09	192	192	NA	NA	NA	NA	NA	NA	NA	NA	NA	NA	NA	NA	NA	NA	NA	NA	negative	negative	NA	62	106	NA	5.61	382	6	1.02	negative	negative	negative	negative	negative	negative	negative	negative	negative	0	2	9
R055	50151088	R055_2	male	55	non-Severe	2020-01-31	2020-03-11	2020-01-31	2020-02-01	2	2	NA	NA	NA	NA	NA	NA	NA	Yes	Yes	Yes	NA	Yes	NA	Yes	Yes	NA	NA	NA	NA	NA	NA	NA	NA	NA	6	1.02	negative	+-	negative	2+	negative	negative	negative	negative	negative	0	2	13
R055	50151088	R055_20	male	55	non-Severe	2020-01-31	2020-03-11	2020-01-31	2020-02-19	20	20	NA	NA	NA	NA	NA	NA	NA	NA	NA	NA	NA	NA	NA	NA	NA	NA	NA	NA	negative	NA	NA	NA	NA	NA	NA	NA	NA	NA	NA	NA	NA	NA	NA	NA	NA	NA	NA	NA
R055	50151088	R055_21	male	55	non-Severe	2020-01-31	2020-03-11	2020-01-31	2020-02-20	21	21	NA	NA	NA	NA	NA	NA	NA	NA	Yes	NA	NA	NA	NA	NA	NA	NA	NA	positive	positive	68	102	NA	4.44	270	NA	NA	NA	NA	NA	NA	NA	NA	NA	NA	NA	NA	NA	NA
R055	50151088	R055_211	male	55	non-Severe	2020-01-31	2020-03-11	2020-01-31	2020-08-28	211	211	NA	NA	NA	NA	NA	NA	NA	NA	NA	NA	NA	NA	NA	NA	NA	NA	negative	negative	NA	60	108	NA	6.76	360	5.5	1.015	negative	negative	negative	negative	negative	negative	negative	negative	negative	0	1	4
R055	50151088	R055_22	male	55	non-Severe	2020-01-31	2020-03-11	2020-01-31	2020-02-21	22	22	NA	NA	NA	NA	NA	NA	NA	Yes	NA	NA	NA	NA	NA	NA	NA	NA	NA	NA	NA	NA	NA	NA	NA	NA	NA	NA	NA	NA	NA	NA	NA	NA	NA	NA	NA	NA	NA	NA
R055	50151088	R055_25	male	55	non-Severe	2020-01-31	2020-03-11	2020-01-31	2020-02-24	25	25	NA	NA	NA	NA	NA	NA	NA	NA	NA	NA	NA	NA	NA	NA	NA	NA	positive	NA	NA	NA	NA	NA	NA	NA	NA	NA	NA	NA	NA	NA	NA	NA	NA	NA	NA	NA	NA	NA
R055	50151088	R055_26	male	55	non-Severe	2020-01-31	2020-03-11	2020-01-31	2020-02-25	26	26	NA	NA	NA	NA	NA	NA	NA	NA	NA	NA	NA	NA	NA	NA	NA	NA	NA	negative	NA	NA	NA	NA	NA	NA	NA	NA	NA	NA	NA	NA	NA	NA	NA	NA	NA	NA	NA	NA
R055	50151088	R055_28	male	55	non-Severe	2020-01-31	2020-03-11	2020-01-31	2020-02-27	28	28	NA	NA	NA	NA	NA	NA	NA	NA	Yes	NA	NA	NA	NA	NA	NA	NA	NA	NA	NA	65	104	NA	4.63	240	NA	NA	NA	NA	NA	NA	NA	NA	NA	NA	NA	NA	NA	NA
R055	50151088	R055_29	male	55	non-Severe	2020-01-31	2020-03-11	2020-01-31	2020-02-28	29	29	NA	NA	NA	NA	NA	NA	NA	Yes	NA	NA	NA	NA	NA	NA	NA	NA	NA	NA	NA	NA	NA	NA	NA	NA	NA	NA	NA	NA	NA	NA	NA	NA	NA	NA	NA	NA	NA	NA
R055	50151088	R055_3	male	55	non-Severe	2020-01-31	2020-03-11	2020-01-31	2020-02-02	3	3	NA	NA	NA	NA	NA	NA	NA	Yes	Yes	NA	NA	NA	NA	NA	NA	NA	NA	NA	NA	NA	NA	NA	NA	NA	NA	NA	NA	NA	NA	NA	NA	NA	NA	NA	NA	NA	NA	NA
R055	50151088	R055_31	male	55	non-Severe	2020-01-31	2020-03-11	2020-01-31	2020-03-01	31	31	NA	NA	NA	NA	NA	NA	NA	NA	NA	NA	NA	NA	NA	NA	NA	NA	positive	negative	NA	NA	NA	NA	NA	NA	NA	NA	NA	NA	NA	NA	NA	NA	NA	NA	NA	NA	NA	NA
R055	50151088	R055_33	male	55	non-Severe	2020-01-31	2020-03-11	2020-01-31	2020-03-03	33	33	0	No	No	No	0	NA	NA	NA	Yes	NA	NA	NA	NA	NA	NA	NA	NA	NA	NA	75	98	NA	4.56	267	NA	NA	NA	NA	NA	NA	NA	NA	NA	NA	NA	NA	NA	NA
R055	50151088	R055_35	male	55	non-Severe	2020-01-31	2020-03-11	2020-01-31	2020-03-05	35	35	NA	NA	NA	NA	NA	NA	NA	Yes	NA	NA	NA	NA	NA	NA	NA	NA	negative	NA	NA	NA	NA	NA	NA	NA	NA	NA	NA	NA	NA	NA	NA	NA	NA	NA	NA	NA	NA	NA
R055	50151088	R055_36	male	55	non-Severe	2020-01-31	2020-03-11	2020-01-31	2020-03-06	36	36	NA	NA	NA	NA	NA	NA	NA	NA	NA	NA	NA	NA	NA	NA	NA	NA	positive	negative	NA	NA	NA	NA	NA	NA	NA	NA	NA	NA	NA	NA	NA	NA	NA	NA	NA	NA	NA	NA
R055	50151088	R055_38	male	55	non-Severe	2020-01-31	2020-03-11	2020-01-31	2020-03-08	38	38	NA	NA	NA	NA	NA	NA	NA	NA	NA	NA	NA	NA	NA	NA	NA	positive	NA	NA	NA	NA	NA	NA	NA	NA	NA	NA	NA	NA	NA	NA	NA	NA	NA	NA	NA	NA	NA	NA
R055	50151088	R055_39	male	55	non-Severe	2020-01-31	2020-03-11	2020-01-31	2020-03-09	39	39	NA	NA	NA	NA	NA	NA	NA	NA	NA	NA	NA	NA	NA	NA	NA	negative	NA	NA	NA	NA	NA	NA	NA	NA	NA	NA	NA	NA	NA	NA	NA	NA	NA	NA	NA	NA	NA	NA
R055	50151088	R055_40	male	55	non-Severe	2020-01-31	2020-03-11	2020-01-31	2020-03-10	40	40	NA	NA	NA	NA	NA	NA	NA	NA	NA	NA	NA	NA	NA	NA	NA	negative	NA	NA	NA	NA	NA	NA	NA	NA	NA	NA	NA	NA	NA	NA	NA	NA	NA	NA	NA	NA	NA	NA
R055	50151088	R055_427	male	55	non-Severe	2020-01-31	2020-03-11	2020-01-31	2021-04-01	427	427	2	No	No	Yes	5	NA	NA	NA	NA	NA	NA	NA	NA	NA	NA	NA	NA	NA	NA	NA	NA	NA	NA	NA	NA	NA	NA	NA	NA	NA	NA	NA	NA	NA	NA	NA	NA	NA
R055	50151088	R055_55	male	55	non-Severe	2020-01-31	2020-03-11	2020-01-31	2020-03-25	55	55	NA	NA	NA	NA	NA	NA	NA	Yes	NA	NA	NA	NA	NA	NA	NA	NA	positive	positive	NA	NA	NA	NA	NA	NA	5.5	1.02	negative	+-	negative	negative	negative	negative	negative	negative	negative	0	2	13
R055	50151088	R055_57	male	55	non-Severe	2020-01-31	2020-03-11	2020-01-31	2020-03-27	57	57	NA	NA	NA	NA	NA	NA	NA	NA	NA	NA	NA	NA	NA	NA	NA	NA	NA	NA	negative	NA	NA	NA	NA	NA	NA	NA	NA	NA	NA	NA	NA	NA	NA	NA	NA	NA	NA	NA
R055	50151088	R055_65	male	55	non-Severe	2020-01-31	2020-03-11	2020-01-31	2020-04-04	65	65	NA	NA	NA	NA	NA	NA	NA	NA	NA	NA	NA	NA	NA	NA	NA	NA	positive	NA	NA	NA	NA	NA	NA	NA	NA	NA	NA	NA	NA	NA	NA	NA	NA	NA	NA	NA	NA	NA
R055	50151088	R055_67	male	55	non-Severe	2020-01-31	2020-03-11	2020-01-31	2020-04-06	67	67	NA	NA	NA	NA	NA	NA	NA	NA	NA	NA	NA	NA	NA	NA	NA	NA	positive	NA	NA	NA	NA	NA	NA	NA	NA	NA	NA	NA	NA	NA	NA	NA	NA	NA	NA	NA	NA	NA
R055	50151088	R055_70	male	55	non-Severe	2020-01-31	2020-03-11	2020-01-31	2020-04-09	70	70	NA	NA	NA	NA	NA	NA	NA	NA	NA	NA	NA	NA	NA	NA	NA	NA	NA	NA	NA	70	101	48.1	4.44	320	NA	NA	NA	NA	NA	NA	NA	NA	NA	NA	NA	NA	NA	NA
R055	50151088	R055_71	male	55	non-Severe	2020-01-31	2020-03-11	2020-01-31	2020-04-10	71	71	NA	NA	NA	NA	NA	NA	NA	NA	NA	NA	NA	NA	NA	NA	NA	NA	NA	NA	NA	NA	NA	NA	NA	NA	5	1.025	negative	+-	negative	negative	negative	negative	negative	negative	negative	0	1	6
R055	50151088	R055_72	male	55	non-Severe	2020-01-31	2020-03-11	2020-01-31	2020-04-11	72	72	NA	NA	NA	NA	NA	NA	NA	NA	NA	NA	NA	NA	NA	NA	NA	NA	negative	NA	NA	NA	NA	NA	NA	NA	NA	NA	NA	NA	NA	NA	NA	NA	NA	NA	NA	NA	NA	NA
R055	50151088	R055_73	male	55	non-Severe	2020-01-31	2020-03-11	2020-01-31	2020-04-12	73	73	NA	NA	NA	NA	NA	NA	NA	NA	NA	NA	NA	NA	NA	NA	NA	NA	positive	NA	NA	NA	NA	NA	NA	NA	NA	NA	NA	NA	NA	NA	NA	NA	NA	NA	NA	NA	NA	NA
R055	50151088	R055_77	male	55	non-Severe	2020-01-31	2020-03-11	2020-01-31	2020-04-16	77	77	NA	NA	NA	NA	NA	NA	NA	NA	NA	NA	NA	NA	NA	NA	NA	NA	positive	NA	NA	NA	NA	NA	NA	NA	NA	NA	NA	NA	NA	NA	NA	NA	NA	NA	NA	NA	NA	NA
R055	50151088	R055_8	male	55	non-Severe	2020-01-31	2020-03-11	2020-01-31	2020-02-07	8	8	NA	NA	NA	NA	NA	NA	NA	NA	NA	NA	NA	NA	NA	NA	NA	NA	NA	NA	negative	NA	NA	NA	NA	NA	NA	NA	NA	NA	NA	NA	NA	NA	NA	NA	NA	NA	NA	NA
R055	50151088	R055_81	male	55	non-Severe	2020-01-31	2020-03-11	2020-01-31	2020-04-20	81	81	NA	NA	NA	NA	NA	NA	NA	NA	NA	NA	NA	NA	NA	NA	NA	NA	positive	NA	NA	NA	NA	NA	NA	NA	NA	NA	NA	NA	NA	NA	NA	NA	NA	NA	NA	NA	NA	NA
R055	50151088	R055_86	male	55	non-Severe	2020-01-31	2020-03-11	2020-01-31	2020-04-25	86	86	NA	NA	NA	NA	NA	NA	NA	NA	NA	NA	NA	NA	NA	NA	NA	NA	positive	NA	NA	NA	NA	NA	NA	NA	NA	NA	NA	NA	NA	NA	NA	NA	NA	NA	NA	NA	NA	NA
R055	50151088	R055_89	male	55	non-Severe	2020-01-31	2020-03-11	2020-01-31	2020-04-28	89	89	NA	NA	NA	NA	NA	NA	NA	NA	NA	NA	NA	NA	NA	NA	NA	NA	positive	NA	NA	NA	NA	NA	NA	NA	NA	NA	NA	NA	NA	NA	NA	NA	NA	NA	NA	NA	NA	NA
R055	50151088	R055_93	male	55	non-Severe	2020-01-31	2020-03-11	2020-01-31	2020-05-02	93	93	NA	NA	NA	NA	NA	NA	NA	NA	NA	NA	NA	NA	NA	NA	NA	NA	positive	NA	NA	NA	NA	NA	NA	NA	NA	NA	NA	NA	NA	NA	NA	NA	NA	NA	NA	NA	NA	NA
R055	50151088	R055_97	male	55	non-Severe	2020-01-31	2020-03-11	2020-01-31	2020-05-06	97	97	NA	NA	NA	NA	NA	NA	NA	NA	NA	NA	NA	NA	NA	NA	NA	NA	positive	NA	NA	NA	NA	NA	NA	NA	NA	NA	NA	NA	NA	NA	NA	NA	NA	NA	NA	NA	NA	NA
R056	50151110	R056_10	female	64	Severe	2020-02-01	2020-02-12	2020-01-24	2020-02-02	2	10	5	Yes	Yes	No	8	Yes	Yes	Yes	NA	Yes	Yes	Yes	Yes	Yes	Yes	NA	NA	NA	NA	67	83	24.9	5.57	184	NA	NA	NA	NA	NA	NA	NA	NA	NA	NA	NA	NA	NA	NA
R056	50151110	R056_11	female	64	Severe	2020-02-01	2020-02-12	2020-01-24	2020-02-03	3	11	NA	NA	NA	NA	NA	NA	NA	NA	NA	NA	NA	NA	NA	NA	NA	NA	NA	NA	NA	NA	NA	NA	NA	NA	NA	NA	NA	NA	NA	NA	NA	NA	NA	NA	NA	NA	NA	NA
R056	50151110	R056_12	female	64	Severe	2020-02-01	2020-02-12	2020-01-24	2020-02-04	4	12	NA	NA	NA	NA	NA	NA	NA	NA	NA	NA	NA	NA	NA	NA	NA	NA	NA	NA	NA	NA	NA	NA	NA	NA	NA	NA	NA	NA	NA	NA	NA	NA	NA	NA	NA	NA	NA	NA
R056	50151110	R056_13	female	64	Severe	2020-02-01	2020-02-12	2020-01-24	2020-02-05	5	13	NA	NA	NA	NA	NA	NA	NA	NA	NA	NA	NA	NA	NA	NA	NA	NA	NA	NA	NA	NA	NA	NA	NA	NA	NA	NA	NA	NA	NA	NA	NA	NA	NA	NA	NA	NA	NA	NA
R056	50151110	R056_14	female	64	Severe	2020-02-01	2020-02-12	2020-01-24	2020-02-06	6	14	NA	NA	NA	NA	NA	NA	NA	NA	NA	NA	NA	NA	NA	NA	NA	NA	NA	NA	negative	NA	NA	NA	NA	NA	NA	NA	NA	NA	NA	NA	NA	NA	NA	NA	NA	NA	NA	NA
R056	50151110	R056_145	female	64	Severe	2020-02-01	2020-02-12	2020-01-24	2020-06-16	137	145	NA	NA	NA	NA	NA	NA	NA	NA	NA	NA	NA	NA	NA	NA	NA	NA	negative	NA	NA	68	82	NA	4.46	283	6.5	1.02	negative	1+	negative	negative	negative	negative	negative	negative	negative	0	1	6
R056	50151110	R056_16	female	64	Severe	2020-02-01	2020-02-12	2020-01-24	2020-02-08	8	16	NA	NA	NA	NA	NA	NA	NA	NA	NA	NA	NA	NA	NA	NA	NA	NA	NA	NA	negative	NA	NA	NA	NA	NA	NA	NA	NA	NA	NA	NA	NA	NA	NA	NA	NA	NA	NA	NA
R056	50151110	R056_17	female	64	Severe	2020-02-01	2020-02-12	2020-01-24	2020-02-09	9	17	NA	NA	NA	NA	NA	NA	NA	NA	NA	NA	NA	NA	NA	NA	NA	NA	NA	positive	NA	NA	NA	NA	NA	NA	NA	NA	NA	NA	NA	NA	NA	NA	NA	NA	NA	NA	NA	NA
R056	50151110	R056_18	female	64	Severe	2020-02-01	2020-02-12	2020-01-24	2020-02-10	10	18	5	Yes	No	Yes	9	NA	NA	NA	NA	NA	NA	NA	NA	NA	NA	NA	NA	NA	NA	67	83	63.8	9.25	220	NA	NA	NA	NA	NA	NA	NA	NA	NA	NA	NA	NA	NA	NA
R056	50151110	R056_19	female	64	Severe	2020-02-01	2020-02-12	2020-01-24	2020-02-11	11	19	NA	NA	NA	NA	NA	NA	Yes	NA	NA	NA	NA	NA	NA	NA	NA	NA	NA	NA	NA	NA	NA	NA	NA	NA	NA	NA	NA	NA	NA	NA	NA	NA	NA	NA	NA	NA	NA	NA
R056	50151110	R056_34	female	64	Severe	2020-02-01	2020-02-12	2020-01-24	2020-02-26	26	34	NA	NA	NA	NA	NA	NA	NA	NA	NA	NA	NA	NA	NA	NA	NA	NA	NA	negative	negative	64	88	46.3	3.33	279	6.5	1.02	negative	+-	negative	negative	negative	negative	negative	negative	negative	NA	0	0
R056	50151110	R056_394	female	64	Severe	2020-02-01	2020-02-12	2020-01-24	2021-02-20	386	394	0	No	No	No	0	NA	Yes	NA	NA	NA	NA	NA	Yes	NA	NA	NA	negative	NA	NA	49	98	61.3	4.58	286	6	1.018	NA	1+	NA	negative	negative	negative	negative	negative	negative	NA	NA	0
R056	50151110	R056_48	female	64	Severe	2020-02-01	2020-02-12	2020-01-24	2020-03-11	40	48	NA	NA	NA	NA	NA	NA	NA	NA	NA	NA	NA	NA	NA	NA	NA	NA	NA	negative	NA	61	92	NA	3.54	285	7	1.02	negative	negative	negative	negative	negative	negative	negative	negative	negative	0	1	3
R056	50151110	R056_749	female	64	Severe	2020-02-01	2020-02-12	2020-01-24	2022-02-10	741	749	NA	NA	NA	NA	NA	NA	NA	NA	NA	NA	NA	NA	NA	NA	NA	NA	NA	NA	NA	58	92	44	4.38	303	7	1.018	negative	1+	negative	negative	negative	negative	negative	negative	negative	0	3	15
R056	50151110	R056_9	female	64	Severe	2020-02-01	2020-02-12	2020-01-24	2020-02-01	1	9	NA	NA	NA	NA	NA	NA	NA	NA	NA	NA	NA	NA	NA	NA	NA	NA	NA	negative	NA	NA	NA	NA	NA	NA	7	1.02	negative	+-	negative	negative	negative	negative	negative	negative	negative	0	4	22
R057	50151112	R057_10	male	39	non-Severe	2020-02-01	2020-02-14	2020-01-23	2020-02-01	1	10	NA	NA	NA	NA	NA	NA	NA	NA	NA	NA	NA	NA	NA	NA	NA	NA	NA	negative	NA	101	80	44.2	4.37	404	5	1.025	negative	negative	negative	negative	negative	negative	negative	negative	negative	0	5	25
R057	50151112	R057_11	male	39	non-Severe	2020-02-01	2020-02-14	2020-01-23	2020/2/2	2	11	NA	NA	NA	NA	NA	NA	NA	Yes	NA	Yes	NA	Yes	Yes	Yes	Yes	NA	NA	NA	NA	NA	NA	NA	NA	NA	NA	NA	NA	NA	NA	NA	NA	NA	NA	NA	NA	NA	NA	NA
R057	50151112	R057_112	male	39	non-Severe	2020-02-01	2020-02-14	2020-01-23	2020-05-13	103	112	NA	NA	NA	NA	NA	NA	NA	NA	NA	NA	NA	NA	NA	NA	NA	NA	NA	NA	NA	86	98	NA	5.83	444	6.5	1.02	negative	negative	negative	negative	negative	negative	negative	negative	negative	0	3	18
R057	50151112	R057_18	male	39	non-Severe	2020-02-01	2020-02-14	2020-01-23	2020-02-09	9	18	NA	NA	NA	NA	NA	NA	NA	NA	NA	NA	NA	NA	NA	NA	NA	NA	NA	NA	negative	NA	NA	NA	NA	NA	NA	NA	NA	NA	NA	NA	NA	NA	NA	NA	NA	NA	NA	NA
R057	50151112	R057_19	male	39	non-Severe	2020-02-01	2020-02-14	2020-01-23	2020-02-10	10	19	2	Yes	No	Yes	6	NA	NA	NA	NA	NA	NA	NA	NA	NA	NA	NA	NA	NA	negative	NA	NA	NA	NA	NA	NA	NA	NA	NA	NA	NA	NA	NA	NA	NA	NA	NA	NA	NA
R057	50151112	R057_20	male	39	non-Severe	2020-02-01	2020-02-14	2020-01-23	2020-02-11	11	20	NA	NA	NA	NA	NA	NA	NA	NA	NA	NA	NA	NA	NA	NA	NA	NA	NA	NA	NA	87	96	23.8	4.17	409	NA	NA	NA	NA	NA	NA	NA	NA	NA	NA	NA	NA	NA	NA
R057	50151112	R057_21	male	39	non-Severe	2020-02-01	2020-02-14	2020-01-23	2020-02-12	12	21	NA	NA	NA	NA	NA	NA	NA	NA	NA	NA	NA	NA	NA	NA	NA	NA	NA	NA	NA	NA	NA	NA	NA	NA	NA	NA	NA	NA	NA	NA	NA	NA	NA	NA	NA	NA	NA	NA
R057	50151112	R057_22	male	39	non-Severe	2020-02-01	2020-02-14	2020-01-23	2020-02-13	13	22	NA	NA	NA	NA	NA	NA	NA	NA	NA	NA	NA	NA	NA	NA	NA	NA	NA	negative	NA	NA	NA	NA	NA	NA	NA	NA	NA	NA	NA	NA	NA	NA	NA	NA	NA	NA	NA	NA
R057	50151112	R057_23	male	39	non-Severe	2020-02-01	2020-02-14	2020-01-23	2020-02-14	14	23	NA	NA	NA	NA	NA	NA	NA	NA	NA	NA	NA	NA	NA	NA	NA	NA	NA	NA	NA	NA	NA	NA	NA	NA	NA	NA	NA	NA	NA	NA	NA	NA	NA	NA	NA	NA	NA	NA
R057	50151112	R057_38	male	39	non-Severe	2020-02-01	2020-02-14	2020-01-23	2020-02-29	29	38	NA	NA	NA	NA	NA	NA	NA	NA	NA	NA	NA	NA	NA	NA	NA	NA	NA	NA	negative	84	100	NA	6.22	500	7	1.02	negative	negative	negative	negative	negative	negative	negative	negative	negative	0	1	6
R057	50151112	R057_384	male	39	non-Severe	2020-02-01	2020-02-14	2020-01-23	2021-02-09	375	384	0	No	No	No	0	NA	NA	NA	NA	NA	NA	NA	Yes	NA	NA	NA	NA	NA	negative	75	109	77.3	7.31	463	6.5	1.022	NA	negative	NA	negative	negative	negative	negative	negative	negative	NA	NA	0
R057	50151112	R057_54	male	39	non-Severe	2020-02-01	2020-02-14	2020-01-23	2020-03-16	45	54	NA	NA	NA	NA	NA	NA	NA	NA	NA	NA	NA	NA	NA	NA	NA	NA	NA	negative	negative	87	96	NA	4.98	545	5.5	1.015	negative	negative	negative	negative	negative	negative	negative	negative	negative	0	1	3
R057	50151112	R057_750	male	39	non-Severe	2020-02-01	2020-02-14	2020-01-23	2022-02-10	741	750	NA	NA	NA	NA	NA	NA	NA	NA	NA	NA	NA	NA	NA	NA	NA	NA	NA	NA	NA	84	98	64.8	7.64	424	6	1.024	negative	negative	negative	negative	negative	negative	negative	negative	negative	0	1	4
R058	50151114	R058_15	male	67	non-Severe	2020-02-01	2020-02-07	2020-01-18	2020-02-01	1	15	NA	NA	NA	NA	NA	NA	NA	NA	NA	NA	NA	NA	NA	NA	NA	NA	NA	positive	NA	NA	NA	NA	NA	NA	6	1.015	negative	negative	negative	negative	negative	negative	negative	negative	negative	0	1	7
R058	50151114	R058_16	male	67	non-Severe	2020-02-01	2020-02-07	2020-01-18	2020-02-02	2	16	NA	NA	NA	NA	NA	NA	NA	NA	NA	Yes	NA	Yes	NA	NA	Yes	NA	NA	NA	negative	96	70	35.1	5.75	471	NA	NA	NA	NA	NA	NA	NA	NA	NA	NA	NA	NA	NA	NA
R058	50151114	R058_17	male	67	non-Severe	2020-02-01	2020-02-07	2020-01-18	2020-02-03	3	17	NA	NA	NA	NA	NA	NA	NA	NA	NA	NA	NA	NA	NA	NA	NA	NA	NA	NA	NA	NA	NA	NA	NA	NA	NA	NA	NA	NA	NA	NA	NA	NA	NA	NA	NA	NA	NA	NA
R058	50151114	R058_19	male	67	non-Severe	2020-02-01	2020-02-07	2020-01-18	2020-02-05	5	19	NA	NA	NA	NA	NA	NA	NA	NA	NA	NA	NA	NA	NA	NA	NA	NA	NA	NA	negative	NA	NA	NA	NA	NA	NA	NA	NA	NA	NA	NA	NA	NA	NA	NA	NA	NA	NA	NA
R058	50151114	R058_20	male	67	non-Severe	2020-02-01	2020-02-07	2020-01-18	2020-02-06	6	20	4	Yes	No	No	5	NA	NA	NA	NA	NA	NA	NA	NA	NA	NA	NA	NA	negative	NA	94	72	36	3.06	473	NA	NA	NA	NA	NA	NA	NA	NA	NA	NA	NA	NA	NA	NA
R058	50151114	R058_39	male	67	non-Severe	2020-02-01	2020-02-07	2020-01-18	2020-02-25	25	39	NA	NA	NA	NA	NA	NA	NA	NA	NA	NA	NA	NA	NA	NA	NA	NA	negative	negative	NA	106	62	45.8	4.72	525	6.5	1.02	negative	1+	1+	negative	negative	negative	negative	negative	negative	NA	2	10
R058	50151114	R058_531	male	67	non-Severe	2020-02-01	2020-02-07	2020-01-18	2021-07-01	517	531	0	No	No	No	0	NA	NA	NA	NA	NA	NA	NA	NA	NA	NA	NA	NA	NA	NA	NA	100	NA	NA	NA	NA	NA	NA	NA	NA	NA	NA	NA	NA	NA	NA	NA	NA	NA
R059	50151115	R059_107	male	39	non-Severe	2020-02-01	2020-02-13	2020-01-28	2020-05-13	103	107	NA	NA	NA	NA	NA	NA	NA	NA	NA	NA	NA	NA	NA	NA	NA	NA	negative	NA	NA	78	107	NA	2.88	412	5	1.02	negative	negative	negative	negative	negative	negative	negative	negative	negative	0	10	54
R059	50151115	R059_13	male	39	non-Severe	2020-02-01	2020-02-13	2020-01-28	2020-02-09	9	13	NA	NA	NA	NA	NA	NA	NA	NA	NA	NA	NA	NA	NA	NA	NA	NA	NA	NA	negative	NA	NA	NA	NA	NA	NA	NA	NA	NA	NA	NA	NA	NA	NA	NA	NA	NA	NA	NA
R059	50151115	R059_14	male	39	non-Severe	2020-02-01	2020-02-13	2020-01-28	2020-02-10	10	14	1	Yes	No	No	2	NA	NA	NA	NA	NA	NA	NA	NA	NA	NA	NA	NA	NA	negative	NA	NA	NA	NA	NA	NA	NA	NA	NA	NA	NA	NA	NA	NA	NA	NA	NA	NA	NA
R059	50151115	R059_15	male	39	non-Severe	2020-02-01	2020-02-13	2020-01-28	2020-02-11	11	15	NA	NA	NA	NA	NA	NA	NA	NA	NA	NA	NA	NA	NA	NA	NA	NA	NA	NA	NA	76	109	36.3	3.27	304	NA	NA	NA	NA	NA	NA	NA	NA	NA	NA	NA	NA	NA	NA
R059	50151115	R059_17	male	39	non-Severe	2020-02-01	2020-02-13	2020-01-28	2020-02-13	13	17	NA	NA	NA	NA	NA	NA	Yes	NA	NA	NA	NA	NA	NA	NA	NA	NA	NA	NA	NA	NA	NA	NA	NA	NA	NA	NA	NA	NA	NA	NA	NA	NA	NA	NA	NA	NA	NA	NA
R059	50151115	R059_33	male	39	non-Severe	2020-02-01	2020-02-13	2020-01-28	2020-02-29	29	33	NA	NA	NA	NA	NA	NA	NA	NA	NA	NA	NA	NA	NA	NA	NA	NA	negative	negative	NA	73	111	NA	4.48	372	6	1.02	negative	negative	negative	negative	negative	negative	negative	negative	negative	0	0	2
R059	50151115	R059_379	male	39	non-Severe	2020-02-01	2020-02-13	2020-01-28	2021-02-09	375	379	0	No	No	No	0	NA	Yes	NA	NA	NA	NA	NA	Yes	NA	NA	NA	negative	NA	negative	66	115	44.1	4.07	356	5.5	1.02	NA	negative	NA	negative	negative	negative	negative	negative	negative	NA	NA	0
R059	50151115	R059_49	male	39	non-Severe	2020-02-01	2020-02-13	2020-01-28	2020-03-16	45	49	NA	NA	NA	NA	NA	NA	NA	NA	NA	NA	NA	NA	NA	NA	NA	NA	negative	negative	NA	81	105	NA	4.83	396	5	1.02	negative	negative	negative	negative	negative	negative	negative	negative	negative	0	0	2
R059	50151115	R059_5	male	39	non-Severe	2020-02-01	2020-02-13	2020-01-28	2020-02-01	1	5	NA	NA	NA	NA	NA	NA	NA	NA	NA	NA	NA	NA	NA	NA	NA	NA	NA	negative	NA	84	100	27.5	4.37	370	5	1.02	negative	negative	negative	negative	negative	negative	negative	negative	negative	1	3	18
R059	50151115	R059_6	male	39	non-Severe	2020-02-01	2020-02-13	2020-01-28	2020-02-02	2	6	NA	NA	NA	NA	NA	Yes	Yes	Yes	NA	Yes	Yes	NA	NA	NA	NA	NA	NA	NA	NA	NA	NA	NA	NA	NA	NA	NA	NA	NA	NA	NA	NA	NA	NA	NA	NA	NA	NA	NA
R059	50151115	R059_7	male	39	non-Severe	2020-02-01	2020-02-13	2020-01-28	2020-02-03	3	7	NA	NA	NA	NA	NA	NA	NA	NA	NA	NA	NA	NA	NA	NA	NA	NA	NA	NA	NA	NA	NA	NA	NA	NA	NA	NA	NA	NA	NA	NA	NA	NA	NA	NA	NA	NA	NA	NA
R059	50151115	R059_745	male	39	non-Severe	2020-02-01	2020-02-13	2020-01-28	2022-02-10	741	745	NA	NA	NA	NA	NA	NA	NA	NA	NA	NA	NA	NA	NA	NA	NA	NA	NA	NA	NA	84	99	40.6	4.76	401	6.5	1.015	negative	negative	negative	negative	negative	negative	negative	negative	negative	0	0	0
R059	50151115	R059_8	male	39	non-Severe	2020-02-01	2020-02-13	2020-01-28	2020/2/4	4	8	NA	NA	NA	NA	NA	NA	NA	NA	NA	NA	NA	Yes	Yes	Yes	Yes	NA	NA	NA	NA	NA	NA	NA	NA	NA	NA	NA	NA	NA	NA	NA	NA	NA	NA	NA	NA	NA	NA	NA
R060	50151116	R060_10	male	55	Severe	2020-02-01	2020-02-27	2020-01-24	2020/2/2	2	10	NA	NA	NA	NA	NA	Yes	NA	Yes	NA	NA	Yes	NA	NA	NA	NA	NA	NA	NA	NA	NA	NA	NA	NA	NA	NA	NA	NA	NA	NA	NA	NA	NA	NA	NA	NA	NA	NA	NA
R060	50151116	R060_12	male	55	Severe	2020-02-01	2020-02-27	2020-01-24	2020-02-04	4	12	4	Yes	Yes	Yes	10	NA	NA	Yes	Yes	NA	NA	NA	NA	NA	NA	NA	NA	NA	NA	NA	NA	NA	NA	NA	NA	NA	NA	NA	NA	NA	NA	NA	NA	NA	NA	NA	NA	NA
R060	50151116	R060_13	male	55	Severe	2020-02-01	2020-02-27	2020-01-24	2020-02-05	5	13	NA	NA	NA	NA	NA	NA	NA	NA	NA	NA	NA	NA	NA	NA	NA	NA	NA	NA	NA	NA	NA	NA	NA	NA	NA	NA	NA	NA	NA	NA	NA	NA	NA	NA	NA	NA	NA	NA
R060	50151116	R060_14	male	55	Severe	2020-02-01	2020-02-27	2020-01-24	2020-02-06	6	14	NA	NA	NA	NA	NA	NA	NA	NA	NA	NA	NA	NA	NA	NA	NA	NA	NA	NA	NA	111	64	NA	8.61	246	NA	NA	NA	NA	NA	NA	NA	NA	NA	NA	NA	NA	NA	NA
R060	50151116	R060_15	male	55	Severe	2020-02-01	2020-02-27	2020-01-24	2020-02-07	7	15	NA	NA	NA	NA	NA	NA	NA	NA	NA	NA	NA	NA	NA	NA	NA	NA	NA	NA	NA	NA	NA	NA	NA	NA	NA	NA	NA	NA	NA	NA	NA	NA	NA	NA	NA	NA	NA	NA
R060	50151116	R060_16	male	55	Severe	2020-02-01	2020-02-27	2020-01-24	2020-02-08	8	16	NA	NA	NA	NA	NA	NA	NA	NA	NA	NA	NA	NA	NA	NA	NA	NA	NA	NA	NA	NA	NA	NA	NA	NA	NA	NA	NA	NA	NA	NA	NA	NA	NA	NA	NA	NA	NA	NA
R060	50151116	R060_18	male	55	Severe	2020-02-01	2020-02-27	2020-01-24	2020-02-10	10	18	5	Yes	Yes	Yes	11	NA	NA	Yes	Yes	NA	NA	NA	NA	NA	NA	NA	NA	NA	NA	112	63	38.1	8.64	255	NA	NA	NA	NA	NA	NA	NA	NA	NA	NA	NA	NA	NA	NA
R060	50151116	R060_19	male	55	Severe	2020-02-01	2020-02-27	2020-01-24	2020-02-11	11	19	NA	NA	NA	NA	NA	NA	NA	NA	NA	NA	NA	NA	NA	NA	NA	NA	NA	NA	NA	NA	NA	NA	NA	NA	NA	NA	NA	NA	NA	NA	NA	NA	NA	NA	NA	NA	NA	NA
R060	50151116	R060_20	male	55	Severe	2020-02-01	2020-02-27	2020-01-24	2020-02-12	12	20	NA	NA	NA	NA	NA	NA	NA	NA	NA	NA	NA	NA	NA	NA	NA	NA	NA	NA	NA	NA	NA	NA	NA	NA	NA	NA	NA	NA	NA	NA	NA	NA	NA	NA	NA	NA	NA	NA
R060	50151116	R060_21	male	55	Severe	2020-02-01	2020-02-27	2020-01-24	2020-02-13	13	21	NA	NA	NA	NA	NA	NA	NA	NA	NA	NA	NA	NA	NA	NA	NA	NA	NA	NA	NA	NA	NA	NA	NA	NA	NA	NA	NA	NA	NA	NA	NA	NA	NA	NA	NA	NA	NA	NA
R060	50151116	R060_22	male	55	Severe	2020-02-01	2020-02-27	2020-01-24	2020-02-14	14	22	NA	NA	NA	NA	NA	NA	NA	NA	NA	NA	NA	NA	NA	NA	NA	NA	NA	NA	NA	NA	NA	NA	NA	NA	NA	NA	NA	NA	NA	NA	NA	NA	NA	NA	NA	NA	NA	NA
R060	50151116	R060_24	male	55	Severe	2020-02-01	2020-02-27	2020-01-24	2020-02-16	16	24	NA	NA	NA	NA	NA	NA	NA	Yes	Yes	NA	NA	NA	NA	NA	NA	NA	NA	NA	NA	131	52	45.7	5.35	342	NA	NA	NA	NA	NA	NA	NA	NA	NA	NA	NA	NA	NA	NA
R060	50151116	R060_25	male	55	Severe	2020-02-01	2020-02-27	2020-01-24	2020-02-17	17	25	NA	NA	NA	NA	NA	NA	NA	NA	NA	NA	NA	NA	NA	NA	NA	NA	NA	NA	NA	NA	NA	NA	NA	NA	NA	NA	NA	NA	NA	NA	NA	NA	NA	NA	NA	NA	NA	NA
R060	50151116	R060_26	male	55	Severe	2020-02-01	2020-02-27	2020-01-24	2020-02-18	18	26	NA	NA	NA	NA	NA	NA	NA	NA	NA	NA	NA	NA	NA	NA	NA	NA	NA	NA	NA	NA	NA	NA	NA	NA	NA	NA	NA	NA	NA	NA	NA	NA	NA	NA	NA	NA	NA	NA
R060	50151116	R060_27	male	55	Severe	2020-02-01	2020-02-27	2020-01-24	2020-02-19	19	27	NA	NA	NA	NA	NA	NA	NA	NA	NA	NA	NA	NA	NA	NA	NA	NA	NA	NA	negative	NA	NA	NA	NA	NA	NA	NA	NA	NA	NA	NA	NA	NA	NA	NA	NA	NA	NA	NA
R060	50151116	R060_28	male	55	Severe	2020-02-01	2020-02-27	2020-01-24	2020-02-20	20	28	NA	NA	NA	NA	NA	NA	NA	Yes	Yes	NA	NA	NA	NA	NA	NA	NA	NA	negative	negative	118	59	NA	5.13	312	NA	NA	NA	NA	NA	NA	NA	NA	NA	NA	NA	NA	NA	NA
R060	50151116	R060_31	male	55	Severe	2020-02-01	2020-02-27	2020-01-24	2020-02-23	23	31	NA	NA	NA	NA	NA	NA	NA	NA	NA	NA	NA	NA	NA	NA	NA	NA	negative	NA	NA	NA	NA	NA	NA	NA	NA	NA	NA	NA	NA	NA	NA	NA	NA	NA	NA	NA	NA	NA
R060	50151116	R060_32	male	55	Severe	2020-02-01	2020-02-27	2020-01-24	2020-02-24	24	32	4	Yes	No	Yes	8	NA	NA	NA	NA	NA	NA	NA	NA	NA	NA	NA	negative	negative	NA	NA	NA	NA	NA	NA	NA	NA	NA	NA	NA	NA	NA	NA	NA	NA	NA	NA	NA	NA
R060	50151116	R060_33	male	55	Severe	2020-02-01	2020-02-27	2020-01-24	2020-02-25	25	33	NA	NA	NA	NA	NA	NA	NA	NA	NA	NA	NA	NA	NA	NA	NA	NA	negative	NA	NA	NA	NA	NA	NA	NA	NA	NA	NA	NA	NA	NA	NA	NA	NA	NA	NA	NA	NA	NA
R060	50151116	R060_34	male	55	Severe	2020-02-01	2020-02-27	2020-01-24	2020-02-26	26	34	NA	NA	NA	NA	NA	NA	NA	NA	NA	NA	NA	NA	NA	NA	NA	NA	NA	NA	NA	NA	NA	NA	NA	NA	NA	NA	NA	NA	NA	NA	NA	NA	NA	NA	NA	NA	NA	NA
R060	50151116	R060_35	male	55	Severe	2020-02-01	2020-02-27	2020-01-24	2020-02-27	27	35	NA	NA	NA	NA	NA	NA	NA	NA	NA	NA	NA	NA	NA	NA	Yes	NA	NA	NA	NA	NA	NA	NA	NA	NA	NA	NA	NA	NA	NA	NA	NA	NA	NA	NA	NA	NA	NA	NA
R060	50151116	R060_42	male	55	Severe	2020-02-01	2020-02-27	2020-01-24	2020-03-05	34	42	NA	NA	NA	NA	NA	NA	NA	NA	NA	NA	NA	NA	NA	NA	NA	NA	negative	negative	NA	NA	NA	NA	NA	NA	NA	NA	NA	NA	NA	NA	NA	NA	NA	NA	NA	NA	NA	NA
R060	50151116	R060_49	male	55	Severe	2020-02-01	2020-02-27	2020-01-24	2020-03-12	41	49	NA	NA	NA	NA	NA	NA	NA	NA	NA	NA	NA	NA	NA	NA	NA	NA	negative	negative	NA	104	69	NA	3.53	387	6	1.015	negative	negative	negative	negative	negative	negative	negative	negative	negative	0	1	5
R060	50151116	R060_68	male	55	Severe	2020-02-01	2020-02-27	2020-01-24	2020-03-31	60	68	NA	NA	NA	NA	NA	NA	NA	NA	NA	NA	NA	NA	NA	NA	NA	NA	negative	negative	NA	NA	NA	NA	NA	NA	5	1.02	negative	negative	negative	+-	negative	negative	negative	negative	negative	0	1	3
R060	50151116	R060_69	male	55	Severe	2020-02-01	2020-02-27	2020-01-24	2020-04-01	61	69	NA	NA	NA	NA	NA	NA	NA	NA	NA	NA	NA	NA	NA	NA	NA	NA	NA	negative	NA	NA	NA	NA	NA	NA	NA	NA	NA	NA	NA	NA	NA	NA	NA	NA	NA	NA	NA	NA
R060	50151116	R060_8	male	55	Severe	2020-02-01	2020-02-27	2020-01-24	2020-01-31	0	8	NA	NA	NA	NA	NA	NA	NA	NA	NA	NA	NA	NA	NA	NA	NA	NA	positive	NA	positive	NA	NA	NA	NA	NA	NA	NA	NA	NA	NA	NA	NA	NA	NA	NA	NA	NA	NA	NA
R060	50151116	R060_9	male	55	Severe	2020-02-01	2020-02-27	2020-01-24	2020-02-01	1	9	NA	NA	NA	NA	NA	NA	NA	Yes	Yes	NA	NA	NA	NA	NA	NA	NA	NA	NA	NA	142	48	22.2	8.2	358	NA	NA	NA	NA	NA	NA	NA	NA	NA	NA	NA	NA	NA	NA
R061	50151117	R061_10	female	52	Severe	2020-02-01	2020-03-03	2020-01-27	2020-02-05	5	10	NA	NA	NA	NA	NA	NA	NA	NA	NA	NA	NA	NA	NA	NA	NA	NA	NA	negative	NA	NA	NA	NA	NA	NA	NA	NA	NA	NA	NA	NA	NA	NA	NA	NA	NA	NA	NA	NA
R061	50151117	R061_11	female	52	Severe	2020-02-01	2020-03-03	2020-01-27	2020-02-06	6	11	NA	NA	NA	NA	NA	NA	NA	NA	NA	NA	NA	NA	NA	NA	NA	NA	NA	NA	NA	NA	NA	NA	NA	NA	NA	NA	NA	NA	NA	NA	NA	NA	NA	NA	NA	NA	NA	NA
R061	50151117	R061_13	female	52	Severe	2020-02-01	2020-03-03	2020-01-27	2020-02-08	8	13	NA	NA	NA	NA	NA	NA	NA	NA	NA	NA	NA	NA	NA	NA	NA	NA	NA	NA	NA	NA	NA	NA	NA	NA	NA	NA	NA	NA	NA	NA	NA	NA	NA	NA	NA	NA	NA	NA
R061	50151117	R061_15	female	52	Severe	2020-02-01	2020-03-03	2020-01-27	2020-02-10	10	15	5	Yes	Yes	Yes	11	NA	NA	NA	NA	NA	NA	NA	NA	NA	NA	NA	NA	NA	NA	67	91	17.2	5.6	172	NA	NA	NA	NA	NA	NA	NA	NA	NA	NA	NA	NA	NA	NA
R061	50151117	R061_16	female	52	Severe	2020-02-01	2020-03-03	2020-01-27	2020-02-11	11	16	NA	NA	NA	NA	NA	NA	NA	NA	NA	NA	NA	NA	NA	NA	NA	NA	NA	NA	NA	NA	NA	NA	NA	NA	NA	NA	NA	NA	NA	NA	NA	NA	NA	NA	NA	NA	NA	NA
R061	50151117	R061_18	female	52	Severe	2020-02-01	2020-03-03	2020-01-27	2020-02-13	13	18	NA	NA	NA	NA	NA	NA	NA	NA	NA	NA	NA	NA	NA	NA	NA	NA	NA	NA	NA	NA	NA	NA	NA	NA	NA	NA	NA	NA	NA	NA	NA	NA	NA	NA	NA	NA	NA	NA
R061	50151117	R061_21	female	52	Severe	2020-02-01	2020-03-03	2020-01-27	2020-02-16	16	21	NA	NA	NA	NA	NA	NA	NA	NA	NA	NA	NA	NA	NA	NA	NA	NA	NA	NA	NA	60	101	18.9	3.3	202	NA	NA	NA	NA	NA	NA	NA	NA	NA	NA	NA	NA	NA	NA
R061	50151117	R061_24	female	52	Severe	2020-02-01	2020-03-03	2020-01-27	2020-02-19	19	24	NA	NA	NA	NA	NA	NA	NA	NA	NA	NA	NA	NA	NA	NA	NA	NA	NA	NA	negative	NA	NA	NA	NA	NA	NA	NA	NA	NA	NA	NA	NA	NA	NA	NA	NA	NA	NA	NA
R061	50151117	R061_25	female	52	Severe	2020-02-01	2020-03-03	2020-01-27	2020-02-20	20	25	NA	NA	NA	NA	NA	NA	NA	NA	NA	NA	NA	NA	NA	NA	NA	NA	NA	negative	negative	53	105	NA	3.3	262	NA	NA	NA	NA	NA	NA	NA	NA	NA	NA	NA	NA	NA	NA
R061	50151117	R061_28	female	52	Severe	2020-02-01	2020-03-03	2020-01-27	2020-02-23	23	28	NA	NA	NA	NA	NA	NA	NA	NA	NA	NA	NA	NA	NA	NA	NA	NA	negative	NA	NA	NA	NA	NA	NA	NA	NA	NA	NA	NA	NA	NA	NA	NA	NA	NA	NA	NA	NA	NA
R061	50151117	R061_29	female	52	Severe	2020-02-01	2020-03-03	2020-01-27	2020-02-24	24	29	NA	NA	NA	NA	NA	NA	NA	NA	NA	NA	NA	NA	NA	NA	NA	NA	negative	positive	NA	NA	NA	NA	NA	NA	NA	NA	NA	NA	NA	NA	NA	NA	NA	NA	NA	NA	NA	NA
R061	50151117	R061_30	female	52	Severe	2020-02-01	2020-03-03	2020-01-27	2020-02-25	25	30	NA	NA	NA	NA	NA	NA	NA	NA	NA	NA	NA	NA	NA	NA	NA	NA	negative	NA	NA	NA	NA	NA	NA	NA	NA	NA	NA	NA	NA	NA	NA	NA	NA	NA	NA	NA	NA	NA
R061	50151117	R061_31	female	52	Severe	2020-02-01	2020-03-03	2020-01-27	2020-02-26	26	31	NA	NA	NA	NA	NA	NA	NA	NA	NA	NA	NA	NA	NA	NA	NA	NA	NA	positive	NA	NA	NA	NA	NA	NA	NA	NA	NA	NA	NA	NA	NA	NA	NA	NA	NA	NA	NA	NA
R061	50151117	R061_32	female	52	Severe	2020-02-01	2020-03-03	2020-01-27	2020-02-27	27	32	NA	NA	NA	NA	NA	NA	NA	NA	NA	NA	NA	NA	NA	NA	NA	NA	NA	NA	NA	55	104	NA	3.45	237	NA	NA	NA	NA	NA	NA	NA	NA	NA	NA	NA	NA	NA	NA
R061	50151117	R061_34	female	52	Severe	2020-02-01	2020-03-03	2020-01-27	2020-02-29	29	34	NA	NA	NA	NA	NA	NA	NA	NA	NA	NA	NA	NA	NA	NA	NA	NA	NA	positive	NA	NA	NA	NA	NA	NA	NA	NA	NA	NA	NA	NA	NA	NA	NA	NA	NA	NA	NA	NA
R061	50151117	R061_36	female	52	Severe	2020-02-01	2020-03-03	2020-01-27	2020/3/2	31	36	4	Yes	No	No	5	NA	NA	NA	NA	NA	NA	NA	NA	NA	NA	NA	negative	negative	NA	NA	NA	NA	NA	NA	NA	NA	NA	NA	NA	NA	NA	NA	NA	NA	NA	NA	NA	NA
R061	50151117	R061_45	female	52	Severe	2020-02-01	2020-03-03	2020-01-27	2020-03-11	40	45	NA	NA	NA	NA	NA	NA	NA	NA	NA	NA	NA	NA	NA	NA	NA	NA	negative	negative	NA	NA	NA	NA	NA	NA	NA	NA	NA	NA	NA	NA	NA	NA	NA	NA	NA	NA	NA	NA
R061	50151117	R061_5	female	52	Severe	2020-02-01	2020-03-03	2020-01-27	2020-01-31	0	5	NA	NA	NA	NA	NA	NA	NA	NA	NA	NA	NA	NA	NA	NA	NA	NA	positive	NA	positive	NA	NA	NA	NA	NA	NA	NA	NA	NA	NA	NA	NA	NA	NA	NA	NA	NA	NA	NA
R061	50151117	R061_51	female	52	Severe	2020-02-01	2020-03-03	2020-01-27	2020-03-17	46	51	NA	NA	NA	NA	NA	NA	NA	NA	NA	NA	NA	NA	NA	NA	NA	NA	negative	negative	NA	57	103	NA	4.27	279	5	1.03	negative	+-	negative	negative	negative	negative	negative	negative	negative	0	1	6
R061	50151117	R061_6	female	52	Severe	2020-02-01	2020-03-03	2020-01-27	2020-02-01	1	6	NA	NA	NA	NA	NA	NA	NA	NA	NA	NA	NA	NA	NA	NA	NA	NA	NA	NA	NA	63	98	19.6	3.08	269	6.5	1.015	negative	3+	negative	negative	negative	negative	1+	negative	negative	0	11	63
R061	50151117	R061_65	female	52	Severe	2020-02-01	2020-03-03	2020-01-27	2020-03-31	60	65	NA	NA	NA	NA	NA	NA	NA	NA	NA	NA	NA	NA	NA	NA	NA	NA	negative	negative	NA	NA	NA	NA	NA	NA	NA	NA	NA	NA	NA	NA	NA	NA	NA	NA	NA	NA	NA	NA
R061	50151117	R061_7	female	52	Severe	2020-02-01	2020-03-03	2020-01-27	2020/2/2	2	7	NA	NA	NA	NA	NA	Yes	NA	Yes	NA	NA	Yes	NA	NA	NA	NA	NA	NA	NA	NA	NA	NA	NA	NA	NA	NA	NA	NA	NA	NA	NA	NA	NA	NA	NA	NA	NA	NA	NA
R061	50151117	R061_8	female	52	Severe	2020-02-01	2020-03-03	2020-01-27	2020-02-03	3	8	NA	NA	NA	NA	NA	NA	NA	NA	NA	NA	NA	NA	NA	NA	NA	NA	NA	NA	NA	NA	NA	NA	NA	NA	NA	NA	NA	NA	NA	NA	NA	NA	NA	NA	NA	NA	NA	NA
R061	50151117	R061_9	female	52	Severe	2020-02-01	2020-03-03	2020-01-27	2020-02-04	4	9	5	Yes	Yes	No	8	NA	NA	NA	NA	NA	NA	NA	NA	NA	NA	NA	NA	NA	NA	62	100	18	3.2	225	NA	NA	NA	NA	NA	NA	NA	NA	NA	NA	NA	NA	NA	NA
R062	50151118	R062_10	female	65	Severe	2020-02-01	2020-03-07	2020-01-24	2020/2/2	2	10	NA	NA	NA	NA	NA	Yes	NA	Yes	NA	NA	Yes	Yes	NA	Yes	Yes	NA	NA	NA	NA	NA	NA	NA	NA	NA	NA	NA	NA	NA	NA	NA	NA	NA	NA	NA	NA	NA	NA	NA
R062	50151118	R062_11	female	65	Severe	2020-02-01	2020-03-07	2020-01-24	2020-02-03	3	11	NA	NA	NA	NA	NA	NA	NA	NA	NA	NA	NA	NA	NA	NA	NA	NA	NA	NA	NA	NA	NA	NA	NA	NA	NA	NA	NA	NA	NA	NA	NA	NA	NA	NA	NA	NA	NA	NA
R062	50151118	R062_12	female	65	Severe	2020-02-01	2020-03-07	2020-01-24	2020-02-04	4	12	4	Yes	Yes	Yes	10	NA	NA	Yes	Yes	NA	NA	NA	NA	NA	NA	NA	NA	NA	NA	169	27	20.9	10.2	512	NA	NA	NA	NA	NA	NA	NA	NA	NA	NA	NA	NA	NA	NA
R062	50151118	R062_13	female	65	Severe	2020-02-01	2020-03-07	2020-01-24	2020-02-05	5	13	NA	NA	NA	NA	NA	NA	NA	NA	NA	NA	NA	NA	NA	NA	NA	NA	NA	positive	NA	NA	NA	NA	NA	NA	NA	NA	NA	NA	NA	NA	NA	NA	NA	NA	NA	NA	NA	NA
R062	50151118	R062_14	female	65	Severe	2020-02-01	2020-03-07	2020-01-24	2020-02-06	6	14	NA	NA	NA	NA	NA	NA	NA	Yes	Yes	Yes	NA	NA	NA	NA	NA	NA	NA	NA	NA	137	35	29.5	8.94	449	NA	NA	NA	NA	NA	NA	NA	NA	NA	NA	NA	NA	NA	NA
R062	50151118	R062_15	female	65	Severe	2020-02-01	2020-03-07	2020-01-24	2020-02-07	7	15	NA	NA	NA	NA	NA	NA	NA	NA	NA	NA	NA	NA	NA	NA	NA	NA	NA	NA	NA	NA	NA	NA	NA	NA	NA	NA	NA	NA	NA	NA	NA	NA	NA	NA	NA	NA	NA	NA
R062	50151118	R062_16	female	65	Severe	2020-02-01	2020-03-07	2020-01-24	2020-02-08	8	16	NA	NA	NA	NA	NA	NA	NA	NA	Yes	NA	NA	NA	NA	NA	NA	NA	NA	NA	NA	NA	NA	NA	NA	NA	NA	NA	NA	NA	NA	NA	NA	NA	NA	NA	NA	NA	NA	NA
R062	50151118	R062_17	female	65	Severe	2020-02-01	2020-03-07	2020-01-24	2020-02-09	9	17	NA	NA	NA	NA	NA	NA	NA	NA	NA	NA	NA	NA	NA	NA	NA	NA	NA	NA	NA	NA	NA	NA	NA	NA	NA	NA	NA	NA	NA	NA	NA	NA	NA	NA	NA	NA	NA	NA
R062	50151118	R062_18	female	65	Severe	2020-02-01	2020-03-07	2020-01-24	2020-02-10	10	18	NA	NA	NA	NA	NA	NA	NA	Yes	NA	NA	NA	NA	NA	NA	NA	NA	NA	NA	NA	NA	NA	NA	NA	NA	NA	NA	NA	NA	NA	NA	NA	NA	NA	NA	NA	NA	NA	NA
R062	50151118	R062_19	female	65	Severe	2020-02-01	2020-03-07	2020-01-24	2020-02-11	11	19	NA	NA	NA	NA	NA	NA	NA	Yes	Yes	NA	NA	NA	NA	NA	NA	NA	NA	NA	NA	104	49	46.9	8.19	196	NA	NA	NA	NA	NA	NA	NA	NA	NA	NA	NA	NA	NA	NA
R062	50151118	R062_20	female	65	Severe	2020-02-01	2020-03-07	2020-01-24	2020-02-12	12	20	NA	NA	NA	NA	NA	NA	NA	Yes	Yes	NA	NA	NA	NA	NA	NA	NA	NA	NA	NA	107	47	NA	9.33	213	NA	NA	NA	NA	NA	NA	NA	NA	NA	NA	NA	NA	NA	NA
R062	50151118	R062_21	female	65	Severe	2020-02-01	2020-03-07	2020-01-24	2020-02-13	13	21	NA	NA	NA	NA	NA	NA	NA	Yes	Yes	NA	NA	NA	NA	NA	NA	NA	positive	NA	positive	NA	NA	NA	NA	NA	NA	NA	NA	NA	NA	NA	NA	NA	NA	NA	NA	NA	NA	NA
R062	50151118	R062_24	female	65	Severe	2020-02-01	2020-03-07	2020-01-24	2020-02-16	16	24	NA	NA	NA	NA	NA	NA	NA	Yes	Yes	NA	NA	NA	NA	NA	NA	NA	NA	NA	NA	97	53	52.6	5.89	255	NA	NA	NA	NA	NA	NA	NA	NA	NA	NA	NA	NA	NA	NA
R062	50151118	R062_27	female	65	Severe	2020-02-01	2020-03-07	2020-01-24	2020-02-19	19	27	NA	NA	NA	NA	NA	NA	NA	NA	NA	NA	NA	NA	NA	NA	NA	NA	positive	NA	NA	NA	NA	NA	NA	NA	NA	NA	NA	NA	NA	NA	NA	NA	NA	NA	NA	NA	NA	NA
R062	50151118	R062_28	female	65	Severe	2020-02-01	2020-03-07	2020-01-24	2020-02-20	20	28	NA	NA	NA	NA	NA	NA	NA	NA	NA	NA	NA	NA	NA	NA	NA	positive	NA	NA	NA	NA	NA	NA	NA	NA	NA	NA	NA	NA	NA	NA	NA	NA	NA	NA	NA	NA	NA	NA
R062	50151118	R062_29	female	65	Severe	2020-02-01	2020-03-07	2020-01-24	2020-02-21	21	29	NA	NA	NA	NA	NA	NA	NA	Yes	Yes	NA	NA	NA	NA	NA	NA	NA	NA	NA	NA	98	52	64.3	7.66	285	NA	NA	NA	NA	NA	NA	NA	NA	NA	NA	NA	NA	NA	NA
R062	50151118	R062_30	female	65	Severe	2020-02-01	2020-03-07	2020-01-24	2020-02-22	22	30	5	Yes	Yes	Yes	11	NA	NA	NA	NA	NA	NA	NA	NA	NA	NA	NA	positive	NA	positive	NA	NA	NA	NA	NA	NA	NA	NA	NA	NA	NA	NA	NA	NA	NA	NA	NA	NA	NA
R062	50151118	R062_32	female	65	Severe	2020-02-01	2020-03-07	2020-01-24	2020-02-24	24	32	NA	NA	NA	NA	NA	NA	NA	NA	NA	NA	NA	NA	NA	NA	NA	NA	positive	NA	NA	NA	NA	NA	NA	NA	NA	NA	NA	NA	NA	NA	NA	NA	NA	NA	NA	NA	NA	NA
R062	50151118	R062_33	female	65	Severe	2020-02-01	2020-03-07	2020-01-24	2020-02-25	25	33	NA	NA	NA	NA	NA	NA	NA	Yes	Yes	NA	NA	NA	NA	NA	NA	NA	NA	NA	NA	107	47	73.7	5.67	281	NA	NA	NA	NA	NA	NA	NA	NA	NA	NA	NA	NA	NA	NA
R062	50151118	R062_34	female	65	Severe	2020-02-01	2020-03-07	2020-01-24	2020-02-26	26	34	NA	NA	NA	NA	NA	NA	NA	Yes	Yes	NA	NA	NA	NA	NA	NA	NA	positive	negative	NA	NA	NA	NA	NA	NA	NA	NA	NA	NA	NA	NA	NA	NA	NA	NA	NA	NA	NA	NA
R062	50151118	R062_36	female	65	Severe	2020-02-01	2020-03-07	2020-01-24	2020-02-28	28	36	NA	NA	NA	NA	NA	NA	NA	Yes	Yes	NA	NA	NA	NA	NA	NA	NA	NA	NA	NA	111	45	33.6	4.97	315	NA	NA	NA	NA	NA	NA	NA	NA	NA	NA	NA	NA	NA	NA
R062	50151118	R062_37	female	65	Severe	2020-02-01	2020-03-07	2020-01-24	2020-02-29	29	37	NA	NA	NA	NA	NA	NA	NA	NA	NA	NA	NA	NA	NA	NA	NA	NA	positive	negative	NA	NA	NA	NA	NA	NA	NA	NA	NA	NA	NA	NA	NA	NA	NA	NA	NA	NA	NA	NA
R062	50151118	R062_40	female	65	Severe	2020-02-01	2020-03-07	2020-01-24	2020-03-03	32	40	NA	NA	NA	NA	NA	NA	NA	NA	NA	NA	NA	NA	NA	NA	NA	NA	negative	negative	NA	NA	NA	NA	NA	NA	NA	NA	NA	NA	NA	NA	NA	NA	NA	NA	NA	NA	NA	NA
R062	50151118	R062_41	female	65	Severe	2020-02-01	2020-03-07	2020-01-24	2020-03-04	33	41	4	Yes	No	Yes	8	NA	NA	Yes	Yes	NA	NA	NA	NA	NA	NA	NA	NA	NA	NA	111	45	NA	4.42	365	NA	NA	NA	NA	NA	NA	NA	NA	NA	NA	NA	NA	NA	NA
R062	50151118	R062_42	female	65	Severe	2020-02-01	2020-03-07	2020-01-24	2020-03-05	34	42	NA	NA	NA	NA	NA	NA	NA	NA	NA	NA	NA	NA	NA	NA	NA	NA	negative	NA	NA	NA	NA	NA	NA	NA	NA	NA	NA	NA	NA	NA	NA	NA	NA	NA	NA	NA	NA	NA
R062	50151118	R062_43	female	65	Severe	2020-02-01	2020-03-07	2020-01-24	2020-03-06	35	43	NA	NA	NA	NA	NA	NA	NA	Yes	Yes	NA	NA	NA	NA	NA	NA	NA	positive	NA	NA	NA	NA	NA	NA	NA	NA	NA	NA	NA	NA	NA	NA	NA	NA	NA	NA	NA	NA	NA
R062	50151118	R062_50	female	65	Severe	2020-02-01	2020-03-07	2020-01-24	2020-03-13	42	50	NA	NA	NA	NA	NA	NA	NA	NA	NA	NA	NA	NA	NA	NA	NA	NA	positive	negative	NA	NA	NA	NA	NA	NA	NA	NA	NA	NA	NA	NA	NA	NA	NA	NA	NA	NA	NA	NA
R062	50151118	R062_58	female	65	Severe	2020-02-01	2020-03-07	2020-01-24	2020-03-21	50	58	NA	NA	NA	NA	NA	NA	NA	Yes	NA	NA	NA	NA	NA	NA	NA	NA	positive	negative	NA	107	47	NA	4.21	420	5	1.02	negative	negative	negative	negative	negative	negative	negative	negative	negative	0	2	11
R062	50151118	R062_8	female	65	Severe	2020-02-01	2020-03-07	2020-01-24	2020-01-31	0	8	NA	NA	NA	NA	NA	NA	NA	NA	NA	NA	NA	NA	NA	NA	NA	NA	NA	NA	positive	NA	NA	NA	NA	NA	NA	NA	NA	NA	NA	NA	NA	NA	NA	NA	NA	NA	NA	NA
R062	50151118	R062_9	female	65	Severe	2020-02-01	2020-03-07	2020-01-24	2020-02-01	1	9	NA	NA	NA	NA	NA	NA	NA	Yes	Yes	NA	NA	NA	NA	NA	NA	NA	NA	NA	NA	NA	NA	NA	NA	NA	NA	NA	NA	NA	NA	NA	NA	NA	NA	NA	NA	NA	NA	NA
R063	50151128	R063_10	female	36	non-Severe	2020-02-01	2020-02-08	2020-01-28	2020-02-06	6	10	1	Yes	No	No	2	NA	NA	NA	NA	NA	NA	NA	NA	NA	NA	NA	NA	NA	negative	84	77	NA	3.44	303	NA	NA	NA	NA	NA	NA	NA	NA	NA	NA	NA	NA	NA	NA
R063	50151128	R063_102	female	36	non-Severe	2020-02-01	2020-02-08	2020-01-28	2020-05-08	98	102	NA	NA	NA	NA	NA	NA	NA	NA	NA	NA	NA	NA	NA	NA	NA	NA	negative	NA	NA	NA	NA	NA	NA	NA	NA	NA	NA	NA	NA	NA	NA	NA	NA	NA	NA	NA	NA	NA
R063	50151128	R063_26	female	36	non-Severe	2020-02-01	2020-02-08	2020-01-28	2020-02-22	22	26	NA	NA	NA	NA	NA	NA	NA	NA	NA	NA	NA	NA	NA	NA	NA	NA	positive	negative	NA	NA	NA	NA	NA	NA	NA	NA	NA	NA	NA	NA	NA	NA	NA	NA	NA	NA	NA	NA
R063	50151128	R063_31	female	36	non-Severe	2020-02-01	2020-02-08	2020-01-28	2020-02-27	27	31	NA	NA	NA	NA	NA	NA	NA	NA	NA	NA	NA	NA	NA	NA	NA	NA	negative	negative	NA	NA	NA	NA	NA	NA	NA	NA	NA	NA	NA	NA	NA	NA	NA	NA	NA	NA	NA	NA
R063	50151128	R063_33	female	36	non-Severe	2020-02-01	2020-02-08	2020-01-28	2020-02-29	29	33	NA	NA	NA	NA	NA	NA	NA	NA	NA	NA	NA	NA	NA	NA	NA	NA	negative	negative	NA	NA	NA	NA	NA	NA	NA	NA	NA	NA	NA	NA	NA	NA	NA	NA	NA	NA	NA	NA
R063	50151128	R063_379	female	36	non-Severe	2020-02-01	2020-02-08	2020-01-28	2021-02-09	375	379	0	No	No	No	0	NA	NA	NA	NA	NA	NA	NA	Yes	NA	NA	NA	NA	NA	negative	61	112	46	3.94	281	7	1.006	NA	negative	NA	negative	negative	negative	negative	negative	negative	NA	NA	0
R063	50151128	R063_5	female	36	non-Severe	2020-02-01	2020-02-08	2020-01-28	2020-02-01	1	5	NA	NA	NA	NA	NA	NA	NA	NA	NA	NA	NA	NA	NA	NA	NA	NA	NA	negative	NA	80	82	42.6	3.53	253	5.5	1.03	negative	negative	+-	negative	negative	negative	negative	negative	negative	0	2	13
R063	50151128	R063_50	female	36	non-Severe	2020-02-01	2020-02-08	2020-01-28	2020-03-17	46	50	NA	NA	NA	NA	NA	NA	NA	NA	NA	NA	NA	NA	NA	NA	NA	NA	NA	negative	negative	74	94	NA	2.81	314	6	1.01	negative	negative	negative	negative	negative	negative	negative	negative	negative	0	0	2
R063	50151128	R063_6	female	36	non-Severe	2020-02-01	2020-02-08	2020-01-28	2020/2/2	2	6	NA	NA	NA	NA	NA	NA	NA	Yes	NA	Yes	NA	Yes	Yes	Yes	Yes	NA	NA	NA	NA	NA	NA	NA	NA	NA	NA	NA	NA	NA	NA	NA	NA	NA	NA	NA	NA	NA	NA	NA
R063	50151128	R063_9	female	36	non-Severe	2020-02-01	2020-02-08	2020-01-28	2020-02-05	5	9	NA	NA	NA	NA	NA	NA	NA	NA	NA	NA	NA	NA	NA	NA	NA	NA	NA	negative	negative	NA	NA	NA	NA	NA	NA	NA	NA	NA	NA	NA	NA	NA	NA	NA	NA	NA	NA	NA
R064	50151129	R064_15	male	39	non-Severe	2020-02-01	2020-02-13	2020-01-25	2020-02-08	8	15	NA	NA	NA	NA	NA	NA	NA	NA	NA	NA	NA	NA	NA	NA	NA	NA	NA	NA	negative	NA	NA	NA	NA	NA	NA	NA	NA	NA	NA	NA	NA	NA	NA	NA	NA	NA	NA	NA
R064	50151129	R064_16	male	39	non-Severe	2020-02-01	2020-02-13	2020-01-25	2020-02-09	9	16	NA	NA	NA	NA	NA	NA	NA	NA	NA	NA	NA	NA	NA	NA	NA	NA	NA	NA	negative	NA	NA	NA	NA	NA	NA	NA	NA	NA	NA	NA	NA	NA	NA	NA	NA	NA	NA	NA
R064	50151129	R064_17	male	39	non-Severe	2020-02-01	2020-02-13	2020-01-25	2020/2/10	10	17	1	Yes	No	Yes	5	NA	NA	NA	NA	NA	NA	NA	NA	NA	NA	NA	NA	NA	NA	NA	NA	NA	NA	NA	NA	NA	NA	NA	NA	NA	NA	NA	NA	NA	NA	NA	NA	NA
R064	50151129	R064_18	male	39	non-Severe	2020-02-01	2020-02-13	2020-01-25	2020-02-11	11	18	NA	NA	NA	NA	NA	NA	NA	NA	NA	NA	NA	NA	NA	NA	NA	NA	NA	NA	NA	88	95	NA	4.22	369	NA	NA	NA	NA	NA	NA	NA	NA	NA	NA	NA	NA	NA	NA
R064	50151129	R064_19	male	39	non-Severe	2020-02-01	2020-02-13	2020-01-25	2020-02-12	12	19	NA	NA	NA	NA	NA	NA	NA	NA	NA	NA	NA	NA	NA	NA	NA	NA	NA	negative	NA	NA	NA	NA	NA	NA	NA	NA	NA	NA	NA	NA	NA	NA	NA	NA	NA	NA	NA	NA
R064	50151129	R064_20	male	39	non-Severe	2020-02-01	2020-02-13	2020-01-25	2020-02-13	13	20	NA	NA	NA	NA	NA	NA	NA	NA	NA	NA	NA	NA	NA	NA	NA	NA	NA	NA	NA	NA	NA	NA	NA	NA	NA	NA	NA	NA	NA	NA	NA	NA	NA	NA	NA	NA	NA	NA
R064	50151129	R064_34	male	39	non-Severe	2020-02-01	2020-02-13	2020-01-25	2020-02-27	27	34	NA	NA	NA	NA	NA	NA	NA	NA	NA	NA	NA	NA	NA	NA	NA	NA	negative	NA	NA	96	85	NA	6.01	408	5	1.03	negative	negative	negative	negative	negative	negative	negative	negative	negative	NA	0	0
R064	50151129	R064_381	male	39	non-Severe	2020-02-01	2020-02-13	2020-01-25	2021-02-08	374	381	1	No	No	Yes	4	NA	NA	NA	NA	NA	NA	NA	Yes	NA	NA	NA	NA	NA	negative	80	105	54.3	6.9	475	5.5	1.025	NA	negative	NA	negative	negative	negative	negative	negative	negative	NA	NA	4
R064	50151129	R064_8	male	39	non-Severe	2020-02-01	2020-02-13	2020-01-25	2020-02-01	1	8	NA	NA	NA	NA	NA	NA	NA	NA	NA	NA	NA	NA	NA	NA	NA	NA	NA	negative	NA	91	91	34.1	4.6	342	5	1.025	negative	negative	negative	negative	negative	negative	negative	negative	negative	0	3	14
R064	50151129	R064_9	male	39	non-Severe	2020-02-01	2020-02-13	2020-01-25	2020-02-02	2	9	NA	NA	NA	NA	NA	NA	NA	NA	NA	Yes	NA	Yes	Yes	Yes	Yes	NA	NA	NA	NA	NA	NA	NA	NA	NA	NA	NA	NA	NA	NA	NA	NA	NA	NA	NA	NA	NA	NA	NA
R065	50151142	R065_10	male	75	Severe	2020-02-02	2020-03-09	2020-01-24	2020-02-02	1	10	NA	NA	NA	NA	NA	NA	NA	NA	NA	NA	NA	NA	NA	NA	NA	NA	NA	positive	NA	NA	NA	NA	NA	NA	6.5	1.015	negative	negative	+-	negative	negative	negative	negative	negative	negative	0	3	15
R065	50151142	R065_11	male	75	Severe	2020-02-02	2020-03-09	2020-01-24	2020-02-03	2	11	NA	NA	NA	NA	NA	Yes	NA	Yes	Yes	NA	Yes	NA	NA	NA	NA	NA	NA	NA	NA	76	85	14.7	2.09	188	NA	NA	NA	NA	NA	NA	NA	NA	NA	NA	NA	NA	NA	NA
R065	50151142	R065_12	male	75	Severe	2020-02-02	2020-03-09	2020-01-24	2020-02-04	3	12	NA	NA	NA	NA	NA	NA	NA	NA	NA	NA	NA	NA	NA	NA	NA	NA	NA	NA	NA	NA	NA	NA	NA	NA	NA	NA	NA	NA	NA	NA	NA	NA	NA	NA	NA	NA	NA	NA
R065	50151142	R065_13	male	75	Severe	2020-02-02	2020-03-09	2020-01-24	2020-02-05	4	13	5	Yes	Yes	Yes	11	NA	NA	NA	NA	NA	NA	Yes	NA	Yes	Yes	NA	NA	negative	NA	NA	NA	NA	NA	NA	NA	NA	NA	NA	NA	NA	NA	NA	NA	NA	NA	NA	NA	NA
R065	50151142	R065_14	male	75	Severe	2020-02-02	2020-03-09	2020-01-24	2020-02-06	5	14	NA	NA	NA	NA	NA	NA	NA	Yes	Yes	NA	NA	NA	NA	NA	NA	NA	NA	NA	NA	77.5	83.5	29.15	5.35	255	NA	NA	NA	NA	NA	NA	NA	NA	NA	NA	NA	NA	NA	NA
R065	50151142	R065_15	male	75	Severe	2020-02-02	2020-03-09	2020-01-24	2020/2/7	6	15	NA	NA	NA	NA	NA	NA	NA	NA	NA	Yes	NA	NA	NA	NA	NA	NA	NA	NA	NA	NA	NA	NA	NA	NA	NA	NA	NA	NA	NA	NA	NA	NA	NA	NA	NA	NA	NA	NA
R065	50151142	R065_16	male	75	Severe	2020-02-02	2020-03-09	2020-01-24	2020-02-08	7	16	NA	NA	NA	NA	NA	NA	NA	NA	NA	NA	NA	NA	NA	NA	NA	NA	NA	NA	negative	NA	NA	NA	NA	NA	NA	NA	NA	NA	NA	NA	NA	NA	NA	NA	NA	NA	NA	NA
R065	50151142	R065_17	male	75	Severe	2020-02-02	2020-03-09	2020-01-24	2020-02-09	8	17	NA	NA	NA	NA	NA	NA	NA	Yes	Yes	NA	NA	NA	NA	NA	NA	NA	NA	NA	positive	NA	NA	NA	NA	NA	NA	NA	NA	NA	NA	NA	NA	NA	NA	NA	NA	NA	NA	NA
R065	50151142	R065_18	male	75	Severe	2020-02-02	2020-03-09	2020-01-24	2020-02-10	9	18	NA	NA	NA	NA	NA	NA	NA	Yes	Yes	NA	NA	NA	NA	NA	NA	NA	NA	NA	NA	78	84	45.4	7.56	161	NA	NA	NA	NA	NA	NA	NA	NA	NA	NA	NA	NA	NA	NA
R065	50151142	R065_19	male	75	Severe	2020-02-02	2020-03-09	2020-01-24	2020-02-11	10	19	NA	NA	NA	NA	NA	NA	NA	NA	NA	NA	NA	NA	NA	NA	NA	NA	NA	NA	positive	NA	NA	NA	NA	NA	NA	NA	NA	NA	NA	NA	NA	NA	NA	NA	NA	NA	NA	NA
R065	50151142	R065_20	male	75	Severe	2020-02-02	2020-03-09	2020-01-24	2020-02-12	11	20	NA	NA	NA	NA	NA	NA	NA	NA	NA	NA	NA	NA	NA	NA	NA	NA	NA	NA	NA	NA	NA	NA	NA	NA	NA	NA	NA	NA	NA	NA	NA	NA	NA	NA	NA	NA	NA	NA
R065	50151142	R065_21	male	75	Severe	2020-02-02	2020-03-09	2020-01-24	2020-02-13	12	21	NA	NA	NA	NA	NA	NA	NA	NA	NA	NA	NA	NA	NA	NA	NA	NA	NA	NA	NA	NA	NA	NA	NA	NA	NA	NA	NA	NA	NA	NA	NA	NA	NA	NA	NA	NA	NA	NA
R065	50151142	R065_23	male	75	Severe	2020-02-02	2020-03-09	2020-01-24	2020-02-15	14	23	NA	NA	NA	NA	NA	NA	NA	Yes	Yes	NA	NA	NA	NA	NA	NA	NA	positive	NA	positive	87	75	NA	7.62	349	NA	NA	NA	NA	NA	NA	NA	NA	NA	NA	NA	NA	NA	NA
R065	50151142	R065_24	male	75	Severe	2020-02-02	2020-03-09	2020-01-24	2020-02-16	15	24	NA	NA	NA	NA	NA	NA	NA	NA	NA	NA	NA	NA	NA	NA	NA	NA	NA	NA	NA	NA	NA	NA	NA	NA	NA	NA	NA	NA	NA	NA	NA	NA	NA	NA	NA	NA	NA	NA
R065	50151142	R065_25	male	75	Severe	2020-02-02	2020-03-09	2020-01-24	2020-02-17	16	25	NA	NA	NA	NA	NA	NA	NA	NA	NA	NA	NA	NA	NA	NA	NA	NA	NA	NA	NA	NA	NA	NA	NA	NA	NA	NA	NA	NA	NA	NA	NA	NA	NA	NA	NA	NA	NA	NA
R065	50151142	R065_27	male	75	Severe	2020-02-02	2020-03-09	2020-01-24	2020-02-19	18	27	NA	NA	NA	NA	NA	NA	NA	Yes	Yes	NA	NA	NA	NA	NA	NA	NA	positive	NA	NA	83	79	68.4	6.11	342	NA	NA	NA	NA	NA	NA	NA	NA	NA	NA	NA	NA	NA	NA
R065	50151142	R065_28	male	75	Severe	2020-02-02	2020-03-09	2020-01-24	2020-02-20	19	28	NA	NA	NA	NA	NA	NA	NA	Yes	Yes	NA	NA	NA	NA	NA	NA	NA	NA	NA	NA	NA	NA	NA	NA	NA	NA	NA	NA	NA	NA	NA	NA	NA	NA	NA	NA	NA	NA	NA
R065	50151142	R065_29	male	75	Severe	2020-02-02	2020-03-09	2020-01-24	2020-02-21	20	29	5	Yes	Yes	Yes	11	NA	NA	NA	NA	NA	NA	NA	NA	NA	NA	negative	positive	NA	NA	NA	NA	NA	NA	NA	NA	NA	NA	NA	NA	NA	NA	NA	NA	NA	NA	NA	NA	NA
R065	50151142	R065_30	male	75	Severe	2020-02-02	2020-03-09	2020-01-24	2020-02-22	21	30	NA	NA	NA	NA	NA	NA	NA	Yes	Yes	NA	NA	NA	NA	NA	NA	NA	NA	NA	NA	82	80	52.9	5.12	338	NA	NA	NA	NA	NA	NA	NA	NA	NA	NA	NA	NA	NA	NA
R065	50151142	R065_31	male	75	Severe	2020-02-02	2020-03-09	2020-01-24	2020-02-23	22	31	NA	NA	NA	NA	NA	NA	NA	Yes	Yes	NA	NA	NA	NA	NA	NA	NA	NA	NA	NA	80	83	48.4	5.08	296	NA	NA	NA	NA	NA	NA	NA	NA	NA	NA	NA	NA	NA	NA
R065	50151142	R065_34	male	75	Severe	2020-02-02	2020-03-09	2020-01-24	2020-02-26	25	34	NA	NA	NA	NA	NA	NA	NA	Yes	Yes	NA	NA	NA	NA	NA	NA	NA	negative	negative	NA	77	84	38.3	4.01	283	NA	NA	NA	NA	NA	NA	NA	NA	NA	NA	NA	NA	NA	NA
R065	50151142	R065_36	male	75	Severe	2020-02-02	2020-03-09	2020-01-24	2020-02-28	27	36	NA	NA	NA	NA	NA	NA	NA	NA	NA	NA	NA	NA	NA	NA	NA	NA	negative	negative	NA	NA	NA	NA	NA	NA	NA	NA	NA	NA	NA	NA	NA	NA	NA	NA	NA	NA	NA	NA
R065	50151142	R065_37	male	75	Severe	2020-02-02	2020-03-09	2020-01-24	2020-02-29	28	37	NA	NA	NA	NA	NA	NA	NA	Yes	Yes	NA	NA	NA	NA	NA	NA	NA	NA	NA	NA	83	79	36.6	3.96	300	NA	NA	NA	NA	NA	NA	NA	NA	NA	NA	NA	NA	NA	NA
R065	50151142	R065_38	male	75	Severe	2020-02-02	2020-03-09	2020-01-24	2020-03-01	29	38	NA	NA	NA	NA	NA	NA	NA	NA	NA	NA	NA	NA	NA	NA	NA	NA	positive	negative	NA	NA	NA	NA	NA	NA	NA	NA	NA	NA	NA	NA	NA	NA	NA	NA	NA	NA	NA	NA
R065	50151142	R065_39	male	75	Severe	2020-02-02	2020-03-09	2020-01-24	2020-03-02	30	39	NA	NA	NA	NA	NA	NA	NA	NA	NA	NA	NA	NA	NA	NA	NA	NA	positive	negative	NA	NA	NA	NA	NA	NA	NA	NA	NA	NA	NA	NA	NA	NA	NA	NA	NA	NA	NA	NA
R065	50151142	R065_41	male	75	Severe	2020-02-02	2020-03-09	2020-01-24	2020-03-04	32	41	2	No	Yes	Yes	7	NA	NA	Yes	Yes	NA	NA	NA	NA	NA	NA	NA	NA	NA	NA	NA	NA	NA	NA	NA	NA	NA	NA	NA	NA	NA	NA	NA	NA	NA	NA	NA	NA	NA
R065	50151142	R065_43	male	75	Severe	2020-02-02	2020-03-09	2020-01-24	2020-03-06	34	43	NA	NA	NA	NA	NA	NA	NA	NA	NA	NA	NA	NA	NA	NA	NA	NA	NA	negative	NA	NA	NA	NA	NA	NA	NA	NA	NA	NA	NA	NA	NA	NA	NA	NA	NA	NA	NA	NA
R065	50151142	R065_44	male	75	Severe	2020-02-02	2020-03-09	2020-01-24	2020-03-07	35	44	NA	NA	NA	NA	NA	NA	NA	NA	NA	NA	NA	NA	NA	NA	NA	NA	negative	NA	NA	NA	NA	NA	NA	NA	NA	NA	NA	NA	NA	NA	NA	NA	NA	NA	NA	NA	NA	NA
R065	50151142	R065_45	male	75	Severe	2020-02-02	2020-03-09	2020-01-24	2020-03-08	36	45	NA	NA	NA	NA	NA	NA	NA	NA	NA	NA	NA	NA	NA	NA	NA	negative	NA	NA	NA	NA	NA	NA	NA	NA	NA	NA	NA	NA	NA	NA	NA	NA	NA	NA	NA	NA	NA	NA
R065	50151142	R065_46	male	75	Severe	2020-02-02	2020-03-09	2020-01-24	2020-03-09	37	46	NA	NA	NA	NA	NA	NA	NA	Yes	Yes	NA	NA	NA	NA	NA	NA	NA	NA	NA	NA	NA	NA	NA	NA	NA	NA	NA	NA	NA	NA	NA	NA	NA	NA	NA	NA	NA	NA	NA
R065	50151142	R065_60	male	75	Severe	2020-02-02	2020-03-09	2020-01-24	2020-03-23	51	60	NA	NA	NA	NA	NA	NA	NA	NA	NA	NA	NA	NA	NA	NA	NA	NA	negative	negative	NA	NA	NA	NA	NA	NA	NA	NA	NA	NA	NA	NA	NA	NA	NA	NA	NA	NA	NA	NA
R065	50151142	R065_74	male	75	Severe	2020-02-02	2020-03-09	2020-01-24	2020-04-06	65	74	NA	NA	NA	NA	NA	NA	NA	NA	NA	NA	NA	NA	NA	NA	NA	NA	negative	negative	NA	84	78	45	5.16	301	6	1.015	negative	negative	negative	negative	negative	negative	negative	negative	negative	0	0	1
R066	50151149	R066_11	female	48	non-Severe	2020-02-02	2020-02-12	2020-01-30	2020-02-09	8	11	NA	NA	NA	NA	NA	NA	NA	NA	NA	NA	NA	NA	NA	NA	NA	NA	NA	NA	negative	NA	NA	NA	NA	NA	NA	NA	NA	NA	NA	NA	NA	NA	NA	NA	NA	NA	NA	NA
R066	50151149	R066_12	female	48	non-Severe	2020-02-02	2020-02-12	2020-01-30	2020-02-10	9	12	0	No	No	No	0	NA	NA	NA	NA	NA	NA	NA	NA	NA	NA	NA	NA	NA	negative	NA	NA	NA	NA	NA	NA	NA	NA	NA	NA	NA	NA	NA	NA	NA	NA	NA	NA	NA
R066	50151149	R066_13	female	48	non-Severe	2020-02-02	2020-02-12	2020-01-30	2020-02-11	10	13	NA	NA	NA	NA	NA	NA	NA	NA	NA	NA	NA	NA	NA	NA	NA	NA	NA	negative	NA	64	99	38.9	3.58	149	NA	NA	NA	NA	NA	NA	NA	NA	NA	NA	NA	NA	NA	NA
R066	50151149	R066_28	female	48	non-Severe	2020-02-02	2020-02-12	2020-01-30	2020-02-26	25	28	NA	NA	NA	NA	NA	NA	NA	NA	NA	NA	NA	NA	NA	NA	NA	NA	NA	negative	negative	63	101	50.4	3.68	244	5	1.03	negative	2+	negative	negative	negative	negative	+-	negative	negative	NA	6	30
R066	50151149	R066_376	female	48	non-Severe	2020-02-02	2020-02-12	2020-01-30	2021-02-08	373	376	0	No	No	No	0	NA	NA	NA	NA	NA	NA	NA	Yes	NA	NA	NA	negative	NA	NA	42	116	47.6	4.74	208	5.5	1.013	NA	negative	NA	negative	negative	negative	negative	negative	negative	NA	NA	0
R066	50151149	R066_4	female	48	non-Severe	2020-02-02	2020-02-12	2020-01-30	2020-02-02	1	4	NA	NA	NA	NA	NA	NA	NA	NA	NA	NA	NA	NA	NA	NA	NA	NA	NA	negative	NA	62	103	40.1	3.7	173	5.5	1.03	negative	negative	negative	negative	negative	negative	negative	negative	negative	0	4	20
R066	50151149	R066_5	female	48	non-Severe	2020-02-02	2020-02-12	2020-01-30	2020-02-03	2	5	NA	NA	NA	NA	NA	NA	NA	Yes	NA	Yes	NA	NA	NA	NA	NA	NA	NA	NA	NA	NA	NA	NA	NA	NA	NA	NA	NA	NA	NA	NA	NA	NA	NA	NA	NA	NA	NA	NA
R066	50151149	R066_6	female	48	non-Severe	2020-02-02	2020-02-12	2020-01-30	2020/2/4	3	6	NA	NA	NA	NA	NA	NA	NA	NA	NA	NA	NA	Yes	Yes	Yes	Yes	NA	NA	NA	NA	NA	NA	NA	NA	NA	NA	NA	NA	NA	NA	NA	NA	NA	NA	NA	NA	NA	NA	NA
R067	50151150	R067_10	female	45	non-Severe	2020-02-02	2020-02-15	2020-01-24	2020-02-02	1	10	NA	NA	NA	NA	NA	NA	NA	NA	NA	NA	NA	NA	NA	NA	NA	NA	NA	negative	NA	69	92	23.1	2.81	221	6	1.02	negative	negative	negative	negative	negative	negative	negative	negative	negative	0	2	9
R067	50151150	R067_115	female	45	non-Severe	2020-02-02	2020-02-15	2020-01-24	2020-05-17	106	115	NA	NA	NA	NA	NA	NA	NA	NA	NA	NA	NA	NA	NA	NA	NA	NA	NA	negative	negative	NA	NA	NA	NA	NA	NA	NA	NA	NA	NA	NA	NA	NA	NA	NA	NA	NA	NA	NA
R067	50151150	R067_17	female	45	non-Severe	2020-02-02	2020-02-15	2020-01-24	2020-02-09	8	17	NA	NA	NA	NA	NA	NA	NA	NA	NA	NA	NA	NA	NA	NA	NA	NA	NA	NA	negative	NA	NA	NA	NA	NA	NA	NA	NA	NA	NA	NA	NA	NA	NA	NA	NA	NA	NA	NA
R067	50151150	R067_18	female	45	non-Severe	2020-02-02	2020-02-15	2020-01-24	2020-02-10	9	18	3	Yes	No	Yes	7	NA	NA	NA	NA	NA	NA	NA	NA	NA	NA	NA	NA	NA	negative	NA	NA	NA	NA	NA	NA	NA	NA	NA	NA	NA	NA	NA	NA	NA	NA	NA	NA	NA
R067	50151150	R067_19	female	45	non-Severe	2020-02-02	2020-02-15	2020-01-24	2020-02-11	10	19	NA	NA	NA	NA	NA	NA	NA	NA	NA	NA	NA	NA	NA	NA	NA	NA	NA	NA	NA	66	97	32.3	3.34	231	NA	NA	NA	NA	NA	NA	NA	NA	NA	NA	NA	NA	NA	NA
R067	50151150	R067_22	female	45	non-Severe	2020-02-02	2020-02-15	2020-01-24	2020-02-14	13	22	NA	NA	NA	NA	NA	NA	NA	NA	NA	NA	NA	NA	NA	NA	NA	NA	NA	positive	NA	NA	NA	NA	NA	NA	NA	NA	NA	NA	NA	NA	NA	NA	NA	NA	NA	NA	NA	NA
R067	50151150	R067_33	female	45	non-Severe	2020-02-02	2020-02-15	2020-01-24	2020-02-25	24	33	NA	NA	NA	NA	NA	NA	NA	NA	NA	NA	NA	NA	NA	NA	NA	NA	NA	NA	negative	NA	NA	NA	NA	NA	NA	NA	NA	NA	NA	NA	NA	NA	NA	NA	NA	NA	NA	NA
R067	50151150	R067_38	female	45	non-Severe	2020-02-02	2020-02-15	2020-01-24	2020-03-01	29	38	NA	NA	NA	NA	NA	NA	NA	NA	NA	NA	NA	NA	NA	NA	NA	NA	negative	negative	NA	61	105	45.2	3.72	289	5.5	1.015	negative	negative	negative	negative	negative	negative	negative	negative	negative	NA	0	0
R067	50151150	R067_39	female	45	non-Severe	2020-02-02	2020-02-15	2020-01-24	2020-03-02	30	39	NA	NA	NA	NA	NA	NA	NA	NA	NA	NA	NA	NA	NA	NA	NA	NA	NA	NA	NA	NA	NA	NA	NA	NA	NA	NA	NA	NA	NA	NA	NA	NA	NA	NA	NA	NA	NA	NA
R067	50151150	R067_60	female	45	non-Severe	2020-02-02	2020-02-15	2020-01-24	2020-03-23	51	60	NA	NA	NA	NA	NA	NA	NA	NA	NA	NA	NA	NA	NA	NA	NA	NA	negative	negative	NA	NA	NA	NA	NA	NA	NA	NA	NA	NA	NA	NA	NA	NA	NA	NA	NA	NA	NA	NA
R067	50151150	R067_9	female	45	non-Severe	2020-02-02	2020-02-15	2020-01-24	2020-02-01	0	9	NA	NA	NA	NA	NA	NA	NA	NA	NA	NA	NA	NA	NA	NA	NA	NA	positive	NA	positive	NA	NA	NA	NA	NA	NA	NA	NA	NA	NA	NA	NA	NA	NA	NA	NA	NA	NA	NA
R068	50151152	R068_11	male	47	non-Severe	2020-02-02	2020-02-18	2020-01-30	2020-02-09	8	11	NA	NA	NA	NA	NA	NA	NA	NA	NA	NA	NA	NA	NA	NA	NA	NA	NA	NA	negative	NA	NA	NA	NA	NA	NA	NA	NA	NA	NA	NA	NA	NA	NA	NA	NA	NA	NA	NA
R068	50151152	R068_12	male	47	non-Severe	2020-02-02	2020-02-18	2020-01-30	2020-02-10	9	12	5	Yes	No	Yes	9	NA	NA	NA	NA	NA	NA	NA	NA	NA	NA	NA	NA	NA	negative	NA	NA	NA	NA	NA	NA	NA	NA	NA	NA	NA	NA	NA	NA	NA	NA	NA	NA	NA
R068	50151152	R068_13	male	47	non-Severe	2020-02-02	2020-02-18	2020-01-30	2020-02-11	10	13	NA	NA	NA	NA	NA	NA	NA	NA	NA	NA	NA	NA	NA	NA	NA	NA	NA	NA	NA	77	103	45.8	3.23	426	NA	NA	NA	NA	NA	NA	NA	NA	NA	NA	NA	NA	NA	NA
R068	50151152	R068_17	male	47	non-Severe	2020-02-02	2020-02-18	2020-01-30	2020/2/15	14	17	5	Yes	No	Yes	9	NA	NA	NA	NA	NA	NA	NA	NA	NA	NA	NA	NA	NA	NA	NA	NA	NA	NA	NA	NA	NA	NA	NA	NA	NA	NA	NA	NA	NA	NA	NA	NA	NA
R068	50151152	R068_18	male	47	non-Severe	2020-02-02	2020-02-18	2020-01-30	2020-02-16	15	18	NA	NA	NA	NA	NA	NA	NA	NA	NA	NA	NA	NA	NA	NA	NA	NA	NA	negative	NA	NA	NA	NA	NA	NA	NA	NA	NA	NA	NA	NA	NA	NA	NA	NA	NA	NA	NA	NA
R068	50151152	R068_19	male	47	non-Severe	2020-02-02	2020-02-18	2020-01-30	2020-02-17	16	19	NA	NA	NA	NA	NA	NA	NA	NA	NA	NA	NA	NA	NA	NA	NA	NA	NA	negative	NA	NA	NA	NA	NA	NA	NA	NA	NA	NA	NA	NA	NA	NA	NA	NA	NA	NA	NA	NA
R068	50151152	R068_20	male	47	non-Severe	2020-02-02	2020-02-18	2020-01-30	2020-02-18	17	20	NA	NA	NA	NA	NA	NA	NA	NA	NA	NA	NA	NA	NA	NA	NA	NA	NA	NA	NA	NA	NA	NA	NA	NA	NA	NA	NA	NA	NA	NA	NA	NA	NA	NA	NA	NA	NA	NA
R068	50151152	R068_34	male	47	non-Severe	2020-02-02	2020-02-18	2020-01-30	2020-03-03	31	34	NA	NA	NA	NA	NA	NA	NA	NA	NA	NA	NA	NA	NA	NA	NA	NA	negative	NA	NA	78	102	NA	5.08	393	5	1.03	negative	negative	negative	negative	negative	negative	negative	negative	negative	0	1	8
R068	50151152	R068_376	male	47	non-Severe	2020-02-02	2020-02-18	2020-01-30	2021-02-08	373	376	0	No	No	No	0	NA	NA	NA	NA	NA	NA	NA	Yes	NA	NA	NA	NA	NA	negative	54	118	51	7.89	395	6	1.034	NA	negative	NA	negative	negative	negative	negative	negative	negative	NA	NA	0
R068	50151152	R068_4	male	47	non-Severe	2020-02-02	2020-02-18	2020-01-30	2020-02-02	1	4	NA	NA	NA	NA	NA	NA	NA	NA	NA	NA	NA	NA	NA	NA	NA	NA	NA	negative	NA	75	104	31.8	4.7	266	5.5	1.025	3+	negative	negative	2+	negative	negative	negative	negative	negative	0	2	10
R068	50151152	R068_5	male	47	non-Severe	2020-02-02	2020-02-18	2020-01-30	2020/2/3	2	5	NA	NA	NA	NA	NA	NA	NA	Yes	NA	Yes	NA	Yes	Yes	Yes	Yes	NA	NA	NA	NA	NA	NA	NA	NA	NA	NA	NA	NA	NA	NA	NA	NA	NA	NA	NA	NA	NA	NA	NA
R068	50151152	R068_6	male	47	non-Severe	2020-02-02	2020-02-18	2020-01-30	2020-02-04	3	6	NA	NA	NA	NA	NA	NA	NA	NA	NA	NA	NA	NA	NA	NA	NA	NA	NA	NA	NA	NA	NA	NA	NA	NA	NA	NA	NA	NA	NA	NA	NA	NA	NA	NA	NA	NA	NA	NA
R069	50151153	R069_24	male	62	Severe	2020-02-02	2020-02-23	2020-01-10	2020-02-02	1	24	NA	NA	NA	NA	NA	NA	NA	NA	NA	NA	NA	NA	NA	NA	NA	NA	NA	positive	NA	72	95	31.7	4.3	197	6.5	1.01	negative	negative	negative	negative	negative	negative	negative	negative	negative	0	1	3
R069	50151153	R069_25	male	62	Severe	2020-02-02	2020-02-23	2020-01-10	2020/2/3	2	25	NA	NA	NA	NA	NA	Yes	NA	Yes	NA	NA	Yes	NA	NA	NA	Yes	NA	NA	NA	NA	NA	NA	NA	NA	NA	NA	NA	NA	NA	NA	NA	NA	NA	NA	NA	NA	NA	NA	NA
R069	50151153	R069_26	male	62	Severe	2020-02-02	2020-02-23	2020-01-10	2020-02-04	3	26	4	Yes	Yes	No	7	NA	NA	NA	NA	NA	NA	NA	NA	NA	NA	NA	NA	NA	NA	NA	NA	NA	NA	NA	NA	NA	NA	NA	NA	NA	NA	NA	NA	NA	NA	NA	NA	NA
R069	50151153	R069_27	male	62	Severe	2020-02-02	2020-02-23	2020-01-10	2020-02-05	4	27	NA	NA	NA	NA	NA	NA	NA	NA	NA	NA	NA	NA	NA	NA	NA	NA	NA	NA	NA	NA	NA	NA	NA	NA	NA	NA	NA	NA	NA	NA	NA	NA	NA	NA	NA	NA	NA	NA
R069	50151153	R069_32	male	62	Severe	2020-02-02	2020-02-23	2020-01-10	2020-02-10	9	32	NA	NA	NA	NA	NA	NA	NA	NA	NA	NA	NA	NA	NA	NA	NA	NA	NA	NA	NA	NA	NA	NA	NA	NA	NA	NA	NA	NA	NA	NA	NA	NA	NA	NA	NA	NA	NA	NA
R069	50151153	R069_33	male	62	Severe	2020-02-02	2020-02-23	2020-01-10	2020-02-11	10	33	5	Yes	Yes	Yes	11	NA	NA	NA	NA	NA	NA	NA	NA	NA	NA	NA	NA	NA	NA	66	98	40.5	4.5	165	NA	NA	NA	NA	NA	NA	NA	NA	NA	NA	NA	NA	NA	NA
R069	50151153	R069_36	male	62	Severe	2020-02-02	2020-02-23	2020-01-10	2020-02-14	13	36	NA	NA	NA	NA	NA	NA	NA	NA	NA	NA	NA	NA	NA	NA	NA	NA	NA	NA	negative	NA	NA	NA	NA	NA	NA	NA	NA	NA	NA	NA	NA	NA	NA	NA	NA	NA	NA	NA
R069	50151153	R069_37	male	62	Severe	2020-02-02	2020-02-23	2020-01-10	2020-02-15	14	37	NA	NA	NA	NA	NA	NA	NA	NA	NA	NA	NA	NA	NA	NA	NA	NA	NA	NA	negative	NA	NA	NA	NA	NA	NA	NA	NA	NA	NA	NA	NA	NA	NA	NA	NA	NA	NA	NA
R069	50151153	R069_38	male	62	Severe	2020-02-02	2020-02-23	2020-01-10	2020-02-16	15	38	NA	NA	NA	NA	NA	NA	NA	NA	NA	NA	NA	NA	NA	NA	NA	NA	NA	NA	NA	70	96	33.2	3.3	205	NA	NA	NA	NA	NA	NA	NA	NA	NA	NA	NA	NA	NA	NA
R069	50151153	R069_41	male	62	Severe	2020-02-02	2020-02-23	2020-01-10	2020-02-19	18	41	NA	NA	NA	NA	NA	NA	NA	NA	NA	NA	NA	NA	NA	NA	NA	NA	NA	NA	negative	NA	NA	NA	NA	NA	NA	NA	NA	NA	NA	NA	NA	NA	NA	NA	NA	NA	NA	NA
R069	50151153	R069_42	male	62	Severe	2020-02-02	2020-02-23	2020-01-10	2020-02-20	19	42	4	Yes	No	Yes	8	NA	NA	NA	NA	NA	NA	NA	NA	NA	NA	NA	NA	negative	negative	66	98	NA	2.21	189	NA	NA	NA	NA	NA	NA	NA	NA	NA	NA	NA	NA	NA	NA
R069	50151153	R069_45	male	62	Severe	2020-02-02	2020-02-23	2020-01-10	2020-02-23	22	45	NA	NA	NA	NA	NA	NA	NA	NA	NA	NA	NA	NA	NA	NA	NA	NA	negative	NA	NA	NA	NA	NA	NA	NA	NA	NA	NA	NA	NA	NA	NA	NA	NA	NA	NA	NA	NA	NA
R069	50151153	R069_47	male	62	Severe	2020-02-02	2020-02-23	2020-01-10	2020-02-25	24	47	NA	NA	NA	NA	NA	NA	NA	NA	NA	NA	NA	NA	NA	NA	NA	NA	NA	NA	NA	NA	NA	NA	NA	NA	NA	NA	NA	NA	NA	NA	NA	NA	NA	NA	NA	NA	NA	NA
R069	50151153	R069_59	male	62	Severe	2020-02-02	2020-02-23	2020-01-10	2020-03-08	36	59	NA	NA	NA	NA	NA	NA	NA	NA	NA	NA	NA	NA	NA	NA	NA	NA	negative	negative	NA	68	97	53.7	3.38	328	7	1.02	negative	negative	negative	negative	negative	negative	negative	negative	negative	0	0	0
R070	50151155	R070_17	female	86	non-Severe	2020-02-02	2020-03-02	2020-01-17	2020-02-02	1	17	NA	NA	NA	NA	NA	NA	NA	NA	Yes	NA	NA	NA	NA	NA	NA	NA	NA	NA	NA	80	58	18.4	5.26	274	NA	NA	NA	NA	NA	NA	NA	NA	NA	NA	NA	NA	NA	NA
R070	50151155	R070_18	female	86	non-Severe	2020-02-02	2020-03-02	2020-01-17	2020/2/3	2	18	4	Yes	Yes	No	7	NA	NA	NA	NA	NA	NA	NA	NA	NA	NA	NA	negative	NA	NA	NA	NA	NA	NA	NA	NA	NA	NA	NA	NA	NA	NA	NA	NA	NA	NA	NA	NA	NA
R070	50151155	R070_19	female	86	non-Severe	2020-02-02	2020-03-02	2020-01-17	2020-02-04	3	19	NA	NA	NA	NA	NA	NA	NA	NA	NA	NA	NA	NA	NA	NA	NA	NA	NA	NA	NA	NA	NA	NA	NA	NA	NA	NA	NA	NA	NA	NA	NA	NA	NA	NA	NA	NA	NA	NA
R070	50151155	R070_20	female	86	non-Severe	2020-02-02	2020-03-02	2020-01-17	2020-02-05	4	20	NA	NA	NA	NA	NA	NA	NA	NA	NA	NA	NA	NA	NA	NA	NA	NA	NA	NA	NA	NA	NA	NA	NA	NA	NA	NA	NA	NA	NA	NA	NA	NA	NA	NA	NA	NA	NA	NA
R070	50151155	R070_21	female	86	non-Severe	2020-02-02	2020-03-02	2020-01-17	2020-02-06	5	21	NA	NA	NA	NA	NA	NA	NA	NA	NA	NA	NA	NA	NA	NA	NA	NA	NA	NA	NA	NA	NA	NA	NA	NA	NA	NA	NA	NA	NA	NA	NA	NA	NA	NA	NA	NA	NA	NA
R070	50151155	R070_23	female	86	non-Severe	2020-02-02	2020-03-02	2020-01-17	2020-02-08	7	23	NA	NA	NA	NA	NA	NA	NA	NA	NA	NA	NA	NA	NA	NA	NA	NA	NA	NA	positive	NA	NA	NA	NA	NA	NA	NA	NA	NA	NA	NA	NA	NA	NA	NA	NA	NA	NA	NA
R070	50151155	R070_26	female	86	non-Severe	2020-02-02	2020-03-02	2020-01-17	2020-02-11	10	26	5	Yes	No	Yes	9	NA	NA	NA	NA	NA	NA	NA	NA	NA	NA	NA	NA	NA	negative	NA	NA	NA	NA	NA	NA	NA	NA	NA	NA	NA	NA	NA	NA	NA	NA	NA	NA	NA
R070	50151155	R070_27	female	86	non-Severe	2020-02-02	2020-03-02	2020-01-17	2020-02-12	11	27	NA	NA	NA	NA	NA	NA	NA	NA	Yes	NA	NA	NA	NA	NA	NA	NA	NA	NA	NA	76	61	36.2	5.04	216	NA	NA	NA	NA	NA	NA	NA	NA	NA	NA	NA	NA	NA	NA
R070	50151155	R070_28	female	86	non-Severe	2020-02-02	2020-03-02	2020-01-17	2020-02-13	12	28	NA	NA	NA	NA	NA	NA	NA	NA	NA	NA	NA	NA	NA	NA	NA	NA	NA	NA	negative	NA	NA	NA	NA	NA	NA	NA	NA	NA	NA	NA	NA	NA	NA	NA	NA	NA	NA	NA
R070	50151155	R070_30	female	86	non-Severe	2020-02-02	2020-03-02	2020-01-17	2020-02-15	14	30	NA	NA	NA	NA	NA	NA	NA	NA	NA	NA	NA	NA	NA	NA	NA	NA	NA	NA	negative	NA	NA	NA	NA	NA	NA	NA	NA	NA	NA	NA	NA	NA	NA	NA	NA	NA	NA	NA
R070	50151155	R070_31	female	86	non-Severe	2020-02-02	2020-03-02	2020-01-17	2020-02-16	15	31	NA	NA	NA	NA	NA	NA	NA	NA	NA	NA	NA	NA	NA	NA	NA	NA	NA	negative	NA	NA	NA	NA	NA	NA	NA	NA	NA	NA	NA	NA	NA	NA	NA	NA	NA	NA	NA	NA
R070	50151155	R070_34	female	86	non-Severe	2020-02-02	2020-03-02	2020-01-17	2020-02-19	18	34	NA	NA	NA	NA	NA	NA	NA	NA	NA	NA	NA	NA	NA	NA	NA	NA	NA	NA	negative	NA	NA	NA	NA	NA	NA	NA	NA	NA	NA	NA	NA	NA	NA	NA	NA	NA	NA	NA
R070	50151155	R070_35	female	86	non-Severe	2020-02-02	2020-03-02	2020-01-17	2020-02-20	19	35	NA	NA	NA	NA	NA	NA	NA	NA	Yes	NA	NA	NA	NA	NA	NA	NA	NA	NA	NA	76	61	32.6	6.06	215	NA	NA	NA	NA	NA	NA	NA	NA	NA	NA	NA	NA	NA	NA
R070	50151155	R070_36	female	86	non-Severe	2020-02-02	2020-03-02	2020-01-17	2020-02-21	20	36	NA	NA	NA	NA	NA	NA	NA	NA	NA	NA	NA	NA	NA	NA	NA	NA	NA	NA	NA	NA	NA	NA	NA	NA	NA	NA	NA	NA	NA	NA	NA	NA	NA	NA	NA	NA	NA	NA
R070	50151155	R070_38	female	86	non-Severe	2020-02-02	2020-03-02	2020-01-17	2020-02-23	22	38	NA	NA	NA	NA	NA	NA	NA	NA	NA	NA	NA	NA	NA	NA	NA	NA	negative	negative	NA	NA	NA	NA	NA	NA	NA	NA	NA	NA	NA	NA	NA	NA	NA	NA	NA	NA	NA	NA
R070	50151155	R070_40	female	86	non-Severe	2020-02-02	2020-03-02	2020-01-17	2020-02-25	24	40	NA	NA	NA	NA	NA	NA	NA	NA	NA	NA	NA	NA	NA	NA	NA	NA	negative	negative	NA	NA	NA	NA	NA	NA	NA	NA	NA	NA	NA	NA	NA	NA	NA	NA	NA	NA	NA	NA
R070	50151155	R070_41	female	86	non-Severe	2020-02-02	2020-03-02	2020-01-17	2020-02-26	25	41	NA	NA	NA	NA	NA	NA	NA	NA	NA	NA	NA	NA	NA	NA	NA	NA	negative	NA	NA	NA	NA	NA	NA	NA	NA	NA	NA	NA	NA	NA	NA	NA	NA	NA	NA	NA	NA	NA
R070	50151155	R070_43	female	86	non-Severe	2020-02-02	2020-03-02	2020-01-17	2020-02-28	27	43	1	No	No	Yes	4	NA	NA	NA	Yes	NA	NA	NA	NA	NA	NA	NA	NA	NA	NA	79	59	32.8	5.84	220	NA	NA	NA	NA	NA	NA	NA	NA	NA	NA	NA	NA	NA	NA
R070	50151155	R070_45	female	86	non-Severe	2020-02-02	2020-03-02	2020-01-17	2020/3/1	29	45	NA	NA	NA	NA	NA	NA	NA	NA	Yes	NA	NA	NA	NA	NA	NA	NA	NA	NA	NA	NA	NA	NA	NA	NA	NA	NA	NA	NA	NA	NA	NA	NA	NA	NA	NA	NA	NA	NA
R070	50151155	R070_46	female	86	non-Severe	2020-02-02	2020-03-02	2020-01-17	2020-03-02	30	46	NA	NA	NA	NA	NA	NA	NA	NA	NA	NA	NA	NA	NA	NA	NA	NA	NA	NA	NA	NA	NA	NA	NA	NA	NA	NA	NA	NA	NA	NA	NA	NA	NA	NA	NA	NA	NA	NA
R070	50151155	R070_61	female	86	non-Severe	2020-02-02	2020-03-02	2020-01-17	2020-03-17	45	61	NA	NA	NA	NA	NA	NA	NA	NA	NA	NA	NA	NA	NA	NA	NA	NA	NA	negative	negative	74	63	NA	6.72	274	5	1.015	negative	negative	negative	negative	negative	negative	negative	negative	negative	0	0	2
R070	50151155	R070_77	female	86	non-Severe	2020-02-02	2020-03-02	2020-01-17	2020-04-02	61	77	NA	NA	NA	NA	NA	NA	NA	NA	NA	NA	NA	NA	NA	NA	NA	NA	NA	negative	NA	84	NA	43.8	5.5	203	6.5	1.015	negative	+-	negative	negative	negative	negative	+-	negative	negative	0	5	25
R070	50151155	R070_78	female	86	non-Severe	2020-02-02	2020-03-02	2020-01-17	2020-04-03	62	78	NA	NA	NA	NA	NA	NA	NA	NA	NA	NA	NA	NA	NA	NA	NA	NA	NA	negative	NA	NA	NA	NA	NA	NA	NA	NA	NA	NA	NA	NA	NA	NA	NA	NA	NA	NA	NA	NA
R071	50151156	R071_12	male	57	non-Severe	2020-02-02	2020-02-19	2020-01-31	2020-02-11	10	12	NA	NA	NA	NA	NA	NA	NA	NA	NA	NA	NA	NA	NA	NA	NA	NA	NA	NA	positive	NA	NA	NA	NA	NA	NA	NA	NA	NA	NA	NA	NA	NA	NA	NA	NA	NA	NA	NA
R071	50151156	R071_15	male	57	non-Severe	2020-02-02	2020-02-19	2020-01-31	2020-02-14	13	15	1	Yes	No	No	2	NA	NA	NA	NA	NA	NA	NA	NA	NA	NA	NA	NA	NA	NA	77	96	NA	2.51	268	NA	NA	NA	NA	NA	NA	NA	NA	NA	NA	NA	NA	NA	NA
R071	50151156	R071_17	male	57	non-Severe	2020-02-02	2020-02-19	2020-01-31	2020-02-16	15	17	NA	NA	NA	NA	NA	NA	NA	NA	NA	NA	NA	NA	NA	NA	NA	NA	NA	NA	negative	NA	NA	NA	NA	NA	NA	NA	NA	NA	NA	NA	NA	NA	NA	NA	NA	NA	NA	NA
R071	50151156	R071_18	male	57	non-Severe	2020-02-02	2020-02-19	2020-01-31	2020-02-17	16	18	NA	NA	NA	NA	NA	NA	NA	NA	NA	NA	NA	NA	NA	NA	NA	NA	NA	negative	negative	77	96	36.6	2.89	223	NA	NA	NA	NA	NA	NA	NA	NA	NA	NA	NA	NA	NA	NA
R071	50151156	R071_19	male	57	non-Severe	2020-02-02	2020-02-19	2020-01-31	2020-02-18	17	19	NA	NA	NA	NA	NA	NA	NA	NA	NA	NA	NA	NA	NA	NA	NA	NA	NA	negative	NA	NA	NA	NA	NA	NA	NA	NA	NA	NA	NA	NA	NA	NA	NA	NA	NA	NA	NA	NA
R071	50151156	R071_3	male	57	non-Severe	2020-02-02	2020-02-19	2020-01-31	2020-02-02	1	3	NA	NA	NA	NA	NA	NA	NA	NA	NA	NA	NA	NA	NA	NA	NA	NA	NA	negative	NA	70	100	44.8	4.08	252	5.5	1.015	negative	+-	negative	negative	negative	negative	negative	negative	negative	0	1	5
R071	50151156	R071_4	male	57	non-Severe	2020-02-02	2020-02-19	2020-01-31	2020/2/3	2	4	NA	NA	NA	NA	NA	NA	NA	NA	NA	Yes	NA	Yes	NA	Yes	Yes	NA	NA	NA	NA	NA	NA	NA	NA	NA	NA	NA	NA	NA	NA	NA	NA	NA	NA	NA	NA	NA	NA	NA
R072	50151161	R072_10	female	40	non-Severe	2020-02-02	2020-02-11	2020-01-29	2020-02-07	6	10	NA	NA	NA	NA	NA	NA	NA	NA	NA	NA	NA	NA	NA	NA	NA	NA	NA	NA	negative	NA	NA	NA	NA	NA	NA	NA	NA	NA	NA	NA	NA	NA	NA	NA	NA	NA	NA	NA
R072	50151161	R072_11	female	40	non-Severe	2020-02-02	2020-02-11	2020-01-29	2020-02-08	7	11	NA	NA	NA	NA	NA	NA	NA	NA	NA	NA	NA	NA	NA	NA	NA	NA	NA	NA	NA	62	109	NA	2.76	221	NA	NA	NA	NA	NA	NA	NA	NA	NA	NA	NA	NA	NA	NA
R072	50151161	R072_12	female	40	non-Severe	2020-02-02	2020-02-11	2020-01-29	2020-02-09	8	12	NA	NA	NA	NA	NA	NA	NA	NA	NA	NA	NA	NA	NA	NA	NA	NA	NA	NA	negative	NA	NA	NA	NA	NA	NA	NA	NA	NA	NA	NA	NA	NA	NA	NA	NA	NA	NA	NA
R072	50151161	R072_13	female	40	non-Severe	2020-02-02	2020-02-11	2020-01-29	2020-02-10	9	13	2	Yes	Yes	Yes	8	NA	NA	NA	NA	NA	NA	NA	NA	NA	NA	NA	NA	NA	NA	62	109	24.4	3.44	221	NA	NA	NA	NA	NA	NA	NA	NA	NA	NA	NA	NA	NA	NA
R072	50151161	R072_14	female	40	non-Severe	2020-02-02	2020-02-11	2020-01-29	2020-02-11	10	14	NA	NA	NA	NA	NA	NA	NA	NA	NA	NA	NA	NA	NA	NA	NA	NA	NA	NA	NA	NA	NA	NA	NA	NA	NA	NA	NA	NA	NA	NA	NA	NA	NA	NA	NA	NA	NA	NA
R072	50151161	R072_19	female	40	non-Severe	2020-02-02	2020-02-11	2020-01-29	2020-02-16	15	19	NA	NA	NA	NA	NA	NA	NA	NA	NA	NA	NA	NA	NA	NA	NA	NA	NA	negative	NA	NA	NA	NA	NA	NA	NA	NA	NA	NA	NA	NA	NA	NA	NA	NA	NA	NA	NA	NA
R072	50151161	R072_28	female	40	non-Severe	2020-02-02	2020-02-11	2020-01-29	2020-02-25	24	28	NA	NA	NA	NA	NA	NA	NA	NA	NA	NA	NA	NA	NA	NA	NA	NA	negative	negative	NA	59	110	NA	1.99	229	7	1.02	negative	+-	negative	negative	negative	negative	negative	negative	negative	NA	1	5
R072	50151161	R072_5	female	40	non-Severe	2020-02-02	2020-02-11	2020-01-29	2020-02-02	1	5	NA	NA	NA	NA	NA	NA	NA	NA	NA	NA	NA	NA	NA	NA	NA	NA	NA	NA	negative	NA	NA	NA	NA	NA	6	1.025	negative	negative	+-	negative	negative	negative	+-	negative	negative	0	6	32
R072	50151161	R072_52	female	40	non-Severe	2020-02-02	2020-02-11	2020-01-29	2020-03-20	48	52	NA	NA	NA	NA	NA	NA	NA	NA	NA	NA	NA	NA	NA	NA	NA	NA	negative	NA	NA	65	102	NA	3.01	269	7	1.015	negative	negative	negative	negative	negative	negative	negative	negative	negative	0	1	3
R072	50151161	R072_55	female	40	non-Severe	2020-02-02	2020-02-11	2020-01-29	2020-03-23	51	55	NA	NA	NA	NA	NA	NA	NA	NA	NA	NA	NA	NA	NA	NA	NA	NA	negative	NA	NA	NA	NA	NA	NA	NA	NA	NA	NA	NA	NA	NA	NA	NA	NA	NA	NA	NA	NA	NA
R072	50151161	R072_6	female	40	non-Severe	2020-02-02	2020-02-11	2020-01-29	2020-02-03	2	6	NA	NA	NA	NA	NA	NA	NA	NA	NA	NA	NA	NA	NA	NA	NA	NA	NA	NA	NA	77	83	21.3	3.19	240	NA	NA	NA	NA	NA	NA	NA	NA	NA	NA	NA	NA	NA	NA
R072	50151161	R072_744	female	40	non-Severe	2020-02-02	2020-02-11	2020-01-29	2022-02-10	740	744	1	Yes	No	Yes	5	NA	NA	NA	NA	NA	NA	NA	NA	NA	NA	NA	NA	NA	NA	53	112	36.9	4.54	253	6	1.017	negative	+-	negative	negative	negative	1+	negative	negative	negative	0	3	17
R073	50151166	R073_110	male	44	non-Severe	2020-02-02	2020-02-22	2020-01-29	2020-05-17	106	110	NA	NA	NA	NA	NA	NA	NA	NA	NA	NA	NA	NA	NA	NA	NA	NA	NA	NA	negative	NA	NA	NA	NA	NA	NA	NA	NA	NA	NA	NA	NA	NA	NA	NA	NA	NA	NA	NA
R073	50151166	R073_12	male	44	non-Severe	2020-02-02	2020-02-22	2020-01-29	2020-02-09	8	12	NA	NA	NA	NA	NA	NA	NA	NA	NA	NA	NA	NA	NA	NA	NA	NA	NA	NA	positive	NA	NA	NA	NA	NA	NA	NA	NA	NA	NA	NA	NA	NA	NA	NA	NA	NA	NA	NA
R073	50151166	R073_18	male	44	non-Severe	2020-02-02	2020-02-22	2020-01-29	2020-02-15	14	18	NA	NA	NA	NA	NA	NA	NA	NA	NA	NA	NA	NA	NA	NA	NA	NA	NA	NA	negative	NA	NA	NA	NA	NA	NA	NA	NA	NA	NA	NA	NA	NA	NA	NA	NA	NA	NA	NA
R073	50151166	R073_19	male	44	non-Severe	2020-02-02	2020-02-22	2020-01-29	2020-02-16	15	19	1	No	No	Yes	4	NA	NA	NA	NA	NA	NA	NA	NA	NA	NA	NA	NA	NA	negative	81	101	6.6	3.93	327	NA	NA	NA	NA	NA	NA	NA	NA	NA	NA	NA	NA	NA	NA
R073	50151166	R073_22	male	44	non-Severe	2020-02-02	2020-02-22	2020-01-29	2020-02-19	18	22	NA	NA	NA	NA	NA	NA	NA	NA	NA	NA	NA	NA	NA	NA	NA	NA	NA	negative	NA	NA	NA	NA	NA	NA	NA	NA	NA	NA	NA	NA	NA	NA	NA	NA	NA	NA	NA	NA
R073	50151166	R073_24	male	44	non-Severe	2020-02-02	2020-02-22	2020-01-29	2020-02-21	20	24	NA	NA	NA	NA	NA	NA	NA	NA	NA	NA	NA	NA	NA	NA	NA	NA	NA	NA	NA	NA	NA	NA	NA	NA	NA	NA	NA	NA	NA	NA	NA	NA	NA	NA	NA	NA	NA	NA
R073	50151166	R073_34	male	44	non-Severe	2020-02-02	2020-02-22	2020-01-29	2020-03-02	30	34	NA	NA	NA	NA	NA	NA	NA	NA	NA	NA	NA	NA	NA	NA	NA	NA	negative	negative	NA	NA	NA	NA	NA	NA	NA	NA	NA	NA	NA	NA	NA	NA	NA	NA	NA	NA	NA	NA
R073	50151166	R073_39	male	44	non-Severe	2020-02-02	2020-02-22	2020-01-29	2020-03-07	35	39	NA	NA	NA	NA	NA	NA	NA	NA	NA	NA	NA	NA	NA	NA	NA	NA	negative	negative	NA	77	105	42	3.44	336	7	1.02	negative	negative	negative	negative	negative	negative	negative	negative	negative	0	1	4
R073	50151166	R073_5	male	44	non-Severe	2020-02-02	2020-02-22	2020-01-29	2020-02-02	1	5	NA	NA	NA	NA	NA	NA	NA	NA	NA	NA	NA	NA	NA	NA	NA	NA	positive	NA	positive	70	109	35.6	4.74	305	5.5	1.02	negative	negative	negative	negative	negative	negative	negative	negative	negative	0	3	18
R073	50151166	R073_55	male	44	non-Severe	2020-02-02	2020-02-22	2020-01-29	2020-03-23	51	55	NA	NA	NA	NA	NA	NA	NA	NA	NA	NA	NA	NA	NA	NA	NA	NA	negative	negative	NA	NA	NA	NA	NA	NA	NA	NA	NA	NA	NA	NA	NA	NA	NA	NA	NA	NA	NA	NA
R073	50151166	R073_6	male	44	non-Severe	2020-02-02	2020-02-22	2020-01-29	2020/2/3	2	6	NA	NA	NA	NA	NA	Yes	NA	Yes	NA	NA	Yes	NA	NA	NA	NA	NA	NA	NA	NA	NA	NA	NA	NA	NA	NA	NA	NA	NA	NA	NA	NA	NA	NA	NA	NA	NA	NA	NA
R074	50151167	R074_10	male	36	non-Severe	2020-02-02	2020-02-12	2020-01-31	2020-02-09	8	10	NA	NA	NA	NA	NA	NA	NA	NA	NA	NA	NA	NA	NA	NA	NA	NA	NA	NA	negative	NA	NA	NA	NA	NA	NA	NA	NA	NA	NA	NA	NA	NA	NA	NA	NA	NA	NA	NA
R074	50151167	R074_11	male	36	non-Severe	2020-02-02	2020-02-12	2020-01-31	2020-02-10	9	11	0	No	No	No	0	NA	NA	NA	NA	NA	NA	NA	NA	NA	NA	NA	NA	NA	negative	NA	NA	NA	NA	NA	NA	NA	NA	NA	NA	NA	NA	NA	NA	NA	NA	NA	NA	NA
R074	50151167	R074_12	male	36	non-Severe	2020-02-02	2020-02-12	2020-01-31	2020-02-11	10	12	NA	NA	NA	NA	NA	NA	NA	NA	NA	NA	NA	NA	NA	NA	NA	NA	NA	negative	NA	105	78	36	4.04	336	NA	NA	NA	NA	NA	NA	NA	NA	NA	NA	NA	NA	NA	NA
R074	50151167	R074_13	male	36	non-Severe	2020-02-02	2020-02-12	2020-01-31	2020/2/12	11	13	NA	NA	NA	NA	NA	Yes	NA	Yes	NA	NA	NA	NA	NA	NA	NA	NA	NA	NA	NA	NA	NA	NA	NA	NA	NA	NA	NA	NA	NA	NA	NA	NA	NA	NA	NA	NA	NA	NA
R074	50151167	R074_21	male	36	non-Severe	2020-02-02	2020-02-12	2020-01-31	2020-02-20	19	21	NA	NA	NA	NA	NA	NA	NA	NA	NA	NA	NA	NA	NA	NA	NA	NA	negative	NA	NA	NA	NA	NA	NA	NA	NA	NA	NA	NA	NA	NA	NA	NA	NA	NA	NA	NA	NA	NA
R074	50151167	R074_27	male	36	non-Severe	2020-02-02	2020-02-12	2020-01-31	2020-02-26	25	27	NA	NA	NA	NA	NA	NA	NA	NA	NA	NA	NA	NA	NA	NA	NA	NA	negative	negative	NA	80	109	NA	5.73	354	6	1.025	negative	negative	negative	negative	negative	negative	negative	negative	negative	NA	2	10
R074	50151167	R074_28	male	36	non-Severe	2020-02-02	2020-02-12	2020-01-31	2020-02-27	26	28	NA	NA	NA	NA	NA	NA	NA	NA	NA	NA	NA	NA	NA	NA	NA	NA	NA	NA	NA	NA	NA	NA	NA	NA	NA	NA	NA	NA	NA	NA	NA	NA	NA	NA	NA	NA	NA	NA
R074	50151167	R074_3	male	36	non-Severe	2020-02-02	2020-02-12	2020-01-31	2020-02-02	1	3	NA	NA	NA	NA	NA	NA	NA	NA	NA	NA	NA	NA	NA	NA	NA	NA	negative	NA	positive	94	89	39.4	5.07	357	5.5	1.03	negative	negative	negative	negative	negative	negative	+-	negative	negative	0	4	20
R074	50151167	R074_4	male	36	non-Severe	2020-02-02	2020-02-12	2020-01-31	2020/2/3	2	4	NA	NA	NA	NA	NA	NA	NA	NA	NA	NA	Yes	NA	NA	NA	NA	NA	NA	NA	NA	NA	NA	NA	NA	NA	NA	NA	NA	NA	NA	NA	NA	NA	NA	NA	NA	NA	NA	NA
R074	50151167	R074_41	male	36	non-Severe	2020-02-02	2020-02-12	2020-01-31	2020-03-11	39	41	NA	NA	NA	NA	NA	NA	NA	NA	NA	NA	NA	NA	NA	NA	NA	NA	negative	negative	NA	NA	NA	NA	NA	NA	NA	NA	NA	NA	NA	NA	NA	NA	NA	NA	NA	NA	NA	NA
R074	50151167	R074_6	male	36	non-Severe	2020-02-02	2020-02-12	2020-01-31	2020-02-05	4	6	NA	NA	NA	NA	NA	NA	NA	NA	NA	NA	NA	NA	NA	NA	Yes	NA	NA	NA	NA	NA	NA	NA	NA	NA	NA	NA	NA	NA	NA	NA	NA	NA	NA	NA	NA	NA	NA	NA
R075	50151188	R075_15	female	51	non-Severe	2020-02-03	2020-03-07	2020-01-29	2020-02-12	10	15	NA	NA	NA	NA	NA	NA	NA	NA	NA	NA	NA	NA	NA	NA	NA	NA	NA	NA	negative	NA	NA	NA	NA	NA	NA	NA	NA	NA	NA	NA	NA	NA	NA	NA	NA	NA	NA	NA
R075	50151188	R075_16	female	51	non-Severe	2020-02-03	2020-03-07	2020-01-29	2020-02-13	11	16	4	Yes	Yes	No	7	NA	NA	NA	NA	NA	NA	NA	NA	NA	NA	NA	NA	NA	negative	NA	NA	NA	NA	NA	NA	NA	NA	NA	NA	NA	NA	NA	NA	NA	NA	NA	NA	NA
R075	50151188	R075_160	female	51	non-Severe	2020-02-03	2020-03-07	2020-01-29	2020-07-06	155	160	NA	NA	NA	NA	NA	NA	NA	NA	NA	NA	NA	NA	NA	NA	NA	NA	negative	NA	NA	NA	NA	NA	NA	NA	NA	NA	NA	NA	NA	NA	NA	NA	NA	NA	NA	NA	NA	NA
R075	50151188	R075_17	female	51	non-Severe	2020-02-03	2020-03-07	2020-01-29	2020-02-14	12	17	NA	NA	NA	NA	NA	NA	NA	NA	NA	NA	NA	NA	NA	NA	NA	NA	NA	NA	NA	48	109	NA	4.16	171	NA	NA	NA	NA	NA	NA	NA	NA	NA	NA	NA	NA	NA	NA
R075	50151188	R075_19	female	51	non-Severe	2020-02-03	2020-03-07	2020-01-29	2020-02-16	14	19	NA	NA	NA	NA	NA	NA	NA	NA	NA	NA	NA	NA	NA	NA	NA	NA	NA	negative	NA	NA	NA	NA	NA	NA	NA	NA	NA	NA	NA	NA	NA	NA	NA	NA	NA	NA	NA	NA
R075	50151188	R075_22	female	51	non-Severe	2020-02-03	2020-03-07	2020-01-29	2020-02-19	17	22	NA	NA	NA	NA	NA	NA	NA	NA	NA	NA	NA	NA	NA	NA	NA	negative	negative	NA	NA	NA	NA	NA	NA	NA	NA	NA	NA	NA	NA	NA	NA	NA	NA	NA	NA	NA	NA	NA
R075	50151188	R075_24	female	51	non-Severe	2020-02-03	2020-03-07	2020-01-29	2020-02-21	19	24	NA	NA	NA	NA	NA	NA	NA	NA	NA	NA	NA	NA	NA	NA	NA	NA	NA	NA	NA	52	107	30.2	3.73	229	NA	NA	NA	NA	NA	NA	NA	NA	NA	NA	NA	NA	NA	NA
R075	50151188	R075_25	female	51	non-Severe	2020-02-03	2020-03-07	2020-01-29	2020-02-22	20	25	NA	NA	NA	NA	NA	NA	NA	NA	NA	NA	NA	NA	NA	NA	NA	NA	NA	NA	NA	57	103	NA	4.7	251	NA	NA	NA	NA	NA	NA	NA	NA	NA	NA	NA	NA	NA	NA
R075	50151188	R075_27	female	51	non-Severe	2020-02-03	2020-03-07	2020-01-29	2020-02-24	22	27	NA	NA	NA	NA	NA	NA	NA	NA	NA	NA	NA	NA	NA	NA	NA	NA	negative	NA	NA	NA	NA	NA	NA	NA	NA	NA	NA	NA	NA	NA	NA	NA	NA	NA	NA	NA	NA	NA
R075	50151188	R075_28	female	51	non-Severe	2020-02-03	2020-03-07	2020-01-29	2020-02-25	23	28	NA	NA	NA	NA	NA	NA	NA	NA	NA	NA	NA	NA	NA	NA	NA	NA	NA	negative	NA	NA	NA	NA	NA	NA	NA	NA	NA	NA	NA	NA	NA	NA	NA	NA	NA	NA	NA	NA
R075	50151188	R075_29	female	51	non-Severe	2020-02-03	2020-03-07	2020-01-29	2020-02-26	24	29	NA	NA	NA	NA	NA	NA	NA	NA	NA	NA	NA	NA	NA	NA	NA	NA	NA	negative	NA	50	108	27.7	3.92	218	NA	NA	NA	NA	NA	NA	NA	NA	NA	NA	NA	NA	NA	NA
R075	50151188	R075_32	female	51	non-Severe	2020-02-03	2020-03-07	2020-01-29	2020-02-29	27	32	NA	NA	NA	NA	NA	NA	NA	NA	NA	NA	NA	NA	NA	NA	NA	NA	NA	NA	NA	48	109	34.7	4.83	230	NA	NA	NA	NA	NA	NA	NA	NA	NA	NA	NA	NA	NA	NA
R075	50151188	R075_33	female	51	non-Severe	2020-02-03	2020-03-07	2020-01-29	2020-03-01	28	33	NA	NA	NA	NA	NA	NA	NA	NA	NA	NA	NA	NA	NA	NA	NA	NA	negative	negative	NA	NA	NA	NA	NA	NA	NA	NA	NA	NA	NA	NA	NA	NA	NA	NA	NA	NA	NA	NA
R075	50151188	R075_37	female	51	non-Severe	2020-02-03	2020-03-07	2020-01-29	2020-03-05	32	37	4	Yes	No	No	5	NA	NA	NA	NA	NA	NA	NA	NA	NA	NA	NA	NA	NA	NA	NA	NA	NA	NA	NA	NA	NA	NA	NA	NA	NA	NA	NA	NA	NA	NA	NA	NA	NA
R075	50151188	R075_379	female	51	non-Severe	2020-02-03	2020-03-07	2020-01-29	2021-02-10	374	379	1	Yes	No	No	2	NA	NA	NA	NA	NA	NA	NA	Yes	NA	NA	NA	negative	NA	NA	42	114	41.2	4.99	274	6	1.03	NA	+-	NA	3+	negative	negative	negative	negative	negative	NA	NA	0
R075	50151188	R075_38	female	51	non-Severe	2020-02-03	2020-03-07	2020-01-29	2020-03-06	33	38	NA	NA	NA	NA	NA	NA	NA	NA	NA	NA	NA	NA	NA	NA	NA	NA	NA	NA	NA	NA	NA	NA	NA	NA	NA	NA	NA	NA	NA	NA	NA	NA	NA	NA	NA	NA	NA	NA
R075	50151188	R075_53	female	51	non-Severe	2020-02-03	2020-03-07	2020-01-29	2020-03-21	48	53	NA	NA	NA	NA	NA	NA	NA	NA	NA	NA	NA	NA	NA	NA	NA	NA	negative	negative	NA	NA	NA	NA	NA	NA	NA	NA	NA	NA	NA	NA	NA	NA	NA	NA	NA	NA	NA	NA
R075	50151188	R075_6	female	51	non-Severe	2020-02-03	2020-03-07	2020-01-29	2020-02-03	1	6	NA	NA	NA	NA	NA	NA	NA	NA	NA	NA	NA	NA	NA	NA	NA	NA	NA	positive	NA	60	102	30.2	2.84	212	6	1.01	negative	negative	negative	negative	negative	negative	negative	negative	negative	0	0	2
R075	50151188	R075_67	female	51	non-Severe	2020-02-03	2020-03-07	2020-01-29	2020-04-04	62	67	NA	NA	NA	NA	NA	NA	NA	NA	NA	NA	NA	NA	NA	NA	NA	NA	negative	negative	NA	NA	NA	NA	NA	NA	NA	NA	NA	NA	NA	NA	NA	NA	NA	NA	NA	NA	NA	NA
R075	50151188	R075_7	female	51	non-Severe	2020-02-03	2020-03-07	2020-01-29	2020-02-04	2	7	NA	NA	NA	NA	NA	NA	NA	Yes	NA	Yes	NA	Yes	Yes	Yes	Yes	NA	NA	NA	NA	NA	NA	NA	NA	NA	NA	NA	NA	NA	NA	NA	NA	NA	NA	NA	NA	NA	NA	NA
R075	50151188	R075_744	female	51	non-Severe	2020-02-03	2020-03-07	2020-01-29	2022-02-10	739	744	1	Yes	No	No	2	NA	NA	NA	NA	NA	NA	NA	NA	NA	NA	NA	NA	NA	NA	43	111	46	3.86	255	6	1.014	negative	negative	negative	negative	negative	negative	negative	negative	negative	0	1	4
R076	50151199	R076_10	male	44	non-Severe	2020-02-03	2020-03-04	2020-01-26	2020/2/4	2	10	NA	NA	NA	NA	NA	NA	NA	Yes	NA	Yes	NA	Yes	Yes	Yes	Yes	NA	NA	NA	NA	NA	NA	NA	NA	NA	NA	NA	NA	NA	NA	NA	NA	NA	NA	NA	NA	NA	NA	NA
R076	50151199	R076_17	male	44	non-Severe	2020-02-03	2020-03-04	2020-01-26	2020-02-11	9	17	NA	NA	NA	NA	NA	NA	NA	NA	NA	NA	NA	NA	NA	NA	NA	NA	NA	NA	positive	NA	NA	NA	NA	NA	NA	NA	NA	NA	NA	NA	NA	NA	NA	NA	NA	NA	NA	NA
R076	50151199	R076_20	male	44	non-Severe	2020-02-03	2020-03-04	2020-01-26	2020-02-14	12	20	NA	NA	NA	NA	NA	NA	NA	NA	NA	NA	NA	NA	NA	NA	NA	NA	NA	NA	NA	85	96	NA	4.68	342	NA	NA	NA	NA	NA	NA	NA	NA	NA	NA	NA	NA	NA	NA
R076	50151199	R076_21	male	44	non-Severe	2020-02-03	2020-03-04	2020-01-26	2020/2/15	13	21	5	Yes	No	Yes	9	NA	NA	NA	NA	NA	NA	NA	NA	NA	NA	NA	NA	NA	positive	NA	NA	NA	NA	NA	NA	NA	NA	NA	NA	NA	NA	NA	NA	NA	NA	NA	NA	NA
R076	50151199	R076_226	male	44	non-Severe	2020-02-03	2020-03-04	2020-01-26	2020-09-07	218	226	NA	NA	NA	NA	NA	NA	NA	NA	NA	NA	NA	NA	NA	NA	NA	NA	NA	NA	negative	NA	NA	NA	NA	NA	NA	NA	NA	NA	NA	NA	NA	NA	NA	NA	NA	NA	NA	NA
R076	50151199	R076_24	male	44	non-Severe	2020-02-03	2020-03-04	2020-01-26	2020-02-18	16	24	NA	NA	NA	NA	NA	NA	NA	NA	NA	NA	NA	NA	NA	NA	NA	NA	NA	NA	negative	NA	NA	NA	NA	NA	NA	NA	NA	NA	NA	NA	NA	NA	NA	NA	NA	NA	NA	NA
R076	50151199	R076_29	male	44	non-Severe	2020-02-03	2020-03-04	2020-01-26	2020-02-23	21	29	NA	NA	NA	NA	NA	NA	NA	NA	NA	NA	NA	NA	NA	NA	NA	NA	negative	NA	NA	NA	NA	NA	NA	NA	NA	NA	NA	NA	NA	NA	NA	NA	NA	NA	NA	NA	NA	NA
R076	50151199	R076_30	male	44	non-Severe	2020-02-03	2020-03-04	2020-01-26	2020-02-24	22	30	NA	NA	NA	NA	NA	NA	NA	NA	NA	NA	NA	NA	NA	NA	NA	NA	negative	positive	negative	80	103	NA	2.67	319	NA	NA	NA	NA	NA	NA	NA	NA	NA	NA	NA	NA	NA	NA
R076	50151199	R076_31	male	44	non-Severe	2020-02-03	2020-03-04	2020-01-26	2020-02-25	23	31	NA	NA	NA	NA	NA	NA	NA	NA	NA	NA	NA	NA	NA	NA	NA	NA	negative	NA	NA	NA	NA	NA	NA	NA	NA	NA	NA	NA	NA	NA	NA	NA	NA	NA	NA	NA	NA	NA
R076	50151199	R076_32	male	44	non-Severe	2020-02-03	2020-03-04	2020-01-26	2020-02-26	24	32	NA	NA	NA	NA	NA	NA	NA	NA	NA	NA	NA	NA	NA	NA	NA	NA	NA	positive	NA	NA	NA	NA	NA	NA	NA	NA	NA	NA	NA	NA	NA	NA	NA	NA	NA	NA	NA	NA
R076	50151199	R076_35	male	44	non-Severe	2020-02-03	2020-03-04	2020-01-26	2020-02-29	27	35	NA	NA	NA	NA	NA	NA	NA	NA	NA	NA	NA	NA	NA	NA	NA	NA	NA	negative	NA	NA	NA	NA	NA	NA	NA	NA	NA	NA	NA	NA	NA	NA	NA	NA	NA	NA	NA	NA
R076	50151199	R076_36	male	44	non-Severe	2020-02-03	2020-03-04	2020-01-26	2020-03-01	28	36	NA	NA	NA	NA	NA	NA	NA	NA	NA	NA	NA	NA	NA	NA	NA	NA	NA	negative	NA	NA	NA	NA	NA	NA	NA	NA	NA	NA	NA	NA	NA	NA	NA	NA	NA	NA	NA	NA
R076	50151199	R076_37	male	44	non-Severe	2020-02-03	2020-03-04	2020-01-26	2020-03-02	29	37	NA	NA	NA	NA	NA	NA	NA	NA	NA	NA	NA	NA	NA	NA	NA	NA	negative	NA	NA	NA	NA	NA	NA	NA	NA	NA	NA	NA	NA	NA	NA	NA	NA	NA	NA	NA	NA	NA
R076	50151199	R076_38	male	44	non-Severe	2020-02-03	2020-03-04	2020-01-26	2020-03-03	30	38	4	Yes	No	Yes	8	NA	NA	NA	NA	NA	NA	NA	NA	NA	NA	NA	NA	NA	NA	83	98	NA	3.41	311	NA	NA	NA	NA	NA	NA	NA	NA	NA	NA	NA	NA	NA	NA
R076	50151199	R076_381	male	44	non-Severe	2020-02-03	2020-03-04	2020-01-26	2021-02-09	373	381	0	No	No	No	0	NA	NA	NA	NA	NA	NA	NA	Yes	NA	NA	NA	negative	NA	NA	57	118	51.9	5.77	289	5	1.009	NA	negative	NA	negative	negative	negative	negative	negative	negative	NA	NA	0
R076	50151199	R076_53	male	44	non-Severe	2020-02-03	2020-03-04	2020-01-26	2020-03-18	45	53	NA	NA	NA	NA	NA	NA	NA	NA	NA	NA	NA	NA	NA	NA	NA	NA	negative	negative	NA	80	103	NA	3.32	359	5	1.02	negative	negative	negative	negative	negative	negative	negative	negative	negative	0	1	5
R076	50151199	R076_67	male	44	non-Severe	2020-02-03	2020-03-04	2020-01-26	2020-04-01	59	67	NA	NA	NA	NA	NA	NA	NA	NA	NA	NA	NA	NA	NA	NA	NA	NA	negative	negative	NA	NA	NA	NA	NA	NA	NA	NA	NA	NA	NA	NA	NA	NA	NA	NA	NA	NA	NA	NA
R076	50151199	R076_747	male	44	non-Severe	2020-02-03	2020-03-04	2020-01-26	2022-02-10	739	747	NA	NA	NA	NA	NA	NA	NA	NA	NA	NA	NA	NA	NA	NA	NA	NA	NA	NA	NA	83	96	49.1	5.04	399	5.5	1.018	negative	negative	negative	negative	negative	negative	negative	negative	negative	0	0	1
R076	50151199	R076_9	male	44	non-Severe	2020-02-03	2020-03-04	2020-01-26	2020-02-03	1	9	NA	NA	NA	NA	NA	NA	NA	NA	NA	NA	NA	NA	NA	NA	NA	NA	NA	positive	NA	75	106	24.3	3.18	284	5.5	1.025	negative	+-	negative	+-	negative	negative	negative	negative	negative	0	4	22
R077	50151200	R077_12	male	66	non-Severe	2020-02-03	2020-02-21	2020-01-31	2020-02-11	9	12	NA	NA	NA	NA	NA	NA	NA	NA	NA	NA	NA	NA	NA	NA	NA	NA	NA	NA	NA	63	98	NA	2.71	191	NA	NA	NA	NA	NA	NA	NA	NA	NA	NA	NA	NA	NA	NA
R077	50151200	R077_123	male	66	non-Severe	2020-02-03	2020-02-21	2020-01-31	2020-06-01	120	123	NA	NA	NA	NA	NA	NA	NA	NA	NA	NA	NA	NA	NA	NA	NA	NA	NA	NA	NA	62	98	NA	4.68	304	6	1.02	negative	negative	+-	negative	negative	negative	negative	negative	negative	0	1	4
R077	50151200	R077_14	male	66	non-Severe	2020-02-03	2020-02-21	2020-01-31	2020-02-13	11	14	NA	NA	NA	NA	NA	NA	NA	NA	NA	NA	NA	NA	NA	NA	NA	NA	NA	NA	negative	NA	NA	NA	NA	NA	NA	NA	NA	NA	NA	NA	NA	NA	NA	NA	NA	NA	NA	NA
R077	50151200	R077_15	male	66	non-Severe	2020-02-03	2020-02-21	2020-01-31	2020-02-14	12	15	5	Yes	No	No	6	NA	NA	NA	NA	NA	NA	NA	NA	NA	NA	NA	NA	NA	negative	NA	NA	NA	NA	NA	NA	NA	NA	NA	NA	NA	NA	NA	NA	NA	NA	NA	NA	NA
R077	50151200	R077_17	male	66	non-Severe	2020-02-03	2020-02-21	2020-01-31	2020-02-16	14	17	NA	NA	NA	NA	NA	NA	NA	NA	NA	NA	NA	NA	NA	NA	NA	NA	NA	negative	NA	NA	NA	NA	NA	NA	NA	NA	NA	NA	NA	NA	NA	NA	NA	NA	NA	NA	NA	NA
R077	50151200	R077_20	male	66	non-Severe	2020-02-03	2020-02-21	2020-01-31	2020/2/19	17	20	5	Yes	No	Yes	9	NA	NA	NA	NA	NA	NA	NA	NA	NA	NA	NA	negative	NA	NA	NA	NA	NA	NA	NA	NA	NA	NA	NA	NA	NA	NA	NA	NA	NA	NA	NA	NA	NA
R077	50151200	R077_21	male	66	non-Severe	2020-02-03	2020-02-21	2020-01-31	2020-02-20	18	21	NA	NA	NA	NA	NA	NA	NA	NA	NA	NA	NA	NA	NA	NA	NA	NA	NA	negative	NA	NA	NA	NA	NA	NA	NA	NA	NA	NA	NA	NA	NA	NA	NA	NA	NA	NA	NA	NA
R077	50151200	R077_36	male	66	non-Severe	2020-02-03	2020-02-21	2020-01-31	2020-03-06	33	36	NA	NA	NA	NA	NA	NA	NA	NA	NA	NA	NA	NA	NA	NA	NA	NA	negative	negative	NA	70	93	NA	3.28	252	7.5	1.015	negative	negative	negative	+-	negative	negative	negative	negative	negative	0	0	1
R077	50151200	R077_4	male	66	non-Severe	2020-02-03	2020-02-21	2020-01-31	2020-02-03	1	4	NA	NA	NA	NA	NA	NA	NA	NA	NA	NA	NA	NA	NA	NA	NA	NA	NA	positive	NA	74	91	18.4	3.89	234	6	1.02	negative	negative	2+	4+	negative	negative	negative	negative	negative	0	3	15
R077	50151200	R077_5	male	66	non-Severe	2020-02-03	2020-02-21	2020-01-31	2020-02-04	2	5	NA	NA	NA	NA	NA	NA	NA	Yes	NA	Yes	NA	Yes	NA	Yes	Yes	NA	NA	NA	NA	NA	NA	NA	NA	NA	NA	NA	NA	NA	NA	NA	NA	NA	NA	NA	NA	NA	NA	NA
R077	50151200	R077_50	male	66	non-Severe	2020-02-03	2020-02-21	2020-01-31	2020-03-20	47	50	NA	NA	NA	NA	NA	NA	NA	NA	NA	NA	NA	NA	NA	NA	NA	NA	negative	negative	NA	67	95	NA	4.28	255	NA	NA	NA	NA	NA	NA	NA	NA	NA	NA	NA	NA	NA	NA
R077	50151200	R077_51	male	66	non-Severe	2020-02-03	2020-02-21	2020-01-31	2020-03-21	48	51	NA	NA	NA	NA	NA	NA	NA	NA	NA	NA	NA	NA	NA	NA	NA	NA	negative	NA	NA	NA	NA	NA	NA	NA	NA	NA	NA	NA	NA	NA	NA	NA	NA	NA	NA	NA	NA	NA
R077	50151200	R077_742	male	66	non-Severe	2020-02-03	2020-02-21	2020-01-31	2022-02-10	739	742	0	No	No	No	0	NA	NA	NA	NA	NA	NA	NA	NA	NA	NA	NA	NA	NA	NA	58	99	43.7	5.21	294	5.5	1.013	negative	negative	negative	1+	negative	negative	negative	negative	negative	0	1	4
R078	50151201	R078_11	male	63	non-Severe	2020-02-03	2020-03-04	2020-01-31	2020-02-10	8	11	NA	NA	NA	NA	NA	NA	NA	Yes	Yes	NA	NA	NA	NA	NA	NA	NA	NA	NA	NA	75	92	NA	3.56	85	NA	NA	NA	NA	NA	NA	NA	NA	NA	NA	NA	NA	NA	NA
R078	50151201	R078_12	male	63	non-Severe	2020-02-03	2020-03-04	2020-01-31	2020-02-11	9	12	NA	NA	NA	NA	NA	NA	NA	NA	NA	NA	NA	NA	NA	NA	NA	NA	NA	NA	positive	NA	NA	NA	NA	NA	NA	NA	NA	NA	NA	NA	NA	NA	NA	NA	NA	NA	NA	NA
R078	50151201	R078_13	male	63	non-Severe	2020-02-03	2020-03-04	2020-01-31	2020-02-12	10	13	NA	NA	NA	NA	NA	NA	NA	NA	NA	NA	NA	NA	NA	NA	NA	NA	NA	NA	NA	NA	NA	NA	NA	NA	NA	NA	NA	NA	NA	NA	NA	NA	NA	NA	NA	NA	NA	NA
R078	50151201	R078_16	male	63	non-Severe	2020-02-03	2020-03-04	2020-01-31	2020-02-15	13	16	NA	NA	NA	NA	NA	NA	NA	Yes	Yes	NA	NA	NA	NA	NA	NA	NA	NA	NA	NA	80	90	35.1	3.29	153	NA	NA	NA	NA	NA	NA	NA	NA	NA	NA	NA	NA	NA	NA
R078	50151201	R078_17	male	63	non-Severe	2020-02-03	2020-03-04	2020-01-31	2020-02-16	14	17	NA	NA	NA	NA	NA	NA	NA	NA	NA	NA	NA	NA	NA	NA	NA	NA	NA	negative	NA	NA	NA	NA	NA	NA	NA	NA	NA	NA	NA	NA	NA	NA	NA	NA	NA	NA	NA	NA
R078	50151201	R078_18	male	63	non-Severe	2020-02-03	2020-03-04	2020-01-31	2020-02-17	15	18	NA	NA	NA	NA	NA	NA	NA	NA	NA	NA	NA	NA	NA	NA	NA	NA	NA	NA	negative	NA	NA	NA	NA	NA	NA	NA	NA	NA	NA	NA	NA	NA	NA	NA	NA	NA	NA	NA
R078	50151201	R078_20	male	63	non-Severe	2020-02-03	2020-03-04	2020-01-31	2020-02-19	17	20	NA	NA	NA	NA	NA	NA	NA	NA	NA	NA	NA	NA	NA	NA	NA	NA	NA	NA	negative	NA	NA	NA	NA	NA	NA	NA	NA	NA	NA	NA	NA	NA	NA	NA	NA	NA	NA	NA
R078	50151201	R078_21	male	63	non-Severe	2020-02-03	2020-03-04	2020-01-31	2020-02-20	18	21	4	Yes	No	Yes	8	NA	NA	NA	NA	NA	NA	NA	NA	NA	NA	NA	negative	negative	negative	NA	NA	NA	NA	NA	NA	NA	NA	NA	NA	NA	NA	NA	NA	NA	NA	NA	NA	NA
R078	50151201	R078_22	male	63	non-Severe	2020-02-03	2020-03-04	2020-01-31	2020-02-21	19	22	NA	NA	NA	NA	NA	NA	NA	NA	NA	NA	NA	NA	NA	NA	NA	NA	positive	negative	NA	NA	NA	NA	NA	NA	NA	NA	NA	NA	NA	NA	NA	NA	NA	NA	NA	NA	NA	NA
R078	50151201	R078_24	male	63	non-Severe	2020-02-03	2020-03-04	2020-01-31	2020-02-23	21	24	NA	NA	NA	NA	NA	NA	NA	Yes	Yes	NA	NA	NA	NA	NA	NA	NA	NA	NA	NA	77	91	46.5	3.77	135	NA	NA	NA	NA	NA	NA	NA	NA	NA	NA	NA	NA	NA	NA
R078	50151201	R078_25	male	63	non-Severe	2020-02-03	2020-03-04	2020-01-31	2020-02-24	22	25	NA	NA	NA	NA	NA	NA	NA	NA	NA	NA	NA	NA	NA	NA	NA	NA	positive	negative	NA	NA	NA	NA	NA	NA	NA	NA	NA	NA	NA	NA	NA	NA	NA	NA	NA	NA	NA	NA
R078	50151201	R078_27	male	63	non-Severe	2020-02-03	2020-03-04	2020-01-31	2020-02-26	24	27	NA	NA	NA	NA	NA	NA	NA	NA	NA	NA	NA	NA	NA	NA	NA	NA	positive	negative	NA	NA	NA	NA	NA	NA	NA	NA	NA	NA	NA	NA	NA	NA	NA	NA	NA	NA	NA	NA
R078	50151201	R078_30	male	63	non-Severe	2020-02-03	2020-03-04	2020-01-31	2020-02-29	27	30	NA	NA	NA	NA	NA	NA	Yes	Yes	Yes	NA	NA	NA	NA	NA	NA	NA	negative	negative	NA	77	91	41.8	3.29	155	NA	NA	NA	NA	NA	NA	NA	NA	NA	NA	NA	NA	NA	NA
R078	50151201	R078_32	male	63	non-Severe	2020-02-03	2020-03-04	2020-01-31	2020-03-02	29	32	NA	NA	NA	NA	NA	NA	NA	NA	NA	NA	NA	NA	NA	NA	NA	NA	negative	NA	NA	NA	NA	NA	NA	NA	NA	NA	NA	NA	NA	NA	NA	NA	NA	NA	NA	NA	NA	NA
R078	50151201	R078_33	male	63	non-Severe	2020-02-03	2020-03-04	2020-01-31	2020/3/3	30	33	1	Yes	No	No	2	NA	NA	NA	NA	NA	NA	NA	NA	NA	NA	NA	NA	negative	negative	NA	NA	NA	NA	NA	NA	NA	NA	NA	NA	NA	NA	NA	NA	NA	NA	NA	NA	NA
R078	50151201	R078_375	male	63	non-Severe	2020-02-03	2020-03-04	2020-01-31	2021-02-08	372	375	0	No	No	No	0	NA	Yes	NA	NA	NA	NA	NA	Yes	NA	NA	NA	NA	NA	negative	61	100	43.6	4.98	171	8	1.022	NA	negative	NA	negative	negative	negative	negative	negative	negative	NA	NA	0
R078	50151201	R078_4	male	63	non-Severe	2020-02-03	2020-03-04	2020-01-31	2020-02-03	1	4	NA	NA	NA	NA	NA	NA	Yes	Yes	Yes	NA	NA	NA	NA	NA	NA	NA	NA	negative	NA	84	85	31.1	3.9	158	6.5	1.02	negative	+-	+-	negative	negative	negative	negative	negative	negative	0	2	11
R078	50151201	R078_48	male	63	non-Severe	2020-02-03	2020-03-04	2020-01-31	2020-03-18	45	48	NA	NA	NA	NA	NA	NA	NA	NA	NA	NA	NA	NA	NA	NA	NA	NA	negative	negative	NA	75	92	NA	3.72	154	7.5	1.02	negative	negative	negative	negative	negative	negative	negative	negative	negative	0	2	10
R078	50151201	R078_5	male	63	non-Severe	2020-02-03	2020-03-04	2020-01-31	2020/2/4	2	5	NA	NA	NA	NA	NA	NA	NA	NA	NA	NA	NA	Yes	Yes	Yes	Yes	NA	NA	NA	NA	NA	NA	NA	NA	NA	NA	NA	NA	NA	NA	NA	NA	NA	NA	NA	NA	NA	NA	NA
R078	50151201	R078_6	male	63	non-Severe	2020-02-03	2020-03-04	2020-01-31	2020/2/5	3	6	NA	NA	NA	NA	NA	NA	NA	NA	NA	NA	Yes	NA	NA	NA	NA	NA	NA	NA	NA	NA	NA	NA	NA	NA	NA	NA	NA	NA	NA	NA	NA	NA	NA	NA	NA	NA	NA	NA
R078	50151201	R078_7	male	63	non-Severe	2020-02-03	2020-03-04	2020-01-31	2020/2/6	4	7	NA	NA	NA	NA	NA	Yes	NA	Yes	NA	Yes	NA	NA	NA	NA	NA	NA	NA	NA	NA	NA	NA	NA	NA	NA	NA	NA	NA	NA	NA	NA	NA	NA	NA	NA	NA	NA	NA	NA
R078	50151201	R078_741	male	63	non-Severe	2020-02-03	2020-03-04	2020-01-31	2022-02-09	738	741	0	No	No	No	0	NA	NA	NA	NA	NA	NA	NA	NA	NA	NA	NA	NA	NA	NA	74	91	37.4	5.05	172	8	1.021	negative	negative	negative	negative	negative	negative	negative	negative	negative	0	0	2
R078	50151201	R078_8	male	63	non-Severe	2020-02-03	2020-03-04	2020-01-31	2020-02-07	5	8	4	Yes	No	No	5	NA	NA	NA	NA	NA	NA	NA	NA	NA	NA	NA	NA	NA	positive	NA	NA	NA	NA	NA	NA	NA	NA	NA	NA	NA	NA	NA	NA	NA	NA	NA	NA	NA
R079	50151202	R079_13	female	35	non-Severe	2020-02-03	2020-02-23	2020-01-28	2020-02-09	7	13	NA	NA	NA	NA	NA	NA	NA	NA	NA	NA	NA	NA	NA	NA	NA	NA	NA	NA	negative	NA	NA	NA	NA	NA	NA	NA	NA	NA	NA	NA	NA	NA	NA	NA	NA	NA	NA	NA
R079	50151202	R079_14	female	35	non-Severe	2020-02-03	2020-02-23	2020-01-28	2020-02-10	8	14	1	Yes	Yes	Yes	7	NA	NA	NA	NA	NA	NA	NA	NA	NA	NA	NA	negative	negative	NA	NA	NA	NA	NA	NA	NA	NA	NA	NA	NA	NA	NA	NA	NA	NA	NA	NA	NA	NA
R079	50151202	R079_16	female	35	non-Severe	2020-02-03	2020-02-23	2020-01-28	2020-02-12	10	16	NA	NA	NA	NA	NA	NA	NA	NA	NA	NA	NA	NA	NA	NA	NA	NA	NA	NA	NA	63	110	31.1	3.75	178	NA	NA	NA	NA	NA	NA	NA	NA	NA	NA	NA	NA	NA	NA
R079	50151202	R079_18	female	35	non-Severe	2020-02-03	2020-02-23	2020-01-28	2020-02-14	12	18	NA	NA	NA	NA	NA	NA	NA	NA	NA	NA	NA	NA	NA	NA	NA	NA	NA	NA	negative	NA	NA	NA	NA	NA	NA	NA	NA	NA	NA	NA	NA	NA	NA	NA	NA	NA	NA	NA
R079	50151202	R079_20	female	35	non-Severe	2020-02-03	2020-02-23	2020-01-28	2020-02-16	14	20	NA	NA	NA	NA	NA	NA	NA	NA	NA	NA	NA	NA	NA	NA	NA	NA	NA	negative	NA	NA	NA	NA	NA	NA	NA	NA	NA	NA	NA	NA	NA	NA	NA	NA	NA	NA	NA	NA
R079	50151202	R079_22	female	35	non-Severe	2020-02-03	2020-02-23	2020-01-28	2020/2/18	16	22	1	Yes	No	No	2	NA	NA	NA	NA	NA	NA	NA	NA	NA	NA	NA	NA	NA	negative	NA	NA	NA	NA	NA	NA	NA	NA	NA	NA	NA	NA	NA	NA	NA	NA	NA	NA	NA
R079	50151202	R079_23	female	35	non-Severe	2020-02-03	2020-02-23	2020-01-28	2020-02-19	17	23	NA	NA	NA	NA	NA	NA	NA	NA	NA	NA	NA	NA	NA	NA	NA	NA	negative	NA	negative	NA	NA	NA	NA	NA	NA	NA	NA	NA	NA	NA	NA	NA	NA	NA	NA	NA	NA	NA
R079	50151202	R079_24	female	35	non-Severe	2020-02-03	2020-02-23	2020-01-28	2020-02-20	18	24	NA	NA	NA	NA	NA	NA	NA	NA	NA	NA	NA	NA	NA	NA	NA	NA	NA	NA	NA	63	110	NA	5.06	191	NA	NA	NA	NA	NA	NA	NA	NA	NA	NA	NA	NA	NA	NA
R079	50151202	R079_25	female	35	non-Severe	2020-02-03	2020-02-23	2020-01-28	2020-02-21	19	25	NA	NA	NA	NA	NA	NA	NA	NA	NA	NA	NA	NA	NA	NA	NA	NA	NA	NA	NA	NA	NA	NA	NA	NA	NA	NA	NA	NA	NA	NA	NA	NA	NA	NA	NA	NA	NA	NA
R079	50151202	R079_26	female	35	non-Severe	2020-02-03	2020-02-23	2020-01-28	2020-02-22	20	26	NA	NA	NA	NA	NA	NA	NA	NA	NA	NA	NA	NA	NA	NA	NA	NA	NA	NA	NA	NA	NA	NA	NA	NA	NA	NA	NA	NA	NA	NA	NA	NA	NA	NA	NA	NA	NA	NA
R079	50151202	R079_41	female	35	non-Severe	2020-02-03	2020-02-23	2020-01-28	2020-03-08	35	41	NA	NA	NA	NA	NA	NA	NA	NA	NA	NA	NA	NA	NA	NA	NA	NA	negative	negative	NA	NA	NA	NA	NA	NA	NA	NA	NA	NA	NA	NA	NA	NA	NA	NA	NA	NA	NA	NA
R079	50151202	R079_56	female	35	non-Severe	2020-02-03	2020-02-23	2020-01-28	2020-03-23	50	56	NA	NA	NA	NA	NA	NA	NA	NA	NA	NA	NA	NA	NA	NA	NA	NA	negative	negative	NA	NA	NA	NA	NA	NA	NA	NA	NA	NA	NA	NA	NA	NA	NA	NA	NA	NA	NA	NA
R079	50151202	R079_7	female	35	non-Severe	2020-02-03	2020-02-23	2020-01-28	2020-02-03	1	7	NA	NA	NA	NA	NA	NA	NA	NA	NA	NA	NA	NA	NA	NA	NA	NA	NA	negative	NA	59	114	30.5	3.04	189	6	1.03	negative	negative	1+	negative	negative	negative	negative	negative	negative	0	10	54
R079	50151202	R079_744	female	35	non-Severe	2020-02-03	2020-02-23	2020-01-28	2022-02-09	738	744	0	No	No	No	0	NA	NA	NA	NA	NA	NA	NA	NA	NA	NA	NA	NA	NA	NA	54	115	45.5	7.38	269	7.5	1.029	negative	+-	negative	negative	negative	negative	1+	negative	negative	0	5	28
R079	50151202	R079_8	female	35	non-Severe	2020-02-03	2020-02-23	2020-01-28	2020/2/4	2	8	1	Yes	Yes	No	4	NA	NA	NA	NA	NA	NA	NA	NA	NA	NA	NA	positive	NA	negative	NA	NA	NA	NA	NA	NA	NA	NA	NA	NA	NA	NA	NA	NA	NA	NA	NA	NA	NA
R079	50151202	R079_9	female	35	non-Severe	2020-02-03	2020-02-23	2020-01-28	2020/2/5	3	9	NA	NA	NA	NA	NA	NA	NA	NA	NA	NA	NA	NA	NA	NA	Yes	NA	NA	NA	NA	NA	NA	NA	NA	NA	NA	NA	NA	NA	NA	NA	NA	NA	NA	NA	NA	NA	NA	NA
R080	50151207	R080_10	male	51	Severe	2020-02-03	2020-02-21	2020-01-31	2020-02-09	7	10	NA	NA	NA	NA	NA	NA	NA	NA	NA	NA	NA	NA	NA	NA	NA	NA	NA	NA	NA	NA	NA	NA	NA	NA	NA	NA	NA	NA	NA	NA	NA	NA	NA	NA	NA	NA	NA	NA
R080	50151207	R080_11	male	51	Severe	2020-02-03	2020-02-21	2020-01-31	2020-02-10	8	11	5	Yes	Yes	Yes	11	NA	NA	NA	NA	NA	NA	NA	NA	NA	NA	NA	NA	NA	NA	91	84	26.5	3.31	353	NA	NA	NA	NA	NA	NA	NA	NA	NA	NA	NA	NA	NA	NA
R080	50151207	R080_12	male	51	Severe	2020-02-03	2020-02-21	2020-01-31	2020-02-11	9	12	NA	NA	NA	NA	NA	NA	NA	NA	NA	NA	NA	NA	NA	NA	NA	NA	NA	NA	negative	NA	NA	NA	NA	NA	NA	NA	NA	NA	NA	NA	NA	NA	NA	NA	NA	NA	NA	NA
R080	50151207	R080_13	male	51	Severe	2020-02-03	2020-02-21	2020-01-31	2020-02-12	10	13	NA	NA	NA	NA	NA	NA	NA	NA	NA	NA	NA	NA	NA	NA	NA	NA	NA	NA	NA	NA	NA	NA	NA	NA	NA	NA	NA	NA	NA	NA	NA	NA	NA	NA	NA	NA	NA	NA
R080	50151207	R080_133	male	51	Severe	2020-02-03	2020-02-21	2020-01-31	2020-06-11	130	133	NA	NA	NA	NA	NA	NA	NA	NA	NA	NA	NA	NA	NA	NA	NA	NA	NA	NA	NA	87	88	NA	6.58	594	5.5	1.02	negative	negative	negative	negative	negative	negative	negative	negative	negative	0	2	11
R080	50151207	R080_16	male	51	Severe	2020-02-03	2020-02-21	2020-01-31	2020-02-15	13	16	NA	NA	NA	NA	NA	NA	NA	NA	NA	NA	NA	NA	NA	NA	NA	NA	NA	NA	negative	NA	NA	NA	NA	NA	NA	NA	NA	NA	NA	NA	NA	NA	NA	NA	NA	NA	NA	NA
R080	50151207	R080_17	male	51	Severe	2020-02-03	2020-02-21	2020-01-31	2020-02-16	14	17	NA	NA	NA	NA	NA	NA	NA	NA	NA	NA	NA	NA	NA	NA	NA	NA	NA	negative	NA	NA	NA	NA	NA	NA	NA	NA	NA	NA	NA	NA	NA	NA	NA	NA	NA	NA	NA	NA
R080	50151207	R080_18	male	51	Severe	2020-02-03	2020-02-21	2020-01-31	2020-02-17	15	18	NA	NA	NA	NA	NA	NA	NA	NA	NA	NA	NA	NA	NA	NA	NA	NA	negative	NA	negative	NA	NA	NA	NA	NA	NA	NA	NA	NA	NA	NA	NA	NA	NA	NA	NA	NA	NA	NA
R080	50151207	R080_19	male	51	Severe	2020-02-03	2020-02-21	2020-01-31	2020-02-18	16	19	NA	NA	NA	NA	NA	NA	NA	NA	NA	NA	NA	NA	NA	NA	NA	NA	NA	NA	NA	NA	NA	NA	NA	NA	NA	NA	NA	NA	NA	NA	NA	NA	NA	NA	NA	NA	NA	NA
R080	50151207	R080_20	male	51	Severe	2020-02-03	2020-02-21	2020-01-31	2020-02-19	17	20	NA	NA	NA	NA	NA	NA	NA	NA	NA	NA	NA	NA	NA	NA	NA	NA	NA	NA	NA	NA	NA	NA	NA	NA	NA	NA	NA	NA	NA	NA	NA	NA	NA	NA	NA	NA	NA	NA
R080	50151207	R080_21	male	51	Severe	2020-02-03	2020-02-21	2020-01-31	2020-02-20	18	21	5	Yes	No	Yes	9	NA	NA	NA	NA	NA	NA	NA	NA	NA	NA	NA	NA	negative	NA	NA	NA	NA	NA	NA	NA	NA	NA	NA	NA	NA	NA	NA	NA	NA	NA	NA	NA	NA
R080	50151207	R080_22	male	51	Severe	2020-02-03	2020-02-21	2020-01-31	2020-02-21	19	22	NA	NA	NA	NA	NA	NA	Yes	NA	NA	NA	NA	NA	NA	NA	NA	NA	NA	NA	NA	NA	NA	NA	NA	NA	NA	NA	NA	NA	NA	NA	NA	NA	NA	NA	NA	NA	NA	NA
R080	50151207	R080_36	male	51	Severe	2020-02-03	2020-02-21	2020-01-31	2020-03-06	33	36	NA	NA	NA	NA	NA	NA	NA	NA	NA	NA	NA	NA	NA	NA	NA	NA	negative	negative	NA	91	103	NA	3.33	381	5.5	1.02	negative	negative	negative	negative	negative	negative	negative	negative	negative	0	4	20
R080	50151207	R080_375	male	51	Severe	2020-02-03	2020-02-21	2020-01-31	2021-02-08	372	375	1	Yes	No	No	2	NA	Yes	NA	NA	NA	NA	NA	Yes	NA	NA	NA	NA	NA	negative	86	89	40.5	4.52	448	5	1.021	NA	negative	NA	negative	negative	negative	negative	negative	negative	NA	NA	0
R080	50151207	R080_4	male	51	Severe	2020-02-03	2020-02-21	2020-01-31	2020-02-03	1	4	NA	NA	NA	NA	NA	NA	NA	NA	NA	NA	NA	NA	NA	NA	NA	NA	NA	NA	NA	89	86	32	4.01	416	5.5	1.03	negative	+-	+-	negative	negative	negative	negative	negative	negative	0	3	16
R080	50151207	R080_5	male	51	Severe	2020-02-03	2020-02-21	2020-01-31	2020-02-04	2	5	5	Yes	Yes	Yes	11	Yes	Yes	Yes	NA	NA	Yes	NA	NA	NA	NA	NA	NA	NA	NA	NA	NA	NA	NA	NA	NA	NA	NA	NA	NA	NA	NA	NA	NA	NA	NA	NA	NA	NA
R080	50151207	R080_6	male	51	Severe	2020-02-03	2020-02-21	2020-01-31	2020-02-05	3	6	NA	NA	NA	NA	NA	NA	NA	NA	NA	NA	NA	NA	Yes	NA	Yes	NA	NA	NA	NA	NA	NA	NA	NA	NA	NA	NA	NA	NA	NA	NA	NA	NA	NA	NA	NA	NA	NA	NA
R080	50151207	R080_7	male	51	Severe	2020-02-03	2020-02-21	2020-01-31	2020-02-06	4	7	NA	NA	NA	NA	NA	NA	NA	NA	NA	NA	NA	NA	NA	NA	NA	NA	NA	NA	NA	NA	NA	NA	NA	NA	NA	NA	NA	NA	NA	NA	NA	NA	NA	NA	NA	NA	NA	NA
R080	50151207	R080_741	male	51	Severe	2020-02-03	2020-02-21	2020-01-31	2022-02-09	738	741	1	Yes	No	No	2	NA	NA	NA	NA	NA	NA	NA	NA	NA	NA	NA	NA	NA	NA	78	97	38.7	5.9	462	6.5	1.025	negative	negative	negative	negative	negative	negative	negative	negative	negative	0	0	1
R080	50151207	R080_9	male	51	Severe	2020-02-03	2020-02-21	2020-01-31	2020-02-08	6	9	NA	NA	NA	NA	NA	NA	NA	NA	NA	NA	NA	NA	NA	NA	NA	NA	NA	NA	NA	NA	NA	NA	NA	NA	NA	NA	NA	NA	NA	NA	NA	NA	NA	NA	NA	NA	NA	NA
R081	50151219	R081_12	female	34	non-Severe	2020-02-03	2020-03-02	2020-01-31	2020-02-11	9	12	4	Yes	No	No	5	NA	NA	NA	NA	NA	NA	NA	NA	NA	NA	NA	NA	NA	negative	NA	NA	NA	NA	NA	NA	NA	NA	NA	NA	NA	NA	NA	NA	NA	NA	NA	NA	NA
R081	50151219	R081_13	female	34	non-Severe	2020-02-03	2020-03-02	2020-01-31	2020-02-12	10	13	NA	NA	NA	NA	NA	NA	NA	NA	NA	NA	NA	NA	NA	NA	NA	NA	NA	NA	NA	58	116	NA	3.31	263	NA	NA	NA	NA	NA	NA	NA	NA	NA	NA	NA	NA	NA	NA
R081	50151219	R081_15	female	34	non-Severe	2020-02-03	2020-03-02	2020-01-31	2020-02-14	12	15	NA	NA	NA	NA	NA	NA	NA	NA	NA	NA	NA	NA	NA	NA	NA	NA	NA	NA	NA	NA	NA	NA	NA	NA	NA	NA	NA	NA	NA	NA	NA	NA	NA	NA	NA	NA	NA	NA
R081	50151219	R081_18	female	34	non-Severe	2020-02-03	2020-03-02	2020-01-31	2020-02-17	15	18	NA	NA	NA	NA	NA	NA	NA	NA	NA	NA	NA	NA	NA	NA	NA	NA	NA	NA	negative	NA	NA	NA	NA	NA	NA	NA	NA	NA	NA	NA	NA	NA	NA	NA	NA	NA	NA	NA
R081	50151219	R081_19	female	34	non-Severe	2020-02-03	2020-03-02	2020-01-31	2020-02-18	16	19	NA	NA	NA	NA	NA	NA	NA	NA	Yes	NA	NA	NA	NA	NA	NA	NA	NA	NA	NA	62	113	24.1	3.6	354	NA	NA	NA	NA	NA	NA	NA	NA	NA	NA	NA	NA	NA	NA
R081	50151219	R081_20	female	34	non-Severe	2020-02-03	2020-03-02	2020-01-31	2020-02-19	17	20	NA	NA	NA	NA	NA	NA	NA	NA	NA	NA	NA	NA	NA	NA	NA	NA	negative	positive	negative	NA	NA	NA	NA	NA	NA	NA	NA	NA	NA	NA	NA	NA	NA	NA	NA	NA	NA	NA
R081	50151219	R081_22	female	34	non-Severe	2020-02-03	2020-03-02	2020-01-31	2020-02-21	19	22	NA	NA	NA	NA	NA	NA	NA	NA	NA	NA	NA	NA	NA	NA	NA	NA	negative	positive	NA	NA	NA	NA	NA	NA	NA	NA	NA	NA	NA	NA	NA	NA	NA	NA	NA	NA	NA	NA
R081	50151219	R081_24	female	34	non-Severe	2020-02-03	2020-03-02	2020-01-31	2020-02-23	21	24	NA	NA	NA	NA	NA	NA	NA	NA	NA	NA	NA	NA	NA	NA	NA	NA	negative	positive	NA	NA	NA	NA	NA	NA	NA	NA	NA	NA	NA	NA	NA	NA	NA	NA	NA	NA	NA	NA
R081	50151219	R081_25	female	34	non-Severe	2020-02-03	2020-03-02	2020-01-31	2020-02-24	22	25	NA	NA	NA	NA	NA	NA	NA	NA	NA	NA	NA	NA	NA	NA	NA	NA	NA	NA	negative	NA	NA	NA	NA	NA	NA	NA	NA	NA	NA	NA	NA	NA	NA	NA	NA	NA	NA	NA
R081	50151219	R081_26	female	34	non-Severe	2020-02-03	2020-03-02	2020-01-31	2020-02-25	23	26	NA	NA	NA	NA	NA	NA	NA	NA	NA	NA	NA	NA	NA	NA	NA	NA	negative	positive	NA	NA	NA	NA	NA	NA	NA	NA	NA	NA	NA	NA	NA	NA	NA	NA	NA	NA	NA	NA
R081	50151219	R081_29	female	34	non-Severe	2020-02-03	2020-03-02	2020-01-31	2020-02-28	26	29	NA	NA	NA	NA	NA	NA	NA	NA	NA	NA	NA	NA	NA	NA	NA	NA	negative	negative	NA	NA	NA	NA	NA	NA	NA	NA	NA	NA	NA	NA	NA	NA	NA	NA	NA	NA	NA	NA
R081	50151219	R081_31	female	34	non-Severe	2020-02-03	2020-03-02	2020-01-31	2020-03-01	28	31	1	Yes	No	No	2	NA	NA	NA	Yes	NA	NA	NA	NA	NA	NA	NA	NA	negative	NA	58	116	41.2	3.22	221	NA	NA	NA	NA	NA	NA	NA	NA	NA	NA	NA	NA	NA	NA
R081	50151219	R081_4	female	34	non-Severe	2020-02-03	2020-03-02	2020-01-31	2020-02-03	1	4	NA	NA	NA	NA	NA	NA	NA	NA	Yes	NA	NA	NA	NA	NA	NA	NA	NA	NA	positive	58	116	38.3	2.67	304	NA	NA	NA	NA	NA	NA	NA	NA	NA	NA	NA	NA	NA	NA
R081	50151219	R081_40	female	34	non-Severe	2020-02-03	2020-03-02	2020-01-31	2020-03-10	37	40	NA	NA	NA	NA	NA	NA	NA	NA	NA	NA	NA	NA	NA	NA	NA	NA	NA	NA	NA	NA	NA	NA	NA	NA	NA	NA	NA	NA	NA	NA	NA	NA	NA	NA	NA	NA	NA	NA
R081	50151219	R081_5	female	34	non-Severe	2020-02-03	2020-03-02	2020-01-31	2020-02-04	2	5	2	Yes	No	No	3	NA	NA	NA	Yes	NA	NA	NA	NA	NA	NA	NA	NA	NA	NA	NA	NA	NA	NA	NA	NA	NA	NA	NA	NA	NA	NA	NA	NA	NA	NA	NA	NA	NA
R081	50151219	R081_6	female	34	non-Severe	2020-02-03	2020-03-02	2020-01-31	2020-02-05	3	6	NA	NA	NA	NA	NA	NA	NA	NA	NA	NA	NA	NA	NA	NA	NA	NA	NA	positive	NA	NA	NA	NA	NA	NA	NA	NA	NA	NA	NA	NA	NA	NA	NA	NA	NA	NA	NA	NA
R081	50151219	R081_8	female	34	non-Severe	2020-02-03	2020-03-02	2020-01-31	2020-02-07	5	8	NA	NA	NA	NA	NA	NA	NA	NA	NA	NA	NA	NA	NA	NA	NA	NA	NA	NA	negative	NA	NA	NA	NA	NA	NA	NA	NA	NA	NA	NA	NA	NA	NA	NA	NA	NA	NA	NA
R082	50151236	R082_10	male	70	Severe	2020-02-04	2020-02-23	2020-02-01	2020-02-10	7	10	NA	NA	NA	NA	NA	NA	NA	NA	NA	NA	NA	NA	NA	NA	NA	NA	NA	NA	NA	NA	NA	NA	NA	NA	NA	NA	NA	NA	NA	NA	NA	NA	NA	NA	NA	NA	NA	NA
R082	50151236	R082_12	male	70	Severe	2020-02-04	2020-02-23	2020-02-01	2020-02-12	9	12	NA	NA	NA	NA	NA	NA	NA	NA	NA	NA	NA	NA	NA	NA	NA	NA	NA	NA	NA	79	86	NA	8.85	275	NA	NA	NA	NA	NA	NA	NA	NA	NA	NA	NA	NA	NA	NA
R082	50151236	R082_14	male	70	Severe	2020-02-04	2020-02-23	2020-02-01	2020-02-14	11	14	5	Yes	No	Yes	9	NA	NA	NA	NA	NA	NA	NA	NA	NA	NA	NA	NA	NA	negative	NA	NA	NA	NA	NA	NA	NA	NA	NA	NA	NA	NA	NA	NA	NA	NA	NA	NA	NA
R082	50151236	R082_17	male	70	Severe	2020-02-04	2020-02-23	2020-02-01	2020-02-17	14	17	NA	NA	NA	NA	NA	NA	NA	NA	NA	NA	NA	NA	NA	NA	NA	NA	NA	NA	negative	NA	NA	NA	NA	NA	NA	NA	NA	NA	NA	NA	NA	NA	NA	NA	NA	NA	NA	NA
R082	50151236	R082_19	male	70	Severe	2020-02-04	2020-02-23	2020-02-01	2020-02-19	16	19	NA	NA	NA	NA	NA	NA	NA	NA	NA	NA	NA	NA	NA	NA	NA	NA	NA	negative	negative	NA	NA	NA	NA	NA	NA	NA	NA	NA	NA	NA	NA	NA	NA	NA	NA	NA	NA	NA
R082	50151236	R082_20	male	70	Severe	2020-02-04	2020-02-23	2020-02-01	2020-02-20	17	20	5	Yes	No	No	6	NA	Yes	Yes	Yes	NA	NA	NA	NA	NA	NA	NA	NA	NA	NA	73	89	NA	3.6	261	NA	NA	NA	NA	NA	NA	NA	NA	NA	NA	NA	NA	NA	NA
R082	50151236	R082_21	male	70	Severe	2020-02-04	2020-02-23	2020-02-01	2020-02-21	18	21	NA	NA	NA	NA	NA	NA	NA	NA	NA	NA	NA	NA	NA	NA	NA	NA	NA	NA	NA	NA	NA	NA	NA	NA	NA	NA	NA	NA	NA	NA	NA	NA	NA	NA	NA	NA	NA	NA
R082	50151236	R082_22	male	70	Severe	2020-02-04	2020-02-23	2020-02-01	2020-02-22	19	22	NA	NA	NA	NA	NA	NA	NA	NA	NA	NA	NA	NA	NA	NA	NA	NA	NA	NA	NA	NA	NA	NA	NA	NA	NA	NA	NA	NA	NA	NA	NA	NA	NA	NA	NA	NA	NA	NA
R082	50151236	R082_37	male	70	Severe	2020-02-04	2020-02-23	2020-02-01	2020-03-08	34	37	NA	NA	NA	NA	NA	NA	NA	NA	NA	NA	NA	NA	NA	NA	NA	NA	positive	negative	NA	81	84	50.1	5.3	335	7	1.02	negative	negative	negative	negative	negative	negative	negative	negative	negative	0	0	0
R082	50151236	R082_374	male	70	Severe	2020-02-04	2020-02-23	2020-02-01	2021-02-08	371	374	0	No	No	No	0	NA	Yes	NA	NA	NA	NA	NA	NA	NA	NA	NA	NA	NA	negative	66	92	50.7	5.69	299	6	1.012	NA	negative	NA	negative	negative	negative	negative	negative	negative	NA	NA	0
R082	50151236	R082_38	male	70	Severe	2020-02-04	2020-02-23	2020-02-01	2020-03-09	35	38	NA	NA	NA	NA	NA	NA	NA	NA	NA	NA	NA	NA	NA	NA	NA	NA	negative	NA	NA	NA	NA	NA	NA	NA	NA	NA	NA	NA	NA	NA	NA	NA	NA	NA	NA	NA	NA	NA
R082	50151236	R082_4	male	70	Severe	2020-02-04	2020-02-23	2020-02-01	2020-02-04	1	4	NA	NA	NA	NA	NA	NA	Yes	Yes	Yes	NA	NA	NA	NA	NA	NA	NA	NA	negative	NA	85	80	25.5	4.82	252	5.5	1.02	+-	negative	negative	negative	negative	negative	negative	negative	negative	0	2	9
R082	50151236	R082_5	male	70	Severe	2020-02-04	2020-02-23	2020-02-01	2020-02-05	2	5	5	Yes	No	Yes	9	Yes	NA	Yes	NA	NA	Yes	NA	NA	NA	Yes	NA	NA	NA	NA	NA	NA	NA	NA	NA	NA	NA	NA	NA	NA	NA	NA	NA	NA	NA	NA	NA	NA	NA
R082	50151236	R082_7	male	70	Severe	2020-02-04	2020-02-23	2020-02-01	2020-02-07	4	7	NA	NA	NA	NA	NA	NA	NA	NA	NA	NA	NA	NA	NA	NA	NA	NA	NA	NA	NA	NA	NA	NA	NA	NA	NA	NA	NA	NA	NA	NA	NA	NA	NA	NA	NA	NA	NA	NA
R082	50151236	R082_8	male	70	Severe	2020-02-04	2020-02-23	2020-02-01	2020-02-08	5	8	NA	NA	NA	NA	NA	NA	NA	NA	NA	NA	NA	NA	NA	NA	NA	NA	NA	NA	NA	NA	NA	NA	NA	NA	NA	NA	NA	NA	NA	NA	NA	NA	NA	NA	NA	NA	NA	NA
R083	50151237	R083_11	male	70	non-Severe	2020-02-04	2020-03-03	2020-02-02	2020-02-12	9	11	NA	NA	NA	NA	NA	NA	NA	NA	NA	NA	NA	NA	NA	NA	NA	NA	NA	NA	positive	85	80	NA	4.01	334	NA	NA	NA	NA	NA	NA	NA	NA	NA	NA	NA	NA	NA	NA
R083	50151237	R083_17	male	70	non-Severe	2020-02-04	2020-03-03	2020-02-02	2020-02-18	15	17	NA	NA	NA	NA	NA	NA	NA	NA	NA	NA	NA	NA	NA	NA	NA	NA	NA	NA	positive	NA	NA	NA	NA	NA	NA	NA	NA	NA	NA	NA	NA	NA	NA	NA	NA	NA	NA	NA
R083	50151237	R083_18	male	70	non-Severe	2020-02-04	2020-03-03	2020-02-02	2020-02-19	16	18	5	Yes	No	Yes	9	NA	NA	NA	NA	NA	NA	NA	NA	NA	NA	NA	NA	NA	NA	81	84	1.7	3.8	326	NA	NA	NA	NA	NA	NA	NA	NA	NA	NA	NA	NA	NA	NA
R083	50151237	R083_20	male	70	non-Severe	2020-02-04	2020-03-03	2020-02-02	2020-02-21	18	20	NA	NA	NA	NA	NA	NA	NA	NA	NA	NA	NA	NA	NA	NA	NA	NA	positive	NA	NA	NA	NA	NA	NA	NA	NA	NA	NA	NA	NA	NA	NA	NA	NA	NA	NA	NA	NA	NA
R083	50151237	R083_23	male	70	non-Severe	2020-02-04	2020-03-03	2020-02-02	2020-02-24	21	23	NA	NA	NA	NA	NA	NA	NA	NA	NA	NA	NA	NA	NA	NA	NA	NA	negative	negative	NA	NA	NA	NA	NA	NA	NA	NA	NA	NA	NA	NA	NA	NA	NA	NA	NA	NA	NA	NA
R083	50151237	R083_26	male	70	non-Severe	2020-02-04	2020-03-03	2020-02-02	2020-02-27	24	26	NA	NA	NA	NA	NA	NA	NA	NA	NA	NA	NA	NA	NA	NA	NA	NA	negative	negative	NA	NA	NA	NA	NA	NA	NA	NA	NA	NA	NA	NA	NA	NA	NA	NA	NA	NA	NA	NA
R083	50151237	R083_28	male	70	non-Severe	2020-02-04	2020-03-03	2020-02-02	2020-02-29	26	28	5	Yes	No	No	6	NA	NA	NA	NA	NA	NA	NA	NA	NA	NA	NA	negative	negative	NA	79	86	8.5	4.4	360	NA	NA	NA	NA	NA	NA	NA	NA	NA	NA	NA	NA	NA	NA
R083	50151237	R083_3	male	70	non-Severe	2020-02-04	2020-03-03	2020-02-02	2020-02-04	1	3	NA	NA	NA	NA	NA	NA	NA	NA	NA	NA	NA	NA	NA	NA	NA	NA	NA	negative	NA	93	71	29.8	4.97	377	6	1.015	negative	negative	negative	negative	negative	negative	negative	negative	negative	0	0	2
R083	50151237	R083_4	male	70	non-Severe	2020-02-04	2020-03-03	2020-02-02	2020/2/5	2	4	NA	NA	NA	NA	NA	Yes	NA	Yes	NA	Yes	Yes	Yes	NA	Yes	Yes	NA	NA	NA	NA	NA	NA	NA	NA	NA	NA	NA	NA	NA	NA	NA	NA	NA	NA	NA	NA	NA	NA	NA
R083	50151237	R083_45	male	70	non-Severe	2020-02-04	2020-03-03	2020-02-02	2020-03-17	43	45	NA	NA	NA	NA	NA	NA	NA	NA	NA	NA	NA	NA	NA	NA	NA	NA	NA	negative	negative	92	72	NA	4.05	228	5.5	1.015	negative	negative	negative	negative	negative	negative	negative	negative	negative	0	0	1
R083	50151237	R083_6	male	70	non-Severe	2020-02-04	2020-03-03	2020-02-02	2020-02-07	4	6	NA	NA	NA	NA	NA	NA	NA	NA	NA	NA	NA	NA	NA	NA	NA	NA	NA	NA	positive	NA	NA	NA	NA	NA	NA	NA	NA	NA	NA	NA	NA	NA	NA	NA	NA	NA	NA	NA
R083	50151237	R083_61	male	70	non-Severe	2020-02-04	2020-03-03	2020-02-02	2020-04-02	59	61	NA	NA	NA	NA	NA	NA	NA	NA	NA	NA	NA	NA	NA	NA	NA	NA	negative	NA	NA	74.5	88.5	36.8	4.195	284.5	NA	NA	NA	NA	NA	NA	NA	NA	NA	NA	NA	NA	NA	NA
R083	50151237	R083_62	male	70	non-Severe	2020-02-04	2020-03-03	2020-02-02	2020-04-03	60	62	NA	NA	NA	NA	NA	NA	NA	NA	NA	NA	NA	NA	NA	NA	NA	NA	negative	NA	NA	NA	NA	NA	NA	NA	NA	NA	NA	NA	NA	NA	NA	NA	NA	NA	NA	NA	NA	NA
R083	50151237	R083_9	male	70	non-Severe	2020-02-04	2020-03-03	2020-02-02	2020/2/10	7	9	5	Yes	No	No	6	NA	NA	NA	NA	NA	NA	NA	NA	NA	NA	NA	positive	positive	NA	NA	NA	NA	NA	NA	NA	NA	NA	NA	NA	NA	NA	NA	NA	NA	NA	NA	NA	NA
R084	50151243	R084_10	male	43	Severe	2020-02-04	2020-03-01	2020-02-02	2020-02-11	8	10	NA	NA	NA	NA	NA	NA	NA	NA	NA	NA	NA	NA	NA	NA	NA	NA	NA	NA	NA	NA	NA	NA	NA	NA	NA	NA	NA	NA	NA	NA	NA	NA	NA	NA	NA	NA	NA	NA
R084	50151243	R084_13	male	43	Severe	2020-02-04	2020-03-01	2020-02-02	2020-02-14	11	13	NA	NA	NA	NA	NA	NA	NA	NA	NA	NA	NA	NA	NA	NA	NA	NA	NA	NA	NA	NA	NA	NA	NA	NA	NA	NA	NA	NA	NA	NA	NA	NA	NA	NA	NA	NA	NA	NA
R084	50151243	R084_15	male	43	Severe	2020-02-04	2020-03-01	2020-02-02	2020-02-16	13	15	NA	NA	NA	NA	NA	NA	NA	NA	NA	NA	NA	NA	NA	NA	NA	NA	NA	NA	NA	104	75	57.2	6.27	306	NA	NA	NA	NA	NA	NA	NA	NA	NA	NA	NA	NA	NA	NA
R084	50151243	R084_16	male	43	Severe	2020-02-04	2020-03-01	2020-02-02	2020-02-17	14	16	NA	NA	NA	NA	NA	NA	NA	NA	NA	NA	NA	NA	NA	NA	NA	NA	NA	NA	negative	NA	NA	NA	NA	NA	NA	NA	NA	NA	NA	NA	NA	NA	NA	NA	NA	NA	NA	NA
R084	50151243	R084_18	male	43	Severe	2020-02-04	2020-03-01	2020-02-02	2020-02-19	16	18	NA	NA	NA	NA	NA	NA	NA	NA	NA	NA	NA	NA	NA	NA	NA	NA	NA	negative	negative	NA	NA	NA	NA	NA	NA	NA	NA	NA	NA	NA	NA	NA	NA	NA	NA	NA	NA	NA
R084	50151243	R084_2	male	43	Severe	2020-02-04	2020-03-01	2020-02-02	2020-02-03	0	2	NA	NA	NA	NA	NA	NA	NA	NA	NA	NA	NA	NA	NA	NA	NA	NA	positive	NA	negative	NA	NA	NA	NA	NA	NA	NA	NA	NA	NA	NA	NA	NA	NA	NA	NA	NA	NA	NA
R084	50151243	R084_20	male	43	Severe	2020-02-04	2020-03-01	2020-02-02	2020-02-21	18	20	NA	NA	NA	NA	NA	NA	NA	NA	NA	NA	NA	NA	NA	NA	NA	NA	negative	NA	NA	NA	NA	NA	NA	NA	NA	NA	NA	NA	NA	NA	NA	NA	NA	NA	NA	NA	NA	NA
R084	50151243	R084_22	male	43	Severe	2020-02-04	2020-03-01	2020-02-02	2020-02-23	20	22	NA	NA	NA	NA	NA	NA	NA	NA	NA	NA	NA	NA	NA	NA	NA	NA	NA	NA	NA	96	83	44.4	4.1	348	NA	NA	NA	NA	NA	NA	NA	NA	NA	NA	NA	NA	NA	NA
R084	50151243	R084_23	male	43	Severe	2020-02-04	2020-03-01	2020-02-02	2020-02-24	21	23	NA	NA	NA	NA	NA	NA	NA	NA	NA	NA	NA	NA	NA	NA	NA	NA	NA	negative	negative	NA	NA	NA	NA	NA	NA	NA	NA	NA	NA	NA	NA	NA	NA	NA	NA	NA	NA	NA
R084	50151243	R084_24	male	43	Severe	2020-02-04	2020-03-01	2020-02-02	2020-02-25	22	24	NA	NA	NA	NA	NA	NA	NA	NA	NA	NA	NA	NA	NA	NA	NA	NA	negative	NA	NA	NA	NA	NA	NA	NA	NA	NA	NA	NA	NA	NA	NA	NA	NA	NA	NA	NA	NA	NA
R084	50151243	R084_26	male	43	Severe	2020-02-04	2020-03-01	2020-02-02	2020-02-27	24	26	NA	NA	NA	NA	NA	NA	NA	NA	NA	NA	NA	NA	NA	NA	NA	NA	negative	negative	NA	NA	NA	NA	NA	NA	NA	NA	NA	NA	NA	NA	NA	NA	NA	NA	NA	NA	NA	NA
R084	50151243	R084_27	male	43	Severe	2020-02-04	2020-03-01	2020-02-02	2020-02-28	25	27	2	Yes	No	No	3	NA	Yes	NA	NA	NA	NA	NA	NA	NA	NA	NA	NA	NA	NA	88	92	38.9	4.03	354	NA	NA	NA	NA	NA	NA	NA	NA	NA	NA	NA	NA	NA	NA
R084	50151243	R084_28	male	43	Severe	2020-02-04	2020-03-01	2020-02-02	2020-02-29	26	28	NA	NA	NA	NA	NA	NA	NA	NA	NA	NA	NA	NA	NA	NA	NA	NA	NA	NA	NA	NA	NA	NA	NA	NA	NA	NA	NA	NA	NA	NA	NA	NA	NA	NA	NA	NA	NA	NA
R084	50151243	R084_3	male	43	Severe	2020-02-04	2020-03-01	2020-02-02	2020-02-04	1	3	NA	NA	NA	NA	NA	NA	NA	NA	NA	NA	NA	NA	NA	NA	NA	NA	NA	negative	NA	95	84	35.2	4.22	300	6	1.015	negative	3+	negative	+-	negative	negative	negative	negative	negative	0	2	11
R084	50151243	R084_32	male	43	Severe	2020-02-04	2020-03-01	2020-02-02	2020-03-04	30	32	NA	NA	NA	NA	NA	NA	NA	NA	NA	NA	NA	NA	NA	NA	NA	NA	negative	negative	NA	NA	NA	NA	NA	NA	NA	NA	NA	NA	NA	NA	NA	NA	NA	NA	NA	NA	NA	NA
R084	50151243	R084_385	male	43	Severe	2020-02-04	2020-03-01	2020-02-02	2021-02-20	383	385	2	Yes	No	No	3	NA	Yes	NA	NA	NA	NA	NA	Yes	NA	NA	NA	negative	NA	NA	71	108	46.7	5.28	305	5.5	1.022	NA	1+	NA	negative	negative	negative	negative	negative	negative	NA	NA	0
R084	50151243	R084_4	male	43	Severe	2020-02-04	2020-03-01	2020-02-02	2020-02-05	2	4	2	Yes	Yes	No	5	Yes	Yes	Yes	NA	NA	Yes	NA	Yes	NA	Yes	NA	NA	negative	NA	NA	NA	NA	NA	NA	NA	NA	NA	NA	NA	NA	NA	NA	NA	NA	NA	NA	NA	NA
R084	50151243	R084_43	male	43	Severe	2020-02-04	2020-03-01	2020-02-02	2020-03-15	41	43	NA	NA	NA	NA	NA	NA	NA	NA	NA	NA	NA	NA	NA	NA	NA	NA	negative	negative	NA	89	90	NA	4.57	365	5	1.03	negative	3+	negative	negative	negative	negative	negative	negative	negative	0	1	7
R084	50151243	R084_6	male	43	Severe	2020-02-04	2020-03-01	2020-02-02	2020-02-07	4	6	NA	NA	NA	NA	NA	NA	NA	NA	NA	NA	NA	NA	NA	NA	NA	NA	NA	NA	NA	NA	NA	NA	NA	NA	NA	NA	NA	NA	NA	NA	NA	NA	NA	NA	NA	NA	NA	NA
R084	50151243	R084_7	male	43	Severe	2020-02-04	2020-03-01	2020-02-02	2020-02-08	5	7	NA	NA	NA	NA	NA	NA	NA	NA	NA	NA	NA	NA	NA	NA	NA	NA	NA	NA	NA	NA	NA	NA	NA	NA	NA	NA	NA	NA	NA	NA	NA	NA	NA	NA	NA	NA	NA	NA
R084	50151243	R084_8	male	43	Severe	2020-02-04	2020-03-01	2020-02-02	2020-02-09	6	8	NA	NA	NA	NA	NA	NA	NA	NA	NA	NA	NA	NA	NA	NA	NA	NA	NA	NA	NA	NA	NA	NA	NA	NA	NA	NA	NA	NA	NA	NA	NA	NA	NA	NA	NA	NA	NA	NA
R084	50151243	R084_9	male	43	Severe	2020-02-04	2020-03-01	2020-02-02	2020-02-10	7	9	NA	NA	NA	NA	NA	NA	NA	NA	NA	NA	NA	NA	NA	NA	NA	NA	NA	NA	NA	NA	NA	NA	NA	NA	NA	NA	NA	NA	NA	NA	NA	NA	NA	NA	NA	NA	NA	NA
R085	50151268	R085_11	female	37	non-Severe	2020-02-05	2020-03-03	2020-02-02	2020-02-12	8	11	NA	NA	NA	NA	NA	NA	NA	NA	NA	NA	NA	NA	NA	NA	NA	NA	NA	NA	NA	NA	NA	NA	NA	NA	NA	NA	NA	NA	NA	NA	NA	NA	NA	NA	NA	NA	NA	NA
R085	50151268	R085_12	female	37	non-Severe	2020-02-05	2020-03-03	2020-02-02	2020-02-13	9	12	1	Yes	No	No	2	NA	NA	NA	NA	NA	NA	NA	NA	NA	NA	NA	negative	NA	negative	NA	NA	NA	NA	NA	NA	NA	NA	NA	NA	NA	NA	NA	NA	NA	NA	NA	NA	NA
R085	50151268	R085_13	female	37	non-Severe	2020-02-05	2020-03-03	2020-02-02	2020-02-14	10	13	NA	NA	NA	NA	NA	NA	NA	NA	NA	NA	NA	NA	NA	NA	NA	NA	NA	NA	NA	57	114	35.1	3.73	170	NA	NA	NA	NA	NA	NA	NA	NA	NA	NA	NA	NA	NA	NA
R085	50151268	R085_14	female	37	non-Severe	2020-02-05	2020-03-03	2020-02-02	2020-02-15	11	14	NA	NA	NA	NA	NA	NA	NA	NA	NA	NA	NA	NA	NA	NA	NA	NA	NA	NA	negative	NA	NA	NA	NA	NA	NA	NA	NA	NA	NA	NA	NA	NA	NA	NA	NA	NA	NA	NA
R085	50151268	R085_16	female	37	non-Severe	2020-02-05	2020-03-03	2020-02-02	2020-02-17	13	16	NA	NA	NA	NA	NA	NA	NA	NA	NA	NA	NA	NA	NA	NA	NA	NA	NA	NA	negative	NA	NA	NA	NA	NA	NA	NA	NA	NA	NA	NA	NA	NA	NA	NA	NA	NA	NA	NA
R085	50151268	R085_18	female	37	non-Severe	2020-02-05	2020-03-03	2020-02-02	2020-02-19	15	18	NA	NA	NA	NA	NA	NA	NA	NA	NA	NA	NA	NA	NA	NA	NA	NA	positive	positive	negative	NA	NA	NA	NA	NA	NA	NA	NA	NA	NA	NA	NA	NA	NA	NA	NA	NA	NA	NA
R085	50151268	R085_19	female	37	non-Severe	2020-02-05	2020-03-03	2020-02-02	2020-02-20	16	19	NA	NA	NA	NA	NA	NA	NA	NA	NA	NA	NA	NA	NA	NA	NA	NA	NA	NA	NA	59	113	NA	2.81	204	NA	NA	NA	NA	NA	NA	NA	NA	NA	NA	NA	NA	NA	NA
R085	50151268	R085_21	female	37	non-Severe	2020-02-05	2020-03-03	2020-02-02	2020-02-22	18	21	NA	NA	NA	NA	NA	NA	NA	NA	NA	NA	NA	NA	NA	NA	NA	NA	NA	positive	NA	NA	NA	NA	NA	NA	NA	NA	NA	NA	NA	NA	NA	NA	NA	NA	NA	NA	NA	NA
R085	50151268	R085_22	female	37	non-Severe	2020-02-05	2020-03-03	2020-02-02	2020-02-23	19	22	NA	NA	NA	NA	NA	NA	NA	NA	NA	NA	NA	NA	NA	NA	NA	NA	negative	NA	NA	NA	NA	NA	NA	NA	NA	NA	NA	NA	NA	NA	NA	NA	NA	NA	NA	NA	NA	NA
R085	50151268	R085_23	female	37	non-Severe	2020-02-05	2020-03-03	2020-02-02	2020-02-24	20	23	NA	NA	NA	NA	NA	NA	NA	NA	NA	NA	NA	NA	NA	NA	NA	NA	NA	NA	negative	NA	NA	NA	NA	NA	NA	NA	NA	NA	NA	NA	NA	NA	NA	NA	NA	NA	NA	NA
R085	50151268	R085_24	female	37	non-Severe	2020-02-05	2020-03-03	2020-02-02	2020-02-25	21	24	NA	NA	NA	NA	NA	NA	NA	NA	NA	NA	NA	NA	NA	NA	NA	NA	negative	positive	NA	NA	NA	NA	NA	NA	NA	NA	NA	NA	NA	NA	NA	NA	NA	NA	NA	NA	NA	NA
R085	50151268	R085_27	female	37	non-Severe	2020-02-05	2020-03-03	2020-02-02	2020-02-28	24	27	NA	NA	NA	NA	NA	NA	NA	NA	NA	NA	NA	NA	NA	NA	NA	NA	negative	positive	NA	62	111	34.6	2.94	187	NA	NA	NA	NA	NA	NA	NA	NA	NA	NA	NA	NA	NA	NA
R085	50151268	R085_30	female	37	non-Severe	2020-02-05	2020-03-03	2020-02-02	2020/3/2	27	30	0	No	No	No	0	NA	NA	NA	NA	NA	NA	NA	NA	NA	NA	NA	positive	NA	positive	NA	NA	NA	NA	NA	NA	NA	NA	NA	NA	NA	NA	NA	NA	NA	NA	NA	NA	NA
R085	50151268	R085_385	female	37	non-Severe	2020-02-05	2020-03-03	2020-02-02	2021-02-20	382	385	0	No	No	No	0	NA	NA	NA	NA	NA	NA	NA	Yes	NA	NA	NA	negative	NA	NA	48	120	40.4	3.64	197	5	1.012	NA	+-	NA	negative	negative	negative	negative	negative	negative	NA	NA	0
R085	50151268	R085_4	female	37	non-Severe	2020-02-05	2020-03-03	2020-02-02	2020-02-05	1	4	NA	NA	NA	NA	NA	NA	NA	NA	NA	NA	NA	NA	NA	NA	NA	NA	NA	negative	NA	58	113	29.3	2.29	147	5.5	1.03	negative	3+	1+	negative	negative	negative	negative	negative	1+	0	9	52
R085	50151268	R085_5	female	37	non-Severe	2020-02-05	2020-03-03	2020-02-02	2020/2/6	2	5	NA	NA	NA	NA	NA	NA	NA	Yes	NA	Yes	NA	NA	NA	NA	NA	NA	NA	NA	NA	NA	NA	NA	NA	NA	NA	NA	NA	NA	NA	NA	NA	NA	NA	NA	NA	NA	NA	NA
R085	50151268	R085_6	female	37	non-Severe	2020-02-05	2020-03-03	2020-02-02	2020/2/7	3	6	1	Yes	No	No	2	NA	NA	NA	NA	NA	NA	Yes	Yes	Yes	Yes	NA	NA	NA	NA	NA	NA	NA	NA	NA	NA	NA	NA	NA	NA	NA	NA	NA	NA	NA	NA	NA	NA	NA
R085	50151268	R085_7	female	37	non-Severe	2020-02-05	2020-03-03	2020-02-02	2020-02-08	4	7	NA	NA	NA	NA	NA	NA	NA	NA	NA	NA	NA	NA	NA	NA	NA	NA	NA	NA	NA	NA	NA	NA	NA	NA	NA	NA	NA	NA	NA	NA	NA	NA	NA	NA	NA	NA	NA	NA
R085	50151268	R085_8	female	37	non-Severe	2020-02-05	2020-03-03	2020-02-02	2020-02-09	5	8	NA	NA	NA	NA	NA	NA	NA	NA	NA	NA	NA	NA	NA	NA	NA	NA	NA	NA	negative	NA	NA	NA	NA	NA	NA	NA	NA	NA	NA	NA	NA	NA	NA	NA	NA	NA	NA	NA
R086	50151269	R086_10	female	37	non-Severe	2020-02-05	2020-02-13	2020-01-29	2020/2/7	3	10	NA	NA	NA	NA	NA	NA	NA	NA	NA	NA	NA	Yes	NA	Yes	Yes	NA	NA	NA	NA	NA	NA	NA	NA	NA	NA	NA	NA	NA	NA	NA	NA	NA	NA	NA	NA	NA	NA	NA
R086	50151269	R086_13	female	37	non-Severe	2020-02-05	2020-02-13	2020-01-29	2020-02-10	6	13	2	Yes	No	No	3	NA	NA	NA	Yes	NA	NA	NA	NA	NA	NA	NA	NA	NA	negative	58	113	NA	2.32	177	NA	NA	NA	NA	NA	NA	NA	NA	NA	NA	NA	NA	NA	NA
R086	50151269	R086_134	female	37	non-Severe	2020-02-05	2020-02-13	2020-01-29	2020-06-10	127	134	NA	NA	NA	NA	NA	NA	NA	NA	NA	NA	NA	NA	NA	NA	NA	NA	NA	NA	NA	69	97	NA	3.42	261	5.5	1.02	negative	negative	negative	negative	negative	negative	negative	negative	negative	0	2	10
R086	50151269	R086_14	female	37	non-Severe	2020-02-05	2020-02-13	2020-01-29	2020-02-11	7	14	NA	NA	NA	NA	NA	NA	NA	NA	NA	NA	NA	NA	NA	NA	NA	NA	NA	NA	negative	NA	NA	NA	NA	NA	NA	NA	NA	NA	NA	NA	NA	NA	NA	NA	NA	NA	NA	NA
R086	50151269	R086_15	female	37	non-Severe	2020-02-05	2020-02-13	2020-01-29	2020-02-12	8	15	NA	NA	NA	NA	NA	NA	NA	NA	NA	NA	NA	NA	NA	NA	NA	NA	NA	NA	NA	NA	NA	NA	NA	NA	NA	NA	NA	NA	NA	NA	NA	NA	NA	NA	NA	NA	NA	NA
R086	50151269	R086_16	female	37	non-Severe	2020-02-05	2020-02-13	2020-01-29	2020/2/13	9	16	NA	NA	NA	NA	NA	NA	NA	NA	Yes	NA	NA	NA	NA	NA	NA	NA	NA	NA	NA	NA	NA	NA	NA	NA	NA	NA	NA	NA	NA	NA	NA	NA	NA	NA	NA	NA	NA	NA
R086	50151269	R086_32	female	37	non-Severe	2020-02-05	2020-02-13	2020-01-29	2020-02-29	25	32	NA	NA	NA	NA	NA	NA	NA	NA	NA	NA	NA	NA	NA	NA	NA	NA	negative	negative	NA	65	105	NA	2.95	210	7	1.015	negative	negative	negative	negative	negative	negative	negative	negative	negative	0	1	3
R086	50151269	R086_49	female	37	non-Severe	2020-02-05	2020-02-13	2020-01-29	2020-03-17	42	49	NA	NA	NA	NA	NA	NA	NA	NA	NA	NA	NA	NA	NA	NA	NA	NA	NA	negative	NA	68	99	NA	3.79	236	7	1.015	negative	3+	negative	negative	negative	negative	negative	negative	negative	0	1	5
R086	50151269	R086_50	female	37	non-Severe	2020-02-05	2020-02-13	2020-01-29	2020-03-18	43	50	NA	NA	NA	NA	NA	NA	NA	NA	NA	NA	NA	NA	NA	NA	NA	NA	NA	negative	negative	NA	NA	NA	NA	NA	NA	NA	NA	NA	NA	NA	NA	NA	NA	NA	NA	NA	NA	NA
R086	50151269	R086_8	female	37	non-Severe	2020-02-05	2020-02-13	2020-01-29	2020-02-05	1	8	NA	NA	NA	NA	NA	NA	NA	NA	Yes	NA	NA	NA	NA	NA	NA	NA	NA	negative	NA	69	97	27.2	2.77	172	6	1.025	negative	negative	negative	negative	negative	negative	negative	negative	negative	0	7	36
R086	50151269	R086_9	female	37	non-Severe	2020-02-05	2020-02-13	2020-01-29	2020/2/6	2	9	NA	NA	NA	NA	NA	NA	NA	NA	NA	Yes	NA	NA	NA	NA	NA	NA	NA	NA	NA	NA	NA	NA	NA	NA	NA	NA	NA	NA	NA	NA	NA	NA	NA	NA	NA	NA	NA	NA
R087	50151270	R087_10	female	44	non-Severe	2020-02-05	2020-03-02	2020-01-29	2020/2/7	3	10	NA	NA	NA	NA	NA	NA	NA	NA	NA	NA	NA	Yes	NA	Yes	Yes	NA	NA	NA	NA	NA	NA	NA	NA	NA	NA	NA	NA	NA	NA	NA	NA	NA	NA	NA	NA	NA	NA	NA
R087	50151270	R087_13	female	44	non-Severe	2020-02-05	2020-03-02	2020-01-29	2020-02-10	6	13	3	Yes	No	No	4	NA	NA	NA	NA	NA	NA	NA	NA	NA	NA	NA	NA	NA	negative	70	91	NA	3.27	240	NA	NA	NA	NA	NA	NA	NA	NA	NA	NA	NA	NA	NA	NA
R087	50151270	R087_134	female	44	non-Severe	2020-02-05	2020-03-02	2020-01-29	2020-06-10	127	134	NA	NA	NA	NA	NA	NA	NA	NA	NA	NA	NA	NA	NA	NA	NA	NA	negative	NA	NA	75	83	NA	3.53	307	5	1.015	negative	+-	negative	negative	negative	negative	2+	negative	negative	0	13	69
R087	50151270	R087_14	female	44	non-Severe	2020-02-05	2020-03-02	2020-01-29	2020-02-11	7	14	NA	NA	NA	NA	NA	NA	NA	NA	NA	NA	NA	NA	NA	NA	NA	NA	NA	NA	negative	NA	NA	NA	NA	NA	6	1.02	negative	negative	negative	negative	negative	negative	1+	negative	negative	0	11	61
R087	50151270	R087_15	female	44	non-Severe	2020-02-05	2020-03-02	2020-01-29	2020-02-12	8	15	NA	NA	NA	NA	NA	NA	NA	NA	NA	NA	NA	NA	NA	NA	NA	NA	NA	NA	NA	NA	NA	NA	NA	NA	NA	NA	NA	NA	NA	NA	NA	NA	NA	NA	NA	NA	NA	NA
R087	50151270	R087_18	female	44	non-Severe	2020-02-05	2020-03-02	2020-01-29	2020-02-15	11	18	NA	NA	NA	NA	NA	NA	NA	NA	NA	NA	NA	NA	NA	NA	NA	NA	NA	NA	NA	75	84	29.2	2.95	176	NA	NA	NA	NA	NA	NA	NA	NA	NA	NA	NA	NA	NA	NA
R087	50151270	R087_19	female	44	non-Severe	2020-02-05	2020-03-02	2020-01-29	2020-02-16	12	19	NA	NA	NA	NA	NA	NA	NA	NA	NA	NA	NA	NA	NA	NA	NA	NA	NA	negative	positive	NA	NA	NA	NA	NA	NA	NA	NA	NA	NA	NA	NA	NA	NA	NA	NA	NA	NA	NA
R087	50151270	R087_22	female	44	non-Severe	2020-02-05	2020-03-02	2020-01-29	2020-02-19	15	22	4	Yes	No	No	5	NA	NA	NA	NA	NA	NA	NA	NA	NA	NA	NA	NA	NA	negative	76	82	37	3.28	156	NA	NA	NA	NA	NA	NA	NA	NA	NA	NA	NA	NA	NA	NA
R087	50151270	R087_24	female	44	non-Severe	2020-02-05	2020-03-02	2020-01-29	2020-02-21	17	24	NA	NA	NA	NA	NA	NA	NA	NA	NA	NA	NA	NA	NA	NA	NA	NA	negative	NA	NA	NA	NA	NA	NA	NA	NA	NA	NA	NA	NA	NA	NA	NA	NA	NA	NA	NA	NA	NA
R087	50151270	R087_255	female	44	non-Severe	2020-02-05	2020-03-02	2020-01-29	2020-10-09	248	255	NA	NA	NA	NA	NA	NA	NA	NA	NA	NA	NA	NA	NA	NA	NA	NA	NA	NA	negative	NA	NA	NA	NA	NA	NA	NA	NA	NA	NA	NA	NA	NA	NA	NA	NA	NA	NA	NA
R087	50151270	R087_26	female	44	non-Severe	2020-02-05	2020-03-02	2020-01-29	2020-02-23	19	26	NA	NA	NA	NA	NA	NA	NA	NA	NA	NA	NA	NA	NA	NA	NA	NA	negative	negative	NA	NA	NA	NA	NA	NA	NA	NA	NA	NA	NA	NA	NA	NA	NA	NA	NA	NA	NA	NA
R087	50151270	R087_28	female	44	non-Severe	2020-02-05	2020-03-02	2020-01-29	2020-02-25	21	28	NA	NA	NA	NA	NA	NA	NA	NA	NA	NA	NA	NA	NA	NA	NA	NA	negative	positive	NA	NA	NA	NA	NA	NA	NA	NA	NA	NA	NA	NA	NA	NA	NA	NA	NA	NA	NA	NA
R087	50151270	R087_29	female	44	non-Severe	2020-02-05	2020-03-02	2020-01-29	2020/2/26	22	29	0	No	No	No	0	NA	NA	NA	NA	NA	NA	NA	NA	NA	NA	NA	NA	NA	NA	NA	NA	NA	NA	NA	NA	NA	NA	NA	NA	NA	NA	NA	NA	NA	NA	NA	NA	NA
R087	50151270	R087_30	female	44	non-Severe	2020-02-05	2020-03-02	2020-01-29	2020-02-27	23	30	NA	NA	NA	NA	NA	NA	NA	NA	NA	NA	NA	NA	NA	NA	NA	NA	NA	negative	NA	NA	NA	NA	NA	NA	NA	NA	NA	NA	NA	NA	NA	NA	NA	NA	NA	NA	NA	NA
R087	50151270	R087_31	female	44	non-Severe	2020-02-05	2020-03-02	2020-01-29	2020-02-28	24	31	NA	NA	NA	NA	NA	NA	NA	NA	NA	NA	NA	NA	NA	NA	NA	NA	NA	negative	NA	NA	NA	NA	NA	NA	NA	NA	NA	NA	NA	NA	NA	NA	NA	NA	NA	NA	NA	NA
R087	50151270	R087_32	female	44	non-Severe	2020-02-05	2020-03-02	2020-01-29	2020-02-29	25	32	NA	NA	NA	NA	NA	NA	NA	NA	NA	NA	NA	NA	NA	NA	NA	NA	NA	NA	NA	74	85	49.1	3.87	152	NA	NA	NA	NA	NA	NA	NA	NA	NA	NA	NA	NA	NA	NA
R087	50151270	R087_49	female	44	non-Severe	2020-02-05	2020-03-02	2020-01-29	2020-03-17	42	49	NA	NA	NA	NA	NA	NA	NA	NA	NA	NA	NA	NA	NA	NA	NA	NA	negative	negative	NA	74	85	NA	4.76	287	6	1.02	negative	negative	negative	negative	negative	negative	+-	negative	negative	0	5	28
R087	50151270	R087_65	female	44	non-Severe	2020-02-05	2020-03-02	2020-01-29	2020-04-02	58	65	NA	NA	NA	NA	NA	NA	NA	NA	NA	NA	NA	NA	NA	NA	NA	NA	NA	negative	NA	68	NA	44.8	3.42	279	6	1.02	negative	+-	negative	negative	negative	negative	2+	negative	negative	0	63	346
R087	50151270	R087_66	female	44	non-Severe	2020-02-05	2020-03-02	2020-01-29	2020-04-03	59	66	NA	NA	NA	NA	NA	NA	NA	NA	NA	NA	NA	NA	NA	NA	NA	NA	NA	negative	NA	NA	NA	NA	NA	NA	NA	NA	NA	NA	NA	NA	NA	NA	NA	NA	NA	NA	NA	NA
R087	50151270	R087_8	female	44	non-Severe	2020-02-05	2020-03-02	2020-01-29	2020-02-05	1	8	NA	NA	NA	NA	NA	NA	NA	NA	NA	NA	NA	NA	NA	NA	NA	NA	NA	positive	NA	66	98	35.3	3.44	229	6	1.025	negative	negative	+-	negative	negative	negative	1+	1+	negative	0	23	126
R087	50151270	R087_9	female	44	non-Severe	2020-02-05	2020-03-02	2020-01-29	2020/2/6	2	9	NA	NA	NA	NA	NA	NA	NA	NA	NA	Yes	NA	NA	NA	NA	NA	NA	NA	NA	NA	NA	NA	NA	NA	NA	NA	NA	NA	NA	NA	NA	NA	NA	NA	NA	NA	NA	NA	NA
R088	50151271	R088_10	male	12	non-Severe	2020-02-05	2020-02-12	2020-02-01	2020-02-10	6	10	2	Yes	No	No	3	NA	NA	NA	NA	NA	NA	NA	NA	NA	NA	NA	NA	NA	negative	64	142	NA	5.62	601	NA	NA	NA	NA	NA	NA	NA	NA	NA	NA	NA	NA	NA	NA
R088	50151271	R088_11	male	12	non-Severe	2020-02-05	2020-02-12	2020-02-01	2020-02-11	7	11	NA	NA	NA	NA	NA	NA	NA	NA	NA	NA	NA	NA	NA	NA	NA	NA	NA	NA	NA	NA	NA	NA	NA	NA	NA	NA	NA	NA	NA	NA	NA	NA	NA	NA	NA	NA	NA	NA
R088	50151271	R088_20	male	12	non-Severe	2020-02-05	2020-02-12	2020-02-01	2020-02-20	16	20	NA	NA	NA	NA	NA	NA	NA	NA	NA	NA	NA	NA	NA	NA	NA	NA	negative	NA	NA	NA	NA	NA	NA	NA	NA	NA	NA	NA	NA	NA	NA	NA	NA	NA	NA	NA	NA	NA
R088	50151271	R088_26	male	12	non-Severe	2020-02-05	2020-02-12	2020-02-01	2020-02-26	22	26	NA	NA	NA	NA	NA	NA	NA	NA	NA	NA	NA	NA	NA	NA	NA	NA	negative	negative	NA	60	144	NA	6.73	414	5.5	1.03	negative	+-	+-	negative	negative	negative	negative	negative	negative	NA	1	5
R088	50151271	R088_27	male	12	non-Severe	2020-02-05	2020-02-12	2020-02-01	2020-02-27	23	27	NA	NA	NA	NA	NA	NA	NA	NA	NA	NA	NA	NA	NA	NA	NA	NA	NA	NA	NA	NA	NA	NA	NA	NA	NA	NA	NA	NA	NA	NA	NA	NA	NA	NA	NA	NA	NA	NA
R088	50151271	R088_386	male	12	non-Severe	2020-02-05	2020-02-12	2020-02-01	2021-02-20	382	386	0	No	No	No	0	NA	NA	NA	NA	NA	NA	NA	NA	NA	NA	NA	negative	NA	NA	52	153	42.8	4.83	405	6	1.025	NA	negative	NA	negative	negative	negative	negative	negative	negative	NA	NA	0
R088	50151271	R088_4	male	12	non-Severe	2020-02-05	2020-02-12	2020-02-01	2020-02-04	0	4	NA	NA	NA	NA	NA	NA	NA	NA	NA	NA	NA	NA	NA	NA	NA	NA	positive	NA	positive	NA	NA	NA	NA	NA	NA	NA	NA	NA	NA	NA	NA	NA	NA	NA	NA	NA	NA	NA
R088	50151271	R088_5	male	12	non-Severe	2020-02-05	2020-02-12	2020-02-01	2020-02-05	1	5	NA	NA	NA	NA	NA	NA	NA	NA	NA	NA	NA	NA	NA	NA	NA	NA	NA	NA	NA	69	105	35.1	5.47	516	NA	NA	NA	NA	NA	NA	NA	NA	NA	NA	NA	NA	NA	NA
R088	50151271	R088_6	male	12	non-Severe	2020-02-05	2020-02-12	2020-02-01	2020/2/6	2	6	3	Yes	No	No	4	NA	NA	NA	NA	NA	NA	NA	NA	NA	NA	NA	NA	NA	NA	NA	NA	NA	NA	NA	NA	NA	NA	NA	NA	NA	NA	NA	NA	NA	NA	NA	NA	NA
R088	50151271	R088_9	male	12	non-Severe	2020-02-05	2020-02-12	2020-02-01	2020-02-09	5	9	NA	NA	NA	NA	NA	NA	NA	NA	NA	NA	NA	NA	NA	NA	NA	NA	NA	NA	negative	NA	NA	NA	NA	NA	NA	NA	NA	NA	NA	NA	NA	NA	NA	NA	NA	NA	NA	NA
R089	50151275	R089_10	male	66	non-Severe	2020-02-05	2020-02-23	2020-02-02	2020-02-11	7	10	3	Yes	Yes	Yes	9	NA	NA	NA	NA	NA	NA	NA	NA	NA	NA	NA	NA	NA	NA	NA	NA	NA	NA	NA	NA	NA	NA	NA	NA	NA	NA	NA	NA	NA	NA	NA	NA	NA
R089	50151275	R089_11	male	66	non-Severe	2020-02-05	2020-02-23	2020-02-02	2020-02-12	8	11	NA	NA	NA	NA	NA	NA	NA	NA	NA	NA	NA	NA	NA	NA	NA	NA	NA	NA	NA	NA	NA	NA	NA	NA	NA	NA	NA	NA	NA	NA	NA	NA	NA	NA	NA	NA	NA	NA
R089	50151275	R089_12	male	66	non-Severe	2020-02-05	2020-02-23	2020-02-02	2020-02-13	9	12	NA	NA	NA	NA	NA	NA	NA	NA	NA	NA	NA	NA	NA	NA	NA	NA	NA	NA	NA	90	76	29.9	3.12	362	NA	NA	NA	NA	NA	NA	NA	NA	NA	NA	NA	NA	NA	NA
R089	50151275	R089_13	male	66	non-Severe	2020-02-05	2020-02-23	2020-02-02	2020-02-14	10	13	NA	NA	NA	NA	NA	NA	NA	NA	NA	NA	NA	NA	NA	NA	NA	NA	NA	NA	negative	NA	NA	NA	NA	NA	NA	NA	NA	NA	NA	NA	NA	NA	NA	NA	NA	NA	NA	NA
R089	50151275	R089_16	male	66	non-Severe	2020-02-05	2020-02-23	2020-02-02	2020-02-17	13	16	NA	NA	NA	NA	NA	NA	NA	NA	NA	NA	NA	NA	NA	NA	NA	NA	NA	NA	negative	NA	NA	NA	NA	NA	NA	NA	NA	NA	NA	NA	NA	NA	NA	NA	NA	NA	NA	NA
R089	50151275	R089_18	male	66	non-Severe	2020-02-05	2020-02-23	2020-02-02	2020-02-19	15	18	NA	NA	NA	NA	NA	NA	NA	NA	NA	NA	NA	NA	NA	NA	NA	NA	negative	negative	negative	NA	NA	NA	NA	NA	NA	NA	NA	NA	NA	NA	NA	NA	NA	NA	NA	NA	NA	NA
R089	50151275	R089_19	male	66	non-Severe	2020-02-05	2020-02-23	2020-02-02	2020-02-20	16	19	NA	NA	NA	NA	NA	NA	NA	NA	NA	NA	NA	NA	NA	NA	NA	NA	NA	NA	NA	90	76	NA	4.2	378	NA	NA	NA	NA	NA	NA	NA	NA	NA	NA	NA	NA	NA	NA
R089	50151275	R089_20	male	66	non-Severe	2020-02-05	2020-02-23	2020-02-02	2020/2/21	17	20	2	Yes	No	Yes	6	NA	NA	NA	NA	NA	NA	NA	NA	NA	NA	NA	NA	NA	NA	NA	NA	NA	NA	NA	NA	NA	NA	NA	NA	NA	NA	NA	NA	NA	NA	NA	NA	NA
R089	50151275	R089_21	male	66	non-Severe	2020-02-05	2020-02-23	2020-02-02	2020-02-22	18	21	NA	NA	NA	NA	NA	NA	NA	NA	NA	NA	NA	NA	NA	NA	NA	NA	NA	NA	NA	NA	NA	NA	NA	NA	NA	NA	NA	NA	NA	NA	NA	NA	NA	NA	NA	NA	NA	NA
R089	50151275	R089_22	male	66	non-Severe	2020-02-05	2020-02-23	2020-02-02	2020-02-23	19	22	NA	NA	NA	NA	NA	NA	NA	NA	NA	Yes	NA	Yes	NA	Yes	Yes	NA	NA	NA	NA	NA	NA	NA	NA	NA	NA	NA	NA	NA	NA	NA	NA	NA	NA	NA	NA	NA	NA	NA
R089	50151275	R089_36	male	66	non-Severe	2020-02-05	2020-02-23	2020-02-02	2020-03-08	33	36	NA	NA	NA	NA	NA	NA	NA	NA	NA	NA	NA	NA	NA	NA	NA	NA	NA	NA	negative	83	84	44	3.8	383	7.5	1.015	negative	+-	negative	negative	negative	negative	negative	negative	negative	0	0	2
R089	50151275	R089_4	male	66	non-Severe	2020-02-05	2020-02-23	2020-02-02	2020-02-05	1	4	NA	NA	NA	NA	NA	NA	NA	NA	NA	NA	NA	NA	NA	NA	NA	NA	NA	negative	NA	82	86	32.2	6.24	319	5.5	1.03	negative	3+	+-	2+	negative	negative	negative	negative	negative	0	1	5
R089	50151275	R089_6	male	66	non-Severe	2020-02-05	2020-02-23	2020-02-02	2020-02-07	3	6	2	Yes	Yes	Yes	8	NA	NA	NA	NA	NA	NA	NA	NA	NA	NA	NA	NA	NA	NA	NA	NA	NA	NA	NA	5	1.025	negative	+-	negative	+-	negative	negative	negative	negative	negative	0	5	25
R089	50151275	R089_7	male	66	non-Severe	2020-02-05	2020-02-23	2020-02-02	2020-02-08	4	7	NA	NA	NA	NA	NA	NA	NA	NA	NA	NA	NA	NA	NA	NA	NA	NA	NA	NA	NA	NA	NA	NA	NA	NA	NA	NA	NA	NA	NA	NA	NA	NA	NA	NA	NA	NA	NA	NA
R090	50151283	R090_10	male	53	non-Severe	2020-02-05	2020-03-04	2020-02-03	2020-02-12	8	10	NA	NA	NA	NA	NA	NA	NA	NA	NA	NA	NA	NA	NA	NA	NA	NA	NA	NA	NA	92	82	NA	3.79	351	NA	NA	NA	NA	NA	NA	NA	NA	NA	NA	NA	NA	NA	NA
R090	50151283	R090_11	male	53	non-Severe	2020-02-05	2020-03-04	2020-02-03	2020-02-13	9	11	3	Yes	No	Yes	7	NA	NA	NA	NA	NA	NA	NA	NA	NA	NA	NA	NA	NA	NA	NA	NA	NA	NA	NA	NA	NA	NA	NA	NA	NA	NA	NA	NA	NA	NA	NA	NA	NA
R090	50151283	R090_12	male	53	non-Severe	2020-02-05	2020-03-04	2020-02-03	2020-02-14	10	12	NA	NA	NA	NA	NA	NA	NA	NA	NA	NA	NA	NA	NA	NA	NA	NA	NA	NA	NA	NA	NA	NA	NA	NA	NA	NA	NA	NA	NA	NA	NA	NA	NA	NA	NA	NA	NA	NA
R090	50151283	R090_124	male	53	non-Severe	2020-02-05	2020-03-04	2020-02-03	2020-06-05	122	124	NA	NA	NA	NA	NA	NA	NA	NA	NA	NA	NA	NA	NA	NA	NA	NA	NA	NA	NA	95	78	NA	4.66	376	5.5	1.025	negative	negative	negative	negative	negative	negative	negative	negative	negative	0	1	5
R090	50151283	R090_13	male	53	non-Severe	2020-02-05	2020-03-04	2020-02-03	2020-02-15	11	13	NA	NA	NA	NA	NA	NA	NA	NA	NA	NA	NA	NA	NA	NA	NA	NA	NA	NA	NA	NA	NA	NA	NA	NA	NA	NA	NA	NA	NA	NA	NA	NA	NA	NA	NA	NA	NA	NA
R090	50151283	R090_15	male	53	non-Severe	2020-02-05	2020-03-04	2020-02-03	2020-02-17	13	15	NA	NA	NA	NA	NA	NA	NA	NA	NA	NA	NA	NA	NA	NA	NA	NA	NA	NA	negative	NA	NA	NA	NA	NA	NA	NA	NA	NA	NA	NA	NA	NA	NA	NA	NA	NA	NA	NA
R090	50151283	R090_16	male	53	non-Severe	2020-02-05	2020-03-04	2020-02-03	2020-02-18	14	16	NA	NA	NA	NA	NA	NA	NA	NA	NA	NA	NA	NA	NA	NA	NA	NA	NA	NA	NA	98	76	43.4	4.41	382	NA	NA	NA	NA	NA	NA	NA	NA	NA	NA	NA	NA	NA	NA
R090	50151283	R090_18	male	53	non-Severe	2020-02-05	2020-03-04	2020-02-03	2020-02-20	16	18	NA	NA	NA	NA	NA	NA	NA	NA	NA	NA	NA	NA	NA	NA	NA	NA	NA	NA	negative	NA	NA	NA	NA	NA	NA	NA	NA	NA	NA	NA	NA	NA	NA	NA	NA	NA	NA	NA
R090	50151283	R090_19	male	53	non-Severe	2020-02-05	2020-03-04	2020-02-03	2020-02-21	17	19	NA	NA	NA	NA	NA	NA	NA	NA	NA	NA	NA	NA	NA	NA	NA	NA	negative	positive	NA	NA	NA	NA	NA	NA	NA	NA	NA	NA	NA	NA	NA	NA	NA	NA	NA	NA	NA	NA
R090	50151283	R090_21	male	53	non-Severe	2020-02-05	2020-03-04	2020-02-03	2020-02-23	19	21	NA	NA	NA	NA	NA	NA	NA	NA	NA	NA	NA	NA	NA	NA	NA	NA	NA	NA	NA	NA	NA	NA	NA	NA	NA	NA	NA	NA	NA	NA	NA	NA	NA	NA	NA	NA	NA	NA
R090	50151283	R090_22	male	53	non-Severe	2020-02-05	2020-03-04	2020-02-03	2020-02-24	20	22	NA	NA	NA	NA	NA	NA	NA	NA	NA	NA	NA	NA	NA	NA	NA	NA	negative	positive	NA	NA	NA	NA	NA	NA	NA	NA	NA	NA	NA	NA	NA	NA	NA	NA	NA	NA	NA	NA
R090	50151283	R090_25	male	53	non-Severe	2020-02-05	2020-03-04	2020-02-03	2020-02-27	23	25	NA	NA	NA	NA	NA	NA	NA	NA	NA	NA	NA	NA	NA	NA	NA	NA	negative	negative	NA	NA	NA	NA	NA	NA	NA	NA	NA	NA	NA	NA	NA	NA	NA	NA	NA	NA	NA	NA
R090	50151283	R090_26	male	53	non-Severe	2020-02-05	2020-03-04	2020-02-03	2020-02-28	24	26	NA	NA	NA	NA	NA	NA	NA	NA	NA	NA	NA	NA	NA	NA	NA	NA	NA	NA	NA	97	76	36.3	4.54	351	NA	NA	NA	NA	NA	NA	NA	NA	NA	NA	NA	NA	NA	NA
R090	50151283	R090_28	male	53	non-Severe	2020-02-05	2020-03-04	2020-02-03	2020-03-01	26	28	NA	NA	NA	NA	NA	NA	NA	NA	NA	NA	NA	NA	NA	NA	NA	NA	NA	positive	NA	NA	NA	NA	NA	NA	NA	NA	NA	NA	NA	NA	NA	NA	NA	NA	NA	NA	NA	NA
R090	50151283	R090_29	male	53	non-Severe	2020-02-05	2020-03-04	2020-02-03	2020/3/2	27	29	1	Yes	No	No	2	NA	NA	NA	NA	NA	NA	NA	NA	NA	NA	NA	NA	NA	NA	NA	NA	NA	NA	NA	NA	NA	NA	NA	NA	NA	NA	NA	NA	NA	NA	NA	NA	NA
R090	50151283	R090_3	male	53	non-Severe	2020-02-05	2020-03-04	2020-02-03	2020-02-05	1	3	NA	NA	NA	NA	NA	NA	NA	NA	NA	NA	NA	NA	NA	NA	NA	NA	NA	positive	NA	91	83	55.1	7.01	397	5	1.03	negative	negative	negative	negative	negative	negative	negative	negative	negative	0	2	10
R090	50151283	R090_30	male	53	non-Severe	2020-02-05	2020-03-04	2020-02-03	2020-03-03	28	30	NA	NA	NA	NA	NA	NA	NA	NA	NA	NA	NA	NA	NA	NA	NA	NA	NA	NA	NA	NA	NA	NA	NA	NA	NA	NA	NA	NA	NA	NA	NA	NA	NA	NA	NA	NA	NA	NA
R090	50151283	R090_4	male	53	non-Severe	2020-02-05	2020-03-04	2020-02-03	2020/2/6	2	4	NA	NA	NA	NA	NA	NA	NA	NA	NA	Yes	NA	NA	NA	NA	NA	NA	NA	NA	NA	NA	NA	NA	NA	NA	NA	NA	NA	NA	NA	NA	NA	NA	NA	NA	NA	NA	NA	NA
R090	50151283	R090_47	male	53	non-Severe	2020-02-05	2020-03-04	2020-02-03	2020-03-20	45	47	NA	NA	NA	NA	NA	NA	NA	NA	NA	NA	NA	NA	NA	NA	NA	NA	negative	negative	NA	105	69	NA	5.13	360	5.5	1.025	negative	negative	negative	negative	negative	negative	negative	negative	negative	0	2	11
R090	50151283	R090_5	male	53	non-Severe	2020-02-05	2020-03-04	2020-02-03	2020/2/7	3	5	NA	NA	NA	NA	NA	NA	NA	NA	NA	NA	NA	Yes	NA	Yes	Yes	NA	NA	NA	NA	NA	NA	NA	NA	NA	NA	NA	NA	NA	NA	NA	NA	NA	NA	NA	NA	NA	NA	NA
R090	50151283	R090_59	male	53	non-Severe	2020-02-05	2020-03-04	2020-02-03	2020-04-01	57	59	NA	NA	NA	NA	NA	NA	NA	NA	NA	NA	NA	NA	NA	NA	NA	NA	NA	negative	NA	96	77	NA	4.53	377	5	1.03	negative	negative	negative	negative	negative	negative	negative	negative	negative	0	1	4
R090	50151283	R090_6	male	53	non-Severe	2020-02-05	2020-03-04	2020-02-03	2020/2/8	4	6	1	Yes	No	No	2	NA	NA	NA	NA	NA	NA	NA	NA	NA	NA	NA	NA	NA	NA	NA	NA	NA	NA	NA	NA	NA	NA	NA	NA	NA	NA	NA	NA	NA	NA	NA	NA	NA
R090	50151283	R090_60	male	53	non-Severe	2020-02-05	2020-03-04	2020-02-03	2020-04-02	58	60	NA	NA	NA	NA	NA	NA	NA	NA	NA	NA	NA	NA	NA	NA	NA	NA	negative	negative	NA	NA	NA	NA	NA	NA	NA	NA	NA	NA	NA	NA	NA	NA	NA	NA	NA	NA	NA	NA
R090	50151283	R090_8	male	53	non-Severe	2020-02-05	2020-03-04	2020-02-03	2020-02-10	6	8	NA	NA	NA	NA	NA	NA	NA	NA	NA	NA	NA	NA	NA	NA	NA	NA	NA	NA	positive	NA	NA	NA	NA	NA	NA	NA	NA	NA	NA	NA	NA	NA	NA	NA	NA	NA	NA	NA
R091	50151302	R091_10	female	53	non-Severe	2020-02-06	2020-02-26	2020-02-01	2020-02-10	5	10	4	Yes	Yes	No	7	NA	NA	NA	Yes	NA	NA	NA	NA	NA	NA	NA	NA	NA	NA	NA	NA	NA	NA	NA	NA	NA	NA	NA	NA	NA	NA	NA	NA	NA	NA	NA	NA	NA
R091	50151302	R091_102	female	53	non-Severe	2020-02-06	2020-02-26	2020-02-01	2020-05-12	97	102	NA	NA	NA	NA	NA	NA	NA	NA	NA	NA	NA	NA	NA	NA	NA	NA	NA	NA	NA	64	95	35.4	4.21	332	NA	NA	NA	NA	NA	NA	NA	NA	NA	NA	NA	NA	NA	NA
R091	50151302	R091_129	female	53	non-Severe	2020-02-06	2020-02-26	2020-02-01	2020-06-08	124	129	NA	NA	NA	NA	NA	NA	NA	NA	NA	NA	NA	NA	NA	NA	NA	NA	NA	NA	NA	66	92	NA	3.6	332	5	1.02	negative	1+	negative	negative	negative	negative	2+	negative	negative	0	16	90
R091	50151302	R091_14	female	53	non-Severe	2020-02-06	2020-02-26	2020-02-01	2020-02-14	9	14	5	Yes	Yes	Yes	11	NA	NA	NA	NA	NA	NA	NA	NA	NA	NA	NA	NA	NA	NA	NA	NA	NA	NA	NA	NA	NA	NA	NA	NA	NA	NA	NA	NA	NA	NA	NA	NA	NA
R091	50151302	R091_15	female	53	non-Severe	2020-02-06	2020-02-26	2020-02-01	2020-02-15	10	15	NA	NA	NA	NA	NA	NA	NA	NA	Yes	NA	NA	NA	NA	NA	NA	NA	NA	NA	NA	65	94	36.2	3.47	230	NA	NA	NA	NA	NA	NA	NA	NA	NA	NA	NA	NA	NA	NA
R091	50151302	R091_16	female	53	non-Severe	2020-02-06	2020-02-26	2020-02-01	2020-02-16	11	16	NA	NA	NA	NA	NA	NA	NA	NA	NA	NA	NA	NA	NA	NA	NA	NA	NA	NA	negative	NA	NA	NA	NA	NA	NA	NA	NA	NA	NA	NA	NA	NA	NA	NA	NA	NA	NA	NA
R091	50151302	R091_19	female	53	non-Severe	2020-02-06	2020-02-26	2020-02-01	2020-02-19	14	19	NA	NA	NA	NA	NA	NA	NA	NA	Yes	NA	NA	NA	NA	NA	NA	NA	negative	NA	negative	NA	NA	NA	NA	NA	NA	NA	NA	NA	NA	NA	NA	NA	NA	NA	NA	NA	NA	NA
R091	50151302	R091_20	female	53	non-Severe	2020-02-06	2020-02-26	2020-02-01	2020-02-20	15	20	NA	NA	NA	NA	NA	NA	NA	NA	Yes	NA	NA	NA	NA	NA	NA	NA	NA	NA	NA	68	89	39.7	4.28	296	NA	NA	NA	NA	NA	NA	NA	NA	NA	NA	NA	NA	NA	NA
R091	50151302	R091_21	female	53	non-Severe	2020-02-06	2020-02-26	2020-02-01	2020-02-21	16	21	NA	NA	NA	NA	NA	NA	NA	NA	NA	NA	NA	NA	NA	NA	NA	NA	negative	negative	NA	NA	NA	NA	NA	NA	NA	NA	NA	NA	NA	NA	NA	NA	NA	NA	NA	NA	NA	NA
R091	50151302	R091_23	female	53	non-Severe	2020-02-06	2020-02-26	2020-02-01	2020/2/23	18	23	3	Yes	No	No	4	NA	NA	NA	NA	NA	NA	NA	NA	NA	NA	NA	NA	NA	NA	NA	NA	NA	NA	NA	NA	NA	NA	NA	NA	NA	NA	NA	NA	NA	NA	NA	NA	NA
R091	50151302	R091_24	female	53	non-Severe	2020-02-06	2020-02-26	2020-02-01	2020-02-24	19	24	NA	NA	NA	NA	NA	NA	NA	NA	Yes	NA	NA	NA	NA	NA	NA	NA	negative	negative	NA	67	90	NA	3.94	298	NA	NA	NA	NA	NA	NA	NA	NA	NA	NA	NA	NA	NA	NA
R091	50151302	R091_240	female	53	non-Severe	2020-02-06	2020-02-26	2020-02-01	2020-09-27	235	240	NA	NA	NA	NA	NA	NA	NA	NA	NA	NA	NA	NA	NA	NA	NA	NA	NA	NA	negative	63	97	40.3	3.85	336	NA	NA	NA	NA	NA	NA	NA	NA	NA	NA	NA	NA	NA	NA
R091	50151302	R091_25	female	53	non-Severe	2020-02-06	2020-02-26	2020-02-01	2020-02-25	20	25	NA	NA	NA	NA	NA	NA	NA	NA	Yes	NA	NA	NA	NA	NA	NA	NA	NA	NA	NA	NA	NA	NA	NA	NA	NA	NA	NA	NA	NA	NA	NA	NA	NA	NA	NA	NA	NA	NA
R091	50151302	R091_40	female	53	non-Severe	2020-02-06	2020-02-26	2020-02-01	2020-03-11	35	40	NA	NA	NA	NA	NA	NA	NA	NA	NA	NA	NA	NA	NA	NA	NA	NA	negative	negative	NA	68	104	NA	4.53	318	5	1.025	negative	2+	negative	negative	negative	negative	1+	negative	negative	NA	25	125
R091	50151302	R091_487	female	53	non-Severe	2020-02-06	2020-02-26	2020-02-01	2021-06-01	482	487	1	Yes	No	No	2	NA	NA	NA	NA	NA	NA	NA	NA	NA	NA	NA	NA	NA	NA	NA	NA	NA	NA	NA	NA	NA	NA	NA	NA	NA	NA	NA	NA	NA	NA	NA	NA	NA
R091	50151302	R091_54	female	53	non-Severe	2020-02-06	2020-02-26	2020-02-01	2020-03-25	49	54	NA	NA	NA	NA	NA	NA	NA	NA	NA	NA	NA	NA	NA	NA	NA	NA	negative	negative	NA	69	103	NA	3.81	353	5	1.025	negative	3+	negative	negative	negative	negative	negative	negative	negative	0	5	26
R091	50151302	R091_55	female	53	non-Severe	2020-02-06	2020-02-26	2020-02-01	2020-03-26	50	55	NA	NA	NA	NA	NA	NA	NA	NA	NA	NA	NA	NA	NA	NA	NA	NA	NA	NA	NA	NA	NA	NA	NA	NA	NA	NA	NA	NA	NA	NA	NA	NA	NA	NA	NA	NA	NA	NA
R091	50151302	R091_6	female	53	non-Severe	2020-02-06	2020-02-26	2020-02-01	2020-02-06	1	6	NA	NA	NA	NA	NA	NA	NA	NA	Yes	NA	NA	NA	NA	NA	NA	NA	NA	NA	NA	72	83	30	5.56	237	6.5	1.02	negative	negative	negative	+-	negative	negative	negative	negative	negative	0	8	44
R091	50151302	R091_61	female	53	non-Severe	2020-02-06	2020-02-26	2020-02-01	2020-04-01	56	61	NA	NA	NA	NA	NA	NA	NA	NA	NA	NA	NA	NA	NA	NA	NA	NA	NA	NA	NA	NA	NA	NA	NA	NA	NA	NA	NA	NA	NA	NA	NA	NA	NA	NA	NA	NA	NA	NA
R091	50151302	R091_7	female	53	non-Severe	2020-02-06	2020-02-26	2020-02-01	2020-02-07	2	7	NA	NA	NA	NA	NA	NA	NA	NA	NA	NA	NA	NA	NA	NA	NA	NA	NA	NA	NA	NA	NA	NA	NA	NA	NA	NA	NA	NA	NA	NA	NA	NA	NA	NA	NA	NA	NA	NA
R091	50151302	R091_740	female	53	non-Severe	2020-02-06	2020-02-26	2020-02-01	2022-02-09	735	740	2	Yes	No	Yes	6	NA	NA	NA	NA	NA	NA	NA	NA	NA	NA	NA	NA	NA	NA	58	99	40.3	6.34	308	5	1.016	negative	negative	negative	negative	negative	negative	negative	negative	negative	0	1	4
R092	50151305	R092_113	female	36	Severe	2020-02-06	2020-02-28	2020-02-03	2020-05-25	110	113	NA	NA	NA	NA	NA	NA	NA	NA	NA	NA	NA	NA	NA	NA	NA	NA	negative	NA	NA	71	95	NA	4.33	384	5.5	1.03	negative	negative	negative	negative	negative	negative	+-	negative	negative	0	5	30
R092	50151305	R092_12	female	36	Severe	2020-02-06	2020-02-28	2020-02-03	2020-02-14	9	12	5	Yes	No	Yes	9	NA	NA	NA	NA	NA	NA	NA	NA	NA	NA	NA	positive	NA	NA	NA	NA	NA	NA	NA	NA	NA	NA	NA	NA	NA	NA	NA	NA	NA	NA	NA	NA	NA
R092	50151305	R092_13	female	36	Severe	2020-02-06	2020-02-28	2020-02-03	2020-02-15	10	13	NA	NA	NA	NA	NA	NA	NA	NA	NA	NA	NA	NA	NA	NA	NA	NA	NA	NA	NA	NA	NA	NA	NA	NA	NA	NA	NA	NA	NA	NA	NA	NA	NA	NA	NA	NA	NA	NA
R092	50151305	R092_14	female	36	Severe	2020-02-06	2020-02-28	2020-02-03	2020-02-16	11	14	NA	NA	NA	NA	NA	NA	NA	NA	NA	NA	NA	NA	NA	NA	NA	NA	NA	negative	negative	NA	NA	NA	NA	NA	NA	NA	NA	NA	NA	NA	NA	NA	NA	NA	NA	NA	NA	NA
R092	50151305	R092_16	female	36	Severe	2020-02-06	2020-02-28	2020-02-03	2020-02-18	13	16	NA	NA	NA	NA	NA	NA	NA	NA	NA	NA	NA	NA	NA	NA	NA	NA	positive	NA	negative	65	105	48.8	5.65	292	NA	NA	NA	NA	NA	NA	NA	NA	NA	NA	NA	NA	NA	NA
R092	50151305	R092_18	female	36	Severe	2020-02-06	2020-02-28	2020-02-03	2020-02-20	15	18	NA	NA	NA	NA	NA	NA	NA	NA	NA	NA	NA	NA	NA	NA	NA	NA	negative	NA	negative	NA	NA	NA	NA	NA	NA	NA	NA	NA	NA	NA	NA	NA	NA	NA	NA	NA	NA	NA
R092	50151305	R092_20	female	36	Severe	2020-02-06	2020-02-28	2020-02-03	2020-02-22	17	20	NA	NA	NA	NA	NA	NA	NA	NA	NA	NA	NA	NA	NA	NA	NA	NA	negative	negative	NA	NA	NA	NA	NA	NA	NA	NA	NA	NA	NA	NA	NA	NA	NA	NA	NA	NA	NA	NA
R092	50151305	R092_22	female	36	Severe	2020-02-06	2020-02-28	2020-02-03	2020-02-24	19	22	NA	NA	NA	NA	NA	NA	NA	NA	NA	NA	NA	NA	NA	NA	NA	NA	negative	negative	NA	NA	NA	NA	NA	NA	NA	NA	NA	NA	NA	NA	NA	NA	NA	NA	NA	NA	NA	NA
R092	50151305	R092_24	female	36	Severe	2020-02-06	2020-02-28	2020-02-03	2020-02-26	21	24	3	Yes	No	No	4	NA	NA	NA	NA	NA	NA	NA	NA	NA	NA	NA	NA	NA	NA	58	114	33.9	2.36	325	NA	NA	NA	NA	NA	NA	NA	NA	NA	NA	NA	NA	NA	NA
R092	50151305	R092_25	female	36	Severe	2020-02-06	2020-02-28	2020-02-03	2020-02-27	22	25	NA	NA	NA	NA	NA	NA	NA	NA	NA	NA	NA	NA	NA	NA	NA	NA	NA	NA	NA	NA	NA	NA	NA	NA	NA	NA	NA	NA	NA	NA	NA	NA	NA	NA	NA	NA	NA	NA
R092	50151305	R092_373	female	36	Severe	2020-02-06	2020-02-28	2020-02-03	2021-02-09	370	373	0	No	No	No	0	NA	NA	NA	NA	NA	NA	NA	Yes	NA	NA	NA	negative	NA	NA	52	118	43.9	4.05	330	5.5	1.029	NA	negative	NA	negative	negative	negative	negative	negative	negative	NA	NA	0
R092	50151305	R092_4	female	36	Severe	2020-02-06	2020-02-28	2020-02-03	2020-02-06	1	4	NA	NA	NA	NA	NA	NA	NA	NA	NA	NA	NA	NA	NA	NA	NA	NA	NA	positive	NA	61	112	21.9	2.46	259	5.5	1.03	negative	negative	negative	negative	negative	negative	+-	negative	negative	0	64	351
R092	50151305	R092_40	female	36	Severe	2020-02-06	2020-02-28	2020-02-03	2020-03-13	37	40	NA	NA	NA	NA	NA	NA	NA	NA	NA	NA	NA	NA	NA	NA	NA	NA	negative	negative	NA	66	103	47	3.12	327	NA	NA	NA	NA	NA	NA	NA	NA	NA	NA	NA	NA	NA	NA
R092	50151305	R092_54	female	36	Severe	2020-02-06	2020-02-28	2020-02-03	2020-03-27	51	54	NA	NA	NA	NA	NA	NA	NA	NA	NA	NA	NA	NA	NA	NA	NA	NA	negative	negative	NA	65	105	NA	4.51	351	5.5	1.03	negative	negative	negative	negative	negative	negative	+-	negative	negative	0	3	15
R092	50151305	R092_6	female	36	Severe	2020-02-06	2020-02-28	2020-02-03	2020-02-08	3	6	5	Yes	Yes	Yes	11	NA	NA	NA	NA	NA	NA	NA	NA	NA	NA	NA	NA	NA	NA	NA	NA	NA	NA	NA	NA	NA	NA	NA	NA	NA	NA	NA	NA	NA	NA	NA	NA	NA
R092	50151305	R092_7	female	36	Severe	2020-02-06	2020-02-28	2020-02-03	2020-02-09	4	7	NA	NA	NA	NA	NA	NA	NA	NA	NA	NA	NA	NA	NA	NA	NA	NA	NA	NA	NA	NA	NA	NA	NA	NA	NA	NA	NA	NA	NA	NA	NA	NA	NA	NA	NA	NA	NA	NA
R092	50151305	R092_738	female	36	Severe	2020-02-06	2020-02-28	2020-02-03	2022-02-09	735	738	0	No	No	No	0	NA	NA	NA	NA	NA	NA	NA	NA	NA	NA	NA	NA	NA	NA	62	109	40.4	3.64	431	5	1.012	negative	negative	negative	negative	negative	negative	negative	negative	negative	0	1	3
R092	50151305	R092_8	female	36	Severe	2020-02-06	2020-02-28	2020-02-03	2020-02-10	5	8	NA	NA	NA	NA	NA	NA	NA	NA	NA	NA	NA	NA	NA	NA	NA	NA	NA	NA	NA	NA	NA	NA	NA	NA	NA	NA	NA	NA	NA	NA	NA	NA	NA	NA	NA	NA	NA	NA
R092	50151305	R092_9	female	36	Severe	2020-02-06	2020-02-28	2020-02-03	2020-02-11	6	9	NA	NA	NA	NA	NA	NA	NA	NA	NA	NA	NA	NA	Yes	NA	NA	NA	NA	NA	NA	66	103	28.4	5.34	297	NA	NA	NA	NA	NA	NA	NA	NA	NA	NA	NA	NA	NA	NA
R093	50151307	R093_10	female	68	Severe	2020-02-06	2020-03-10	2020-01-30	2020-02-08	3	10	NA	NA	NA	NA	NA	NA	NA	Yes	Yes	NA	NA	NA	NA	NA	NA	NA	NA	NA	NA	61	90	29.3	6.17	150	NA	NA	NA	NA	NA	NA	NA	NA	NA	NA	NA	NA	NA	NA
R093	50151307	R093_11	female	68	Severe	2020-02-06	2020-03-10	2020-01-30	2020-02-09	4	11	NA	NA	NA	NA	NA	NA	NA	NA	NA	NA	NA	NA	NA	NA	NA	NA	NA	NA	positive	NA	NA	NA	NA	NA	NA	NA	NA	NA	NA	NA	NA	NA	NA	NA	NA	NA	NA	NA
R093	50151307	R093_12	female	68	Severe	2020-02-06	2020-03-10	2020-01-30	2020-02-10	5	12	NA	NA	NA	NA	NA	NA	NA	NA	NA	NA	NA	NA	NA	NA	NA	NA	NA	NA	NA	NA	NA	NA	NA	NA	NA	NA	NA	NA	NA	NA	NA	NA	NA	NA	NA	NA	NA	NA
R093	50151307	R093_13	female	68	Severe	2020-02-06	2020-03-10	2020-01-30	2020-02-11	6	13	5	Yes	Yes	No	8	NA	NA	NA	Yes	NA	NA	NA	NA	NA	NA	NA	NA	NA	NA	57	92	37.9	8.13	95	NA	NA	NA	NA	NA	NA	NA	NA	NA	NA	NA	NA	NA	NA
R093	50151307	R093_14	female	68	Severe	2020-02-06	2020-03-10	2020-01-30	2020-02-12	7	14	NA	NA	NA	NA	NA	NA	NA	Yes	Yes	NA	NA	NA	NA	NA	NA	NA	NA	NA	NA	62	89	37	6.46	74	NA	NA	NA	NA	NA	NA	NA	NA	NA	NA	NA	NA	NA	NA
R093	50151307	R093_145	female	68	Severe	2020-02-06	2020-03-10	2020-01-30	2020-06-22	138	145	NA	NA	NA	NA	NA	NA	NA	NA	NA	NA	NA	NA	NA	NA	NA	NA	NA	NA	NA	59	91	NA	4.34	253	7.5	1.015	negative	+-	negative	negative	negative	negative	negative	negative	negative	0	3	14
R093	50151307	R093_15	female	68	Severe	2020-02-06	2020-03-10	2020-01-30	2020-02-13	8	15	NA	NA	NA	NA	NA	NA	NA	Yes	NA	NA	NA	NA	NA	NA	NA	NA	NA	NA	NA	57	92	39.7	7.22	88	NA	NA	NA	NA	NA	NA	NA	NA	NA	NA	NA	NA	NA	NA
R093	50151307	R093_16	female	68	Severe	2020-02-06	2020-03-10	2020-01-30	2020-02-14	9	16	NA	NA	NA	NA	NA	NA	NA	NA	NA	NA	NA	NA	NA	NA	NA	NA	negative	NA	NA	NA	NA	NA	NA	NA	NA	NA	NA	NA	NA	NA	NA	NA	NA	NA	NA	NA	NA	NA
R093	50151307	R093_17	female	68	Severe	2020-02-06	2020-03-10	2020-01-30	2020-02-15	10	17	NA	NA	NA	NA	NA	NA	NA	Yes	Yes	NA	NA	NA	NA	NA	NA	NA	NA	NA	NA	64	86	NA	8.18	83	NA	NA	NA	NA	NA	NA	NA	NA	NA	NA	NA	NA	NA	NA
R093	50151307	R093_18	female	68	Severe	2020-02-06	2020-03-10	2020-01-30	2020-02-16	11	18	NA	NA	NA	NA	NA	NA	NA	NA	NA	NA	NA	NA	NA	NA	NA	NA	NA	NA	NA	NA	NA	NA	NA	NA	NA	NA	NA	NA	NA	NA	NA	NA	NA	NA	NA	NA	NA	NA
R093	50151307	R093_19	female	68	Severe	2020-02-06	2020-03-10	2020-01-30	2020-02-17	12	19	NA	NA	NA	NA	NA	NA	NA	Yes	Yes	NA	NA	NA	NA	NA	NA	NA	NA	positive	NA	62	89	54.7	7.62	170	NA	NA	NA	NA	NA	NA	NA	NA	NA	NA	NA	NA	NA	NA
R093	50151307	R093_20	female	68	Severe	2020-02-06	2020-03-10	2020-01-30	2020-02-18	13	20	NA	NA	NA	NA	NA	NA	NA	Yes	Yes	NA	NA	NA	NA	NA	NA	NA	NA	NA	NA	NA	NA	NA	NA	NA	NA	NA	NA	NA	NA	NA	NA	NA	NA	NA	NA	NA	NA	NA
R093	50151307	R093_21	female	68	Severe	2020-02-06	2020-03-10	2020-01-30	2020-02-19	14	21	NA	NA	NA	NA	NA	NA	NA	NA	NA	NA	NA	NA	NA	NA	NA	NA	NA	NA	NA	NA	NA	NA	NA	NA	NA	NA	NA	NA	NA	NA	NA	NA	NA	NA	NA	NA	NA	NA
R093	50151307	R093_22	female	68	Severe	2020-02-06	2020-03-10	2020-01-30	2020-02-20	15	22	NA	NA	NA	NA	NA	NA	NA	Yes	Yes	NA	NA	NA	NA	NA	NA	NA	NA	NA	NA	NA	NA	NA	NA	NA	NA	NA	NA	NA	NA	NA	NA	NA	NA	NA	NA	NA	NA	NA
R093	50151307	R093_23	female	68	Severe	2020-02-06	2020-03-10	2020-01-30	2020-02-21	16	23	NA	NA	NA	NA	NA	NA	NA	NA	NA	NA	NA	NA	NA	NA	NA	NA	positive	NA	NA	NA	NA	NA	NA	NA	NA	NA	NA	NA	NA	NA	NA	NA	NA	NA	NA	NA	NA	NA
R093	50151307	R093_24	female	68	Severe	2020-02-06	2020-03-10	2020-01-30	2020-02-22	17	24	NA	NA	NA	NA	NA	NA	NA	NA	NA	NA	NA	NA	NA	NA	NA	NA	NA	NA	NA	NA	NA	NA	NA	NA	NA	NA	NA	NA	NA	NA	NA	NA	NA	NA	NA	NA	NA	NA
R093	50151307	R093_25	female	68	Severe	2020-02-06	2020-03-10	2020-01-30	2020-02-23	18	25	NA	NA	NA	NA	NA	NA	NA	Yes	Yes	NA	NA	NA	NA	NA	NA	NA	NA	NA	negative	53	94	54.5	8.89	217	NA	NA	NA	NA	NA	NA	NA	NA	NA	NA	NA	NA	NA	NA
R093	50151307	R093_26	female	68	Severe	2020-02-06	2020-03-10	2020-01-30	2020-02-24	19	26	NA	NA	NA	NA	NA	NA	NA	NA	NA	NA	NA	NA	NA	NA	NA	NA	positive	positive	NA	NA	NA	NA	NA	NA	NA	NA	NA	NA	NA	NA	NA	NA	NA	NA	NA	NA	NA	NA
R093	50151307	R093_27	female	68	Severe	2020-02-06	2020-03-10	2020-01-30	2020-02-25	20	27	NA	NA	NA	NA	NA	NA	NA	NA	NA	NA	NA	NA	NA	NA	NA	NA	NA	NA	NA	NA	NA	NA	NA	NA	NA	NA	NA	NA	NA	NA	NA	NA	NA	NA	NA	NA	NA	NA
R093	50151307	R093_28	female	68	Severe	2020-02-06	2020-03-10	2020-01-30	2020-02-26	21	28	NA	NA	NA	NA	NA	NA	NA	Yes	Yes	NA	NA	NA	NA	NA	NA	NA	NA	NA	NA	47	98	44.5	4.95	216	NA	NA	NA	NA	NA	NA	NA	NA	NA	NA	NA	NA	NA	NA
R093	50151307	R093_29	female	68	Severe	2020-02-06	2020-03-10	2020-01-30	2020-02-27	22	29	NA	NA	NA	NA	NA	NA	NA	NA	NA	NA	NA	NA	NA	NA	NA	NA	NA	NA	NA	NA	NA	NA	NA	NA	NA	NA	NA	NA	NA	NA	NA	NA	NA	NA	NA	NA	NA	NA
R093	50151307	R093_30	female	68	Severe	2020-02-06	2020-03-10	2020-01-30	2020-02-28	23	30	NA	NA	NA	NA	NA	NA	NA	Yes	Yes	NA	NA	NA	NA	NA	NA	NA	positive	NA	NA	45	99	36.7	3.71	232	NA	NA	NA	NA	NA	NA	NA	NA	NA	NA	NA	NA	NA	NA
R093	50151307	R093_31	female	68	Severe	2020-02-06	2020-03-10	2020-01-30	2020-02-29	24	31	NA	NA	NA	NA	NA	NA	NA	NA	NA	NA	NA	NA	NA	NA	NA	NA	NA	NA	NA	NA	NA	NA	NA	NA	NA	NA	NA	NA	NA	NA	NA	NA	NA	NA	NA	NA	NA	NA
R093	50151307	R093_32	female	68	Severe	2020-02-06	2020-03-10	2020-01-30	2020-03-01	25	32	NA	NA	NA	NA	NA	NA	NA	NA	NA	NA	NA	NA	NA	NA	NA	NA	NA	NA	NA	NA	NA	NA	NA	NA	NA	NA	NA	NA	NA	NA	NA	NA	NA	NA	NA	NA	NA	NA
R093	50151307	R093_33	female	68	Severe	2020-02-06	2020-03-10	2020-01-30	2020-03-02	26	33	5	Yes	Yes	Yes	11	NA	NA	NA	NA	NA	NA	NA	NA	NA	NA	NA	positive	NA	NA	NA	NA	NA	NA	NA	NA	NA	NA	NA	NA	NA	NA	NA	NA	NA	NA	NA	NA	NA
R093	50151307	R093_35	female	68	Severe	2020-02-06	2020-03-10	2020-01-30	2020-03-04	28	35	NA	NA	NA	NA	NA	NA	NA	Yes	Yes	NA	NA	NA	NA	NA	NA	NA	NA	NA	NA	45	99	NA	2.02	241	NA	NA	NA	NA	NA	NA	NA	NA	NA	NA	NA	NA	NA	NA
R093	50151307	R093_36	female	68	Severe	2020-02-06	2020-03-10	2020-01-30	2020-03-05	29	36	NA	NA	NA	NA	NA	NA	NA	NA	NA	NA	NA	NA	NA	NA	NA	NA	positive	negative	NA	NA	NA	NA	NA	NA	NA	NA	NA	NA	NA	NA	NA	NA	NA	NA	NA	NA	NA	NA
R093	50151307	R093_37	female	68	Severe	2020-02-06	2020-03-10	2020-01-30	2020-03-06	30	37	NA	NA	NA	NA	NA	NA	NA	Yes	Yes	NA	NA	NA	NA	NA	NA	NA	positive	negative	NA	NA	NA	NA	NA	NA	NA	NA	NA	NA	NA	NA	NA	NA	NA	NA	NA	NA	NA	NA
R093	50151307	R093_377	female	68	Severe	2020-02-06	2020-03-10	2020-01-30	2021-02-09	370	377	5	Yes	No	Yes	9	NA	Yes	NA	NA	NA	NA	NA	Yes	NA	NA	NA	negative	NA	negative	43	100	41.8	5.03	265	7	1.019	NA	negative	NA	negative	negative	negative	negative	1+	negative	NA	NA	0
R093	50151307	R093_38	female	68	Severe	2020-02-06	2020-03-10	2020-01-30	2020-03-07	31	38	NA	NA	NA	NA	NA	NA	NA	Yes	Yes	NA	NA	NA	NA	NA	NA	NA	NA	NA	NA	NA	NA	NA	NA	NA	NA	NA	NA	NA	NA	NA	NA	NA	NA	NA	NA	NA	NA	NA
R093	50151307	R093_39	female	68	Severe	2020-02-06	2020-03-10	2020-01-30	2020-03-08	32	39	NA	NA	NA	NA	NA	NA	NA	NA	NA	NA	NA	NA	NA	NA	NA	negative	NA	NA	NA	NA	NA	NA	NA	NA	NA	NA	NA	NA	NA	NA	NA	NA	NA	NA	NA	NA	NA	NA
R093	50151307	R093_40	female	68	Severe	2020-02-06	2020-03-10	2020-01-30	2020-03-09	33	40	NA	NA	NA	NA	NA	NA	Yes	Yes	Yes	NA	NA	NA	NA	NA	NA	NA	NA	NA	NA	48	97	NA	2.39	261	NA	NA	NA	NA	NA	NA	NA	NA	NA	NA	NA	NA	NA	NA
R093	50151307	R093_50	female	68	Severe	2020-02-06	2020-03-10	2020-01-30	2020-03-19	43	50	NA	NA	NA	NA	NA	NA	NA	NA	NA	NA	NA	NA	NA	NA	NA	NA	NA	NA	negative	NA	NA	NA	NA	NA	NA	NA	NA	NA	NA	NA	NA	NA	NA	NA	NA	NA	NA	NA
R093	50151307	R093_55	female	68	Severe	2020-02-06	2020-03-10	2020-01-30	2020-03-24	48	55	NA	NA	NA	NA	NA	NA	NA	Yes	NA	NA	NA	NA	NA	NA	NA	NA	negative	negative	NA	NA	NA	NA	NA	NA	7.5	1.015	negative	+-	negative	negative	negative	negative	negative	negative	negative	0	1	4
R093	50151307	R093_742	female	68	Severe	2020-02-06	2020-03-10	2020-01-30	2022-02-09	735	742	5	Yes	No	Yes	9	NA	NA	NA	NA	NA	NA	NA	NA	NA	NA	NA	NA	NA	NA	53	92	35.8	5.15	289	7	1.016	negative	+-	negative	negative	negative	negative	negative	negative	negative	0	4	21
R093	50151307	R093_8	female	68	Severe	2020-02-06	2020-03-10	2020-01-30	2020-02-06	1	8	NA	NA	NA	NA	NA	NA	Yes	Yes	Yes	NA	NA	NA	NA	NA	NA	NA	NA	positive	NA	61	90	24.6	5.72	233	6.5	1.015	3+	negative	negative	3+	negative	negative	negative	negative	negative	0	4	23
R093	50151307	R093_9	female	68	Severe	2020-02-06	2020-03-10	2020-01-30	2020-02-07	2	9	NA	NA	NA	NA	NA	NA	NA	Yes	Yes	Yes	NA	Yes	Yes	Yes	Yes	NA	NA	NA	NA	NA	NA	NA	NA	NA	NA	NA	NA	NA	NA	NA	NA	NA	NA	NA	NA	NA	NA	NA
R094	50151322	R094_13	male	31	non-Severe	2020-02-07	2020-02-16	2020-01-26	2020-02-07	1	13	NA	NA	NA	NA	NA	NA	NA	NA	NA	NA	NA	NA	NA	NA	NA	NA	NA	negative	NA	87	102	34.9	4.47	319	5	1.03	negative	negative	negative	negative	negative	negative	negative	negative	negative	0	2	13
R094	50151322	R094_14	male	31	non-Severe	2020-02-07	2020-02-16	2020-01-26	2020/2/8	2	14	NA	NA	NA	NA	NA	NA	NA	NA	NA	Yes	NA	Yes	Yes	Yes	Yes	NA	NA	NA	NA	NA	NA	NA	NA	NA	NA	NA	NA	NA	NA	NA	NA	NA	NA	NA	NA	NA	NA	NA
R094	50151322	R094_143	male	31	non-Severe	2020-02-07	2020-02-16	2020-01-26	2020-06-16	131	143	NA	NA	NA	NA	NA	NA	NA	NA	NA	NA	NA	NA	NA	NA	NA	NA	NA	negative	NA	NA	NA	NA	NA	NA	NA	NA	NA	NA	NA	NA	NA	NA	NA	NA	NA	NA	NA	NA
R094	50151322	R094_15	male	31	non-Severe	2020-02-07	2020-02-16	2020-01-26	2020-02-09	3	15	NA	NA	NA	NA	NA	NA	NA	NA	NA	NA	NA	NA	NA	NA	NA	NA	NA	NA	NA	NA	NA	NA	NA	NA	NA	NA	NA	NA	NA	NA	NA	NA	NA	NA	NA	NA	NA	NA
R094	50151322	R094_16	male	31	non-Severe	2020-02-07	2020-02-16	2020-01-26	2020/2/10	4	16	3	Yes	No	No	4	NA	NA	NA	NA	NA	NA	NA	NA	NA	NA	NA	NA	NA	NA	NA	NA	NA	NA	NA	NA	NA	NA	NA	NA	NA	NA	NA	NA	NA	NA	NA	NA	NA
R094	50151322	R094_18	male	31	non-Severe	2020-02-07	2020-02-16	2020-01-26	2020-02-12	6	18	NA	NA	NA	NA	NA	NA	NA	NA	NA	NA	NA	NA	NA	NA	NA	NA	NA	NA	negative	NA	NA	NA	NA	NA	NA	NA	NA	NA	NA	NA	NA	NA	NA	NA	NA	NA	NA	NA
R094	50151322	R094_19	male	31	non-Severe	2020-02-07	2020-02-16	2020-01-26	2020-02-13	7	19	NA	NA	NA	NA	NA	NA	NA	NA	NA	NA	NA	NA	NA	NA	NA	NA	NA	NA	negative	NA	NA	NA	NA	NA	NA	NA	NA	NA	NA	NA	NA	NA	NA	NA	NA	NA	NA	NA
R094	50151322	R094_20	male	31	non-Severe	2020-02-07	2020-02-16	2020-01-26	2020-02-14	8	20	NA	NA	NA	NA	NA	NA	NA	NA	NA	NA	NA	NA	NA	NA	NA	NA	NA	NA	NA	79	114	NA	2.71	330	NA	NA	NA	NA	NA	NA	NA	NA	NA	NA	NA	NA	NA	NA
R094	50151322	R094_21	male	31	non-Severe	2020-02-07	2020-02-16	2020-01-26	2020-02-15	9	21	3	Yes	No	No	4	NA	NA	NA	NA	NA	NA	NA	NA	NA	NA	NA	NA	negative	NA	NA	NA	NA	NA	NA	NA	NA	NA	NA	NA	NA	NA	NA	NA	NA	NA	NA	NA	NA
R094	50151322	R094_22	male	31	non-Severe	2020-02-07	2020-02-16	2020-01-26	2020-02-16	10	22	NA	NA	NA	NA	NA	NA	NA	NA	NA	NA	NA	NA	NA	NA	NA	NA	NA	NA	NA	NA	NA	NA	NA	NA	NA	NA	NA	NA	NA	NA	NA	NA	NA	NA	NA	NA	NA	NA
R094	50151322	R094_36	male	31	non-Severe	2020-02-07	2020-02-16	2020-01-26	2020-03-01	24	36	NA	NA	NA	NA	NA	NA	NA	NA	NA	NA	NA	NA	NA	NA	NA	NA	negative	negative	NA	78	100	NA	2.75	395	7	1.015	negative	negative	negative	negative	negative	negative	negative	negative	negative	NA	0	0
R094	50151322	R094_392	male	31	non-Severe	2020-02-07	2020-02-16	2020-01-26	2021-02-20	380	392	1	No	No	Yes	4	NA	NA	NA	NA	NA	NA	NA	Yes	NA	NA	NA	NA	NA	negative	63	124	55.3	3.26	345	6	1.025	NA	negative	NA	negative	negative	negative	negative	negative	negative	NA	NA	0
R094	50151322	R094_56	male	31	non-Severe	2020-02-07	2020-02-16	2020-01-26	2020-03-21	44	56	NA	NA	NA	NA	NA	NA	NA	NA	NA	NA	NA	NA	NA	NA	NA	NA	NA	NA	NA	79	114	NA	2.83	330	5	1.03	negative	negative	negative	negative	negative	negative	negative	negative	negative	0	1	3
R094	50151322	R094_58	male	31	non-Severe	2020-02-07	2020-02-16	2020-01-26	2020-03-23	46	58	NA	NA	NA	NA	NA	NA	NA	NA	NA	NA	NA	NA	NA	NA	NA	NA	negative	negative	NA	NA	NA	NA	NA	NA	NA	NA	NA	NA	NA	NA	NA	NA	NA	NA	NA	NA	NA	NA
R095	50151327	R095_10	female	50	non-Severe	2020-02-07	2020-02-23	2020-01-30	2020-02-08	2	10	4	Yes	Yes	No	7	NA	Yes	NA	Yes	NA	NA	NA	NA	NA	NA	NA	NA	NA	positive	73	83	20.4	5.21	239	NA	NA	NA	NA	NA	NA	NA	NA	NA	NA	NA	NA	NA	NA
R095	50151327	R095_13	female	50	non-Severe	2020-02-07	2020-02-23	2020-01-30	2020-02-11	5	13	NA	NA	NA	NA	NA	NA	NA	NA	Yes	NA	NA	NA	NA	NA	NA	NA	NA	NA	NA	NA	NA	NA	NA	NA	NA	NA	NA	NA	NA	NA	NA	NA	NA	NA	NA	NA	NA	NA
R095	50151327	R095_14	female	50	non-Severe	2020-02-07	2020-02-23	2020-01-30	2020-02-12	6	14	NA	NA	NA	NA	NA	NA	NA	NA	NA	NA	NA	NA	NA	NA	NA	NA	NA	NA	NA	NA	NA	NA	NA	NA	NA	NA	NA	NA	NA	NA	NA	NA	NA	NA	NA	NA	NA	NA
R095	50151327	R095_17	female	50	non-Severe	2020-02-07	2020-02-23	2020-01-30	2020-02-15	9	17	4	Yes	Yes	Yes	10	NA	NA	NA	Yes	NA	NA	NA	NA	NA	NA	NA	NA	NA	negative	85	69	50	5.96	260	NA	NA	NA	NA	NA	NA	NA	NA	NA	NA	NA	NA	NA	NA
R095	50151327	R095_173	female	50	non-Severe	2020-02-07	2020-02-23	2020-01-30	2020-07-20	165	173	NA	NA	NA	NA	NA	NA	NA	NA	NA	NA	NA	NA	NA	NA	NA	NA	negative	NA	NA	72	84	NA	5.57	279	5.5	1.03	negative	+-	negative	negative	1+	negative	2+	negative	negative	0	62	339
R095	50151327	R095_20	female	50	non-Severe	2020-02-07	2020-02-23	2020-01-30	2020-02-18	12	20	NA	NA	NA	NA	NA	NA	NA	NA	NA	NA	NA	NA	NA	NA	NA	NA	negative	NA	negative	NA	NA	NA	NA	NA	NA	NA	NA	NA	NA	NA	NA	NA	NA	NA	NA	NA	NA	NA
R095	50151327	R095_22	female	50	non-Severe	2020-02-07	2020-02-23	2020-01-30	2020-02-20	14	22	NA	NA	NA	NA	NA	NA	NA	NA	NA	NA	NA	NA	NA	NA	NA	NA	NA	negative	negative	NA	NA	NA	NA	NA	NA	NA	NA	NA	NA	NA	NA	NA	NA	NA	NA	NA	NA	NA
R095	50151327	R095_23	female	50	non-Severe	2020-02-07	2020-02-23	2020-01-30	2020-02-21	15	23	4	Yes	No	No	5	NA	NA	NA	NA	NA	NA	NA	NA	NA	NA	NA	NA	NA	NA	NA	NA	NA	NA	NA	NA	NA	NA	NA	NA	NA	NA	NA	NA	NA	NA	NA	NA	NA
R095	50151327	R095_24	female	50	non-Severe	2020-02-07	2020-02-23	2020-01-30	2020-02-22	16	24	NA	NA	NA	NA	NA	NA	Yes	NA	Yes	NA	NA	NA	NA	NA	NA	NA	NA	NA	NA	NA	NA	NA	NA	NA	NA	NA	NA	NA	NA	NA	NA	NA	NA	NA	NA	NA	NA	NA
R095	50151327	R095_376	female	50	non-Severe	2020-02-07	2020-02-23	2020-01-30	2021-02-08	368	376	0	No	No	No	0	NA	Yes	NA	NA	NA	NA	NA	NA	NA	NA	NA	NA	NA	negative	55	105	44.2	5.96	231	5	1.018	NA	negative	NA	negative	1+	negative	negative	negative	negative	NA	NA	0
R095	50151327	R095_39	female	50	non-Severe	2020-02-07	2020-02-23	2020-01-30	2020-03-08	31	39	NA	NA	NA	NA	NA	NA	NA	NA	NA	NA	NA	NA	NA	NA	NA	NA	positive	negative	NA	79	75	41.8	5.06	286	5.5	1.015	negative	negative	negative	negative	1+	negative	+-	negative	negative	0	6	35
R095	50151327	R095_40	female	50	non-Severe	2020-02-07	2020-02-23	2020-01-30	2020-03-09	32	40	NA	NA	NA	NA	NA	NA	NA	NA	NA	NA	NA	NA	NA	NA	NA	NA	negative	NA	NA	NA	NA	NA	NA	NA	NA	NA	NA	NA	NA	NA	NA	NA	NA	NA	NA	NA	NA	NA
R095	50151327	R095_742	female	50	non-Severe	2020-02-07	2020-02-23	2020-01-30	2022-02-09	734	742	NA	NA	NA	NA	NA	NA	NA	NA	NA	NA	NA	NA	NA	NA	NA	NA	NA	NA	NA	69	87	36.3	6.42	321	7	1.014	negative	negative	negative	negative	1+	negative	negative	negative	negative	0	2	13
R095	50151327	R095_9	female	50	non-Severe	2020-02-07	2020-02-23	2020-01-30	2020-02-07	1	9	NA	NA	NA	NA	NA	NA	NA	NA	NA	NA	NA	NA	NA	NA	NA	NA	NA	NA	NA	NA	NA	NA	NA	NA	6	1.02	3+	negative	negative	negative	1+	negative	negative	negative	negative	0	5	25
R096	50151329	R096_10	male	56	Severe	2020-02-07	2020-03-09	2020-02-01	2020-02-10	4	10	NA	NA	NA	NA	NA	NA	NA	NA	NA	NA	NA	NA	NA	NA	NA	NA	NA	NA	NA	NA	NA	NA	NA	NA	NA	NA	NA	NA	NA	NA	NA	NA	NA	NA	NA	NA	NA	NA
R096	50151329	R096_101	male	56	Severe	2020-02-07	2020-03-09	2020-02-01	2020-05-11	95	101	NA	NA	NA	NA	NA	NA	NA	NA	NA	NA	NA	NA	NA	NA	NA	NA	negative	NA	NA	72	98	NA	7.93	353	5.5	1.025	negative	negative	negative	negative	negative	negative	negative	negative	negative	0	1	3
R096	50151329	R096_11	male	56	Severe	2020-02-07	2020-03-09	2020-02-01	2020-02-11	5	11	NA	NA	NA	NA	NA	NA	NA	Yes	Yes	NA	NA	NA	NA	NA	NA	NA	NA	NA	NA	75	97	17.4	7.57	175	NA	NA	NA	NA	NA	NA	NA	NA	NA	NA	NA	NA	NA	NA
R096	50151329	R096_115	male	56	Severe	2020-02-07	2020-03-09	2020-02-01	2020-05-25	109	115	NA	NA	NA	NA	NA	NA	NA	NA	NA	NA	NA	NA	NA	NA	NA	NA	negative	NA	NA	76	96	NA	5.67	441	7	1.025	negative	negative	negative	negative	negative	negative	negative	negative	negative	0	4	20
R096	50151329	R096_12	male	56	Severe	2020-02-07	2020-03-09	2020-02-01	2020-02-12	6	12	NA	NA	NA	NA	NA	NA	NA	NA	NA	NA	NA	NA	NA	NA	NA	NA	NA	NA	NA	NA	NA	NA	NA	NA	NA	NA	NA	NA	NA	NA	NA	NA	NA	NA	NA	NA	NA	NA
R096	50151329	R096_13	male	56	Severe	2020-02-07	2020-03-09	2020-02-01	2020-02-13	7	13	NA	NA	NA	NA	NA	NA	NA	NA	NA	NA	NA	NA	NA	NA	NA	NA	NA	NA	NA	NA	NA	NA	NA	NA	NA	NA	NA	NA	NA	NA	NA	NA	NA	NA	NA	NA	NA	NA
R096	50151329	R096_14	male	56	Severe	2020-02-07	2020-03-09	2020-02-01	2020-02-14	8	14	NA	NA	NA	NA	NA	NA	NA	Yes	Yes	NA	NA	NA	NA	NA	NA	NA	positive	NA	NA	72	99	11.8	6.54	183	NA	NA	NA	NA	NA	NA	NA	NA	NA	NA	NA	NA	NA	NA
R096	50151329	R096_15	male	56	Severe	2020-02-07	2020-03-09	2020-02-01	2020-02-15	9	15	NA	NA	NA	NA	NA	NA	NA	NA	NA	NA	NA	NA	NA	NA	NA	NA	NA	NA	NA	NA	NA	NA	NA	NA	NA	NA	NA	NA	NA	NA	NA	NA	NA	NA	NA	NA	NA	NA
R096	50151329	R096_16	male	56	Severe	2020-02-07	2020-03-09	2020-02-01	2020-02-16	10	16	NA	NA	NA	NA	NA	NA	NA	NA	NA	NA	NA	NA	NA	NA	NA	NA	NA	NA	NA	NA	NA	NA	NA	NA	NA	NA	NA	NA	NA	NA	NA	NA	NA	NA	NA	NA	NA	NA
R096	50151329	R096_17	male	56	Severe	2020-02-07	2020-03-09	2020-02-01	2020-02-17	11	17	NA	NA	NA	NA	NA	NA	NA	Yes	Yes	NA	NA	NA	NA	NA	NA	NA	positive	NA	NA	71	100	17.4	7.86	120	NA	NA	NA	NA	NA	NA	NA	NA	NA	NA	NA	NA	NA	NA
R096	50151329	R096_18	male	56	Severe	2020-02-07	2020-03-09	2020-02-01	2020-02-18	12	18	NA	NA	NA	NA	NA	NA	NA	NA	NA	NA	NA	NA	NA	NA	NA	NA	NA	NA	NA	NA	NA	NA	NA	NA	NA	NA	NA	NA	NA	NA	NA	NA	NA	NA	NA	NA	NA	NA
R096	50151329	R096_19	male	56	Severe	2020-02-07	2020-03-09	2020-02-01	2020-02-19	13	19	NA	NA	NA	NA	NA	NA	NA	NA	NA	NA	NA	NA	NA	NA	NA	NA	NA	NA	NA	NA	NA	NA	NA	NA	NA	NA	NA	NA	NA	NA	NA	NA	NA	NA	NA	NA	NA	NA
R096	50151329	R096_20	male	56	Severe	2020-02-07	2020-03-09	2020-02-01	2020-02-20	14	20	NA	NA	NA	NA	NA	NA	NA	NA	NA	NA	NA	NA	NA	NA	NA	NA	NA	NA	NA	NA	NA	NA	NA	NA	NA	NA	NA	NA	NA	NA	NA	NA	NA	NA	NA	NA	NA	NA
R096	50151329	R096_21	male	56	Severe	2020-02-07	2020-03-09	2020-02-01	2020-02-21	15	21	NA	NA	NA	NA	NA	NA	NA	Yes	Yes	NA	NA	NA	NA	NA	NA	NA	NA	NA	NA	68	101	24	8.42	116	NA	NA	NA	NA	NA	NA	NA	NA	NA	NA	NA	NA	NA	NA
R096	50151329	R096_22	male	56	Severe	2020-02-07	2020-03-09	2020-02-01	2020-02-22	16	22	NA	NA	NA	NA	NA	NA	NA	Yes	Yes	NA	NA	NA	NA	NA	NA	NA	NA	NA	NA	NA	NA	NA	NA	NA	NA	NA	NA	NA	NA	NA	NA	NA	NA	NA	NA	NA	NA	NA
R096	50151329	R096_23	male	56	Severe	2020-02-07	2020-03-09	2020-02-01	2020-02-23	17	23	NA	NA	NA	NA	NA	NA	NA	Yes	Yes	NA	NA	NA	NA	NA	NA	NA	NA	NA	NA	68	101	16.9	7.22	117	NA	NA	NA	NA	NA	NA	NA	NA	NA	NA	NA	NA	NA	NA
R096	50151329	R096_24	male	56	Severe	2020-02-07	2020-03-09	2020-02-01	2020-02-24	18	24	NA	NA	NA	NA	NA	NA	NA	NA	NA	NA	NA	NA	NA	NA	NA	NA	NA	NA	NA	NA	NA	NA	NA	NA	NA	NA	NA	NA	NA	NA	NA	NA	NA	NA	NA	NA	NA	NA
R096	50151329	R096_25	male	56	Severe	2020-02-07	2020-03-09	2020-02-01	2020-02-25	19	25	NA	NA	NA	NA	NA	NA	NA	NA	NA	NA	NA	NA	NA	NA	NA	NA	NA	NA	NA	NA	NA	NA	NA	NA	NA	NA	NA	NA	NA	NA	NA	NA	NA	NA	NA	NA	NA	NA
R096	50151329	R096_26	male	56	Severe	2020-02-07	2020-03-09	2020-02-01	2020-02-26	20	26	NA	NA	NA	NA	NA	NA	NA	NA	NA	NA	NA	NA	NA	NA	NA	NA	positive	negative	NA	NA	NA	NA	NA	NA	NA	NA	NA	NA	NA	NA	NA	NA	NA	NA	NA	NA	NA	NA
R096	50151329	R096_27	male	56	Severe	2020-02-07	2020-03-09	2020-02-01	2020-02-27	21	27	NA	NA	NA	NA	NA	NA	NA	Yes	Yes	NA	NA	NA	NA	NA	NA	NA	NA	NA	NA	65	103	27	4.68	158	NA	NA	NA	NA	NA	NA	NA	NA	NA	NA	NA	NA	NA	NA
R096	50151329	R096_28	male	56	Severe	2020-02-07	2020-03-09	2020-02-01	2020-02-28	22	28	NA	NA	NA	NA	NA	NA	NA	NA	NA	NA	NA	NA	NA	NA	NA	NA	NA	NA	NA	NA	NA	NA	NA	NA	NA	NA	NA	NA	NA	NA	NA	NA	NA	NA	NA	NA	NA	NA
R096	50151329	R096_29	male	56	Severe	2020-02-07	2020-03-09	2020-02-01	2020-02-29	23	29	NA	NA	NA	NA	NA	NA	NA	Yes	Yes	NA	NA	NA	NA	NA	NA	NA	positive	positive	NA	63	105	26.6	4.35	149	NA	NA	NA	NA	NA	NA	NA	NA	NA	NA	NA	NA	NA	NA
R096	50151329	R096_30	male	56	Severe	2020-02-07	2020-03-09	2020-02-01	2020-03-01	24	30	NA	NA	NA	NA	NA	NA	NA	NA	NA	NA	NA	NA	NA	NA	NA	NA	NA	NA	NA	NA	NA	NA	NA	NA	NA	NA	NA	NA	NA	NA	NA	NA	NA	NA	NA	NA	NA	NA
R096	50151329	R096_31	male	56	Severe	2020-02-07	2020-03-09	2020-02-01	2020-03-02	25	31	5	Yes	Yes	Yes	11	NA	NA	Yes	Yes	NA	NA	NA	NA	NA	NA	NA	positive	NA	NA	68	101	NA	3.45	150	6	1.02	negative	negative	negative	2+	negative	negative	negative	negative	negative	0	0	1
R096	50151329	R096_32	male	56	Severe	2020-02-07	2020-03-09	2020-02-01	2020-03-03	26	32	NA	NA	NA	NA	NA	NA	NA	NA	NA	NA	NA	NA	NA	NA	NA	NA	NA	NA	NA	NA	NA	NA	NA	NA	NA	NA	NA	NA	NA	NA	NA	NA	NA	NA	NA	NA	NA	NA
R096	50151329	R096_33	male	56	Severe	2020-02-07	2020-03-09	2020-02-01	2020-03-04	27	33	NA	NA	NA	NA	NA	NA	NA	NA	NA	NA	NA	NA	NA	NA	NA	NA	NA	NA	NA	NA	NA	NA	NA	NA	NA	NA	NA	NA	NA	NA	NA	NA	NA	NA	NA	NA	NA	NA
R096	50151329	R096_34	male	56	Severe	2020-02-07	2020-03-09	2020-02-01	2020-03-05	28	34	NA	NA	NA	NA	NA	NA	NA	NA	NA	NA	NA	NA	NA	NA	NA	NA	NA	positive	NA	NA	NA	NA	NA	NA	NA	NA	NA	NA	NA	NA	NA	NA	NA	NA	NA	NA	NA	NA
R096	50151329	R096_35	male	56	Severe	2020-02-07	2020-03-09	2020-02-01	2020-03-06	29	35	NA	NA	NA	NA	NA	NA	NA	NA	NA	NA	NA	NA	NA	NA	NA	NA	negative	negative	NA	NA	NA	NA	NA	NA	NA	NA	NA	NA	NA	NA	NA	NA	NA	NA	NA	NA	NA	NA
R096	50151329	R096_36	male	56	Severe	2020-02-07	2020-03-09	2020-02-01	2020-03-07	30	36	NA	NA	NA	NA	NA	NA	NA	Yes	Yes	NA	NA	NA	NA	NA	NA	NA	NA	NA	NA	74	98	NA	4.49	206	NA	NA	NA	NA	NA	NA	NA	NA	NA	NA	NA	NA	NA	NA
R096	50151329	R096_37	male	56	Severe	2020-02-07	2020-03-09	2020-02-01	2020-03-08	31	37	NA	NA	NA	NA	NA	NA	NA	NA	NA	NA	NA	NA	NA	NA	NA	negative	NA	NA	NA	NA	NA	NA	NA	NA	NA	NA	NA	NA	NA	NA	NA	NA	NA	NA	NA	NA	NA	NA
R096	50151329	R096_38	male	56	Severe	2020-02-07	2020-03-09	2020-02-01	2020-03-09	32	38	NA	NA	NA	NA	NA	NA	NA	Yes	Yes	NA	NA	NA	NA	NA	NA	NA	NA	NA	NA	NA	NA	NA	NA	NA	NA	NA	NA	NA	NA	NA	NA	NA	NA	NA	NA	NA	NA	NA
R096	50151329	R096_501	male	56	Severe	2020-02-07	2020-03-09	2020-02-01	2021-06-15	495	501	3	No	No	Yes	6	NA	NA	NA	NA	NA	NA	NA	NA	NA	NA	NA	NA	NA	NA	NA	NA	NA	NA	NA	NA	NA	NA	NA	NA	NA	NA	NA	NA	NA	NA	NA	NA	NA
R096	50151329	R096_52	male	56	Severe	2020-02-07	2020-03-09	2020-02-01	2020-03-23	46	52	NA	NA	NA	NA	NA	NA	NA	Yes	NA	NA	NA	NA	NA	NA	NA	NA	negative	negative	NA	84	89	NA	5.68	388	6	1.02	negative	negative	negative	negative	negative	negative	negative	negative	negative	NA	0	0
R096	50151329	R096_58	male	56	Severe	2020-02-07	2020-03-09	2020-02-01	2020-03-29	52	58	NA	NA	NA	NA	NA	NA	NA	NA	NA	NA	NA	NA	NA	NA	NA	NA	NA	NA	NA	NA	NA	NA	NA	NA	NA	NA	NA	NA	NA	NA	NA	NA	NA	NA	NA	NA	NA	NA
R096	50151329	R096_66	male	56	Severe	2020-02-07	2020-03-09	2020-02-01	2020-04-06	60	66	NA	NA	NA	NA	NA	NA	NA	NA	NA	NA	NA	NA	NA	NA	NA	NA	positive	negative	NA	86	NA	40.9	6.04	447	5	1.03	negative	negative	negative	negative	negative	negative	negative	negative	negative	0	1	6
R096	50151329	R096_67	male	56	Severe	2020-02-07	2020-03-09	2020-02-01	2020-04-07	61	67	NA	NA	NA	NA	NA	NA	NA	NA	NA	NA	NA	NA	NA	NA	NA	NA	NA	NA	NA	77	NA	35.1	3.53	407	5	1.025	negative	negative	negative	negative	negative	negative	negative	negative	negative	0	1	4
R096	50151329	R096_69	male	56	Severe	2020-02-07	2020-03-09	2020-02-01	2020-04-09	63	69	NA	NA	NA	NA	NA	NA	NA	NA	NA	NA	NA	NA	NA	NA	NA	NA	positive	NA	NA	NA	NA	NA	NA	NA	NA	NA	NA	NA	NA	NA	NA	NA	NA	NA	NA	NA	NA	NA
R096	50151329	R096_7	male	56	Severe	2020-02-07	2020-03-09	2020-02-01	2020-02-07	1	7	NA	NA	NA	NA	NA	NA	NA	Yes	Yes	NA	NA	NA	NA	NA	NA	NA	NA	positive	NA	75	97	17.6	4.16	117	7.5	1.015	+-	negative	negative	2+	negative	negative	negative	negative	negative	0	0	2
R096	50151329	R096_73	male	56	Severe	2020-02-07	2020-03-09	2020-02-01	2020-04-13	67	73	NA	NA	NA	NA	NA	NA	NA	NA	NA	NA	NA	NA	NA	NA	NA	NA	positive	NA	NA	NA	NA	NA	NA	NA	NA	NA	NA	NA	NA	NA	NA	NA	NA	NA	NA	NA	NA	NA
R096	50151329	R096_77	male	56	Severe	2020-02-07	2020-03-09	2020-02-01	2020-04-17	71	77	NA	NA	NA	NA	NA	NA	NA	NA	NA	NA	NA	NA	NA	NA	NA	NA	negative	NA	NA	NA	NA	NA	NA	NA	NA	NA	NA	NA	NA	NA	NA	NA	NA	NA	NA	NA	NA	NA
R096	50151329	R096_8	male	56	Severe	2020-02-07	2020-03-09	2020-02-01	2020/2/8	2	8	NA	NA	NA	NA	NA	NA	NA	Yes	NA	Yes	NA	Yes	NA	Yes	Yes	NA	NA	NA	NA	NA	NA	NA	NA	NA	NA	NA	NA	NA	NA	NA	NA	NA	NA	NA	NA	NA	NA	NA
R096	50151329	R096_82	male	56	Severe	2020-02-07	2020-03-09	2020-02-01	2020-04-22	76	82	NA	NA	NA	NA	NA	NA	NA	NA	NA	NA	NA	NA	NA	NA	NA	NA	negative	NA	NA	NA	NA	NA	NA	NA	NA	NA	NA	NA	NA	NA	NA	NA	NA	NA	NA	NA	NA	NA
R096	50151329	R096_83	male	56	Severe	2020-02-07	2020-03-09	2020-02-01	2020-04-23	77	83	NA	NA	NA	NA	NA	NA	NA	NA	NA	NA	NA	NA	NA	NA	NA	NA	negative	NA	NA	NA	NA	NA	NA	NA	NA	NA	NA	NA	NA	NA	NA	NA	NA	NA	NA	NA	NA	NA
R096	50151329	R096_85	male	56	Severe	2020-02-07	2020-03-09	2020-02-01	2020-04-25	79	85	NA	NA	NA	NA	NA	NA	NA	NA	NA	NA	NA	NA	NA	NA	NA	NA	negative	NA	NA	NA	NA	NA	NA	NA	NA	NA	NA	NA	NA	NA	NA	NA	NA	NA	NA	NA	NA	NA
R096	50151329	R096_9	male	56	Severe	2020-02-07	2020-03-09	2020-02-01	2020-02-09	3	9	5	Yes	Yes	No	8	NA	NA	NA	NA	NA	NA	NA	NA	NA	NA	NA	NA	NA	NA	NA	NA	NA	NA	NA	NA	NA	NA	NA	NA	NA	NA	NA	NA	NA	NA	NA	NA	NA
R096	50151329	R096_94	male	56	Severe	2020-02-07	2020-03-09	2020-02-01	2020-05-04	88	94	NA	NA	NA	NA	NA	NA	NA	NA	NA	NA	NA	NA	NA	NA	NA	NA	negative	NA	NA	83	90	NA	7.49	442	5	1.03	negative	negative	+-	negative	negative	negative	negative	negative	1+	0	4	22
R097	50150776	R097_1	male	38	non-Severe	2020-01-25	2020-02-15	2020-01-24	2020-01-24	0	1	NA	NA	NA	NA	NA	NA	NA	NA	NA	NA	NA	NA	NA	NA	NA	NA	NA	NA	NA	NA	NA	NA	NA	NA	NA	NA	NA	NA	NA	NA	NA	NA	NA	NA	NA	NA	NA	NA
R097	50150776	R097_12	male	38	non-Severe	2020-01-25	2020-02-15	2020-01-24	2020-02-04	11	12	2	Yes	Yes	Yes	8	NA	Yes	NA	Yes	NA	NA	NA	NA	NA	NA	NA	NA	NA	positive	71	113	42.4	2.87	433	NA	NA	NA	NA	NA	NA	NA	NA	NA	NA	NA	NA	NA	NA
R097	50150776	R097_13	male	38	non-Severe	2020-01-25	2020-02-15	2020-01-24	2020-02-05	12	13	NA	NA	NA	NA	NA	Yes	NA	Yes	NA	NA	NA	NA	NA	NA	NA	NA	NA	NA	NA	NA	NA	NA	NA	NA	NA	NA	NA	NA	NA	NA	NA	NA	NA	NA	NA	NA	NA	NA
R097	50150776	R097_148	male	38	non-Severe	2020-01-25	2020-02-15	2020-01-24	2020-06-19	147	148	NA	NA	NA	NA	NA	NA	NA	NA	NA	NA	NA	NA	NA	NA	NA	NA	NA	NA	NA	74	111	NA	4.27	518	5	1.03	negative	negative	negative	negative	negative	negative	negative	negative	negative	0	2	12
R097	50150776	R097_16	male	38	non-Severe	2020-01-25	2020-02-15	2020-01-24	2020-02-08	15	16	NA	NA	NA	NA	NA	NA	NA	NA	NA	NA	NA	NA	NA	NA	NA	NA	NA	NA	negative	NA	NA	NA	NA	NA	NA	NA	NA	NA	NA	NA	NA	NA	NA	NA	NA	NA	NA	NA
R097	50150776	R097_17	male	38	non-Severe	2020-01-25	2020-02-15	2020-01-24	2020-02-09	16	17	NA	NA	NA	NA	NA	NA	NA	NA	NA	NA	NA	NA	NA	NA	NA	NA	NA	NA	negative	NA	NA	NA	NA	NA	NA	NA	NA	NA	NA	NA	NA	NA	NA	NA	NA	NA	NA	NA
R097	50150776	R097_18	male	38	non-Severe	2020-01-25	2020-02-15	2020-01-24	2020-02-10	17	18	NA	NA	NA	NA	NA	NA	NA	NA	NA	NA	NA	NA	NA	NA	NA	NA	NA	NA	NA	NA	NA	NA	NA	NA	NA	NA	NA	NA	NA	NA	NA	NA	NA	NA	NA	NA	NA	NA
R097	50150776	R097_19	male	38	non-Severe	2020-01-25	2020-02-15	2020-01-24	2020/2/11	18	19	1	Yes	No	No	2	NA	NA	NA	NA	NA	NA	NA	NA	NA	NA	NA	NA	negative	NA	NA	NA	NA	NA	NA	NA	NA	NA	NA	NA	NA	NA	NA	NA	NA	NA	NA	NA	NA
R097	50150776	R097_2	male	38	non-Severe	2020-01-25	2020-02-15	2020-01-24	2020-01-25	1	2	NA	NA	NA	NA	NA	NA	NA	NA	NA	NA	NA	NA	NA	NA	NA	NA	positive	NA	NA	80	108	NA	3.82	429	NA	NA	NA	NA	NA	NA	NA	NA	NA	NA	NA	NA	NA	NA
R097	50150776	R097_20	male	38	non-Severe	2020-01-25	2020-02-15	2020-01-24	2020-02-12	19	20	NA	NA	NA	NA	NA	NA	NA	NA	NA	NA	NA	NA	NA	NA	NA	NA	NA	negative	NA	NA	NA	NA	NA	NA	NA	NA	NA	NA	NA	NA	NA	NA	NA	NA	NA	NA	NA	NA
R097	50150776	R097_21	male	38	non-Severe	2020-01-25	2020-02-15	2020-01-24	2020-02-13	20	21	NA	NA	NA	NA	NA	NA	NA	NA	NA	NA	NA	NA	NA	NA	NA	NA	NA	NA	NA	NA	NA	NA	NA	NA	NA	NA	NA	NA	NA	NA	NA	NA	NA	NA	NA	NA	NA	NA
R097	50150776	R097_22	male	38	non-Severe	2020-01-25	2020-02-15	2020-01-24	2020-02-14	21	22	NA	NA	NA	NA	NA	NA	Yes	NA	Yes	NA	NA	NA	NA	NA	NA	NA	NA	NA	NA	71	113	22.5	3.4	529	NA	NA	NA	NA	NA	NA	NA	NA	NA	NA	NA	NA	NA	NA
R097	50150776	R097_23	male	38	non-Severe	2020-01-25	2020-02-15	2020-01-24	2020-02-15	22	23	NA	NA	NA	NA	NA	NA	NA	Yes	NA	NA	NA	NA	NA	NA	NA	NA	NA	NA	NA	NA	NA	NA	NA	NA	NA	NA	NA	NA	NA	NA	NA	NA	NA	NA	NA	NA	NA	NA
R097	50150776	R097_3	male	38	non-Severe	2020-01-25	2020-02-15	2020-01-24	2020-01-26	2	3	1	Yes	No	No	2	NA	NA	NA	NA	NA	Yes	NA	NA	NA	NA	NA	NA	NA	NA	NA	NA	NA	NA	NA	5.5	1.015	negative	negative	negative	+-	negative	negative	negative	negative	negative	0	1	3
R097	50150776	R097_37	male	38	non-Severe	2020-01-25	2020-02-15	2020-01-24	2020-02-29	36	37	NA	NA	NA	NA	NA	NA	NA	Yes	NA	NA	NA	NA	NA	NA	NA	NA	negative	NA	NA	67	116	NA	3.92	539	5	1.025	negative	negative	negative	negative	negative	negative	negative	negative	negative	0	1	5
R097	50150776	R097_383	male	38	non-Severe	2020-01-25	2020-02-15	2020-01-24	2021-02-09	382	383	0	No	No	No	0	NA	Yes	NA	NA	NA	NA	NA	NA	NA	NA	NA	negative	NA	NA	57	123	51.9	3.34	386	6	1.021	NA	negative	NA	negative	negative	negative	negative	negative	negative	NA	NA	0
R097	50150776	R097_4	male	38	non-Severe	2020-01-25	2020-02-15	2020-01-24	2020-01-27	3	4	NA	NA	NA	NA	NA	NA	NA	NA	NA	NA	NA	NA	NA	NA	NA	NA	NA	NA	NA	NA	NA	NA	NA	NA	NA	NA	NA	NA	NA	NA	NA	NA	NA	NA	NA	NA	NA	NA
R097	50150776	R097_55	male	38	non-Severe	2020-01-25	2020-02-15	2020-01-24	2020-03-18	54	55	NA	NA	NA	NA	NA	NA	NA	Yes	NA	NA	NA	NA	NA	NA	NA	NA	negative	negative	NA	71	113	NA	4.19	522	5	1.03	negative	negative	negative	negative	negative	negative	negative	negative	negative	0	1	7
[truncated: 975 more rows]
[truncated: 162 more columns]
