# Supplementary material for: Pulmonary and Renal Long COVID at Two-year Revisit
Source: Research Square preprint supplement (doi:10.21203/rs.3.rs-1513873/v1), 2022-04-19
Supplement: Supplementary file 3 [file TableS4.xlsx]

## Sheet: Clinical indicator and antibody
Category	Indexes	Unit	Abbreviations	Equipment source	Reagent source	Lot number	Equipment source1	Reagent source1	Lot number1	Equipment source2	Reagent source2	Lot number2
RNA	Nasopharyngeal swab RNA	/	/	Shanghai ZJ Bio-Tech-EX3600, ABI 7500	Shanghai ZJ Bio-Tech	Cat # P20200105	Zybio-EXM6000, ABI 7500	Mingde	210127	/	/	/
	Sputum RNA	/	/	Shanghai ZJ Bio-Tech-EX3600, ABI 7500	Shanghai ZJ Bio-Tech	Cat # P20200105	Zybio-EXM6000, ABI 7500	Mingde	210127	/	/	/
	Stool RNA	/	/	Shanghai ZJ Bio-Tech-EX3600, ABI 7500	Shanghai ZJ Bio-Tech	Cat # P20200105	Zybio-EXM6000, ABI 7500	Mingde	210127	/	/	/
	Throat swab RNA	/	/	Shanghai ZJ Bio-Tech-EX3600, ABI 7500	Shanghai ZJ Bio-Tech	Cat # P20200105	Zybio-EXM6000, ABI 7500	Mingde	210127	/	/	/
Renal function	Creatinine	μmol/L	Crea	BECKMAN-AU5821	Beckman Coulter	Cat # 2587	BECKMAN-AU5821	Ausbio	Cat #191012	BECKMAN-AU5821	Ausbio	Cat #210726
	Estimated glomerular filtration rate	mL/min/1.73m2	Egfr	/	/	/	/	/	/	/	/	/
	Retinol binding protein	mg/L	RBP	BECKMAN-AU5821	Beijia	Cat # 20190412	BECKMAN-AU5821	Beijia	Cat #20200628	BECKMAN-AU5821	Beijia	Cat #20211025
	Urea	mmol/L	UREA	BECKMAN-AU5821	Beckman Coulter	Cat # AUZ6735	BECKMAN-AU5821	Beckman Coulter	Cat #AUZ8361	BECKMAN-AU5821	Beckman Coulter	Cat #AUZ9369
	Uric acid	μmol/L	UA	BECKMAN-AU5821	Beckman Coulter	Cat # AUZ6918	BECKMAN-AU5821	Beckman Coulter	Cat #AUZ8225	BECKMAN-AU5821	Beckman Coulter	Cat #AUZ9339
	Urine PH	/	PH_urine	URIT-1600	URIT	Cat #URIT-11F-56198148	SYSMEX-UC3500	SYSMEX	Cat #AC0027	SYSMEX-UC3500	SYSMEX	Cat #AC1009
	Urine specific gravity	/	SG_urine	URIT-1600	URIT	Cat #URIT-11F-56198148	SYSMEX-UC3500	SYSMEX	Cat #AC0027	SYSMEX-UC3500	SYSMEX	Cat #AC1009
	Urine VitC	/	VitC_urine	URIT-1600	URIT	Cat #URIT-11F-56198148	SYSMEX-UC3500	SYSMEX	Cat #AC0027	SYSMEX-UC3500	SYSMEX	Cat #AC1009
	Urinary occult blood	/	E1_urine	URIT-1600	URIT	Cat #URIT-11F-56198148	SYSMEX-UC3500	SYSMEX	Cat #AC0027	SYSMEX-UC3500	SYSMEX	Cat #AC1009
	Urine protein	/	URO_urine	URIT-1600	URIT	Cat #URIT-11F-56198148	SYSMEX-UC3500	SYSMEX	Cat #AC0027	SYSMEX-UC3500	SYSMEX	Cat #AC1009
	Urine glucose	/	GLU_urine	URIT-1600	URIT	Cat #URIT-11F-56198148	SYSMEX-UC3500	SYSMEX	Cat #AC0027	SYSMEX-UC3500	SYSMEX	Cat #AC1009
	Urinary nitrite	/	NIT_urine	URIT-1600	URIT	Cat #URIT-11F-56198148	SYSMEX-UC3500	SYSMEX	Cat #AC0027	SYSMEX-UC3500	SYSMEX	Cat #AC1009
	Urine ketone	/	KET_urine	URIT-1600	URIT	Cat #URIT-11F-56198148	SYSMEX-UC3500	SYSMEX	Cat #AC0027	SYSMEX-UC3500	SYSMEX	Cat #AC1009
	Urine leukocyte	/	LEU_urine	URIT-1600	URIT	Cat #URIT-11F-56198148	SYSMEX-UC3500	SYSMEX	Cat #AC0027	SYSMEX-UC3500	SYSMEX	Cat #AC1009
	Urobilinogen	/	URO_urine	URIT-1600	URIT	Cat #URIT-11F-56198148	SYSMEX-UC3500	SYSMEX	Cat #AC0027	SYSMEX-UC3500	SYSMEX	Cat #AC1009
	Urobilirubin	/	BIL_urine	URIT-1600	URIT	Cat #URIT-11F-56198148	SYSMEX-UC3500	SYSMEX	Cat #AC0027	SYSMEX-UC3500	SYSMEX	Cat #AC1009
	Urine small round epithelial cells	/μL	SRC_urine	SYSMEX-UF-1000	SYSMEX	Cat #UFII SEARCH-BAC-A7034，Cat #UFII SRARCH-SED-A9010，Cat #UPB-300A-A8026	SYSMEX-UF-5000	SYSMEX	Cat #UF-CELLSHEATH-A0132,Cat #UF-Fluorocell-A0020,Cat # UFII SEARCH-BAC-A9037,Cat #UFII SRARCH-SED-A9046,Cat #UF-CELLPACK-A0015,Cat #UPB-300A-A9043	SYSMEX-UF-5000	SYSMEX	Cat #UF-CELLSHEATH-A1053,Cat #UF-CELLPACK-A1012,Cat #UF-Fluorocell-A1008
	Urine white blood cell	/HP	WBC_urine_HP	SYSMEX-UF-1000	SYSMEX		SYSMEX-UF-5000	SYSMEX		SYSMEX-UF-5000	SYSMEX
	Urine white blood cells	/μL	WBC_urine	SYSMEX-UF-1000	SYSMEX		SYSMEX-UF-5000	SYSMEX		SYSMEX-UF-5000	SYSMEX
	Urine red blood cell	/HP	RBC_urine_HP	SYSMEX-UF-1000	SYSMEX		SYSMEX-UF-5000	SYSMEX		SYSMEX-UF-5000	SYSMEX
	Urine red blood cells	/μL	RBC_urine	SYSMEX-UF-1000	SYSMEX		SYSMEX-UF-5000	SYSMEX		SYSMEX-UF-5000	SYSMEX
	Urine yeast	/	YLC_urine	SYSMEX-UF-1000	SYSMEX		SYSMEX-UF-5000	SYSMEX		SYSMEX-UF-5000	SYSMEX
	Urine bacteria	/HP	BACT_urine_HP	SYSMEX-UF-1000	SYSMEX		SYSMEX-UF-5000	SYSMEX		SYSMEX-UF-5000	SYSMEX
	Urine crystal	/LP	jiejing_urine	SYSMEX-UF-1000	SYSMEX		SYSMEX-UF-5000	SYSMEX		SYSMEX-UF-5000	SYSMEX
	Urine epithelial cells	/μL	EC_urine	SYSMEX-UF-1000	SYSMEX		SYSMEX-UF-5000	SYSMEX		SYSMEX-UF-5000	SYSMEX
	Urine cast	/LP	P_CAST_urine	SYSMEX-UF-1000	SYSMEX		SYSMEX-UF-5000	SYSMEX		SYSMEX-UF-5000	SYSMEX
	Urine cast	/μL	CAST_urine	SYSMEX-UF-1000	SYSMEX		SYSMEX-UF-5000	SYSMEX		SYSMEX-UF-5000	SYSMEX
	Urine transparent tube	/LP	touming_cast_urine	SYSMEX-UF-1000	SYSMEX		SYSMEX-UF-5000	SYSMEX		SYSMEX-UF-5000	SYSMEX
	Urine granular cast	/LP	keli_cast_urine	SYSMEX-UF-1000	SYSMEX		SYSMEX-UF-5000	SYSMEX		SYSMEX-UF-5000	SYSMEX
	Mucus filaments in urine	/	niansi_urine	SYSMEX-UF-1000	SYSMEX		SYSMEX-UF-5000	SYSMEX		SYSMEX-UF-5000	SYSMEX
	Urine calcium	mmol/L	Ca_urine	BECKMAN-AU5821	Beckman Coulter	Cat # AUZ6901	BECKMAN-AU5821	Beckman Coulter	Cat #AUZ7931	/	/	/
	Urine calcium/creatinine	mmol/mmol	Ca.Cr_urine	/	/	/	/	/	/	/	/	/
	Urine chlorine	mmol/L	Cl_urine	BECKMAN-AU5821	Beckman Coulter	Cat # AUZ6952	BECKMAN-AU5821	Beckman Coulter	Cat #AUZ8696	/	/	/
	Urine chlorine/creatinine	mmol/mmol	Cl.Cr_urine	/	/	/	/	/	/	/	/	/
	Urine phosphorus	mmol/L	P_urine	BECKMAN-AU5821	Beckman Coulter	Cat # AUZ6805	BECKMAN-AU5821	Leadman	Cat #20091605	/	/	/
	Urine phosphorus/creatinine	mmol/mmol	P.Cr_urine	/	/	/	/	/	/	/	/	/
	Urine potassium	mmol/L	potassium_urine	BECKMAN-AU5821	Beckman Coulter	Cat # AUZ6952	BECKMAN-AU5821	Beckman Coulter	Cat #AUZ8696	/	/	/
	Urine potassium/creatinine	mmol/mmol	K.Cr_urine	/	/	/	/	/	/	/	/	/
	Urine sodium	mmol/L	sodium_urine	BECKMAN-AU5821	Beckman Coulter	Cat # AUZ6952	BECKMAN-AU5821	Beckman Coulter	Cat #AUZ8696	/	/	/
	Urine sodium/creatinine	mmol/mmol	Sodium.Cr_urine	/	/	/	/	/	/	/	/	/
	Urine magnesium	mmol/L	Mg_urine	BECKMAN-AU5821	Beckman Coulter	Cat # AUZ6692	BECKMAN-AU5821	Beckman Coulter	Cat #AUZ8238	/	/	/
	Urine magnesium/creatinine	mmol/mmol	Mg.Cr_urine	/	/	/	/	/	/	/	/	/
	Urine creatinine	μmol/L	Cr_urine	BECKMAN-AU5821	Beckman Coulter	Cat # 2587	BECKMAN-AU5821	Ausbio	Cat #191012	/	/	/
	Urine urea nitrogen / creatinine	mol/mmol	BUN.Cr_urine	/	/	/	/	/	/	/	/	/
	Urine urea nitrogen quantification	mmol/L	Bun_urine	BECKMAN-AU5821	Beckman Coulter	Cat # AUZ6735	BECKMAN-AU5821	Beckman Coulter	Cat #AUZ8361	/	/	/
	Urine uric acid / creatinine	μmol/mmol	UA.Cr_urine	/	/	/	/	/	/	/	/	/
	Urine uric acid quantification	μmol/L	UA_urine	BECKMAN-AU5821	Beckman Coulter	Cat # AUZ6918	BECKMAN-AU5821	Beckman Coulter	Cat #AUZ8225	/	/	/
	Urine glucose quantification	mmol/L	Glu_dl_urine	BECKMAN-AU5821	Beckman Coulter	Cat # AUZ6734	BECKMAN-AU5821	Leadman	Cat #20082006	/	/	/
	Urine glucose/creatinine	mmol/mmol	Glu.Cr_urine	/	/	/	/	/	/	/	/	/
	Urine microalbumin	mg/dL	malb_urine	/	/	/	Abbott C16000	DIASYS	Cat # 29009/60138288	/	/	/
	Urine N-acetyl- β- D-glucosidase	U/L	NAG_urine	/	/	/	Abbott C16000	Lidman	Cat #20092907	/	/	/
	Urine NAG/creatinine	mmol/mmol	NAG.Cr_urine	/	/	/	/	/	/	/	/	/
	Urinary protein quantification	mg/dL	UPRO_dl	BECKMAN-AU5821	Diasys	Cat # 60140969	BECKMAN-AU5821	DIASYS	Cat # 60138288	/	/	/
	Urine protein/ creatinine	g/g	PRO.Cr_urine	/	/	/	/	/	/	/	/	/
	Urine retinol binding protein	mg/L	URBP	/	/	/	Abbott C16000	Byron	Cat #20MOA29	/	/	/
	Urine transferrin	mg/dL	Tf_urine	/	/	/	Abbott C16000	DIASYS	Cat # 28999/60138287	/	/	/
	Urine immunoglobulin G	mg/dL	IgG_urine	/	/	/	Abbott C16000	DIASYS	Cat # 28926/60138119	/	/	/
	Urine α1 microglobulin	mg/dL	α1m_urine	/	/	/	Abbott C16000	DIALAB	Cat # 0101/191204FM	/	/	/
	Urine β2 microglobulin	mg/L	Uβ2M	/	/	/	Abbott C16000	Byron	Cat #20MOA36	/	/	/
Liver function	Adenosine deaminase	U/L	ADA	BECKMAN-AU5821	Kuake	Cat # 181127	BECKMAN-AU5821	Leadman	Cat #20092207	BECKMAN-AU5821	Leadman	Cat #21031801
	Alanine aminotransferase	U/L	ALT	BECKMAN-AU5821	Beckman Coulter	Cat # AUZ6709	BECKMAN-AU5821	Beckman Coulter	Cat #AUZ8037	BECKMAN-AU5821	Beckman Coulter	Cat #AUZ9329
	Albumin globulin ratio	/	A_G	/	/	/	/	/	/	/	/	/
	Albumin	g/L	ALB	BECKMAN-AU5821	Beckman Coulter	Cat # AUZ6708	BECKMAN-AU5821	Leadman	Cat #20032601	BECKMAN-AU5821	Leadman	Cat #AUZ9658
	Alkaline phosphatase	U/L	ALP	BECKMAN-AU5821	Beckman Coulter	Cat # AUZ6538	BECKMAN-AU5821	Beckman Coulter	Cat #AUZ8389	BECKMAN-AU5821	Beckman Coulter	Cat #AUZ9239
	Aspartate aminotransferase	U/L	AST	BECKMAN-AU5821	Beckman Coulter	Cat # AUZ6213	BECKMAN-AU5821	Beckman Coulter	Cat #AUZ8415	BECKMAN-AU5821	Beckman Coulter	Cat #AUZ9331
	Direct bilirubin	μmol/L	DB	BECKMAN-AU5821	Beckman Coulter	Cat # AUZ6782	BECKMAN-AU5821	Leadman	Cat #20081824	BECKMAN-AU5821	Leadman	Cat #21071304
	Gamma-glutamine transferase	U/L	GGT	BECKMAN-AU5821	Beckman Coulter	Cat # AUZ6678	BECKMAN-AU5821	Beckman Coulter	Cat #AUZ8228	BECKMAN-AU5821	Beckman Coulter	Cat #AUZ9355
	Globulin	g/L	GLO	/	/	/	/	/	/	/	/	/
	Indirect bilirubin	μmol/L	IDB	/	/	/	/	/	/	/	/	/
	Prealbumin	mg/dL	PAB	BECKMAN-AU5821	Saike	Cat # 20190102	BECKMAN-AU5821	Leadman	Cat #20091307	BECKMAN-AU5821	Leadman	Cat #21040213
	Total bile acid	μmol/L	TBA	BECKMAN-AU5821	Kuake	Cat # 190508	BECKMAN-AU5821	Beckman Coulter	Cat #AUZ7891	BECKMAN-AU5821	Beckman Coulter	Cat #AUZ9217
	Total bilirubin	μmol/L	TB	BECKMAN-AU5821	Beckman Coulter	Cat # 14603988871	BECKMAN-AU5821	Leadman	Cat #20082807	BECKMAN-AU5821	Leadman	Cat #21071905
	Total protein	g/L	TP	BECKMAN-AU5821	Beckman Coulter	Cat # AUZ6807	BECKMAN-AU5821	Leadman	Cat #20091907	BECKMAN-AU5821	Leadman	Cat #20091907
	α- L-fucosidase	U/L	AFU	BECKMAN-AU5821	Kuake	Cat # 190314	BECKMAN-AU5821	Leadman	Cat #1490524	BECKMAN-AU5821	Leadman	Cat #21052601
Intestinal function	Fecal color	/	F_color	KU-F10	Keyu		KU-F10	Keyu		KU-F10	/	/
	Fecal property	/	F_smear	KU-F10	Keyu		KU-F10	Keyu		KU-F10	/	/
	Fecal fat globules	/	Lipomiero	KU-F10	Keyu		KU-F10	Keyu		KU-F10	/	/
	Fecal fungi	/	F_fungus	KU-F10	Keyu		KU-F10	Keyu		KU-F10	/	/
	Fecal occult blood	/	F_OB	KU-F10	Keyu	Cat #FOB-1908251	KU-F10	Keyu	Cat #FOB-2009182	KU-F10	Keyu	Cat #FOB-2111041020
	Fecal red blood cells	/HP	F_RBC	KU-F10	Keyu		KU-F10	Keyu		KU-F10	/	/
	Fecal white blood cells	/HP	F_WBC	KU-F10	Keyu		KU-F10	Keyu		KU-F10	/	/
Infect index	C-reactive protein	mg/L	CRP	BECKMAN-AU5821	Beckman Coulter	Cat # 1056A	BECKMAN-AU5821	Beckman Coulter	Cat #2363	BECKMAN-AU5821	Beckman Coulter	Cat #2384
	Erythrocyte sedimentation rate	mm/h	ESR	ALIFAX-TEST-1	Alifax	Cat # 195910	ALIFAX-TEST-1	Alifax	Cat # 195910	Alifax-TEST-1	/	/
	Procalcitonin	pg/mL	PCT	ROCHE-COBAS-E411	Roche	Cat # 43058803	ROCHE-COBAS-E411	Roche	Cat #46615903	/	/	/
	Serum amyloid A	mg/L	SAA	BECKMAN-AU5821	Purebio	Cat # SS0226	BECKMAN-AU5821	Purebio	Cat #SS0298	BECKMAN-AU5821	Purebio	Cat #SS2235
	Whole blood C-reactive protein	mg/L	CRP_qx	OTTOMAN	UPPER	Cat # 20190405	PA-990	Lifetronic	Cat #8820056	/	/	/
	Whole blood serum amyloid A	mg/L	SAA_qx	OTTOMAN	UPPER	Cat #20200124	OTTOMAN	UPPER	Cat #20200601	/	/	/
Immune index	Anti streptolysin O	KIU/L	ASO	BECKMAN-AU5821	Beckman Coulter	Cat # 2586	BECKMAN-AU5821	Beckman Coulter	Cat #2591	BECKMAN-AU5821	Beckman Coulter	Cat #2602
	CD19(+) lymphocyte counts	/μL	CD19_absolute_value	BD-FACSCANTO Ⅱ	BD	Cat # 33593	BD-FACSCANTO Ⅱ	BD	Cat #92766	BD-FACSCANTO Ⅱ	BD	Cat #23747
	CD19(+) lymphocyte ratio	%	total_BCD19	BD-FACSCANTO Ⅱ	BD	Cat # 33593	BD-FACSCANTO Ⅱ	BD	Cat #92766	BD-FACSCANTO Ⅱ	BD	Cat #23747
	CD3(+) lymphocyte counts	/μL	CD3_absolute_value	BD-FACSCANTO Ⅱ	BD	Cat # 33593	BD-FACSCANTO Ⅱ	BD	Cat #92766	BD-FACSCANTO Ⅱ	BD	Cat #23747
	CD3(+) lymphocyte ratio	%	total_TCD3	BD-FACSCANTO Ⅱ	BD	Cat # 33593	BD-FACSCANTO Ⅱ	BD	Cat #92766	BD-FACSCANTO Ⅱ	BD	Cat #23747
	CD4(+) lymphocyte counts	/μL	CD4_absolute_value	BD-FACSCANTO Ⅱ	BD	Cat # 33593	BD-FACSCANTO Ⅱ	BD	Cat #92766	BD-FACSCANTO Ⅱ	BD	Cat #23747
	CD4(+) lymphocyte ratio	%	CD4	BD-FACSCANTO Ⅱ	BD	Cat # 33593	BD-FACSCANTO Ⅱ	BD	Cat #92766	BD-FACSCANTO Ⅱ	BD	Cat #23747
	CD4/CD8	/	CD4_CD8	/	/	/	/	/	/	/	/	/
	CD8(+) lymphocyte counts	/μL	CD8_absolute_value	BD-FACSCANTO Ⅱ	BD	Cat # 33593	BD-FACSCANTO Ⅱ	BD	Cat #92766	BD-FACSCANTO Ⅱ	BD	Cat #23747
	CD8(+) lymphocyte ratio	%	CD8	BD-FACSCANTO Ⅱ	BD	Cat # 33593	BD-FACSCANTO Ⅱ	BD	Cat #92766	BD-FACSCANTO Ⅱ	BD	Cat #23747
	Complement C1q	mg/L	C1q	BECKMAN-AU5821	Beijia	Cat # 20190811	BECKMAN-AU5821	Beijia	Cat #20201023	BECKMAN-AU5821	Beijia	Cat #20210820
	Complement C3	g/L	C3	BECKMAN-AU5821	Beckman Coulter	Cat # 2550	BECKMAN-AU5821	Beckman Coulter	Cat #2552	BECKMAN-AU5821	Beckman Coulter	Cat #2555
	Complement C4	g/L	C4	BECKMAN-AU5821	Beckman Coulter	Cat # 2550	BECKMAN-AU5821	Beckman Coulter	Cat #2554	BECKMAN-AU5821	Beckman Coulter	Cat #2558
	Interferon-γ	pg/mL	IFN_γ	BD-FACSCANTO Ⅱ	Jiangxi nuode	Cat # 20190601	BD-FACSCANTO Ⅱ	Jiangxi nuode	Cat #20200501	BD-FACSCANTO Ⅱ	Jiangxi nuode	Cat #20211201
	Interleukin-10	pg/mL	IL_10	BD-FACSCANTO Ⅱ	Jiangxi nuode	Cat # 20190601	BD-FACSCANTO Ⅱ	Jiangxi nuode	Cat #20200501	BD-FACSCANTO Ⅱ	Jiangxi nuode	Cat #20211201
	Interleukin-2	pg/mL	IL_2	BD-FACSCANTO Ⅱ	Jiangxi nuode	Cat # 20190601	BD-FACSCANTO Ⅱ	Jiangxi nuode	Cat #20200501	BD-FACSCANTO Ⅱ	Jiangxi nuode	Cat #20211201
	Interleukin-4	pg/mL	IL_4	BD-FACSCANTO Ⅱ	Jiangxi nuode	Cat # 20190601	BD-FACSCANTO Ⅱ	Jiangxi nuode	Cat #20200501	BD-FACSCANTO Ⅱ	Jiangxi nuode	Cat #20211201
	Interleukin-6	pg/mL	IL_6	BD-FACSCANTO Ⅱ	Jiangxi nuode	Cat # 20190601	BD-FACSCANTO Ⅱ	Jiangxi nuode	Cat #20200501	BD-FACSCANTO Ⅱ	Jiangxi nuode	Cat #20211201
	NK cell ratio	%	NK_CD16_CD56	BD-FACSCANTO Ⅱ	BD	Cat # 33593	BD-FACSCANTO Ⅱ	BD	Cat #92766	BD-FACSCANTO Ⅱ	Jiangxi nuode	Cat #20211201
	NK cell counts	/μL	CD16_CD56_absolute_value	BD-FACSCANTO Ⅱ	BD	Cat # 33593	BD-FACSCANTO Ⅱ	BD	Cat #92766	BD-FACSCANTO Ⅱ	BD	Cat #23747
	Rheumatoid factor	IU/mL	RF	BECKMAN-AU5821	Beckman Coulter	Cat # 2444	BECKMAN-AU5821	Beckman Coulter	Cat #2464	BD-FACSCANTO Ⅱ	BD	Cat #23747
	Serum immunoglobulin A	g/L	IgA	BECKMAN-AU5821	Beckman Coulter	Cat # 2536	BECKMAN-AU5821	Beckman Coulter	Cat #2541	BECKMAN-AU5821	Beckman Coulter	Cat #2745
	Serum immunoglobulin G	g/L	IgG	BECKMAN-AU5821	Beckman Coulter	Cat # 2537	BECKMAN-AU5821	Beckman Coulter	Cat #2541	BECKMAN-AU5821	Beckman Coulter	Cat #2544
	Serum immunoglobulin M	g/L	IgM	BECKMAN-AU5821	Beckman Coulter	Cat # 2538	BECKMAN-AU5821	Beckman Coulter	Cat #2541	BECKMAN-AU5821	Beckman Coulter	Cat #2545
	Tumor necrosis factor-α	pg/mL	TNF_α	BD-FACSCANTO Ⅱ	Jiangxi nuode	Cat # 20190601	BD-FACSCANTO Ⅱ	Jiangxi nuode	Cat #20200501	BECKMAN-AU5821	Beckman Coulter	Cat #2544
Electrolyte	Arterial blood calcium	mmol/L	Ca_bg	GEM Premier 3500	Werfen	Cat #909967-024	GEM Premier 3500	Werfen	Cat # 010839A	/	/	/
	Arterial blood potassium	mmol/L	potassium_bg	GEM Premier 3500	Werfen	Cat #909967-025	GEM Premier 3500	Werfen	Cat # 010839A	/	/	/
	Arterial blood sodium	mmol/L	sodium_bg	GEM Premier 3500	Werfen	Cat #909967-026	GEM Premier 3500	Werfen	Cat # 010839A	/	/	/
	Serum calcium	mmol/L	CA	BECKMAN-AU5821	Beckman Coulter	Cat # AUZ6901	BECKMAN-AU5821	Beckman Coulter	Cat #AUZ7931	BECKMAN-AU5821	Beckman Coulter	Cat #AUZ9333
	Serum chlorine	mmol/L	CL	BECKMAN-AU5821	Beckman Coulter	Cat # AUZ6952	BECKMAN-AU5821	Beckman Coulter	Cat #AUZ8696	BECKMAN-AU5821	Beckman Coulter	Cat #AUZ9434
	Serum magnesium	mmol/L	Mg	BECKMAN-AU5821	Beckman Coulter	Cat # AUZ6692	BECKMAN-AU5821	Beckman Coulter	Cat #AUZ8238	BECKMAN-AU5821	Beckman Coulter	Cat #AUZ9372
	Serum phosphorus	mmol/L	P	BECKMAN-AU5821	Beckman Coulter	Cat # AUZ6805	BECKMAN-AU5821	Leadman	Cat #20091605	BECKMAN-AU5821	Leadman	Cat #21061105
	Serum potassium	mmol/L	K	BECKMAN-AU5821	Beckman Coulter	Cat # AUZ6952	BECKMAN-AU5821	Beckman Coulter	Cat #AUZ8696	BECKMAN-AU5821	Beckman Coulter	Cat #AUZ9434
	Serum sodium	mmol/L	sodium	BECKMAN-AU5821	Beckman Coulter	Cat # AUZ6952	BECKMAN-AU5821	Beckman Coulter	Cat #AUZ8696	BECKMAN-AU5821	Beckman Coulter	Cat #AUZ9434
	Serum iron	μmol/L	Fe	BECKMAN-AU5821	Meikang	Cat # 180925101	BECKMAN-AU5821	Leadman	Cat # 20082503	BECKMAN-AU5821	Leadman	Cat #AUZ9992
Coagulation	Activated partial thromboplastin time	s	APTT	SYSMEX-CS-5100	Sysmex	Cat # 556966	STA R Max	STAGO	Cat # 256815	STA R Max	STAGO	Cat # 259331
	D-Dimer	mg/L	DD	SYSMEX-CS-5100	Sysmex	Cat # 562567	STA R Max	STAGO	Cat # 256771	STA R Max	STAGO	Cat # 259453
	Fibrinogen	g/L	FIB	SYSMEX-CS-5100	Sysmex	Cat # 565014	STA R Max	STAGO	Cat # 256879	STA R Max	STAGO	Cat # 259107
	International normalized ratio	/	INR	/	/	/	/	/	/	/	/	/
	Prothrombin time	s	PT	SYSMEX-CS-5100	Sysmex	Cat # 565642	STA R Max	STAGO	Cat # 256475	STA R Max	STAGO	Cat # 258744
	Thrombin time	s	TT	SYSMEX-CS-5100	Sysmex	Cat # 563501	STA R Max	STAGO	Cat # 256533	STA R Max	STAGO	Cat # 257490
Cardic function	B type natriuretic peptide	pg/mL	BNP	BECKMAN-AU5821	Alere San Diego	Cat #921241	BECKMAN-AU5821	Alere San Diego	Cat #921990	/	/	/
	Creatine kinase isoenzyme MB	ng/mL	CKMB	BECKMAN-DXI800	Beckman Coulter	Cat # 832253	BECKMAN-AU5821	BSBE	Cat #20-0927	/	/	/
	Creatine kinase	U/L	CK	BECKMAN-AU5821	Beckman Coulter	Cat # AUZ6919	BECKMAN-AU5821	Leadman	Cat #20091706	BECKMAN-AU5821	Leadman	Cat #21071703
	Lactate dehydrogenase	U/L	LDH	BECKMAN-AU5821	Beckman Coulter	Cat # AUZ6980	BECKMAN-AU5821	Leadman	Cat #20073005	/	/	/
	Myoglobin	ng/mL	MYO	BECKMAN-DXI800	Beckman Coulter	Cat # 832331	BECKMAN-DXI800	Beckman Coulter	Cat #922003	/	/	/
	N terminal pro B type natriuretic peptide	pg/mL	NT_proBNP	ROCHE-COBAS-E411	Roche	Cat #37537601	ROCHE-COBAS-E411	Roche	Cat #46625403	/	/	/
	Troponin I	ng/mL	TNT_I	BECKMAN-DXI800	Beckman Coulter	Cat # 832157	BECKMAN-DXI800	Beckman Coulter	Cat #922394	/	/	/
	Troponin T	ng/mL	TNT_T	ROCHE-COBAS-E411	Roche	Cat # 38153901	ROCHE-COBAS-E411	Roche	Cat #43677301	/	/	/
Complete blood count	White blood cell count	×109/L	WBC	SYSMEX-XE-2100	SYSMEX	Cat # FFD-A8099; Cat # FFS-A9047; Cat # SE-G8002; Cat # PK-G9250; Cat #CL-50- A8001; Cat #FBA- R7057; Cat #SLS-A9002.	SYSMEX-XN	SYSMEX	Cat #CELLPACK DST-A0005; Cat #CELLPACK DFL-A0007; Cat #SULFOLYSER-A0012; Cat #Lysercell WPC-A0007; Cat #Lysercell WNR-A0027; Cat #Lysercell WDF-A0027; Cat #Fluorocell WPC-A0013; Cat #Fluorocell WNR-A0001; Cat #Fluoroc ell WDF-A0054; Cat #Fluorocell RET-A0031; Cat #Fluorocell PLT-A0030.	SYSMEX-XN	SYSMEX	Cat #CELLPACK DST-A1001;Cat #CELLPACK DFL-A1001;Cat #SULFOLYSER-A1011;Cat #Lysercell WPC-A0012;Cat #Lysercell WNR-A1032;Cat #Lysercell WDF-A1018;Cat #Fluorocell WPC-A1005;Cat #Fluorocell WNR-A1041;Cat #Fluoroc ell WDF-A1058;Cat #Fluorocell RET-A1020;Cat #Fluorocell PLT-A0067;Cat #DCL-300A-G1424
	Neutrophil count	×109/L	N	SYSMEX-XE-2100	SYSMEX		SYSMEX-XN	SYSMEX		SYSMEX-XN	SYSMEX
	Neutrophil ratio	%	NR	SYSMEX-XE-2100	SYSMEX		SYSMEX-XN	SYSMEX		SYSMEX-XN	SYSMEX
	Lymphocyte count	×109/L	L	SYSMEX-XE-2100	SYSMEX		SYSMEX-XN	SYSMEX		SYSMEX-XN	SYSMEX
	Lymphocyte ratio	%	LR	SYSMEX-XE-2100	SYSMEX		SYSMEX-XN	SYSMEX		SYSMEX-XN	SYSMEX
	Monocyte count	×109/L	M	SYSMEX-XE-2100	SYSMEX		SYSMEX-XN	SYSMEX		SYSMEX-XN	SYSMEX
	Monocyte ratio	%	MR	SYSMEX-XE-2100	SYSMEX		SYSMEX-XN	SYSMEX		SYSMEX-XN	SYSMEX
	Eosinophil count	×109/L	E	SYSMEX-XE-2100	SYSMEX		SYSMEX-XN	SYSMEX		SYSMEX-XN	SYSMEX
	Eosinophil ratio	%	ER	SYSMEX-XE-2100	SYSMEX		SYSMEX-XN	SYSMEX		SYSMEX-XN	SYSMEX
	Basophil count	×109/L	B	SYSMEX-XE-2100	SYSMEX		SYSMEX-XN	SYSMEX		SYSMEX-XN	SYSMEX
	Basophil ratio	%	BR	SYSMEX-XE-2100	SYSMEX		SYSMEX-XN	SYSMEX		SYSMEX-XN	SYSMEX
	Red blood cell count	×1012/L	RBC	SYSMEX-XE-2100	SYSMEX		SYSMEX-XN	SYSMEX		SYSMEX-XN	SYSMEX
	Hemoglobin	g/L	Hb	SYSMEX-XE-2100	SYSMEX		SYSMEX-XN	SYSMEX		SYSMEX-XN	SYSMEX
	Hematocrit	L/L	Hct	SYSMEX-XE-2100	SYSMEX		SYSMEX-XN	SYSMEX		SYSMEX-XN	SYSMEX
	Mean corpuscular volume	fL	MCV	SYSMEX-XE-2100	SYSMEX		SYSMEX-XN	SYSMEX		SYSMEX-XN	SYSMEX
	Mean corpuscular hemoglobin	pg	MCH	SYSMEX-XE-2100	SYSMEX		SYSMEX-XN	SYSMEX		SYSMEX-XN	SYSMEX
	Mean corpuscular hemoglobin concentration	g/L	MCHC	SYSMEX-XE-2100	SYSMEX		SYSMEX-XN	SYSMEX		SYSMEX-XN	SYSMEX
	Red blood cell distribution width	%	RDW	SYSMEX-XE-2100	SYSMEX		SYSMEX-XN	SYSMEX		SYSMEX-XN	SYSMEX
	Platelet	×109/L	PLT	SYSMEX-XE-2100	SYSMEX		SYSMEX-XN	SYSMEX		SYSMEX-XN	SYSMEX
	Mean platelet volume	fL	MPV	SYSMEX-XE-2100	SYSMEX		SYSMEX-XN	SYSMEX		SYSMEX-XN	SYSMEX
	Platelet crit	L/L	PLT_Pct	SYSMEX-XE-2100	SYSMEX		SYSMEX-XN	SYSMEX		SYSMEX-XN	SYSMEX
	Platelet volume distribution width	%	PDW	SYSMEX-XE-2100	SYSMEX		SYSMEX-XN	SYSMEX		SYSMEX-XN	SYSMEX
Blood lipids	Apolipoprotein A1	g/L	APOA1	BECKMAN-AU5821	Beckman Coulter	Cat # AA0183	BECKMAN-AU5821	Leadman	Cat #20091311	BECKMAN-AU5821	Leadman	Cat #21101217
	Apolipoprotein B	g/L	APOB	BECKMAN-AU5821	Beckman Coulter	Cat # AB0276	BECKMAN-AU5821	Leadman	Cat #20092402	BECKMAN-AU5821	Leadman	Cat #21060415
	High density lipoprotein cholesterol	mmol/L	HDL-C	BECKMAN-AU5821	Beckman Coulter	Cat # AUZ6793	BECKMAN-AU5821	Leadman	Cat #20072709	BECKMAN-AU5821	Leadman	Cat #21052108
	Lipoprotein(α)	mg/L	LP(a)	BECKMAN-AU5821	Leadman	Cat # 20190108	BECKMAN-AU5821	Leadman	Cat #20091811	/	/	/
	Low density lipoprotein cholesterol	mmol/L	LDL-C	BECKMAN-AU5821	Beckman Coulter	Cat # AUZ6686	BECKMAN-AU5821	Leadman	Cat #20081107	BECKMAN-AU5821	Leadman	Cat #21060407
	Total cholesterol	mmol/L	TCHOL	BECKMAN-AU5821	Beckman Coulter	Cat # AUZ6799	BECKMAN-AU5821	Leadman	Cat #20061901	BECKMAN-AU5821	Leadman	Cat #21070202
	Triglyceride	mmol/L	TRIG	BECKMAN-AU5821	Beckman Coulter	Cat # AUZ6673	BECKMAN-AU5821	Leadman	Cat #20052503	BECKMAN-AU5821	Leadman	Cat #21071314
Blood glucose	Glycosylated hemoglobin	%	HbA1c	TOSOH-HLC-723G8	TOSOH	Cat # 195910CL5095K	TOSOH-HLC-723G8	TOSOH	Cat # 195910CL5095K	/	/	/
	Glycosylated serum protein	mmol/L	GSP	BECKMAN-AU5821	Meikang	Cat # 190221101	BECKMAN-AU5821	Maike	Cat #190221101	/	/	/
	Serum glucose	mmol/L	GLU	BECKMAN-AU5821	Beckman Coulter	Cat # AUZ6734	BECKMAN-AU5821	Leadman	Cat #20082006	BECKMAN-AU5821	Leadman	Cat #21090307
Antibody	IgG antibody	AU/mL	anti_nCoV_IgG	YHLO-iFlash3000-A	YHLO	Cat # 20200206	YHLO-iFlash3000-A	YHLO	Cat # 20210101	iFlash3000-A	iFlash	Cat # 20211201
	IgM antibody	AU/mL	anti_nCoV_IgM	YHLO-iFlash3000-A	YHLO	Cat # 20200206	YHLO-iFlash3000-A	YHLO	Cat # 20210102	iFlash3000-A	iFlash	Cat # 20211101
	Neutralizing antibody	μg/mL	neutralizing_antibody	WANTAI-Caris200	WanTai	Cat #K20210412	WANTAI-Caris200	WanTai	Cat #K20210412	WanTai	WanTai	Cat #K20211223
Pulmonary function	Arterial base excess	mmol/L	BE_bg	GEM Premier 3500	Werfen	Cat #909967-024	/	/	/	/	/	/
	Arterial blood lactate concentration	mmol/L	LAC_bg	GEM Premier 3500	Werfen	Cat #909967-024	/	/	/	/	/	/
	Arterial blood pH	mmol/L	PH_bg	GEM Premier 3500	Werfen	Cat #909967-024	/	/	/	/	/	/
	Body temperature	°C	T_bg	/	/	/	/	/	/	/	/	/
	Arterial HCO3- concentration	mmol/L	HCO3_bg	GEM Premier 3500	Werfen	Cat #909967-024	/	/	/	/	/	/
	Arterial Oxygen partial pressure	mmHg	PO2_bg	GEM Premier 3500	Werfen	Cat #909967-024	/	/	/	/	/	/
	Arterial oxygen saturation	%	SaO2_bg	GEM Premier 3500	Werfen	Cat #909967-024	/	/	/	/	/	/
	Arterial partial pressure of carbon dioxide	mmHg	PCO2_bg	GEM Premier 3500	Werfen	Cat #909967-024	/	/	/	/	/	/
	Fraction of inspired oxygen	%	FiO2_bg	GEM Premier 3500	Werfen	Cat #909967-024	/	/	/	/	/	/
	Oxygenation index	mmHg	OI_bg	GEM Premier 3500	Werfen	Cat #909967-024	/	/	/	/	/	/

## Sheet: Multi-omics
Reagent or Resource	Source	Lot number
Chemicals, Peptides, and Recombinant Proteins
Triethylammonium bicarbonate buffer (TEAB)	Sigma-Aldrich	Cat # T7408
Urea	Sigma-Aldrich	Cat # U1250
Tris (2-carboxyethyl) phosphine (TCEP)	Adamas-beta	Cat # 61820E
Iodoacetamide (IAA)	Sigma-Aldrich	Cat # I6125
Trypsin	Hualishi Tech	Cat # HLS TRY001C
Lys-C	Hualishi Tech	Cat # HLS LYS001C
Trifluoroacetic acid (TFA)	Thermo Fisher Scientific	Cat # 85183
Water	Thermo Fisher Scientific	Cat # W6-4
Acetonitrile	Thermo Fisher Scientific	Cat # A955-4
Formic acid (FA)	Thermo Fisher Scientific	Cat # A117-50
Ammonium hydroxide solution	Sigma-Aldrich	Cat # 221228
Methanol	Sigma-Aldrich	Cat # 3486
Critical Commercial Assays
TMTpro 16plex reagents	Thermo Fisher Scientific	Cat # A44520
High SelectTM Top-14 Abundant Protein Depletion Mini Spin Columns	Thermo Fisher Scientific	Cat #A36370
SOLAμ	Thermo Fisher Scientific	Cat # 62209-001
Pierce™ C18 Spin Columns	Thermo Fisher Scientific	Cat # 89870
Deposited Data
Mass spectrometry data	https://www.iprox.org
Machine learning codes	https://github.com/guomics-lab/CVDSBR
