# Supplementary material for: Pulmonary and Renal Long COVID at Two-year Revisit
Source: Research Square preprint supplement (doi:10.21203/rs.3.rs-1513873/v1), 2022-04-19
Supplement: Supplementary file 4 [file TableS5.xlsx]

## Sheet: SP2
Label	Batch1	Batch2	Batch3	Batch4	Batch5	Batch6	Batch7	Batch8	Batch9	Batch10
126	Pool	Pool	Pool	Pool	Pool	Pool	Pool	Pool	Pool	Pool
127N	R097_12	R078_4	R131_10	R059_6	R134_15	R011_1	R112_15	R052_9	R056_10	R127_3
127C	R097_22	R078_30	R131_25	R059_17	R134_38	R011_26	R112_52	R052_13	R056_10_rep	R127_3_rep
128N	R097_383	R078_375	R131_373	R059_379	R134_380	R011_382	R112_393	R052_381	R056_19	R127_15
128C	R004_8	R010_6	R102_16	R123_5	R107_9	R018_17	R093_8	R007_7	R056_394	R127_395
129N	R004_24	R010_27	R102_29	R123_44	R107_22	R018_23	R093_40	R007_7_rep	R095_10	R084_4
129C	R004_386	R010_383	R102_396	R123_391	R107_386	R018_386	R093_377	R007_387	R095_24	R084_27
130N	R044_13	R001_14	R005_12	R006_31	R037_23	R017_12	R130_3	R082_4	R095_376	R084_385
130C	R044_13_rep	R001_26	R005_25	R006_36	R037_23_rep	R017_44	R130_22	R082_20	R014_6	Ctrl
131N	R044_381	R001_388	R005_383	R006_397	R037_387	R017_380	R130_363	R082_374	R014_25	Ctrl
131C	R121_3	R009_12	R040_5	R080_5	R039_2	R013_10	R128_9	R051_6	R014_393	Ctrl
132N	R121_40	R009_15	R040_26	R080_22	R039_12	R013_36	R128_25	R051_41	Ctrl	Ctrl
132C	R121_385	R009_384	R040_377	R080_375	R039_379	R013_383	R128_363	R051_387	Ctrl	Ctrl
133N	Ctrl	Ctrl	Ctrl	Ctrl	Ctrl	Ctrl	Ctrl	Ctrl	Ctrl	Ctrl
133C	Ctrl	Ctrl	Ctrl	Ctrl	Ctrl	Ctrl	Ctrl	Ctrl	Ctrl	Ctrl
134N	Ctrl	Ctrl	Ctrl	Ctrl	Ctrl	Ctrl	Ctrl	Ctrl	Ctrl	Ctrl

## Sheet: UP2
Label	Batch1	Batch2	Batch3	Batch4	Batch5	Batch6
126	Pool	Pool	Pool	Pool	Pool	Pool
127N	R078_5	R063_6	R136_377_rep	R075_379_rep	R057_384_rep	R118_14_rep
127C	R078_5_rep	R063_6_rep	R076_10	R075_7	R057_11	R056_10
128N	R078_375	R063_379	R076_381	R075_379	R057_384	R056_394
128C	R010_9	R080_6	R136_12	R066_6	R068_5	R094_14
129N	R010_383	R080_375	R136_377	R066_376	R068_376	R094_392
129C	R122_19	R064_9	R046_8	R052_8	R134_16	R118_14
130N	R122_384	R064_381	R046_382	R052_381	R134_380	R118_397
130C	R009_16	R037_14	R093_9	R049_5	R051_14	R084_4
131N	R009_384	R037_387	R093_377	R049_379	R051_387	R084_385
131C	R059_8	R085_6	R130_4	R092_9	Ctrl	Ctrl
132N	R059_379	R085_385	R130_363	R092_373	Ctrl	Ctrl
132C	Ctrl	Ctrl	Ctrl	Ctrl	Ctrl	Ctrl
133N	Ctrl	Ctrl	Ctrl	Ctrl	Ctrl	Ctrl
133C	Ctrl	Ctrl	Ctrl	Ctrl	Ctrl	Ctrl
134N	Ctrl	Ctrl	Ctrl	Ctrl	Ctrl	Ctrl
