# Supplementary material for: Pulmonary and Renal Long COVID at Two-year Revisit
Source: Research Square preprint supplement (doi:10.21203/rs.3.rs-1513873/v1), 2022-04-19
Supplement: Supplementary file 5 [file TableS6.xlsx]

## Sheet: Patient enrollment
Patient	Enrollment		Date			Severity	Chest CT				Kidney	Classification
Patient	Clinical indicators	Serum proteins	Onset	Revisit	Sampling from onset	Severity	Lobes involved	Pathy/GGO	Consolidation	Fibrosis	eGFR (mL/min/1.73m2)	Classification
R007	Yes	Yes	2020-01-19	2021-02-08	387	Severe	1	Yes	No	No	7	LC
R014	Yes	Yes	2020-01-25	2021-02-20	393	non-Severe	0	No	No	No	179	RC
R027	Yes	No	2020-01-19	2021-02-09	388	non-Severe	0	No	No	No	42	LC
R032	Yes	Yes	2020-01-25	2021-01-26	368	Severe	1	No	No	Yes	87	LC
R050	Yes	Yes	2020-01-24	2021-03-08	410	non-Severe	0	No	No	No	125	RC
R052	Yes	Yes	2020-01-26	2021-02-09	381	non-Severe	0	No	No	No	110	RC
R055	Yes	Yes	2020-01-31	2021-04-01	427	non-Severe	2	No	No	Yes	NA	LC
R058	Yes	Yes	2020-01-18	2021-07-01	531	non-Severe	0	No	No	No	100	RC
R088	Yes	No	2020-02-01	2021-02-20	386	non-Severe	0	No	No	No	153	RC
R091	Yes	Yes	2020-02-01	2021-06-01	487	non-Severe	1	Yes	No	No	NA	LC
R096	Yes	Yes	2020-02-01	2021-06-15	501	Severe	3	No	No	Yes	NA	LC
R101	Yes	Yes	2020-01-30	2021-08-30	579	non-Severe	0	No	No	No	133	RC
R121	Yes	Yes	2020-01-23	2021-02-10	385	Severe	1	No	No	Yes	104	LC
R124	Yes	No	2020-01-09	2021-02-08	397	Severe	2	Yes	No	Yes	99	LC
R138	Yes	Yes	2020-01-23	2021-03-03	406	non-Severe	NA	NA	NA	NA	87	LC

## Sheet: Serum protein dataset
Protein	Peptide.Sequence	Peptide.Modified.Sequence	pool_rep1	pool_rep2	pool_rep3	R007-19	R050-8	R096-7	R091-19	R055-13	R055-15	R055-2	R055-21	R055-22	R055-28	R055-29	R007-7	R055-3	R091-10	R091-15	R050-9	R091-24	R091-25	R091-6	R014-21	R096-21	R096-22	R091-20	R096-8	R101-18	R101-19	R014-25	R101-21	R101-29	R101-3	R101-30	R101-4	R121-13	R121-3	R121-19	R014-6	R52-13	R52-13_rep	R058-16	R058-16_rep	R138-4	R138-4_rep	R032-4	R050-10
Biognosys standards	LGGNEQVTR	LGGNEQVTR	639616	3523618	1689224	7500008	3853628	714180	1970281	4260050	5505317	2907911	3843366	6063425	2500135	660815	3293903	4488849	3127576	2755352	5286159	4427833	3908113	2346218	4103687	4093259	4078823	3650176	6834349	4249853	5075440	5286316	5884556	5937217	2933099	814186	6194979	2017140	4230459	3980143	195806	5361772	2147050	3987674	5341921	4353224	3725426	7602137	429547
Biognosys standards	GAGSSEPVTGLDAK	GAGSSEPVTGLDAK	12237626368	11819226112	11412424704	13318921216	8289404928	8694285312	13430016000	14540068864	7891369472	6508000768	11831841792	7053109248	13377235968	4275570176	10039231488	9259909120	15087836160	11549219840	8341430784	13173648384	13929307136	14293332992	4955528192	10462668800	10480239616	14540016640	8993068032	12901605376	9813692416	16989377536	12903123968	14167139328	18229823488	9691952128	9484441600	13952733184	13415035904	12923696128	9703946240	7320204800	6377777152	832743808	171248176	428642944	378676192	10520135680	6811324416
Biognosys standards	VEATFGVDESNAK	VEATFGVDESNAK	142557440	125478672	148104432	294870464	259874144	300868192	136670384	153643968	180599904	232692288	269702656	222185168	215890592	621611456	208015856	228637984	194146816	272070272	235682336	191267424	168553120	327204864	172679088	180664048	177163792	129944840	239648192	221322080	167296320	276276768	242066416	201139808	157314032	189833456	155907392	116633680	172314864	134817792	322890784	161132336	190033184	259803872	272063712	211164480	237557520	255484560	183828208
Biognosys standards	YILAGVENSK	YILAGVENSK	165057632	170595840	122459208	204161200	176778528	150563600	195202704	123392944	222846256	180225280	190452944	254696448	132569272	378891040	203074768	187709824	205126032	221806336	257917376	219559680	196421248	345813344	152256016	164485904	129504832	195223712	305395776	211883536	252959664	174676400	216007136	185046576	128676424	248975744	220780416	137906464	178154000	132198624	174594672	213760432	226374816	224154416	214780560	187788416	197472384	231421280	137747088
Biognosys standards	TPVISGGPYEYR	TPVISGGPYEYR	244769392	168325360	176750960	337068000	321102144	216763712	314795840	221367264	333930432	281790848	329408384	399034560	217401648	582907520	311790400	293825824	263604656	370839232	350073568	345831744	278109440	542106112	184828752	223559008	175523536	239921872	394822560	282665088	283171200	335056672	327369792	221845840	147701072	336298560	295731936	137694416	251506416	174289952	230187504	295555200	329013824	296208736	324770752	268254272	306729888	397436128	217089648
Biognosys standards	TPVITGAPYEYR	TPVITGAPYEYR	241639360	189747248	185811424	307810432	340273920	320214432	371648480	322334560	385165184	298589536	385486688	427849344	301198560	656910336	329919520	322860576	369369408	379173760	377880256	445790336	369552288	602324800	286935840	230626256	172640640	261034256	394296672	268326464	310511296	363385728	312881216	234205760	214912672	337645472	280957056	180695040	247954592	172012352	407536928	331033120	358508032	339997760	327448096	286569056	307308896	413084544	365714944
Biognosys standards	DGLDAASYYAPVR	DGLDAASYYAPVR	310641888	288606560	283465536	378150528	528779744	491822400	392300544	410431808	504399488	521010528	490268864	592100864	414082496	828415808	460856576	481994208	501868672	564031040	524303040	522886720	464227808	827728768	491382304	310078976	260190272	224491360	357863712	247898016	270235456	465043424	286701440	249630368	215749424	280402304	313875424	215779488	261414480	203349392	530737952	344503936	367779328	433282368	405734880	342584544	369753472	642841600	477785600
Biognosys standards	ADVTPADFSEWSK	ADVTPADFSEWSK	602281664	489776288	522077440	665515008	1001669376	990210176	745670720	818359424	913883520	962619008	928269952	1008318272	827309248	1478691072	805336704	917494016	871504512	819533568	896537344	993652480	890699200	1398669440	851497984	528960160	458669376	346462080	708363328	536450112	574407296	757620032	590171840	409970112	345252000	599751424	612624832	351650944	408616320	404742304	941257152	580169408	608332096	723039616	674868864	614369152	642625600	1040084800	944774336
Biognosys standards	GTFIIDPGGVIR	GTFIIDPGGVIR	362194240	305841920	366276000	553561536	772361152	746708160	984342784	548236800	761810176	793125504	768479104	874290688	600953024	1169098112	710139008	777637888	783731200	778357248	679257344	778145664	691090240	1227675776	607387264	383897312	314696960	264634160	376617504	249175280	214464688	718123904	343865088	257568368	269117888	214916368	225599264	288851584	330630400	295217600	695836608	400737088	445872256	570898816	576494016	507194592	523547200	748851840	649886592
Biognosys standards	GTFIIDPAAVIR	GTFIIDPAAVIR	777821760	660084480	688708480	1316245504	1959975296	1977315456	2119720320	1657644288	1642066944	1923735552	1878968192	1859601280	1709057152	2672603136	1778218880	2018550272	1892276224	1879534720	1759843200	1985558656	1731622400	3164367872	1728994688	677047424	578481408	578400000	654865984	465753984	476812384	1867164672	554649024	440814592	478933824	363607168	374994944	450813280	455025664	480042880	2187601664	565339456	580842624	1057625664	969418432	931732224	970427520	1668556672	1931130496
Biognosys standards	LFLQFGAQGSPFLK	LFLQFGAQGSPFLK	250190224	199354336	198610784	5219841536	5917206016	7309652480	7846801408	6556958720	6402081792	6134923776	6246876672	6067226112	6665216512	11082230784	6981818880	4090325504	7540252160	4794402304	9172523008	6629163520	6148521984	11122059264	4280224256	701566720	649809088	1543035264	1655798528	713098752	1322345216	5506469376	818555584	647661824	867393024	980285248	724112320	519358912	453503072	943246464	6997873152	430031872	502169280	944330624	817817600	898191488	923138752	3993890048	7274066432
sp|P06744|G6PI_HUMAN	TLAQLNPESSLFIIASK	TLAQLNPESSLFIIASK	1352732	1206332	961284	3592415	1052122	674664	2970751	1394924	752038	575259	735671	556136	998896	178129	1260133	606617	2896316	2295850	570739	2154491	3323446	1441277	951958	537057	318380	3667002	1000764	783851	1001709	1164016	860236	993913	1316446	696745	705194	476924	461591	653225	1089943	88708	147014	1809203	1749742	795753	734811	314639	1187883
sp|P03952|KLKB1_HUMAN	GDTSTIYTNCWVTGWGFSK	GDTSTIYTNC[+57]WVTGWGFSK	20154534	16318581	18424506	5966925	14391992	12561735	15757026	35427536	8918700	16950874	17143724	6117590	18896442	2278996	15722480	11637879	10631598	5711029	6437213	6971123	3905032	7296847	17780588	11230490	9451453	7060864	8328223	6406385	10045370	16154584	13342107	12483535	13580230	9968278	10214444	26157686	17283568	21888414	28229648	2696048	3044990	59652172	56750296	56291736	54229516	19142130	19108356
sp|P03952|KLKB1_HUMAN	LVGITSWGEGCAR	LVGITSWGEGC[+57]AR	223609760	196796144	198158992	107756176	160091008	285203264	170413648	260611424	221212720	151422240	172343760	172396528	186027776	110199464	172658560	155137840	165260624	88223456	150638416	195568832	191162064	122882384	205783296	114981832	101565808	141090336	216725728	146374720	241160896	152808576	104959712	130267664	195178400	240280976	217456544	224840048	211973552	267955456	260545024	249378464	223722752	772664896	762368640	594376448	652183296	133965432	227635568
sp|P00747|PLMN_HUMAN	ATTVTGTPCQDWAAQEPHR	ATTVTGTPC[+57]QDWAAQEPHR	812257792	771988992	712949824	382611424	857941248	826657280	446688864	1120913408	730396352	618502272	773269568	534023168	794766144	323773536	589375808	572020992	651921280	264784768	567904064	490346176	551948928	429593344	750344512	860171520	667895872	499269312	557289920	648749824	786410112	1068770816	592697024	619424320	908209856	562600576	548955136	877380928	728820928	1085618304	999969664	664917952	749461632	2644887040	2534029824	1508157952	1915780480	704158080	1149910528
sp|P00747|PLMN_HUMAN	LSSPAVITDK	LSSPAVITDK	447961568	358984544	369000640	279105664	426568320	392520608	323516384	412186656	101557832	292380288	389274880	105461288	372649024	56811352	416659648	172406128	363014016	273204448	100031728	320817152	322264000	211905024	364987584	539731328	412950336	226598752	126645336	369068128	128070704	530043904	402330688	378225536	498298560	135613328	88676520	469121088	358991168	543728896	469006016	39986248	51545104	1923903488	2022665216	1121524480	1307303808	394461472	542803584
sp|A0A087WSY4|HV432_HUMAN	GLEWIGYIYHSGSTYYNPSLK	GLEWIGYIYHSGSTYYNPSLK	2437202	2261896	2162532	1572694	2311540	1778479	5210535	1751482	1191674	2484994	1581675	2407247	1848317	820006	880746	824975	3976721	3187761	2526683	4808903	5779406	2804947	2270086	1873420	2436517	4377573	2791678	1506078	2527755	1604824	1596852	2158366	1096110	2911076	2703824	3594529	2535833	4946184	2991828	1501310	1719616	108424	170817	211544	196445	3244884	1731950
sp|Q14515|SPRL1_HUMAN	NHGVDDDGDDDGDDGGTDGPR	NHGVDDDGDDDGDDGGTDGPR	772546	350538	310380	747335	744703	756615	483564	618903	34276	237411	490738	32847	320136	9963	1193893	362049	1198686	718946	37714	1109437	1125453	795768	1767044	100293	763794	971949	33339	314678	35900	625631	340048	673266	953406	14017	4308	830198	593469	956870	101872	1172965	944886	136931	134280	143784	127560	148488	375505
sp|P15169|CBPN_HUMAN	YGGPNHHLPLPDNWK	YGGPNHHLPLPDNWK	9449183	5387960	7090472	7807371	10391191	8736312	12045409	13111874	5837621	5940263	6962095	4110090	8742789	1400691	8365896	4700318	6205049	2938834	5509771	6274380	5809598	3405413	5794725	6716885	5026971	4764087	4472502	2853516	7490104	7646841	2284964	5298901	7671994	8102177	4057068	12067384	12253664	11875203	10144067	3717942	4405922	15576792	14032317	5143328	6234885	10800124	15585944
sp|P15169|CBPN_HUMAN	SIPQVSPVR	SIPQVSPVR	37062192	29011970	28013322	52861980	34639020	28026762	35938960	37252612	23352882	21541258	35318992	21653920	35178420	17022208	45632548	25445202	37111276	31922450	22280220	32243552	28429632	25867490	25485632	40143968	27177260	33047642	17331154	21460272	21932436	31720096	20543426	24061920	43799096	20778896	20324544	53952176	52878712	49235180	27251228	16977778	18742352	164309760	147267488	87109312	103952512	37314952	31478404
sp|Q92820|GGH_HUMAN	SINGILFPGGSVDLR	SINGILFPGGSVDLR	7992141	6703403	7362017	9580432	15813396	6604037	11094060	10493296	5303346	3601078	6029997	5322887	5835896	2259471	10752213	4742061	6993809	6082144	11854237	8949529	8516592	4231147	3000065	5763518	6885140	8106409	5295406	1202587	4339482	3191641	1207472	2192727	5276858	5088595	3877808	8945644	7431696	6757460	4285674	7916519	8112155	17325300	16508954	26547316	25140444	17256644	10973450
sp|P22105|TENX_HUMAN	LSQLSVTDVTTSSLR	LSQLSVTDVTTSSLR	3154561	2510778	2445927	1616383	3842182	6427194	2569628	7466081	622206	2877993	5260970	380404	5229210	128449	2010586	4021850	2034497	1689148	682242	3237996	2870878	2026364	4806139	6091451	4361894	2725504	860336	3542044	851233	1857100	2799039	1736946	4100699	882539	863337	3091142	3036484	3527551	5904441	1774326	1671032	8594736	8418474	6547312	6545517	3678129	3333475
sp|P08246|ELNE_HUMAN	QAGVCFGDSGSPLVCNGLIHGIASFVR	QAGVC[+57]FGDSGSPLVC[+57]NGLIHGIASFVR	116565	117300	65212	1075	318884	0	101544	125182	64404	113465	102004	8621	185765	1556	312898	149995	51980	37064	29342	27734	66363	9079	163345	100099	12838	31993	22795	185821	80419	484040	167042	189025	246078	140414	86341	181854	135819	162105	25522	68331	11091	0	0	0	0	0	295468
sp|P02774|VTDB_HUMAN	GQELCADYSENTFTEYK	GQELC[+57]ADYSENTFTEYK	557245824	528461088	522218112	55492968	1010227520	833658880	55257580	1683514112	81992240	805078272	1137984896	52222552	1327932928	23252060	219063840	901436736	91199736	29612580	65224704	62954932	108623792	47495136	721510208	468093504	1195284864	64336048	59179964	494630592	79543520	807234560	403342592	658967488	845867584	61333848	66929156	1146292736	949677952	1198037632	870622336	31097782	32643964	514494528	506338752	405822784	430004352	286243200	1194268288
sp|Q96IY4|CBPB2_HUMAN	NAIWIDCGIHAR	NAIWIDC[+57]GIHAR	24275106	18110220	21857094	20230602	16030292	29206430	26502086	39871268	21759744	21227214	23996864	12649504	29056408	7419194	16946628	16936044	18281654	9134229	11127867	16296046	18396208	11951058	18039870	26169852	23204208	14485984	16119996	27466476	31716664	34639528	16476192	28873950	35192952	24019776	23126386	45448360	17718246	46308864	26159268	10964001	12784148	54248272	52419928	18964702	25237470	12787896	27997964
sp|Q96IY4|CBPB2_HUMAN	YTHGHGSETLYLAPGGGDDWIYDLGIK	YTHGHGSETLYLAPGGGDDWIYDLGIK	13147727	9866283	10459738	7674792	8605324	7486492	16481374	24639532	20169820	9773240	12837114	12886702	16534155	3380610	8499184	5326184	6246630	5922795	8520082	5947953	7583308	5316136	5648551	13920440	13293555	7869442	16502140	14656782	23383304	11313744	11019293	12607683	13554874	19487604	24389584	13918696	7232580	15396504	12610144	1964520	3586530	19933934	18760636	10345719	9219825	2872756	13750405
sp|Q92835|SHIP1_HUMAN	VFLHFEEEEITFAPTYR	VFLHFEEEEITFAPTYR	5435850	5883021	6887986	1684009	2018646	2283778	7580579	2743699	15246297	2046816	2278446	11396654	2121822	6498642	6901534	1395520	10091316	6144356	11310985	14804280	7985672	11999944	589431	2640407	2386403	14837126	10137789	383573	18737920	2890307	731865	1095554	1100977	12970221	14007703	2355590	901841	2054618	1355280	17504550	20032188	107764	30619	1332914	1018841	1248249	1919660
sp|Q86UD1|OAF_HUMAN	ALILGELEK	ALILGELEK	3077702	28920128	8680806	44480192	14243489	23439714	44141536	13493567	1703946	5874773	11734565	1553944	11764542	60855	24924320	6745521	25155064	52944824	2212586	16689811	36832600	9919908	17380906	13151293	21809150	37048320	2280783	11301164	880369	32305804	19426278	24047456	13398022	567906	3753871	32883482	5196664	18601900	536699	3702595	1065215	12359111	15781266	5210634	7128253	23439428	3614274
sp|Q86UD1|OAF_HUMAN	ASEQAELPR	ASEQAELPR	1485885952	984034048	1274387072	432957760	923131264	1264479744	473927360	1418972032	936493120	1105422720	1108740736	712270912	1066647552	598355712	2112667008	572785280	1231355136	383636384	1298418304	57931796	1861492096	1009558400	1108074496	1405988736	169313920	538394688	1598932224	782311040	1453403776	703807488	757842688	499831072	1083684096	1382875008	724728640	614362048	1179964800	941319808	1143581440	334627584	430440544	475141824	464629568	133271008	151333088	1328750336	1221204480
sp|P0DOX6|IGM_HUMAN	YFAHSILTVSEEEWNTGQTYTCVVAHEALPNR	YFAHSILTVSEEEWNTGQTYTC[+57]VVAHEALPNR	990743168	929893696	982567040	185332656	1134049152	727160768	1176966912	2321980160	1885515776	1920396672	1650464128	1480337152	2036328064	287771808	178831360	181412864	1408037632	392318656	442211584	937323776	1542721536	962881216	1080368256	873607808	920669312	1170525952	987444800	1952764800	1335003008	1049566080	1694399488	1284935808	1059444800	1283343872	991248512	136912752	223398720	395832544	1898027008	516242304	584358912	72902528	69414624	43896388	42042112	1050125248	2097084032
sp|P0DJI8|SAA1_HUMAN	FFGHGAEDSLADQAANEWGR	FFGHGAEDSLADQAANEWGR	2136166016	1925958912	2091630336	4874947072	297276736	265325280	205222016	56881216	187903568	3798400512	92944784	446141280	132565152	28575998	1065003008	24445798	3245708288	1328295808	410382368	145058752	209234208	1328592896	37450872	21560324	21442554	296627168	5499012096	121316904	57582740	407481632	61129368	2880550400	2002803712	50162972	60779628	8663646208	6884582912	1490787328	139626752	1339215232	1418295296	51617492	47873252	1394024576	1385432320	3843289600	445022496
sp|P05155|IC1_HUMAN	GVTSVSQIFHSPDLAIR	GVTSVSQIFHSPDLAIR	483017856	360460576	423625920	163476864	726910784	645335168	145677760	1308731264	200792736	693905600	610783040	136318112	712449728	44479252	932619712	431900800	242350848	69444912	221667456	108434200	221933680	183553296	233123760	365501888	456884448	120236024	246070560	316519168	200489136	392597568	224434208	307245248	831671872	226518128	166582528	241516448	740326976	701449664	455221472	68070512	78998432	801502336	750341248	484444512	460780704	384804000	899275264
sp|P05155|IC1_HUMAN	LEDMEQALSPSVFK	LEDM[+16]EQALSPSVFK	13075959	11762726	11213984	8866270	22841980	12707623	6287054	17815858	9832660	11852596	10698339	9544178	11970722	5471400	21341376	8439222	10040022	4091229	7646808	6540985	8167126	7861292	6881633	6495084	31336024	6558619	10051726	7165190	9745199	13904751	6201991	9186633	13963200	9366830	8780265	5242064	31790972	19852200	8041207	8095471	8577672	14513908	13508926	21263516	20848614	8664800	24544652
sp|P00738|HPT_HUMAN	VGYVSGWGR	VGYVSGWGR	21625987072	18523443200	18832623616	37703544832	25791817728	14974758912	22929477632	190321856	17270200320	30551769088	590572096	18732169216	670609984	14254303232	30624653312	653222208	28075716608	20396189696	31583188992	17022878720	18305247232	24014452736	5976799744	12268960768	10146480128	16904275968	37838618624	451157856	14507217920	13133200384	406594048	26622451712	411660672	19296708608	12074219520	24498006016	32260087808	22822809600	9048936448	27588665344	30243037184	852321600	805551680	1412950272	1777278336	28151848960	24405501952
sp|P00738|HPT_HUMAN	SPVGVQPILNEHTFCAGMSK	SPVGVQPILNEHTFC[+57]AGM[+16]SK	2525451264	2302242816	2052032768	5189364736	1874020992	1450101632	2607332096	25858660	1446140160	1481636608	32854624	1885797888	67299488	1209663744	7930632192	52236960	4414254080	2322868992	3078359040	2360873984	2750546432	3544236800	247773312	711027968	1541670656	2997840384	3485389056	38978940	1203764224	832852736	32711926	1600082688	45629856	1899420160	1067103808	2473531904	2607459328	2234619392	796980928	4073360384	4308881408	82722312	84225760	167274880	184233728	2723957248	1691182464
sp|P01871|IGHM_HUMAN	QIQVSWLR	QIQVSWLR	917796864	870401664	895425856	1537751	340698976	156481872	7067367	154376704	2452577792	234748976	154926208	2425261824	165272320	1364155776	72628784	189294768	57334548	9355401	1907293824	41611504	174180784	48691684	70234448	55745416	85128704	97910192	3833814784	311348416	1652502400	237017232	191382176	520407008	642149056	2288610304	1287851648	368123776	115035136	142556256	168970080	130283872	127978848	149842384	145545344	55985588	55676052	1918458240	333074304
sp|P01871|IGHM_HUMAN	YFAHSILTVSEEEWNTGETYTCVVAHEALPNR	YFAHSILTVSEEEWNTGETYTC[+57]VVAHEALPNR	1695978496	1546353408	1626762496	289087392	1739783936	1090690432	1932051328	3707391488	3026045952	3222291968	2823560704	2536398848	3536209408	1091045120	487618784	606786816	2356847872	954148096	1515946624	1991566592	2471067392	1649821184	1654377472	1480731264	1561754368	1938110464	2929433856	3209118976	2055374976	1584716288	2814271488	2194388224	1890218880	2067352064	1606666880	224181168	374567776	672798080	2778477568	874724544	938383808	125022288	117901112	78284040	75399648	1588068992	3036390656
sp|P01599|KV117_HUMAN	LIYAASSLQSGVPSR	LIYAASSLQSGVPSR	113855776	95871152	96308376	49007268	103293328	100448840	28075324	215679440	109077160	77267944	133296848	84879408	171208512	47628976	44124188	133691904	36246260	16025992	58523736	29208792	35510024	24278264	85814544	54045760	111917120	31374388	76706792	181468448	79570736	206006336	173446224	206572736	220436144	83999160	71516864	160908048	142178656	140044064	140233024	63115920	74857528	3244391	3331069	2049359	2373950	140529184	163492720
sp|P06396|GELS_HUMAN	DPDQTDGLGLSYLSSHIANVER	DPDQTDGLGLSYLSSHIANVER	24709206	19002846	19484354	6031281	42767228	41687268	12693811	47191224	4533278	35610808	32721574	3795917	34927408	1637027	11759753	23994398	7305260	5049586	7467852	9627639	11549250	6469252	29323438	24412242	67283216	8857799	7481099	23102266	5554512	16241852	19722754	12973350	30445834	4885826	4973031	32232956	27704926	41873356	29416554	1859849	2171720	39776392	36220836	16621599	17068880	13651582	52380312
sp|P06396|GELS_HUMAN	TPSAAYLWVGTGASEAEK	TPSAAYLWVGTGASEAEK	250816224	196624208	217258976	118167416	234871328	233530752	103661096	321763328	218646768	225950560	191063136	164510048	216119584	102516160	222596848	155538256	118318896	61159608	216873248	105856624	140093088	125580776	227939248	304961856	243410656	96801416	244286944	162420608	280011808	104780008	129474688	95001672	176916432	249467552	252440608	241534944	218398800	293091520	220428144	72711616	74381552	895874752	866910656	460158496	488761600	247029120	349607040
[truncated: 2 more columns]
